# Supplementary material for: New Hygrocins K–U and Streptophenylpropanamide A and Bioactive Compounds from the Marine-Associated Streptomyces sp. ZZ1956
Source: MDPI journal article supplement (doi:10.3390/antibiotics11111455), 2022-10-22
Supplement: s1 [file s1]

***SUPPLEMENTARY MATERIALS FOR***

**New hygrocins K–U and streptophenylpropanamide A and bioactive compounds from the marine-associated *Streptomyces* sp. ZZ1956**

Wenwen Yi<sup>1</sup>, Asif Wares Newaz<sup>1</sup>, Kuo Yong<sup>1</sup>, Mingzhu Ma<sup>1,2</sup>, Xiao-Yuan Lian<sup>3,\*</sup> and Zhizhen Zhang<sup>1,\*</sup>

<sup>1</sup> Ocean College, Zhoushan Campus, Zhejiang University, Zhoushan 316021, China

<sup>2</sup> Zhejiang Marine Development Research Institute, Zhoushan, 316000, China

<sup>3</sup> College of Pharmaceutical Sciences, Zhejiang University, Hangzhou 310058, China

\*Corresponding Authors.

*Email address:* xylian@zju.edu.cn (X.L.) and zzhang88@zju.edu.cn (Z. Z.); *Tel.:* +86-13675859706 (Z. Z.).

## CONTENT

|                                                                                                                                                                               |    |
|-------------------------------------------------------------------------------------------------------------------------------------------------------------------------------|----|
| Figure S <sub>1</sub> . 16S rDNA sequence of <i>Streptomyces</i> sp. ZZ1956.....                                                                                              | 6  |
| Figure S <sub>2</sub> . Colony of strain ZZ1956 cultured in in Gauze's agar medium.....                                                                                       | 6  |
| Table S <sub>1</sub> . Sequences producing significant alignments.....                                                                                                        | 7  |
| Table S <sub>2</sub> . Crystallographic data and structure refinement parameters of hygrocine C ( <b>1</b> ).....                                                             | 7  |
| Table S <sub>3</sub> . <sup>13</sup> C NMR (150 MHz) and <sup>1</sup> H NMR (600 MHz) data of hygrocine C ( <b>1</b> ).....                                                   | 8  |
| Table S <sub>4</sub> . <sup>13</sup> C NMR data of known compounds <b>2–4</b> (150 MHz, in MeOH- <i>d</i> <sub>4</sub> , $\delta_c$ ).....                                    | 9  |
| Table S <sub>5</sub> . <sup>1</sup> H NMR data of known compounds <b>2–4</b> (600 MHz, in MeOH- <i>d</i> <sub>4</sub> , $\delta_c$ , multi., <i>J</i> in Hz).....             | 10 |
| Table S <sub>6</sub> . <sup>13</sup> C NMR (150 MHz) and <sup>1</sup> H NMR (600 MHz) data of known compound <b>14</b> (in MeOH- <i>d</i> <sub>4</sub> ).....                 | 10 |
| Table S <sub>7</sub> . <sup>13</sup> C NMR (150 MHz) and <sup>1</sup> H NMR (600 MHz) data of known compounds <b>15</b> and <b>16</b> (in MeOH- <i>d</i> <sub>4</sub> ).....  | 11 |
| Table S <sub>8</sub> . <sup>13</sup> C NMR (150 MHz) and <sup>1</sup> H NMR (600 MHz) data of known compounds <b>19</b> and <b>20</b> (in MeOH- <i>d</i> <sub>4</sub> ).....  | 12 |
| Table S <sub>9</sub> . <sup>13</sup> C NMR (150 MHz) and <sup>1</sup> H NMR (600 MHz) data of known compounds <b>21</b> and <b>22</b> (in MeOH- <i>d</i> <sub>4</sub> ).....  | 12 |
| Table S <sub>10</sub> . <sup>13</sup> C NMR (150 MHz) and <sup>1</sup> H NMR (600 MHz) data of known compounds <b>24</b> and <b>25</b> (in MeOH- <i>d</i> <sub>4</sub> )..... | 13 |
| Table S <sub>11</sub> . <sup>13</sup> C NMR data of known compounds <b>26–28</b> (150 MHz, $\delta_c$ ).....                                                                  | 14 |
| Table S <sub>12</sub> . <sup>1</sup> H NMR data of known compounds <b>26–28</b> (600 MHz, $\delta_H$ , multi., <i>J</i> in Hz).....                                           | 15 |
| Table S <sub>13</sub> . <sup>13</sup> C NMR (150 MHz) and <sup>1</sup> H NMR (600 MHz) data of known compound <b>29</b> (in MeOH- <i>d</i> <sub>4</sub> ).....                | 16 |
| Table S <sub>14</sub> . <sup>13</sup> C NMR (150 MHz) and <sup>1</sup> H NMR (600 MHz) data of known compound <b>30</b> (in DMSO- <i>d</i> <sub>6</sub> ).....                | 17 |
| Table S <sub>15</sub> . <sup>1</sup> H NMR data of compound <b>8s</b> and <b>8r</b> (600 MHz, in MeOH- <i>d</i> <sub>4</sub> ) .....                                          | 17 |
| Figures S <sub>3-5</sub> . <sup>1</sup> H NMR spectra of hygrocine K ( <b>5</b> ).....                                                                                        | 18 |
| Figures S <sub>6-8</sub> . <sup>13</sup> C NMR spectra of hygrocine K ( <b>5</b> ).....                                                                                       | 19 |
| Figures S <sub>9-11</sub> . HMQC spectra of hygrocine K ( <b>5</b> ).....                                                                                                     | 21 |
| Figure S <sub>12</sub> . COSY spectrum of hygrocine K ( <b>5</b> ).....                                                                                                       | 22 |
| Figures S <sub>13-15</sub> . HMBC spectra of hygrocine K ( <b>5</b> ).....                                                                                                    | 23 |
| Figure S <sub>16</sub> . NOESY spectrum of hygrocine K ( <b>5</b> ).....                                                                                                      | 24 |
| Figure S <sub>17</sub> . HRESIMS spectrum of hygrocine K ( <b>5</b> ).....                                                                                                    | 25 |
| Figure S <sub>18</sub> . UV spectrum of hygrocine K ( <b>5</b> ).....                                                                                                         | 25 |
| Figure S <sub>19</sub> . IR spectrum of hygrocine K ( <b>5</b> ).....                                                                                                         | 25 |
| Figures S <sub>20-22</sub> . <sup>1</sup> H NMR spectra of hygrocine L ( <b>6</b> ).....                                                                                      | 26 |
| Figures S <sub>23-25</sub> . <sup>13</sup> C NMR spectra of hygrocine L ( <b>6</b> ).....                                                                                     | 27 |

|                                                                                                      |    |
|------------------------------------------------------------------------------------------------------|----|
| Figures S26-28. HMQC spectra of hygrocin L (6).....                                                  | 29 |
| Figure S29. COSY spectrum of hygrocin L (6).....                                                     | 30 |
| Figures S30-32. HMBC spectra of hygrocin L (6).....                                                  | 31 |
| Figure S33. NOESY spectrum of hygrocin L (6).....                                                    | 32 |
| Figure S34. HRESIMS spectrum of hygrocin L (6).....                                                  | 33 |
| Figure S35. UV spectrum of hygrocin L (6).....                                                       | 33 |
| Figure S36. IR spectrum of hygrocin L (6).....                                                       | 33 |
| Figures S37-39. <sup>1</sup> H NMR spectra of hygrocin M (7).....                                    | 34 |
| Figures S40-42. <sup>13</sup> C NMR spectra of hygrocin M (7).....                                   | 35 |
| Figures S43-45. HMQC spectra of hygrocin M (7).....                                                  | 37 |
| Figure S46. COSY spectrum of hygrocin M (7).....                                                     | 38 |
| Figures S47-48. HMBC spectra of hygrocin M (7).....                                                  | 39 |
| Figures S49. NOESY spectrum of hygrocin M (7).....                                                   | 40 |
| Figure S50. HRESIMS spectra of hygrocin M (7).....                                                   | 40 |
| Figure S51. UV spectrum of hygrocin M (7).....                                                       | 40 |
| Figure S52. IR spectrum of hygrocin M (7).....                                                       | 41 |
| Figures S53-55. <sup>1</sup> H NMR spectra of hygrocin N (8).....                                    | 41 |
| Figures S56-58. <sup>13</sup> C NMR spectra of hygrocin N (8).....                                   | 43 |
| Figures S59-61. HMQC spectra of hygrocin N (8).....                                                  | 44 |
| Figure S62. COSY spectrum of hygrocin N (8).....                                                     | 46 |
| Figures S63-64. HMBC spectra of hygrocin N (8).....                                                  | 46 |
| Figure S65. NOESY spectrum of hygrocin N (8).....                                                    | 47 |
| Figure S66. HRESIMS spectrum of hygrocin N (8).....                                                  | 48 |
| Figure S67. UV spectrum of hygrocin N (8).....                                                       | 48 |
| Figure S68. IR spectrum of hygrocin N (8).....                                                       | 49 |
| Figure S69. <sup>1</sup> H NMR spectrum of <b>8s</b> (600 MHz, in MeOH- <i>d</i> <sub>4</sub> )..... | 49 |
| Figure S70. HRESIMS spectrum of <b>8s</b> .....                                                      | 50 |
| Figure S71. <sup>1</sup> H NMR spectrum of <b>8r</b> (600 MHz, in MeOH- <i>d</i> <sub>4</sub> )..... | 50 |
| Figure S72. HRESIMS spectrum of <b>8r</b> .....                                                      | 50 |
| Figures S73-75. <sup>1</sup> H NMR spectra of hygrocin O (9).....                                    | 51 |
| Figures S76-78. <sup>13</sup> C NMR spectra of hygrocin O (9).....                                   | 52 |
| Figures S79-81. HMQC spectra of hygrocin O (9).....                                                  | 54 |
| Figure S82. COSY spectrum of hygrocin O (9).....                                                     | 55 |
| Figures S83-84. HMBC spectra of hygrocin O (9).....                                                  | 56 |
| Figure S85. NOESY spectrum of hygrocin O (9).....                                                    | 57 |
| Figure S86. HRESIMS spectrum of hygrocin O (9).....                                                  | 57 |
| Figure S87. UV spectrum of hygrocin O (9).....                                                       | 58 |

|                                                                       |    |
|-----------------------------------------------------------------------|----|
| Figure S88. IR spectrum of hygrocin O (9).....                        | 58 |
| Figures S89-91. <sup>1</sup> H NMR spectra of hygrocin P (10).....    | 59 |
| Figures S92-94. <sup>13</sup> C NMR spectra of hygrocin P (10).....   | 60 |
| Figures S95-97. HMQC spectra of hygrocin P (10).....                  | 62 |
| Figure S98. COSY spectrum of hygrocin P (10).....                     | 63 |
| Figures S99-100. HMBC spectra of hygrocin P (10).....                 | 64 |
| Figure S101. NOESY spectrum of hygrocin P (10).....                   | 65 |
| Figure S102. HRESIMS spectrum of hygrocin P (10).....                 | 65 |
| Figure S103. UV spectrum of hygrocin P (10).....                      | 66 |
| Figure S104. IR spectrum of hygrocin P (10).....                      | 66 |
| Figures S105-107. <sup>1</sup> H NMR spectra of hygrocin Q (11).....  | 67 |
| Figures S108-110. <sup>13</sup> C NMR spectra of hygrocin Q (11)..... | 68 |
| Figure S111. HMQC spectra of hygrocin Q (11).....                     | 70 |
| Figure S112. COSY spectrum of hygrocin Q (11).....                    | 70 |
| Figures S113-114. HMBC spectra of hygrocin Q (11).....                | 71 |
| Figure S115. NOESY spectrum of hygrocin Q (11).....                   | 72 |
| Figure S116. HRESIMS spectrum of hygrocin Q (11).....                 | 72 |
| Figure S117. UV spectrum of hygrocin Q (11).....                      | 73 |
| Figure S118. IR spectrum of hygrocin Q (11).....                      | 73 |
| Figures S119-121. <sup>1</sup> H NMR spectra of hygrocin R (12).....  | 74 |
| Figures S122-124. <sup>13</sup> C NMR spectra of hygrocin R (12)..... | 75 |
| Figure S125. HMQC spectrum of hygrocin R (12).....                    | 77 |
| Figure S126. COSY spectrum of hygrocin R (12).....                    | 77 |
| Figures S127-128. HMBC spectra of hygrocin R (12).....                | 78 |
| Figure S129. NOESY spectrum of hygrocin R (12).....                   | 79 |
| Figure S130. HRESIMS spectrum of hygrocin R (12).....                 | 79 |
| Figure S131. UV spectrum of hygrocin R (12).....                      | 80 |
| Figure S132. IR spectrum of hygrocin R (12).....                      | 80 |
| Figures S133-135. <sup>1</sup> H NMR spectra of hygrocin S (13).....  | 81 |
| Figures S136-138. <sup>13</sup> C NMR spectra of hygrocin S (13)..... | 82 |
| Figure S139. HMQC spectrum of hygrocin S (13).....                    | 84 |
| Figure S140. COSY spectrum of hygrocin S (13).....                    | 84 |
| Figures S141-142. HMBC spectra of hygrocin S (13).....                | 85 |
| Figure S143. NOESY spectrum of hygrocin S (13).....                   | 86 |
| Figure S144. HRESIMS spectrum of hygrocin S (13).....                 | 86 |
| Figure S145. UV spectrum of hygrocin S (13).....                      | 87 |
| Figure S146. IR spectrum of hygrocin S (13).....                      | 87 |



|                                                                                                                                                                           |     |
|---------------------------------------------------------------------------------------------------------------------------------------------------------------------------|-----|
| Figures S <sub>147-149</sub> . <sup>1</sup> H NMR spectra of hygrocine T ( <b>17</b> ).....                                                                               | 88  |
| Figures S <sub>150-152</sub> . <sup>13</sup> C NMR spectra of hygrocine T ( <b>17</b> ).....                                                                              | 89  |
| Figure S <sub>153</sub> . HMQC spectrum of hygrocine T ( <b>17</b> ).....                                                                                                 | 91  |
| Figure S <sub>154</sub> . COSY spectrum of hygrocine T ( <b>17</b> ).....                                                                                                 | 91  |
| Figures S <sub>155-156</sub> . HMBC spectra of hygrocine T ( <b>17</b> ).....                                                                                             | 92  |
| Figure S <sub>157</sub> . NOESY spectrum of hygrocine T ( <b>17</b> ).....                                                                                                | 93  |
| Figure S <sub>158</sub> . HRESIMS spectrum of hygrocine T ( <b>17</b> ).....                                                                                              | 93  |
| Figure S <sub>159</sub> . UV spectrum of hygrocine T ( <b>17</b> ).....                                                                                                   | 94  |
| Figure S <sub>160</sub> . IR spectrum of hygrocine T ( <b>17</b> ).....                                                                                                   | 94  |
| Figure S <sub>161</sub> . <sup>1</sup> H NMR spectra of hygrocine U ( <b>18</b> ).....                                                                                    | 95  |
| Figure S <sub>162</sub> . <sup>13</sup> C NMR spectra of hygrocine U ( <b>18</b> ).....                                                                                   | 95  |
| Figure S <sub>163</sub> . HMQC spectra of hygrocine U ( <b>18</b> ).....                                                                                                  | 96  |
| Figure S <sub>164</sub> . COSY spectrum of hygrocine U ( <b>18</b> ).....                                                                                                 | 96  |
| Figures S <sub>165-166</sub> . HMBC spectra of hygrocine U ( <b>18</b> ).....                                                                                             | 97  |
| Figure S <sub>167</sub> . HRESIMS spectrum of hygrocine U ( <b>18</b> ).....                                                                                              | 98  |
| Figure S <sub>168</sub> . UV spectrum of hygrocine U ( <b>18</b> ).....                                                                                                   | 98  |
| Figure S <sub>169</sub> . IR spectrum of hygrocine U ( <b>18</b> ).....                                                                                                   | 98  |
| Figures S <sub>170-172</sub> . <sup>1</sup> H NMR spectra of streptobenzenepropanamide A ( <b>23</b> ).....                                                               | 99  |
| Figures S <sub>173-174</sub> . <sup>13</sup> C NMR spectra of streptobenzenepropanamide A ( <b>23</b> ).....                                                              | 100 |
| Figures S <sub>175-176</sub> . HMQC spectra of streptobenzenepropanamide A ( <b>23</b> ).....                                                                             | 101 |
| Figure S <sub>177</sub> . COSY spectrum of streptobenzenepropanamide A ( <b>23</b> ).....                                                                                 | 102 |
| Figures S <sub>178-179</sub> . HMBC spectra of streptobenzenepropanamide A ( <b>23</b> ).....                                                                             | 103 |
| Figure S <sub>180</sub> . HRESIMS spectrum of streptobenzenepropanamide A ( <b>23</b> ).....                                                                              | 104 |
| Figure S <sub>181</sub> . UV spectrum of streptobenzenepropanamide A ( <b>23</b> ).....                                                                                   | 104 |
| Figure S <sub>182</sub> . IR spectrum of streptobenzenepropanamide A ( <b>23</b> ).....                                                                                   | 104 |
| Table S <sub>16</sub> . Gibbs free energies and equilibrium populations of low-energy conformers of <i>R</i> - <b>23</b> .....                                            | 105 |
| Table S <sub>17</sub> . Cartesian coordinates for the low-energy reoptimized MMFF conformers of <i>R</i> - <b>23</b> at B3LYP/6-311+G (d, p) level of theory in MeOH..... | 105 |
| Table S <sub>18</sub> . Gibbs free energies and optical rotation of low-energy conformers of <i>S</i> - <b>23</b> .....                                                   | 109 |
| Table S <sub>19</sub> . Cartesian coordinates for the low-energy reoptimized MMFF conformers of <i>S</i> - <b>23</b> at B3LYP/6-311+G (d, p) level of theory in MeOH..... | 109 |

Figure S1. 16S rDNA sequence of *Streptomyces* sp. ZZ1956

CTTACCATGCAGTCGAACGATGAACCGGTTTCGGCCGGGGATTAGTGGCGAACGGGTG  
AGTAACACGTGGGCAATCTGCCCTGCACTCTGGGACAAGCCCTGGAAACGGGGTCTAA  
TACCGGATATGACGCGTTCCCGCATGGGATACGTGTGGAAAGCTCCGGCGGTGCAGGA  
TGAGCCCCGCGCCTATCAGCTTGTTGGTGGGGTGATGGCCTACCAAGGCGACGACGGG  
TAGCCGGCCTGAGAGGGCGACCGGCCACACTGGGACTGAGACACGGCCCAGACTCCT  
ACGGGAGGCAGCAGTGGGGAATATTGCACAATGGGCGCAAGCCTGATGCAGCGACGC  
CGCGTGAGGGATGACGGCCTTCGGGTTGTAAACCTCTTTCAGCAGGGAAGAAGCGTG  
AGTGACGGTACCTGCAGAAGAAGCGCCGGCTAACTACGTGCCAGCAGCCGCGGTAATA  
CGTAGGGCGCAAGCGTTGTCCGGAATTATTGGGCGTAAAGAGCTCGTAGGCGGCTTGT  
CGCGTCGGATGTGAAAGCCCCGGGGCTTAACTCCGGGTCTGCATTCGATACGGGCAGGC  
TAGAGTTCGGTAGGGGAGATCGGAATTCCTGGTGTAGCGGTGAAATGCGCAGATATCA  
GGAGGAACACCGGTGGGCGAAGGCGGATCTCTGGGCCGATACTGACGCTGAGGAGCG  
AAAGCGTGGGGAGCGAACAGGATTAGATACCCTGGTAGTCCACGCCGTAAACGTTGGG  
AACTAGGTGTGGGCGACATTCCACGTTGTCCGTGCCGCAGCTAACGCATTAAGTCCCC  
GCCTGGGGAGTACGGCCGCAAGGCTAAACTCAAAGGAATTGACGGGGGGCCCGCACA  
AGCGGCGGAGCATGTGGCTTAATTCGACGCAACGCGAAGAACCTTACCAAGGCTTGAC  
ATACATCGGAAACATCCAGAGATGGGTGCCCCCTTGTGGTTCGGTGTACAGGTGGTGCAT  
GGCTGTCTGTCAGCTCGTGTCTGTGAGATGTTGGGTAAAGTCCCGCAACGAGCGCAACCC  
TTGTCCTGTGTTGCCAGCGGGTTATGCCGGGGACTCACAGGAGACTGCCGGGGTCAAC  
TCGGAGGAAGGTGGGGACGACGTCAAGTCATCATGCCCCCTTATGTCTTGGGCTGCACA  
CGTGCTACAATGGCCGGTACAATGAGCTGCGAAGCCGTGAGGTGGAGCGAATCTCAAA  
AAGCCGGTCTCAGTTCGGATTGGGGTCTGCAACTCGACCCCATGAAGTCGGAGTCGCT  
AGTAATCGCAGATCAGCATTGCTGCGGTGAATACGTTCCCGGGCCTTGTACACACCGCC  
CGTCACGTCACGAAAGTCGGTAACACCCGAAGCCGGTGGCCCAACCCTTGTGGAGGG  
AGCCGTCGAAGGGA (1403 bp).

Figure S2. Colony of strain ZZ1956 cultured in Gauze's agar medium

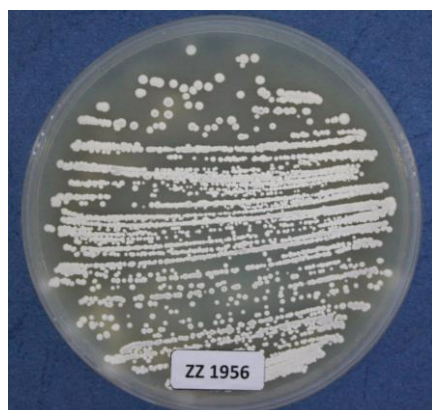

Table S<sub>1</sub>. Sequences producing significant alignments

| Accession  | Description                                                               | Max score | Total score | Query coverage | E value | Ident  |
|------------|---------------------------------------------------------------------------|-----------|-------------|----------------|---------|--------|
| EU603353.1 | <i>Streptomyces</i> sp. MJM4686 16S ribosomal RNA gene                    | 2575      | 2575        | 99%            | 0.0     | 99.86% |
| KY213669.1 | <i>Streptomyces</i> sp. strain T17 16S ribosomal RNA gene                 | 2571      | 2571        | 99%            | 0.0     | 99.86% |
| MN400077.1 | <i>Streptomyces</i> sp. strain H4 16S ribosomal RNA gene                  | 2569      | 2569        | 99%            | 0.0     | 99.79% |
| FJ532411.1 | <i>Streptomyces malaysiensis</i> strain HBUM175125 16S ribosomal RNA gene | 2564      | 2564        | 99%            | 0.0     | 99.79% |
| CP029823.1 | <i>Streptomyces malaysiensis</i> strain DSM 4137 chromosome               | 2562      | 15247       | 99%            | 0.0     | 99.64% |
| KY213677.1 | <i>Streptomyces malaysiensis</i> strain T44 16S ribosomal RNA gene        | 2562      | 2562        | 99%            | 0.0     | 99.64% |

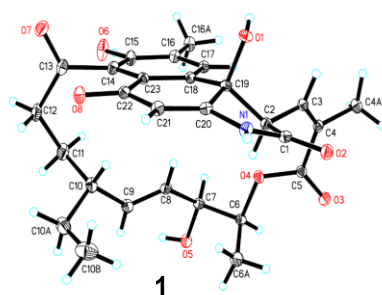Table S<sub>2</sub>. Crystallographic data and structure refinement parameters of hygrocin C (**1**)

|                                    |                                                 |                                             |                                                               |
|------------------------------------|-------------------------------------------------|---------------------------------------------|---------------------------------------------------------------|
| Empirical formula                  | C <sub>28</sub> H <sub>31</sub> NO <sub>8</sub> | F(000)                                      | 540.0                                                         |
| Formula weight                     | 509.54                                          | Crystal size/mm <sup>3</sup>                | 0.13 × 0.12 × 0.1                                             |
| Temperature/K                      | 100.0(3)                                        | Radiation                                   | Cu Kα (λ = 1.54184)                                           |
| Crystal system                     | monoclinic                                      | 2θ range for data collection/°              | 6.548 to 146.924                                              |
| Space group                        | P2 <sub>1</sub>                                 | Index ranges                                | -11 ≤ h ≤ 9, -12 ≤ k ≤ 12, -16 ≤ l ≤ 16                       |
| a/Å                                | 9.5820(7)                                       | Reflections collected                       | 8536                                                          |
| b/Å                                | 9.9202(6)                                       | Independent reflections                     | 4619 [R <sub>int</sub> = 0.0295, R <sub>sigma</sub> = 0.0299] |
| c/Å                                | 13.4974(8)                                      | Data/restraints/parameters                  | 4619/1/341                                                    |
| α/°                                | 90                                              | Goodness-of-fit on F <sup>2</sup>           | 1.047                                                         |
| β/°                                | 90.04(4)                                        | Final R indexes [I ≥ 2σ (I)]                | R <sub>1</sub> = 0.0356, wR <sub>2</sub> = 0.0922             |
| γ/°                                | 90                                              | Final R indexes [all data]                  | R <sub>1</sub> = 0.0359, wR <sub>2</sub> = 0.0927             |
| Volume/Å <sup>3</sup>              | 1283.00(14)                                     | Largest diff. peak/hole / e Å <sup>-3</sup> | 0.18/-0.23                                                    |
| Z                                  | 2                                               | Flack/Hooft parameter                       | 0.00(9)/0.03(7)                                               |
| ρ <sub>calc</sub> /cm <sup>3</sup> | 1.319                                           | F(000)                                      | 540.0                                                         |
| μ/mm <sup>-1</sup>                 | 0.802                                           | Crystal size/mm <sup>3</sup>                | 0.13 × 0.12 × 0.1                                             |

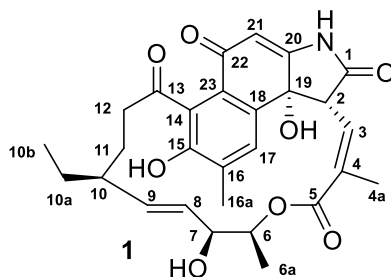

Table S3.  $^{13}\text{C}$  NMR (150 MHz) and  $^1\text{H}$  NMR (600 MHz) data of hygrocinn C (**1**)

| No. | <b>1<sup>a</sup></b>       |                                                            | <b>1<sup>b</sup></b>       |                                                |
|-----|----------------------------|------------------------------------------------------------|----------------------------|------------------------------------------------|
|     | $\delta_{\text{C}}$ , type | $\delta_{\text{H}}$ , multi. ( <i>J</i> in Hz)             | $\delta_{\text{C}}$ , type | $\delta_{\text{H}}$ , multi. ( <i>J</i> in Hz) |
| 1   | 174.3, C                   | —                                                          | 177.5, C                   | —                                              |
| 2   | 53.5, CH                   | 4.65, d (10.6)                                             | 55.2, CH                   | 4.60, d (10.7)                                 |
| 3   | 130.0, CH                  | 6.57, dd (10.6, 1.3)                                       | 131.2, CH                  | 6.54, dd (10.7, 1.4)                           |
| 4   | 135.1, C                   | —                                                          | 137.0, C                   | —                                              |
| 4a  | 21.1, CH <sub>3</sub>      | 2.19, d (1.3)                                              | 22.2, CH <sub>3</sub>      | 2.20, d (1.4)                                  |
| 5   | 166.4, C                   | —                                                          | 168.3, C                   | —                                              |
| 6   | 73.6, CH                   | 4.86, qd (6.4, 4.0)                                        | 75.3, CH                   | 4.81, qd (6.4, 4.0)                            |
| 6a  | 13.1, CH <sub>3</sub>      | 1.03, d (6.4)                                              | 14.4, CH <sub>3</sub>      | 1.03, d (6.4)                                  |
| 7   | 70.0, CH                   | 3.93, dd (5.6, 3.3)                                        | 71.9, CH                   | 3.87, td (5.7, 3.9)                            |
| 8   | 127.4, CH                  | 4.18, dd (15.3, 3.3)                                       | 128.3, CH                  | 4.14, dd (15.2, 3.9)                           |
| 9   | 135.2, CH                  | 5.25, ddd (15.3, 9.6, 1.8)                                 | 137.3, CH                  | 5.24, ddd (15.2, 9.2, 1.8)                     |
| 10  | 44.8, CH                   | 1.43, m                                                    | 45.8, CH                   | 1.37–1.40, m                                   |
| 10a | 26.0, CH <sub>2</sub>      | 1.45, m; 0.90, m                                           | 27.1, CH <sub>2</sub>      | 1.46, m; 0.93, m                               |
| 10b | 12.1, CH <sub>3</sub>      | 0.62, t (7.1)                                              | 13.2, CH <sub>3</sub>      | 0.66, t (7.4)                                  |
| 11  | 30.4, CH <sub>2</sub>      | 1.40, m                                                    | 31.6, CH <sub>2</sub>      | 1.37–1.40, m                                   |
| 12  | 39.6, CH <sub>2</sub>      | 2.83, ddd (17.3, 11.4, 2.0);<br>2.48, ddd (17.3, 6.6, 2.0) | 40.6, CH <sub>2</sub>      | 2.89, dd (17.6, 11.5);<br>2.60, dd (17.6, 6.1) |
| 13  | 206.3, C                   | —                                                          | 212.5, C                   | —                                              |
| 14  | 128.2, C                   | —                                                          | 129.9, C                   | —                                              |
| 15  | 152.3, C                   | —                                                          | 153.7, C                   | —                                              |
| 16  | 130.5, C                   | —                                                          | 132.7, C                   | —                                              |
| 16a | 15.9, CH <sub>3</sub>      | 2.25, s                                                    | 17.1, CH <sub>3</sub>      | 2.22, s                                        |
| 17  | 129.7, CH                  | 7.48, s                                                    | 131.1, CH                  | 7.41, s                                        |
| 18  | 132.8, C                   | —                                                          | 134.3, C                   | —                                              |
| 19  | 72.6, C                    | —                                                          | 73.9, C                    | —                                              |
| 20  | 161.6, C                   | —                                                          | 164.0, C                   | —                                              |
| 21  | 102.9, CH                  | 5.82, s                                                    | 104.1, CH                  | 5.81, s                                        |
| 22  | 183.0, C                   | —                                                          | 185.6, C                   | —                                              |
| 23  | 129.3, C                   | —                                                          | 130.2, C                   | —                                              |

<sup>a,b</sup> The data were recorded in acetone-*d*<sub>6</sub> and MeOH-*d*<sub>4</sub>, respectively.

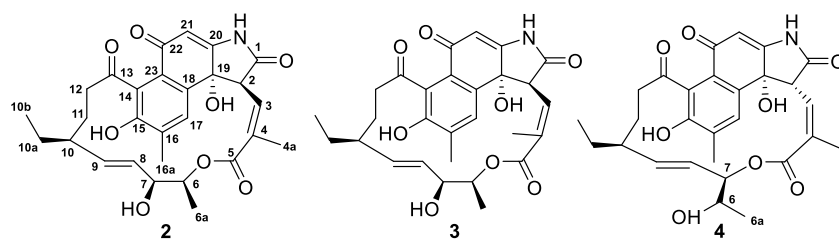

Table S4.  $^{13}\text{C}$  NMR data of known compounds **2–4** (150 MHz, in  $\text{MeOH-}d_4$ ,  $\delta_{\text{C}}$ )

| No. | <b>2</b>            | <b>3</b>            | <b>4</b>            |
|-----|---------------------|---------------------|---------------------|
| 1   | 177.3, C            | 176.9, C            | 178.6, C            |
| 2   | 56.1, CH            | 55.6, CH            | 56.3, CH            |
| 3   | 132.8, CH           | 133.0, CH           | 131.8, CH           |
| 4   | 135.5, C            | 134.6, C            | 137.3, C            |
| 4a  | 21.6, $\text{CH}_3$ | 13.6, $\text{CH}_3$ | 21.8, $\text{CH}_3$ |
| 5   | 168.7, C            | 167.4, C            | 168.1, C            |
| 6   | 76.2, CH            | 74.5, CH            | 67.4, CH            |
| 6a  | 13.8, $\text{CH}_3$ | 13.2, $\text{CH}_3$ | 17.1, $\text{CH}_3$ |
| 7   | 71.7, CH            | 71.8, CH            | 79.1, CH            |
| 8   | 128.1, CH           | 128.3, CH           | 125.9, CH           |
| 9   | 137.9, CH           | 136.4, CH           | 138.6, CH           |
| 10  | 44.2, CH            | 43.2, CH            | 42.5, CH            |
| 10a | 29.7, $\text{CH}_2$ | 27.8, $\text{CH}_2$ | 29.1, $\text{CH}_2$ |
| 10b | 12.8, $\text{CH}_3$ | 11.2, $\text{CH}_3$ | 11.9, $\text{CH}_3$ |
| 11  | 35.0, $\text{CH}_2$ | 31.6, $\text{CH}_2$ | 31.4, $\text{CH}_2$ |
| 12  | 42.9, $\text{CH}_2$ | 42.1, $\text{CH}_2$ | 43.9, $\text{CH}_2$ |
| 13  | 212.1, C            | 212.0, C            | 212.1, C            |
| 14  | 128.6, C            | 129.8, C            | 126.8, C            |
| 15  | 153.6, C            | 153.0, C            | 153.3, C            |
| 16  | 133.3, C            | 133.7, C            | 133.4, C            |
| 16a | 17.1, $\text{CH}_3$ | 17.0, $\text{CH}_3$ | 17.1, $\text{CH}_3$ |
| 17  | 130.5, CH           | 132.0, CH           | 132.2, CH           |
| 18  | 134.4, C            | 133.0, C            | 134.7, C            |
| 19  | 73.8, C             | 75.3, C             | 75.1, C             |
| 20  | 164.6, C            | 164.7, C            | 164.7, C            |
| 21  | 103.7, CH           | 104.5, CH           | 104.1, CH           |
| 22  | 185.7, C            | 185.8, C            | 185.8, C            |
| 23  | 129.5, C            | 130.7, C            | 130.2, C            |

Table S5.  $^1\text{H}$  NMR data of known compounds **2–4** (600 MHz, in  $\text{MeOH-}d_4$ ,  $\delta_{\text{H}}$ , multi.,  $J$  in Hz)

| No. | <b>2</b>                                                   | <b>3</b>                   | <b>4</b>                                                  |
|-----|------------------------------------------------------------|----------------------------|-----------------------------------------------------------|
| 2   | 4.22, d (10.8)                                             | 4.06, d (9.2)              | 4.94, d (10.1)                                            |
| 3   | 6.45, d (10.8)                                             | 5.89, dd (9.2, 1.3)        | 6.53, d (10.1)                                            |
| 4a  | 2.19, s                                                    | 2.09, d (1.3)              | 2.19, s                                                   |
| 6   | 4.79, qd (6.1, 3.5)                                        | 4.67, qd (6.2, 4.3)        | 3.90, dq (6.2, 4.1)                                       |
| 6a  | 0.95 d (6.1)                                               | 0.93, d (6.2)              | 0.99, d (6.2)                                             |
| 7   | 3.96, d (1.4)                                              | 4.09, m                    | 5.07, t (4.6)                                             |
| 8   | 3.84, d (15.3)                                             | 4.92, ddd (15.6, 3.2, 1.0) | 4.28, dd (16.1, 5.0)                                      |
| 9   | 5.18, ddd (15.3, 9.7, 2.1)                                 | 5.51, ddd (15.6, 7.3, 1.8) | 5.21, dd (16.1, 7.2)                                      |
| 10  | 1.53, 1H, m                                                | 1.83, m                    | 1.53, m                                                   |
| 10a | 1.33, m; 1.08, m                                           | 1.45, m; 1.26, m           | 1.38, m; 1.10, m                                          |
| 10b | 0.72, t (7.4)                                              | 0.78, t (7.4)              | 0.75, t (7.3)                                             |
| 11  | 1.76, m; 1.36, m                                           | 1.53, m; 1.29, m           | 1.54, m; 1.40, m                                          |
| 12  | 2.62, ddd (15.2, 11.9, 2.4);<br>2.46, ddd (15.2, 9.6, 2.4) | 2.79, m; 2.48, m           | 2.84, ddd (16.2, 8.8, 2.3);<br>2.44, ddd (16.2, 8.8, 2.3) |
| 16a | 2.28, s                                                    | 2.30, s                    | 2.23, s                                                   |
| 17  | 7.54, s                                                    | 7.25, s                    | 7.36, s                                                   |
| 21  | 5.79, s                                                    | 5.85, s                    | 5.80, s                                                   |

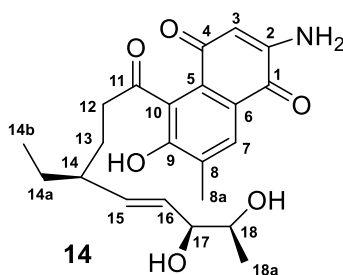Table S6.  $^{13}\text{C}$  NMR (150 MHz) and  $^1\text{H}$  NMR (600 MHz) data of known compound **14** (in  $\text{MeOH-}d_4$ )

| No. | $\delta_{\text{C}}$ , type | $\delta_{\text{H}}$ , multi. ( $J$ in Hz) | No. | $\delta_{\text{C}}$ , type | $\delta_{\text{H}}$ , multi. ( $J$ in Hz) |
|-----|----------------------------|-------------------------------------------|-----|----------------------------|-------------------------------------------|
| 1   | 181.3, C                   | –                                         | 11  | 209.8, C                   | –                                         |
| 2   | 153.1, C                   | –                                         | 12  | 42.8, $\text{CH}_2$        | 2.68, m                                   |
| 3   | 102.1, CH                  | 5.71, s                                   | 13  | 29.8, $\text{CH}_2$        | 1.65, m; 1.46, m                          |
| 4   | 185.5, C                   | –                                         | 14  | 45.3, CH                   | 1.96, m                                   |
| 5   | 131.7, C                   | –                                         | 14a | 29.3, $\text{CH}_2$        | 1.91, m; 1.31, m                          |
| 6   | 131.1, C                   | –                                         | 14b | 12.3, $\text{CH}_3$        | 0.90, t (7.3)                             |
| 7   | 131.2, CH                  | 7.81, s                                   | 15  | 138.6, CH                  | 5.45, m                                   |
| 8   | 132.6, C                   | –                                         | 16  | 131.7, CH                  | 5.45, m                                   |
| 8a  | 16.9, $\text{CH}_3$        | 2.29, s                                   | 17  | 78.7, CH                   | 3.76, m                                   |
| 9   | 160.4, C                   | –                                         | 18  | 72.0, CH                   | 3.53, m                                   |
| 10  | 123.5, C                   | –                                         | 18a | 19.3, $\text{CH}_3$        | 1.05, d (6.1)                             |

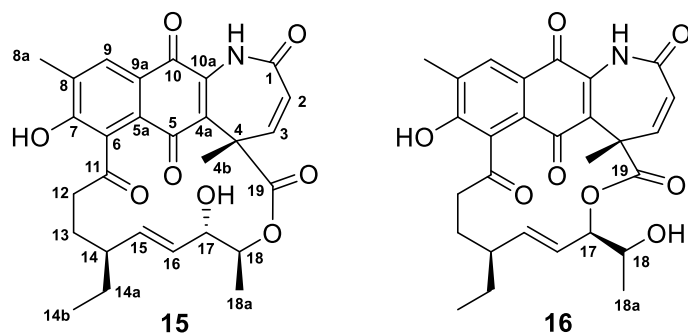

Table S7.  $^{13}\text{C}$  NMR (150 MHz) and  $^1\text{H}$  NMR (600 MHz) data of known compounds **15** and **16** (in  $\text{MeOH-}d_4$ )

| No. | <b>15</b>                  |                                           | <b>16</b>                  |                                           |
|-----|----------------------------|-------------------------------------------|----------------------------|-------------------------------------------|
|     | $\delta_{\text{C}}$ , type | $\delta_{\text{H}}$ , multi. ( $J$ in Hz) | $\delta_{\text{C}}$ , type | $\delta_{\text{H}}$ , multi. ( $J$ in Hz) |
| 1   | 166.4, C                   | —                                         | 166.7, C                   | —                                         |
| 2   | 123.2, CH                  | 6.01, d (12.3)                            | 123.9, C                   | 6.03, dd (12.1, 3.0)                      |
| 3   | 146.4, CH                  | 6.17, d (12.3)                            | 147.6, CH                  | 6.48, dd (12.1, 3.0)                      |
| 4   | 52.6, C                    | —                                         | 51.2, C                    | —                                         |
| 4a  | 131.8, C                   | —                                         | 131.3, C                   | —                                         |
| 4b  | 26.0, $\text{CH}_3$        | 1.57, s                                   | 24.4, $\text{CH}_3$        | 1.51, s                                   |
| 5   | 185.1, C                   | —                                         | 184.0, C                   | —                                         |
| 5a  | 126.4, C                   | —                                         | 126.3, C                   | —                                         |
| 6   | 123.4, C                   | —                                         | 123.3, C                   | —                                         |
| 7   | 159.3, C                   | —                                         | 159.2, C                   | —                                         |
| 8   | 133.2, C                   | —                                         | 133.6, C                   | —                                         |
| 8a  | 17.1, $\text{CH}_3$        | 2.34, s                                   | 17.1, $\text{CH}_3$        | 2.34, s                                   |
| 9   | 131.9, CH                  | 7.96, s                                   | 131.7, CH                  | 7.95, s                                   |
| 9a  | 130.3, C                   | —                                         | 130.4, C                   | —                                         |
| 10  | 179.8, C                   | —                                         | 179.8, C                   | —                                         |
| 10a | 137.1, C                   | —                                         | 137.9, C                   | —                                         |
| 11  | 208.8, C                   | —                                         | 207.5, C                   | —                                         |
| 12  | 41.7, $\text{CH}_2$        | 2.78, m; 2.73, m                          | 41.7, $\text{CH}_2$        | 2.67, m; 2.35, m                          |
| 13  | 29.8, $\text{CH}_2$        | 1.98, m; 1.50, m                          | 38.6, $\text{CH}_2$        | 2.40, m; 1.39, m                          |
| 14  | 44.7, CH                   | 1.98, m                                   | 45.5, CH                   | 2.89, m                                   |
| 14a | 28.4, $\text{CH}_2$        | 1.49, m; 1.27, m                          | 25.3, $\text{CH}_2$        | 1.40, m; 1.29, m                          |
| 14b | 12.2, $\text{CH}_3$        | 0.79, t (7.3)                             | 12.6, $\text{CH}_3$        | 0.89, t (7.3)                             |
| 15  | 136.9, CH                  | 5.28, dd (15.8, 6.8)                      | 142.8, CH                  | 5.97, dd (15.5, 6.8)                      |
| 16  | 132.7, CH                  | 5.24, dd (15.8, 6.2)                      | 125.8, CH                  | 5.36, m                                   |
| 17  | 74.9, CH                   | 3.98, dd (6.3, 3.5)                       | 80.8, CH                   | 5.36, m                                   |
| 18  | 76.8, CH                   | 4.86, m                                   | 69.7, CH                   | 3.79, m                                   |
| 18a | 16.8, $\text{CH}_3$        | 1.29, d (7.3)                             | 20.3, $\text{CH}_3$        | 1.12, dd (6.5)                            |
| 19  | 174.4, C                   | —                                         | 174.6, C                   | —                                         |

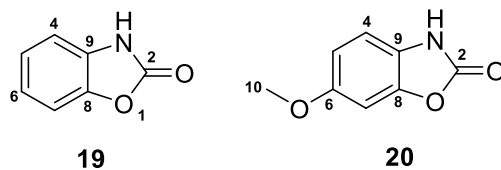

Table S<sub>8</sub>. <sup>13</sup>C NMR (150 MHz) and <sup>1</sup>H NMR (600 MHz) data of known compounds **19** and **20** (in DMSO-*d*<sub>6</sub>)

| No. | <b>19</b>         |                                       | <b>20</b>             |                                       |
|-----|-------------------|---------------------------------------|-----------------------|---------------------------------------|
|     | $\delta_C$ , type | $\delta_H$ , multi. ( <i>J</i> in Hz) | $\delta_C$ , type     | $\delta_H$ , multi. ( <i>J</i> in Hz) |
| 2   | 155.7, C          | —                                     | 154.9, C              | —                                     |
| 4   | 109.9, CH         | 7.07, d (7.8)                         | 109.8, CH             | 6.98, dd (7.8, 2.7)                   |
| 5   | 123.3, CH         | 7.12, t (7.8)                         | 128.9, CH             | 6.69, td (7.8, 2.7)                   |
| 6   | 121.0, CH         | 7.05, t (7.8)                         | 155.5, C              | —                                     |
| 7   | 109.0, CH         | 7.26, d (7.8)                         | 96.8, CH              | 6.96, d (2.7)                         |
| 8   | 143.9, C          | —                                     | 144.3, C              | —                                     |
| 9   | 132.5, C          | —                                     | 124.9, C              | —                                     |
| 10  | —                 | —                                     | 56.8, CH <sub>3</sub> | 3.73, s                               |

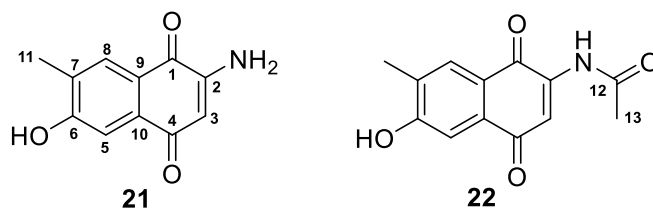

Table S<sub>9</sub>. <sup>13</sup>C NMR (150 MHz) and <sup>1</sup>H NMR (600 MHz) data of known compounds **21** and **22** (in DMSO-*d*<sub>6</sub>)

| No.  | <b>21</b>             |                                       | <b>22</b>             |                                       |
|------|-----------------------|---------------------------------------|-----------------------|---------------------------------------|
|      | $\delta_C$ , type     | $\delta_H$ , multi. ( <i>J</i> in Hz) | $\delta_C$ , type     | $\delta_H$ , multi. ( <i>J</i> in Hz) |
| 1    | 180.5, C              | —                                     | 179.0, C              | —                                     |
| 2    | 150.7, C              | —                                     | 141.4, C              | —                                     |
| 3    | 101.4, CH             | 5.67, s                               | 115.3, CH             | 7.53, s                               |
| 4    | 181.9, C              | —                                     | 185.4, C              | —                                     |
| 5    | 110.8, CH             | 7.26, s                               | 110.7, CH             | 7.27, s                               |
| 6    | 161.9, C              | —                                     | 162.4, C              | —                                     |
| 7    | 128.2, C              | —                                     | 130.4, C              | —                                     |
| 8    | 129.1, CH             | 7.69, s                               | 129.5, CH             | 7.77, s                               |
| 9    | 122.0, C              | —                                     | 121.4, C              | —                                     |
| 10   | 134.0, C              | —                                     | 131.9, C              | —                                     |
| 11   | 15.8, CH <sub>3</sub> | 2.19, s                               | 16.0, CH <sub>3</sub> | 2.22, s                               |
| 12   | —                     | —                                     | 171.2, C              | —                                     |
| 13   | —                     | —                                     | 24.6, CH <sub>3</sub> | 2.22, s                               |
| OH-6 | —                     | 10.92, s                              | —                     | 9.70, s                               |



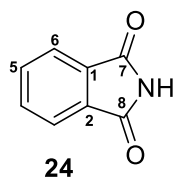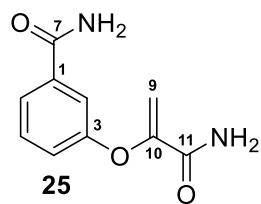

Table S<sub>10</sub>. <sup>13</sup>C NMR (150 MHz) and <sup>1</sup>H NMR (600 MHz) data of known compounds **24** and **25** (in MeOH-*d*<sub>4</sub>)

| No. | <b>24</b>                  |                                                | <b>25</b>                  |                                                |
|-----|----------------------------|------------------------------------------------|----------------------------|------------------------------------------------|
|     | $\delta_{\text{C}}$ , type | $\delta_{\text{H}}$ , multi. ( <i>J</i> in Hz) | $\delta_{\text{C}}$ , type | $\delta_{\text{H}}$ , multi. ( <i>J</i> in Hz) |
| 1   | 134.5, C                   | —                                              | 137.3, C                   | —                                              |
| 2   | 134.5, C                   | —                                              | 120.7, CH                  | 7.63, t (2.0)                                  |
| 3   | 124.2, CH                  | 7.83, m                                        | 156.7, C                   | —                                              |
| 4   | 135.3, CH                  | 7.80, m                                        | 124.8, CH                  | 7.30, dd (8.0, 2.0)                            |
| 5   | 135.3, CH                  | 7.80, m                                        | 131.4, CH                  | 7.50, t (8.0)                                  |
| 6   | 124.2, CH                  | 7.83, m                                        | 125.2, CH                  | 7.71, td (8.0, 2.0)                            |
| 7   | 171.2, C                   | —                                              | 171.3, C                   | —                                              |
| 8   | 171.2, C                   | —                                              | —                          | —                                              |
| 9   | —                          | —                                              | 99.5, CH <sub>2</sub>      | 5.57, d (2.3); 4.59, d (2.3)                   |
| 10  | —                          | —                                              | 155.5, C                   | —                                              |
| 11  | —                          | —                                              | 166.7, C                   | —                                              |

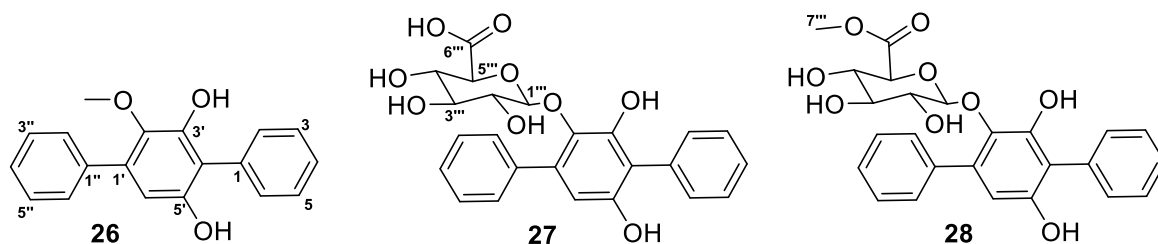

Table S11.  $^{13}\text{C}$  NMR data of known compounds **26–28** (150 MHz,  $\delta_{\text{C}}$ )

| No.                  | <b>26</b> <sup>a</sup> | <b>27</b> <sup>b</sup> | <b>28</b> <sup>b</sup> |
|----------------------|------------------------|------------------------|------------------------|
| 1                    | 133.0, C               | 135.8, C               | 135.8, C               |
| 2                    | 130.9, CH              | 132.3, CH              | 132.3, CH              |
| 3                    | 127.3, CH              | 128.9, CH              | 128.8, CH              |
| 4                    | 126.1, CH              | 127.8, CH              | 127.8, CH              |
| 5                    | 127.3, CH              | 128.9, CH              | 128.8, CH              |
| 6                    | 130.9, CH              | 132.3, CH              | 132.3, CH              |
| 1'                   | 134.7, C               | 136.8, C               | 136.8, C               |
| 2'                   | 137.8, C               | 137.4, C               | 137.5, C               |
| 3'                   | 148.2, C               | 149.6, C               | 149.5, C               |
| 4'                   | 116.2, C               | 118.2, C               | 118.1, C               |
| 5'                   | 151.1, C               | 153.0, C               | 153.1, C               |
| 6'                   | 106.9, CH              | 109.1, CH              | 109.0, CH              |
| OCH <sub>3</sub> -2' | 60.3, CH <sub>3</sub>  | —                      | —                      |
| 1''                  | 138.2, C               | 139.8, C               | 140.0, C               |
| 2''                  | 128.4, CH              | 130.8, CH              | 130.8, CH              |
| 3''                  | 128.3, CH              | 128.8, CH              | 128.7, CH              |
| 4''                  | 127.1, CH              | 128.2, CH              | 128.0, CH              |
| 5''                  | 128.3, CH              | 128.8, CH              | 128.7, CH              |
| 6''                  | 128.4, CH              | 130.8, CH              | 130.8, CH              |
| 1'''                 | —                      | 107.6, CH              | 108.0, CH              |
| 2'''                 | —                      | 75.0, CH               | 75.0, CH               |
| 3'''                 | —                      | 77.1, CH               | 77.2, CH               |
| 4'''                 | —                      | 72.9, CH               | 72.8, CH               |
| 5'''                 | —                      | 77.3, CH               | 77.2, CH               |
| 6'''                 | —                      | 171.9, C               | 170.5, C               |
| 7'''                 | —                      | —                      | 52.9, CH <sub>3</sub>  |

<sup>a,b</sup> The data were recorded in DMSO-*d*<sub>6</sub> and MeOH-*d*<sub>4</sub>, respectively.

Table S12. <sup>1</sup>H NMR data of known compounds **26–28** (600 MHz,  $\delta_{\text{H}}$ , multi., *J* in Hz)

| No.                  | <b>26<sup>a</sup></b> | <b>27<sup>b</sup></b> | <b>28<sup>b</sup></b> |
|----------------------|-----------------------|-----------------------|-----------------------|
| 2                    | 7.35, d (7.7)         | 7.41, d (7.5)         | 7.41, d (7.5)         |
| 3                    | 7.35, t (7.7)         | 7.36, t (7.5)         | 7.36, t (7.5)         |
| 4                    | 7.24, t (7.7)         | 7.26, t (7.5)         | 7.26, t (7.3)         |
| 5                    | 7.35, t (7.7)         | 7.36, t (7.5)         | 7.36, t (7.5)         |
| 6                    | 7.35, d (7.7)         | 7.41, d (7.5)         | 7.41, d (7.5)         |
| 6'                   | 6.37, s               | 6.38, s               | 6.37, s               |
| OCH <sub>3</sub> -2' | 3.27, s               | —                     | —                     |
| 2''                  | 7.53, d (7.4)         | 7.48, d (7.3)         | 7.44, d (7.3)         |
| 3''                  | 7.44, t (7.4)         | 7.32, t (7.3)         | 7.30, t (7.3)         |
| 4''                  | 7.35, t (7.4)         | 7.26, t (7.3)         | 7.26, t (7.3)         |
| 5''                  | 7.44, t (7.4)         | 7.32, t (7.3)         | 7.30, t (7.3)         |
| 6''                  | 7.53, d (7.4)         | 7.48, d (7.3)         | 7.44, d (7.3)         |
| 1'''                 | —                     | 4.36, d (7.8)         | 4.33, d (7.8)         |
| 2'''                 | —                     | 3.36, t (9.2)         | 3.36, dd (9.2, 7.8)   |
| 3'''                 | —                     | 3.25, t (9.2)         | 3.24, t (9.2)         |
| 4'''                 | —                     | 3.44, t (9.2)         | 3.41, t (9.2)         |
| 5'''                 | —                     | 3.52, d (9.8)         | 3.51, d (9.8)         |
| 7'''                 | —                     | —                     | 3.65, s               |
| OH-3'                | 9.08, s               | —                     | —                     |
| OH-5'                | 8.59, s               | —                     | —                     |

<sup>a,b</sup> The data were recorded in DMSO-*d*<sub>6</sub> and MeOH-*d*<sub>4</sub>, respectively.

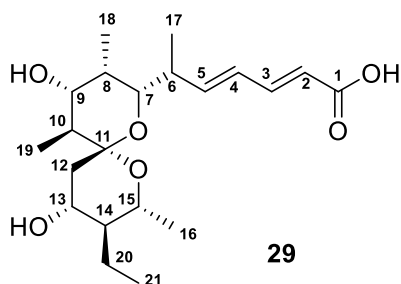

Table S<sub>13</sub>. <sup>13</sup>C NMR (150 MHz) and <sup>1</sup>H NMR (600 MHz) data of known compound **29** (in MeOH-*d*<sub>4</sub>)

| No. | $\delta_C$ , type | $\delta_H$ , multi. ( <i>J</i> in Hz) | No. | $\delta_C$ , type     | $\delta_H$ , multi. ( <i>J</i> in Hz)      |
|-----|-------------------|---------------------------------------|-----|-----------------------|--------------------------------------------|
| 1   | 170.8, C          | —                                     | 12  | 37.9, CH <sub>2</sub> | 2.26, dd (15.1, 6.0); 1.61, dd (15.1, 1.8) |
| 2   | 120.8, CH         | 5.75, d (15.1)                        | 13  | 69.9, CH              | 3.56, td (6.0, 1.8)                        |
| 3   | 147.3, CH         | 7.20, dd (15.1, 10.7)                 | 14  | 52.3, CH              | 1.48, m                                    |
| 4   | 129.6, CH         | 6.18, dd (15.1, 10.7)                 | 15  | 77.9, CH              | 3.39, qd (10.6, 5.9)                       |
| 5   | 149.7, CH         | 6.07, dd (15.1, 9.1)                  | 16  | 19.9, CH <sub>3</sub> | 1.15, d (5.9)                              |
| 6   | 40.6, CH          | 2.44, m                               | 17  | 16.0, CH <sub>3</sub> | 0.98, d (5.8)                              |
| 7   | 74.5, CH          | 3.83, dd (10.1, 1.8)                  | 18  | 5.4, CH <sub>3</sub>  | 0.89, d (6.7)                              |
| 8   | 37.8, CH          | 1.99, m                               | 19  | 12.8, CH <sub>3</sub> | 0.94, d (6.8)                              |
| 9   | 78.2, CH          | 3.68, dd (11.5, 5.0)                  | 20  | 24.8, CH <sub>2</sub> | 1.50, m; 1.17, m                           |
| 10  | 42.2, CH          | 1.59, qd (11.5, 6.8)                  | 21  | 10.4, CH <sub>3</sub> | 0.91, t (7.3)                              |
| 11  | 103.4, C          | —                                     |     |                       |                                            |

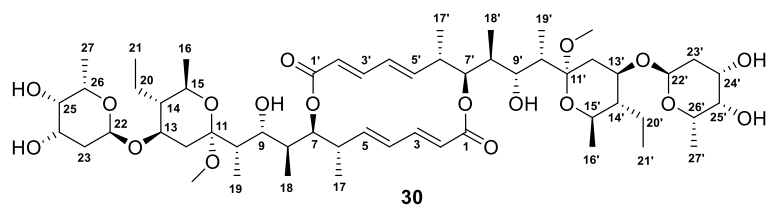

Table S14.  $^{13}\text{C}$  NMR (150 MHz) and  $^1\text{H}$  NMR (600 MHz) data of known compound **30** (in  $\text{DMSO}-d_6$ )

| No.     | $\delta_{\text{C}}$ , type | $\delta_{\text{H}}$ , multi. ( $J$ in Hz) | No.                     | $\delta_{\text{C}}$ , type | $\delta_{\text{H}}$ , multi. ( $J$ in Hz)     |
|---------|----------------------------|-------------------------------------------|-------------------------|----------------------------|-----------------------------------------------|
| 1, 1'   | 167.1, C                   | —                                         | 17, 17'                 | 15.6, $\text{CH}_3$        | 0.96, d (6.0)                                 |
| 2, 2'   | 121.3, CH                  | 5.69, d (15.5)                            | 18, 18'                 | 9.9, $\text{CH}_3$         | 0.83, t (7.3)                                 |
| 3, 3'   | 144.9, CH                  | 6.81, dd (15.5, 11.1)                     | 19, 19'                 | 7.2, $\text{CH}_3$         | 0.83, t (7.3)                                 |
| 4, 4'   | 130.4, CH                  | 6.09, dd (15.0, 11.1)                     | 20, 20'                 | 18.7, $\text{CH}_2$        | 1.59, m; 1.35, m                              |
| 5, 5'   | 145.0, CH                  | 5.65, dd (15.0, 11.1)                     | 21, 21'                 | 8.8, $\text{CH}_3$         | 0.77, t (7.4)                                 |
| 6, 6'   | 41.2, CH                   | 2.46, m                                   | 22, 22'                 | 92.5, CH                   | 4.90, d (4.0)                                 |
| 7, 7'   | 76.1, CH                   | 5.12, d (10.0)                            | 23, 23'                 | 32.6, $\text{CH}_2$        | 1.78, td (12.0, 4.0);<br>1.38, dd (12.0, 5.0) |
| 8, 8'   | 36.7, CH                   | 1.70, m                                   | 24, 24'                 | 64.9, CH                   | 3.72, m                                       |
| 9, 9'   | 68.1, CH                   | 3.32, dd (10.0, 7.0)                      | 25, 25'                 | 70.3, CH                   | 3.37, m                                       |
| 10, 10' | 37.5, CH                   | 1.87, q (7.0)                             | 26, 26'                 | 66.3, CH                   | 3.74, m                                       |
| 11, 11' | 102.7, C                   | —                                         | 27, 27'                 | 17.1, $\text{CH}_3$        | 1.05, d (7.5)                                 |
| 12, 12' | 33.7, $\text{CH}_2$        | 2.37, dd (13.5, 4.5); 1.08, m             | $\text{OCH}_3$ -11, 11' | 45.6, $\text{CH}_3$        | 2.94, m                                       |
| 13, 13' | 68.2, CH                   | 3.68, dd (11.0, 5.2)                      | $\text{OH}$ -9, 9'      | —                          | 4.37, d (7.0)                                 |
| 14, 14' | 47.1, CH                   | 1.04, m                                   | $\text{OH}$ -24, 24'    | —                          | 4.52, br s                                    |
| 15, 15' | 66.9, CH                   | 3.40, m                                   | $\text{OH}$ -25, 25'    | —                          | 4.27, d (4.0)                                 |
| 16, 16' | 18.9, $\text{CH}_3$        | 1.11, d (6.0)                             |                         |                            |                                               |

Table S15.  $^1\text{H}$  NMR data of compound **8s** and **8r** (600 MHz, in  $\text{MeOH}-d_4$ , multi.,  $J$  in Hz)

| No. | <b>8s</b>                                      | <b>8r</b>                                      | $\Delta\delta_{\text{S-R}}$ |
|-----|------------------------------------------------|------------------------------------------------|-----------------------------|
| 3   | 6.85, d (1.8)                                  | 6.82, d (1.8)                                  | +0.03                       |
| 4a  | 2.02, d (1.8)                                  | 2.02, d (1.8)                                  | 0.00                        |
| 6   | 4.94, m                                        | 4.96, m                                        | -0.02                       |
| 6a  | 1.05, d (6.3)                                  | 1.15, t (6.4)                                  | -0.10                       |
| 7   | 5.16, t (7.8)                                  | 5.17, dd (8.6, 6.2)                            | -0.01                       |
| 8   | 4.53, dd (15.8, 7.8)                           | 4.45, dd (15.7, 8.6)                           | +0.08                       |
| 9   | 5.49, dd (15.8, 4.7)                           | 5.46, dd (15.7, 4.4)                           | +0.03                       |
| 10  | 1.50, m                                        | 1.46, m                                        | +0.04                       |
| 10a | 1.43, m; 1.08, m                               | 1.29, m; 0.89, m                               | +0.14; +0.19                |
| 10b | 0.73, t (7.5)                                  | 0.71, t (7.5)                                  | +0.02                       |
| 11  | 1.29, m; 1.13, m                               | 1.07, m; 0.99, m                               | +0.22; +0.14                |
| 12  | 2.84, dd (18.3, 6.3);<br>2.12, dd (18.3, 12.3) | 2.80, dd (18.7, 5.8);<br>2.11, dd (18.7, 12.7) | +0.04;<br>+0.01             |
| 16a | 1.97, s                                        | 2.02, s                                        | -0.05                       |
| 17  | 7.78, s                                        | 7.79, s                                        | -0.01                       |
| 21  | 5.96, s                                        | 5.94, s                                        | +0.02                       |

Figure S3.  $^1\text{H}$  NMR spectrum of hygrocin K (5)

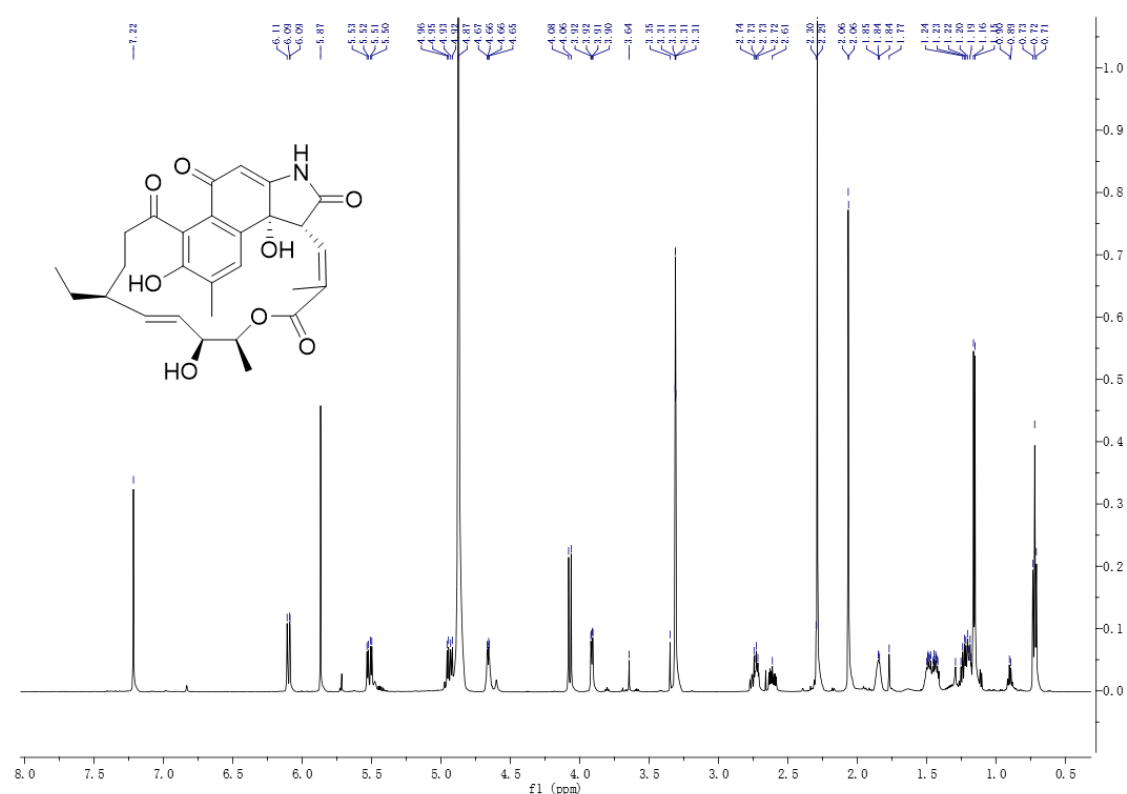

Figure S4.  $^1\text{H}$  NMR spectrum of hygrocin K (5)

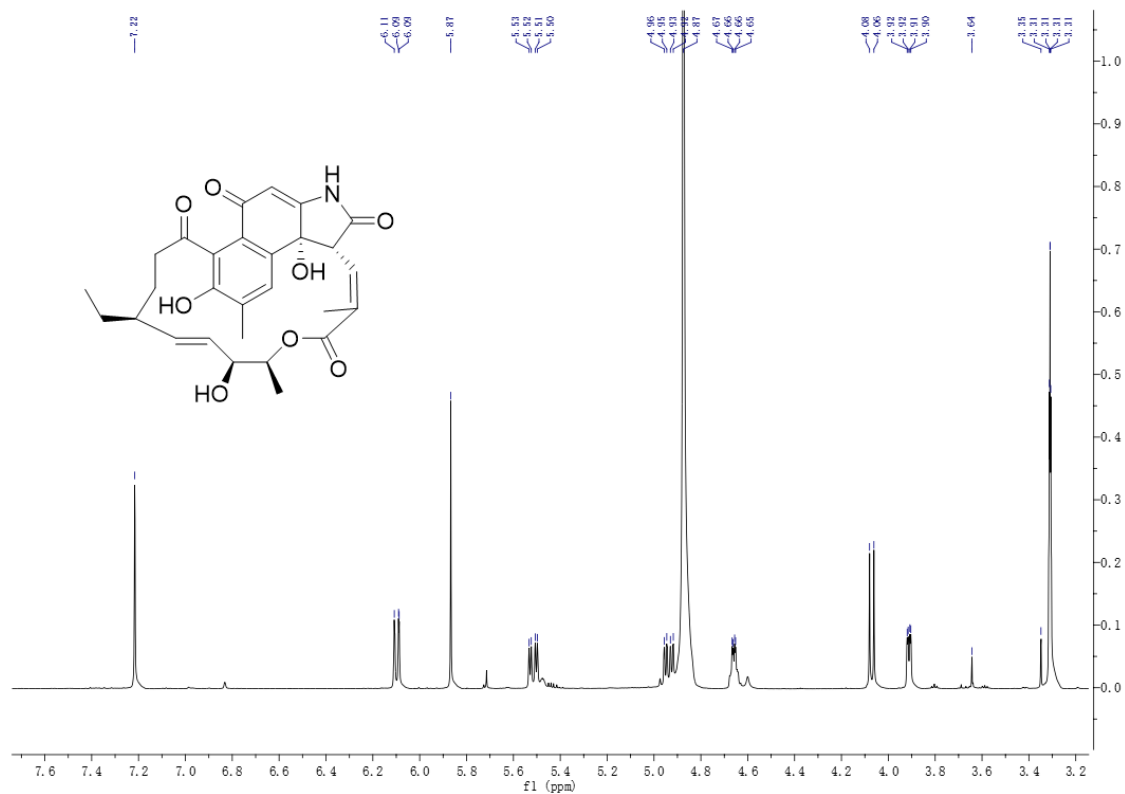

Figure S5.  $^1\text{H}$  NMR spectrum of hygrocin K (5)

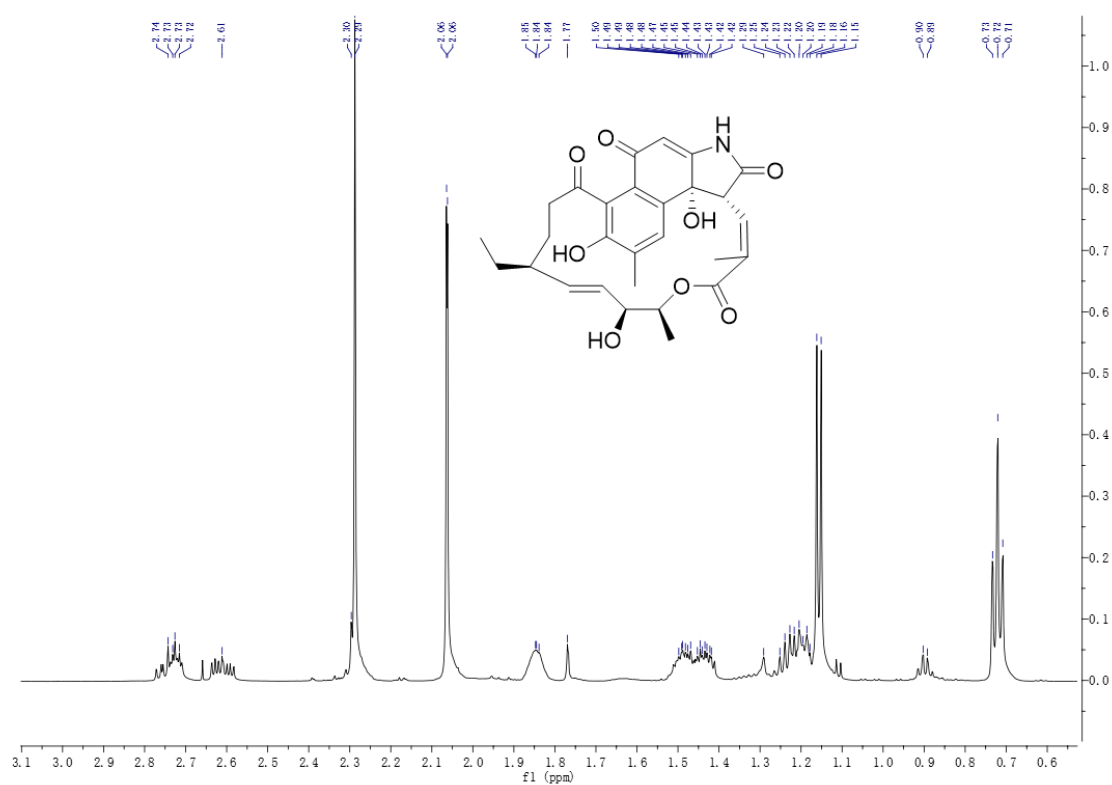

Figure S6.  $^{13}\text{C}$  NMR spectrum of hygrocin K (5)

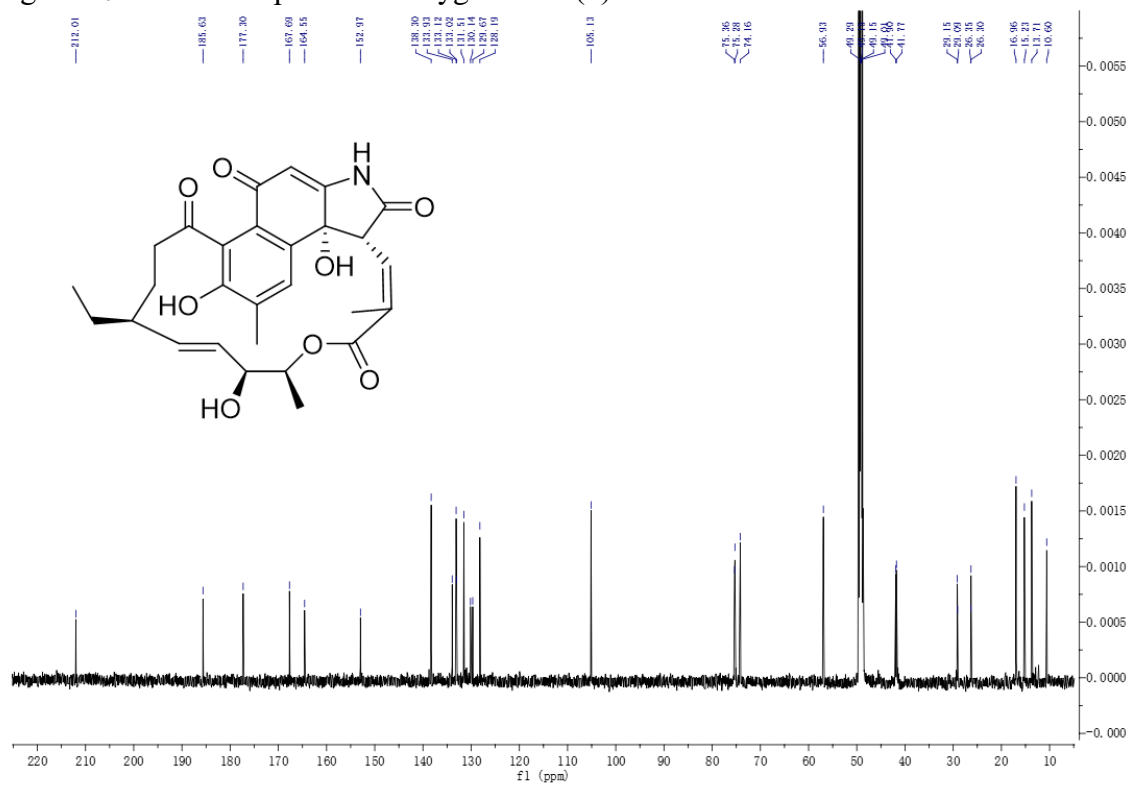

Figure S7.  $^{13}\text{C}$  NMR spectrum of hygrocin K (**5**)

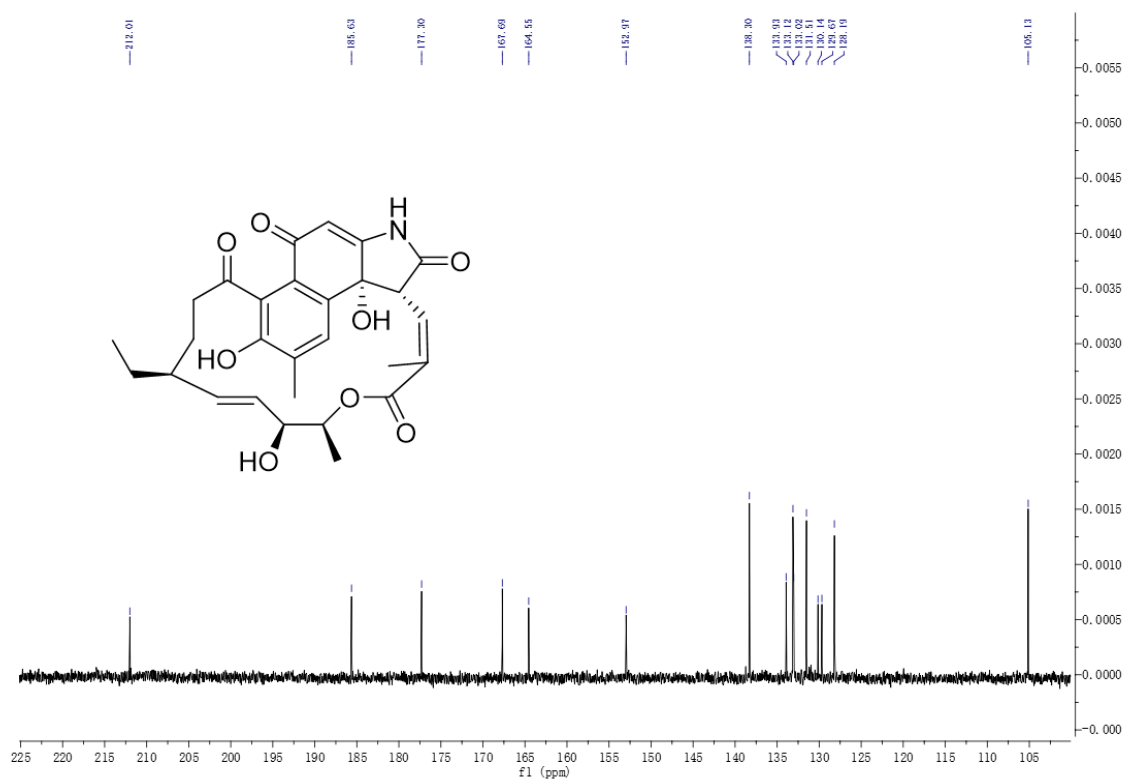

Figure S8.  $^{13}\text{C}$  NMR spectrum of hygrocin K (**5**)

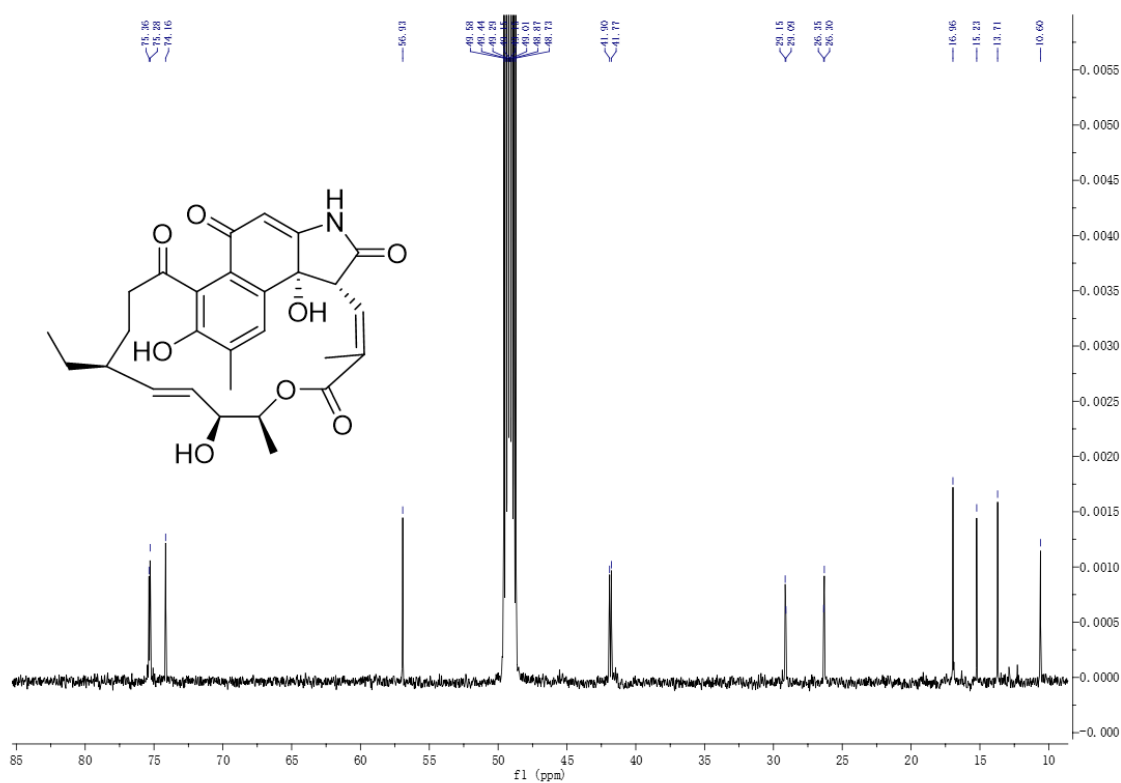



Figure S9. HMQC spectrum of hygrocin K (**5**)

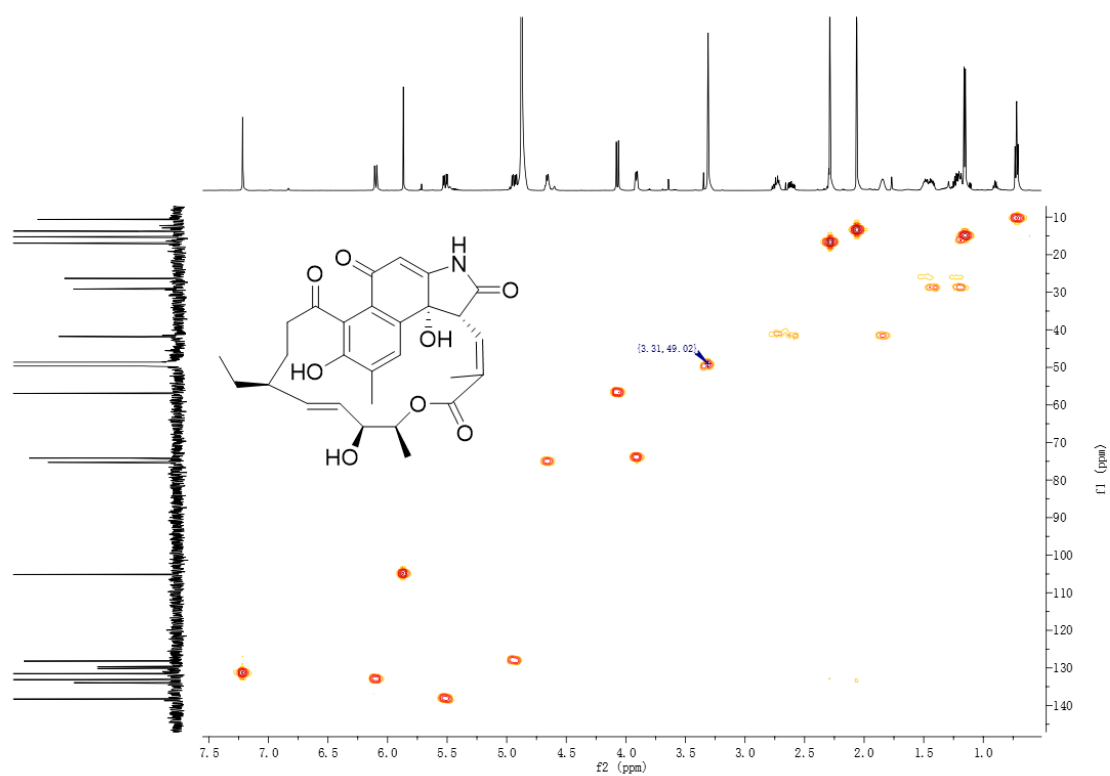

Figure S10. HMQC spectrum of hygrocin K (**5**)

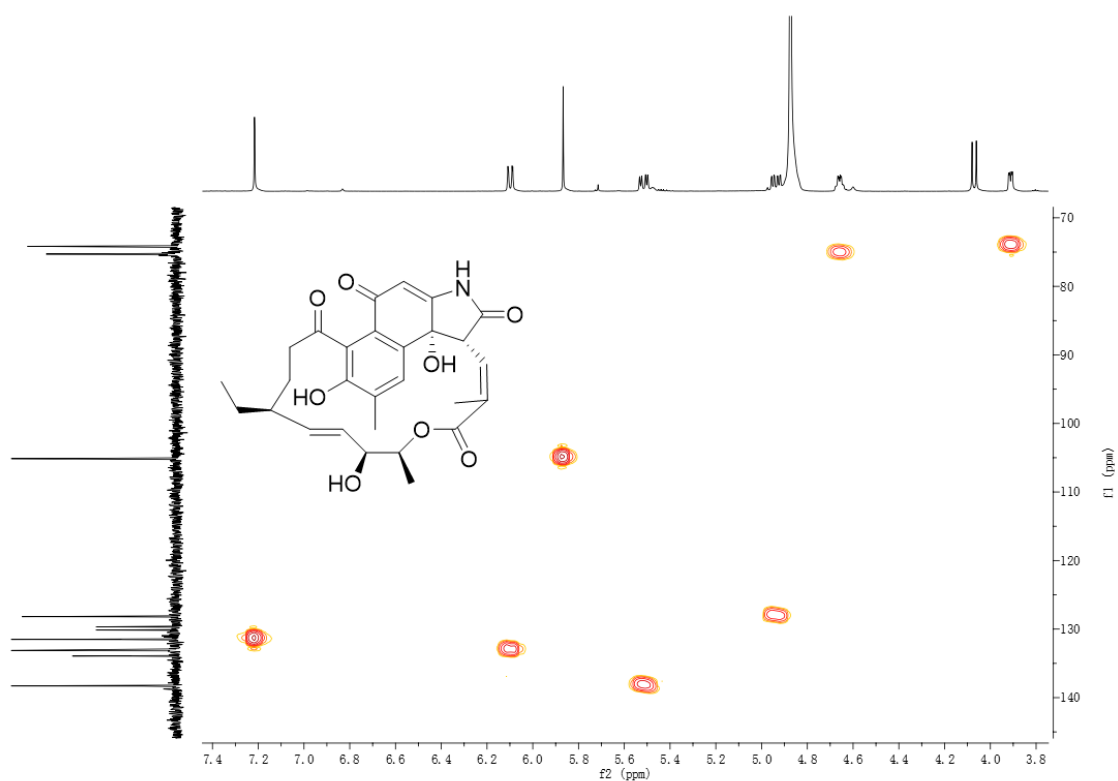

Figure S11. HMQC spectrum of hygrocin K (**5**)

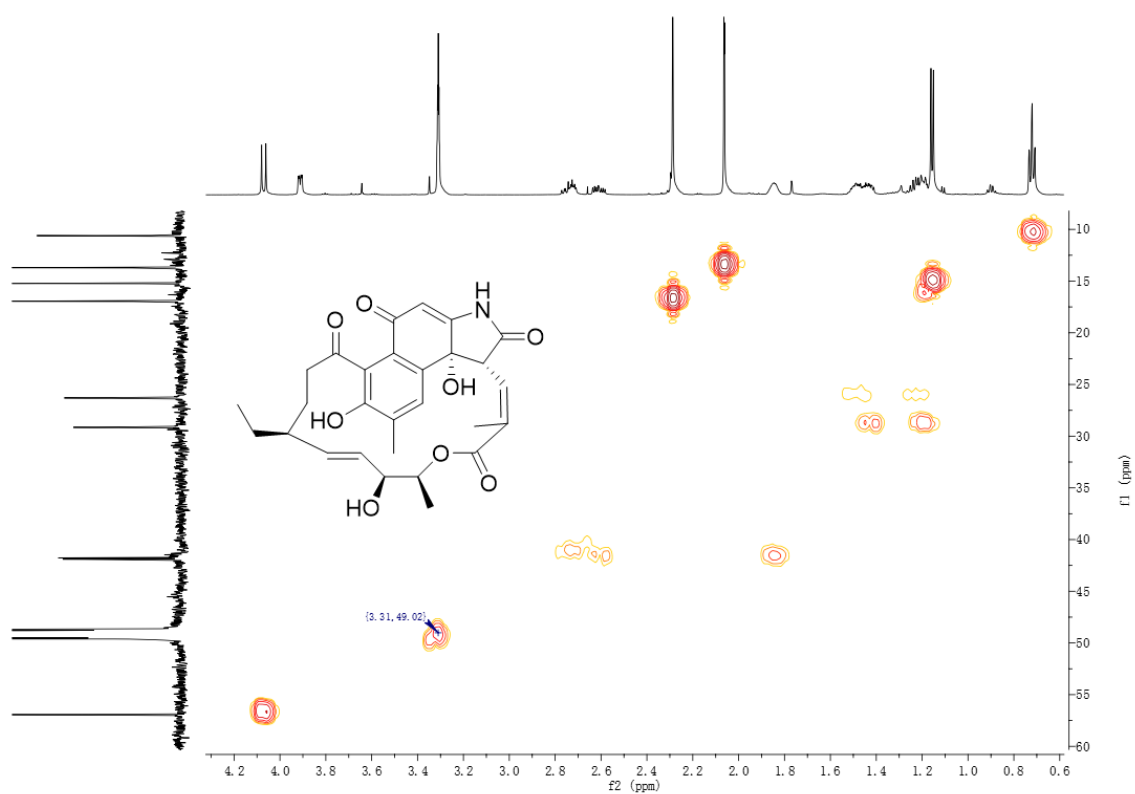

Figure S12. COSY spectrum of hygrocin K (**5**)

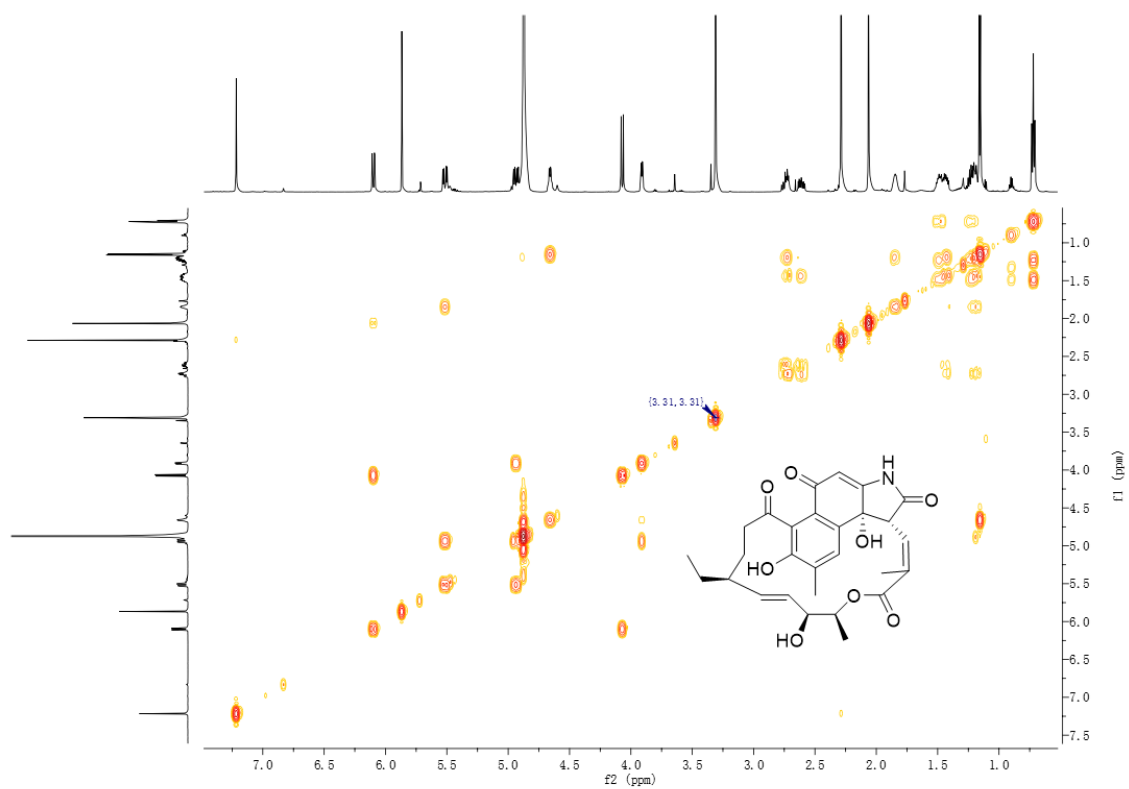

Figure S13. HMBC spectrum of hygrocin K (**5**)

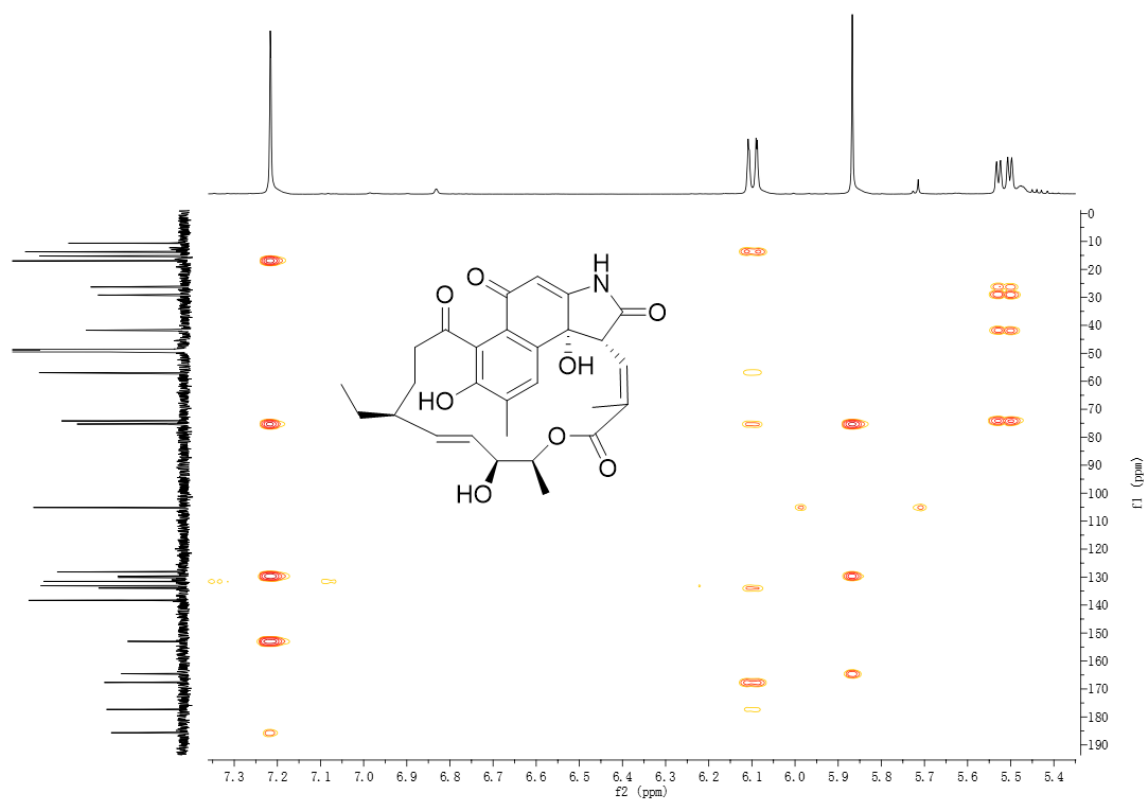

Figure S14. HMBC spectrum of hygrocin K (**5**)

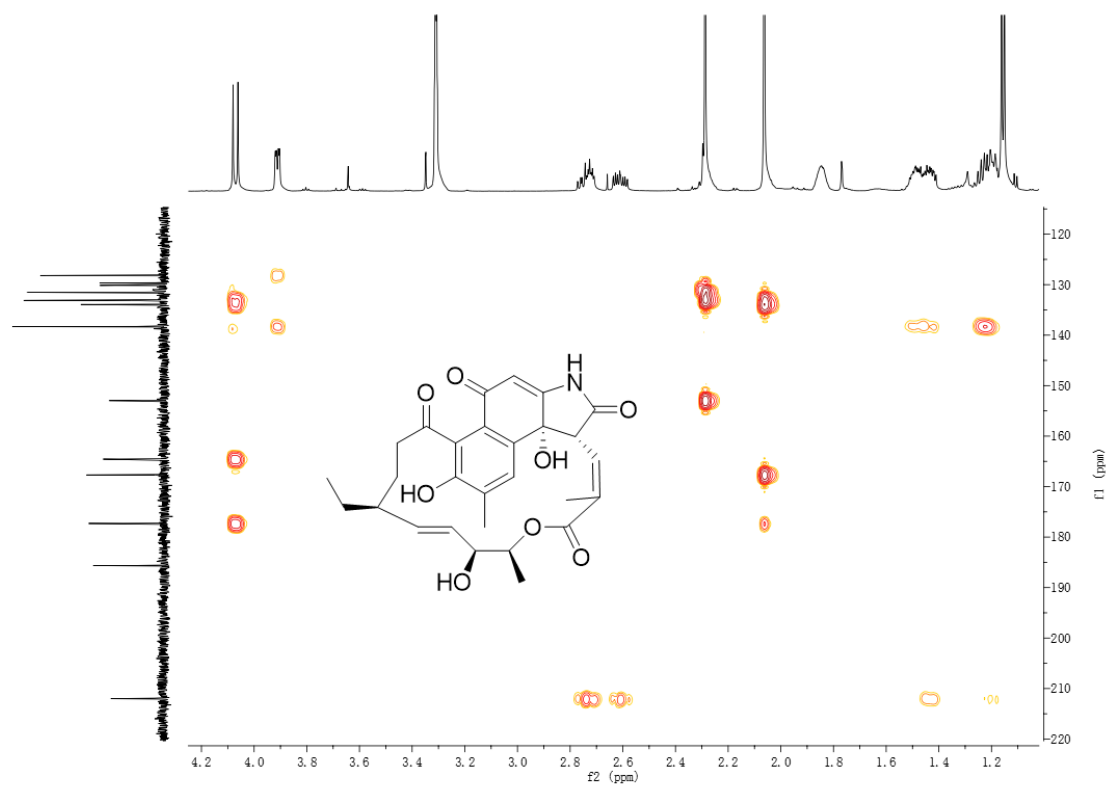

Figure S15. HMBC spectrum of hygrocine K (**5**)

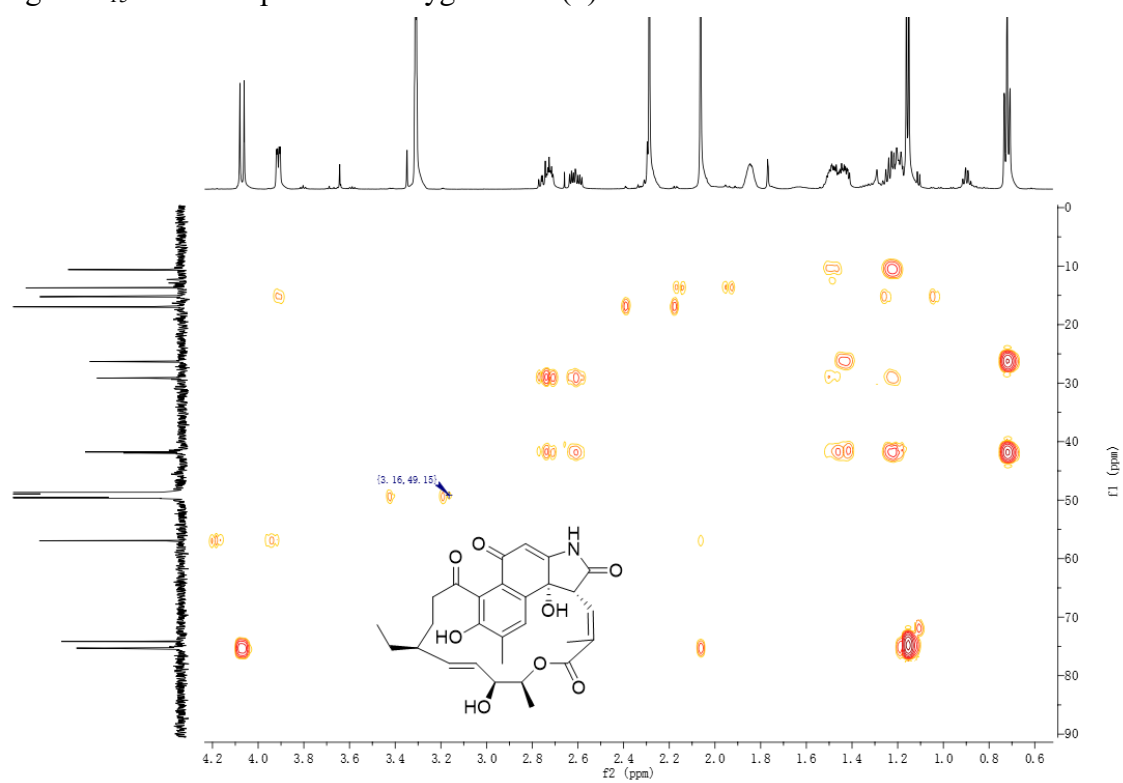

Figure S16. NOESY spectrum of hygrocine K (**5**)

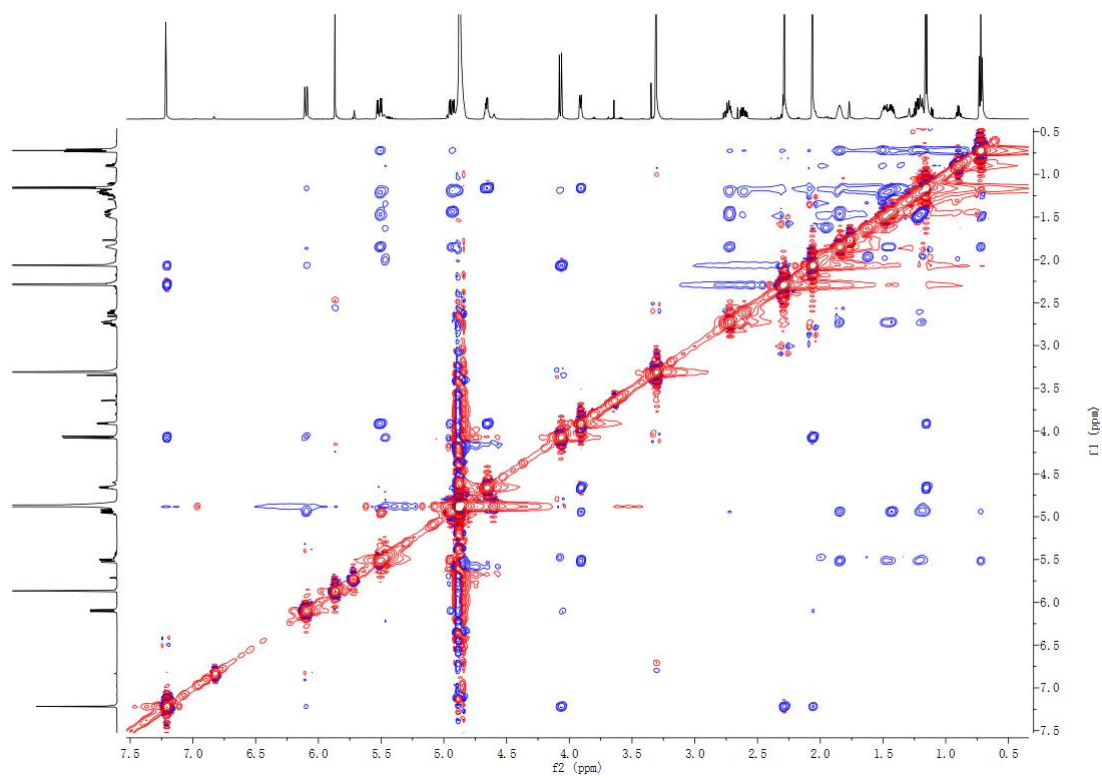

Figure S17. HRESIMS spectrum of hygrocin K (5)

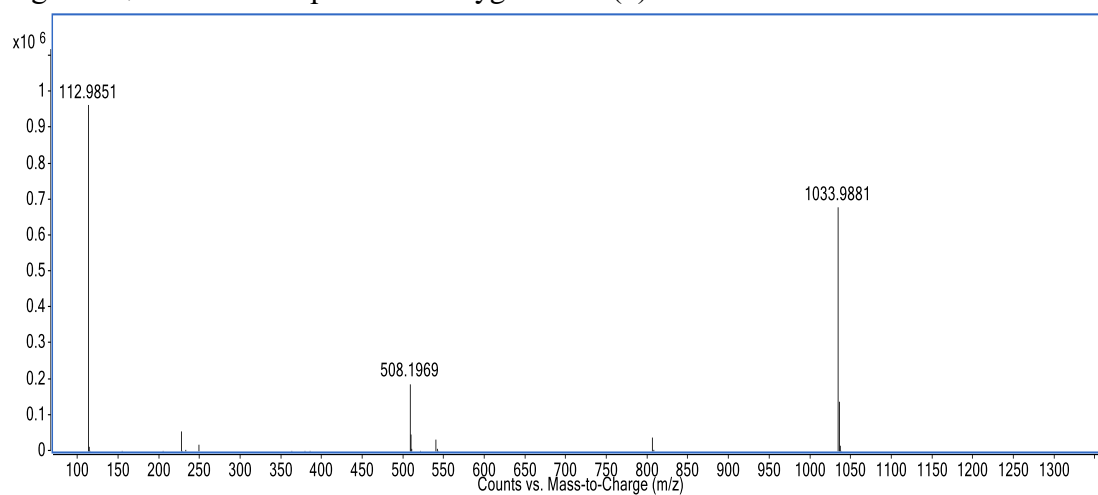

Figure S18. UV spectrum of hygrocin K (5)

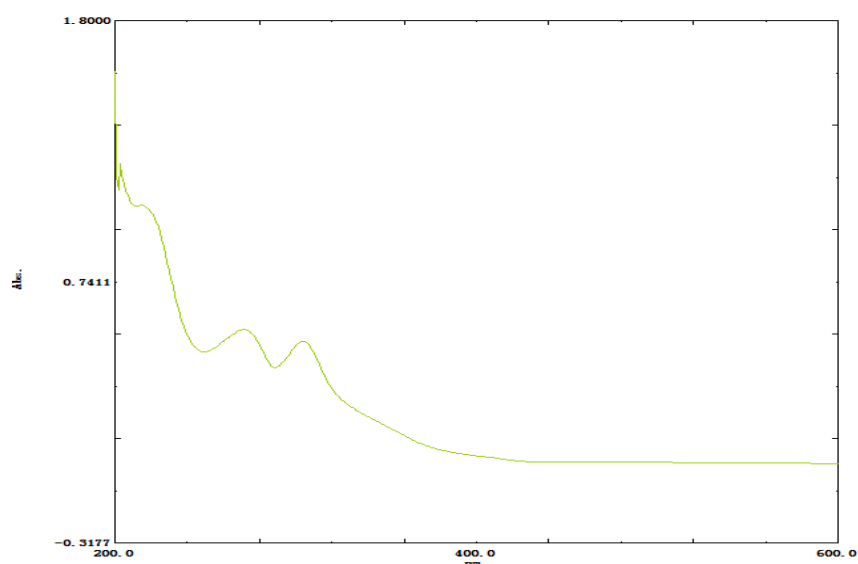

Figure S19. IR spectrum of hygrocin K (5)

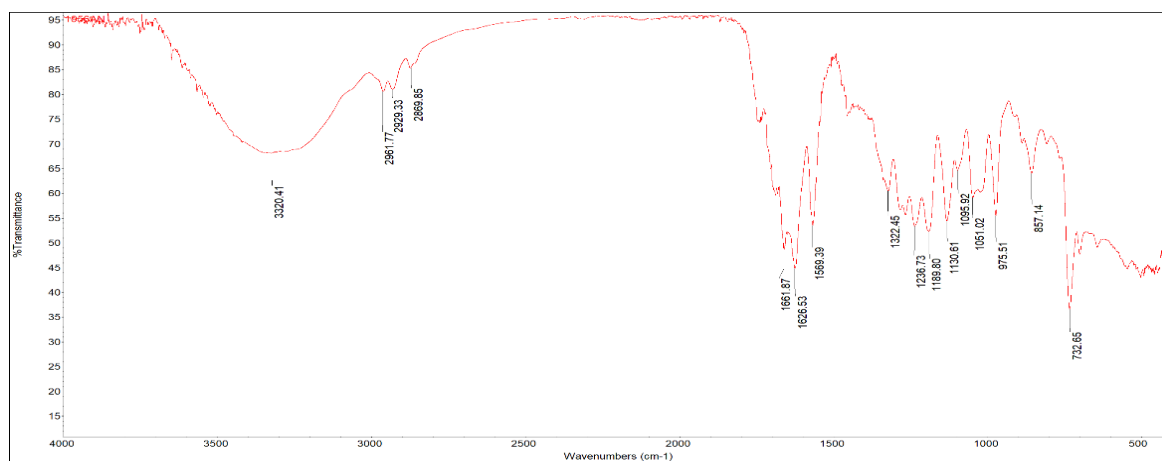

Figure S20.  $^1\text{H}$  NMR spectrum of hygrocin L (**6**)

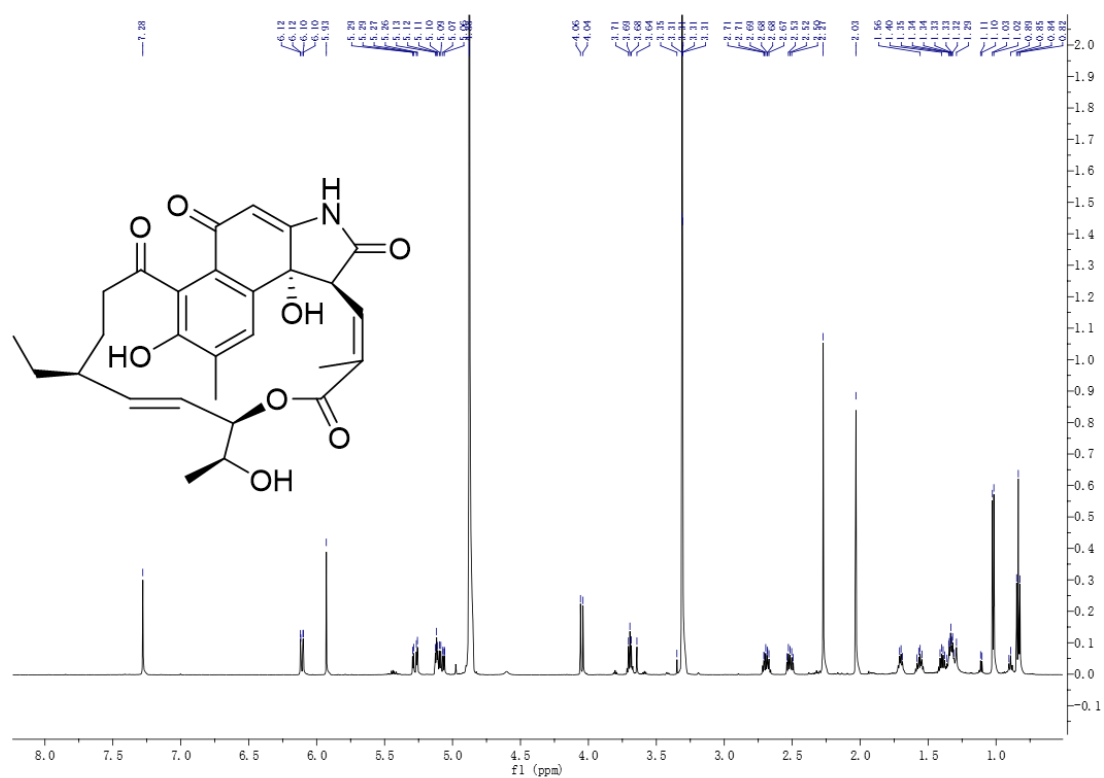

Figure S21.  $^1\text{H}$  NMR spectrum of hygrocin L (**6**)

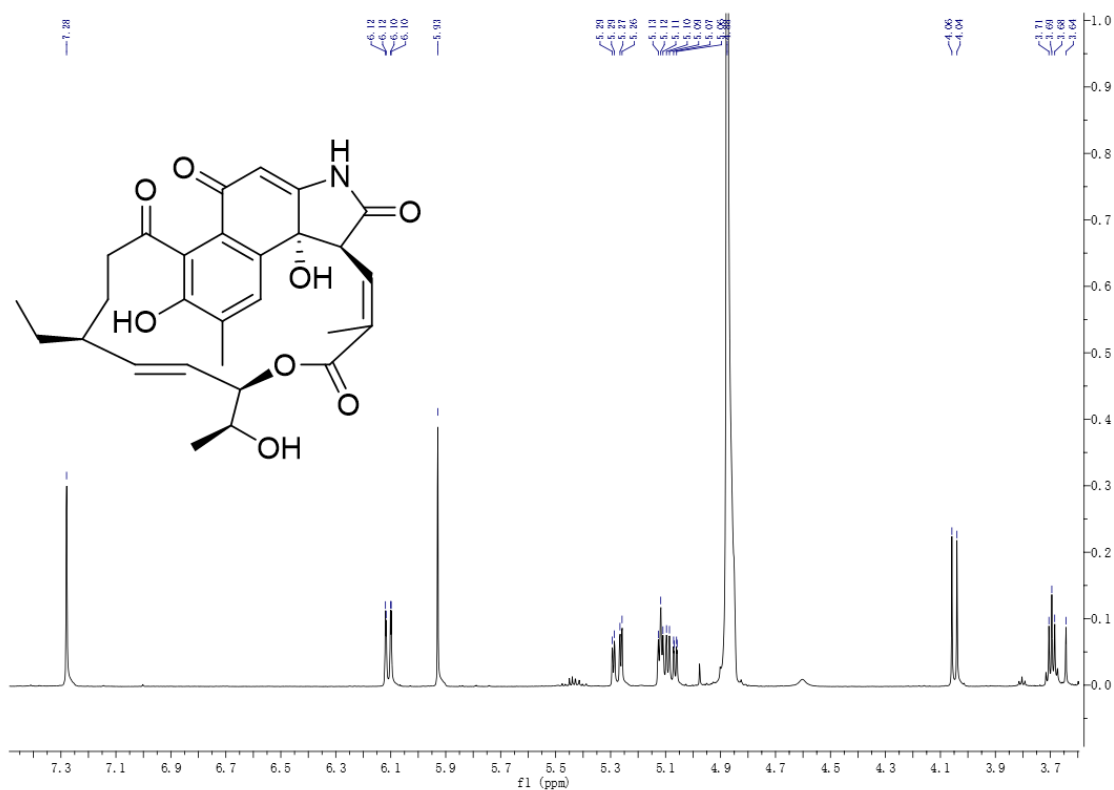

Figure S22. <sup>1</sup>H NMR spectrum of hygrocinn L (6)

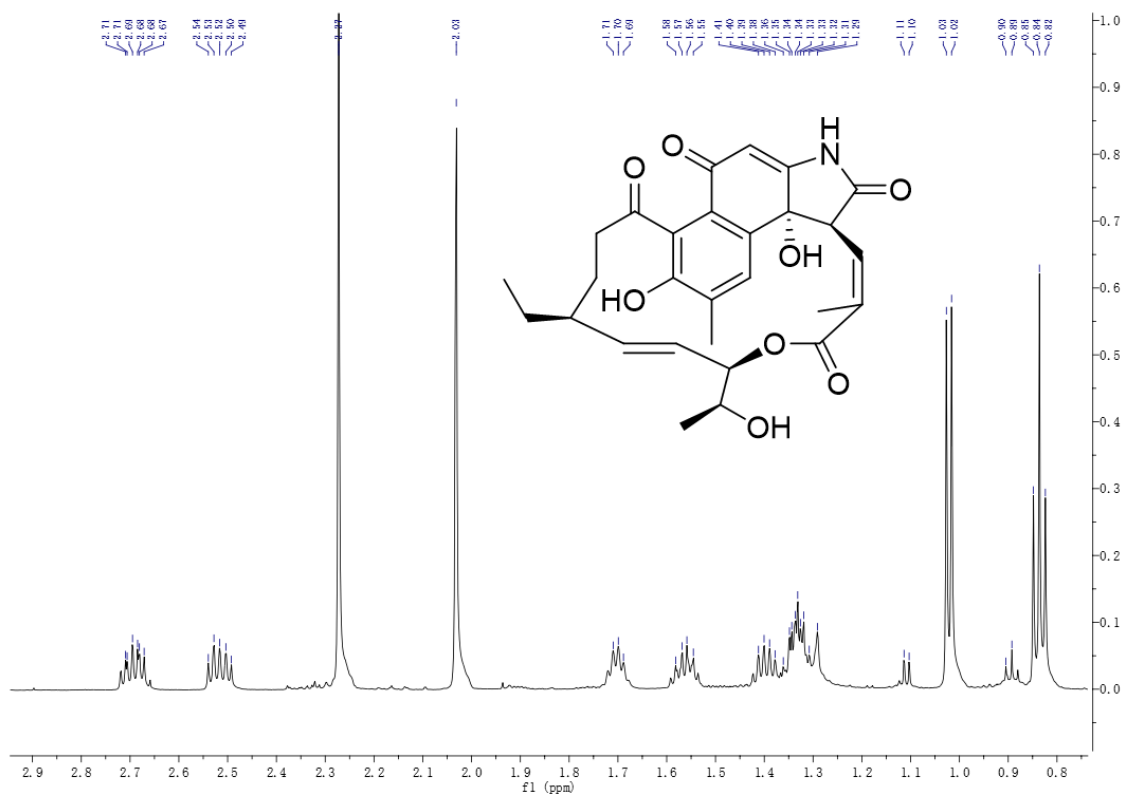

Figure S23.  $^{13}\text{C}$  NMR spectrum of hygrocinn L (6)

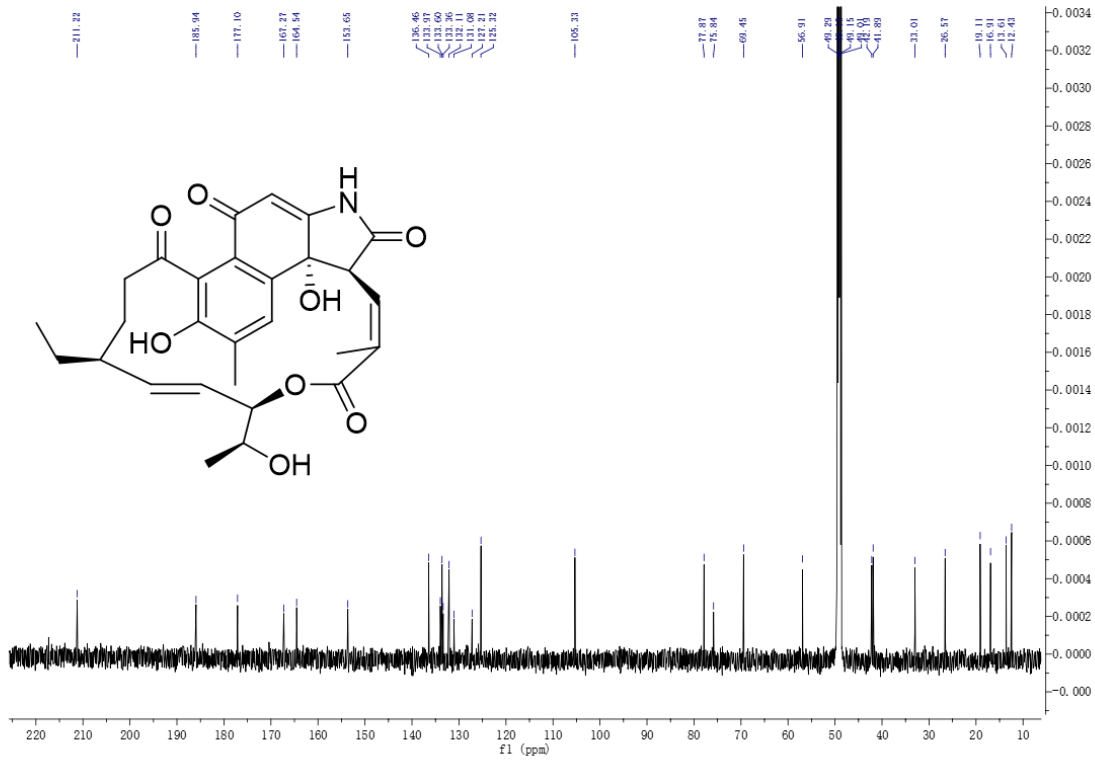

Figure S24.  $^{13}\text{C}$  NMR spectrum of hygrocin L (6)

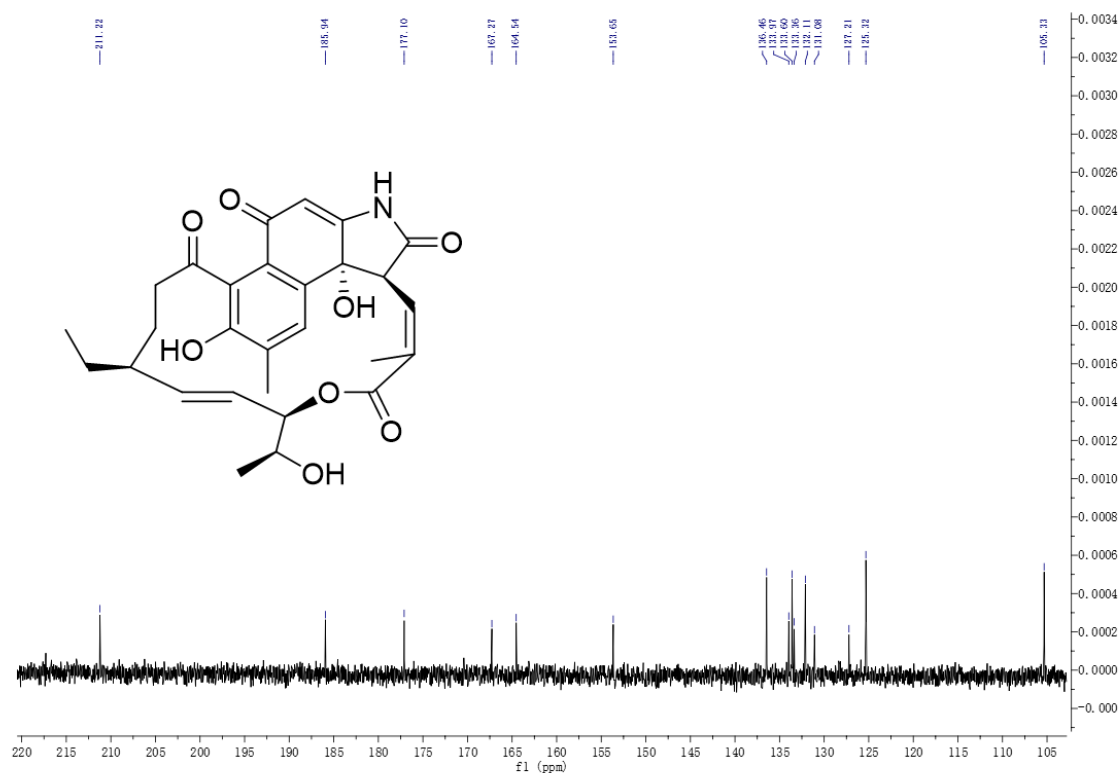

Figure S25.  $^{13}\text{C}$  NMR spectrum of hygrocin L (6)

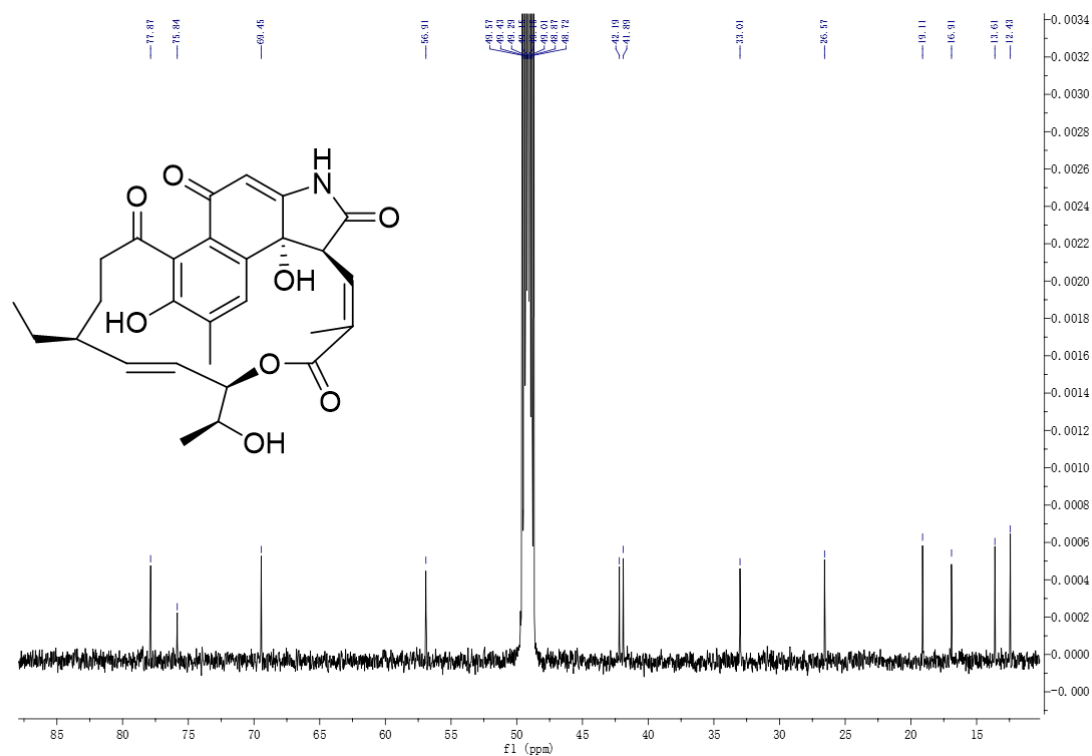



Figure S26. HMQC spectrum of hygrocin L (**6**)

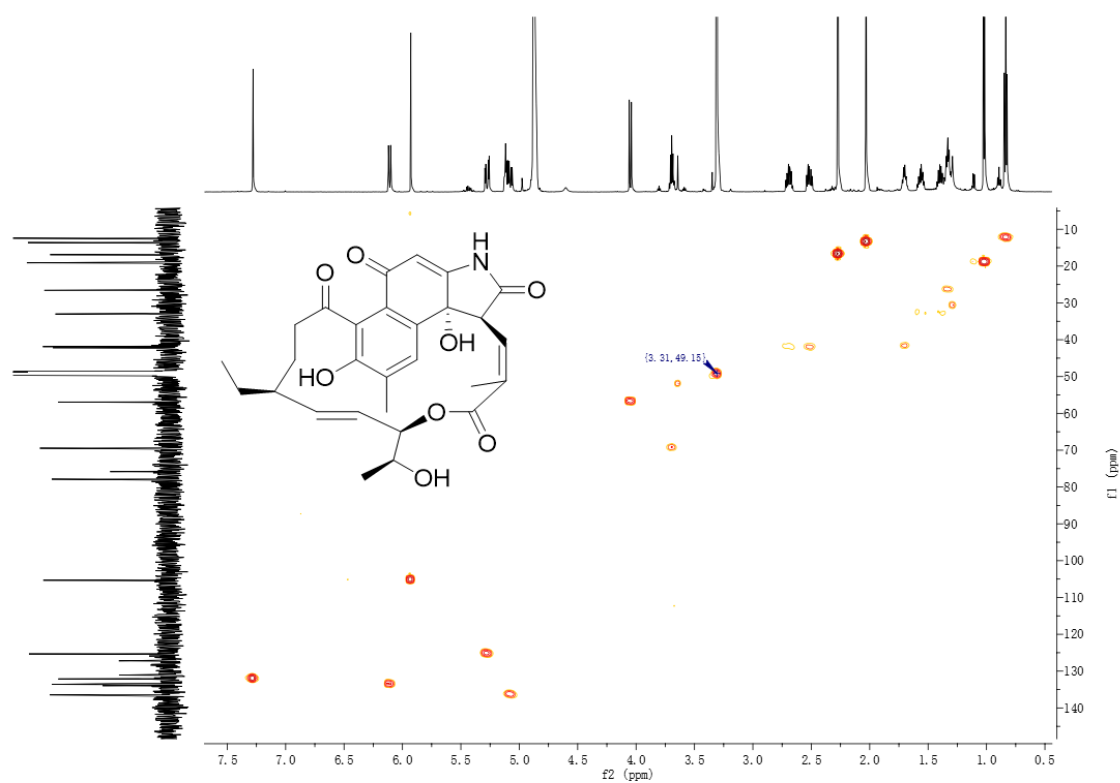

Figure S27. HMQC spectrum of hygrocin L (**6**)

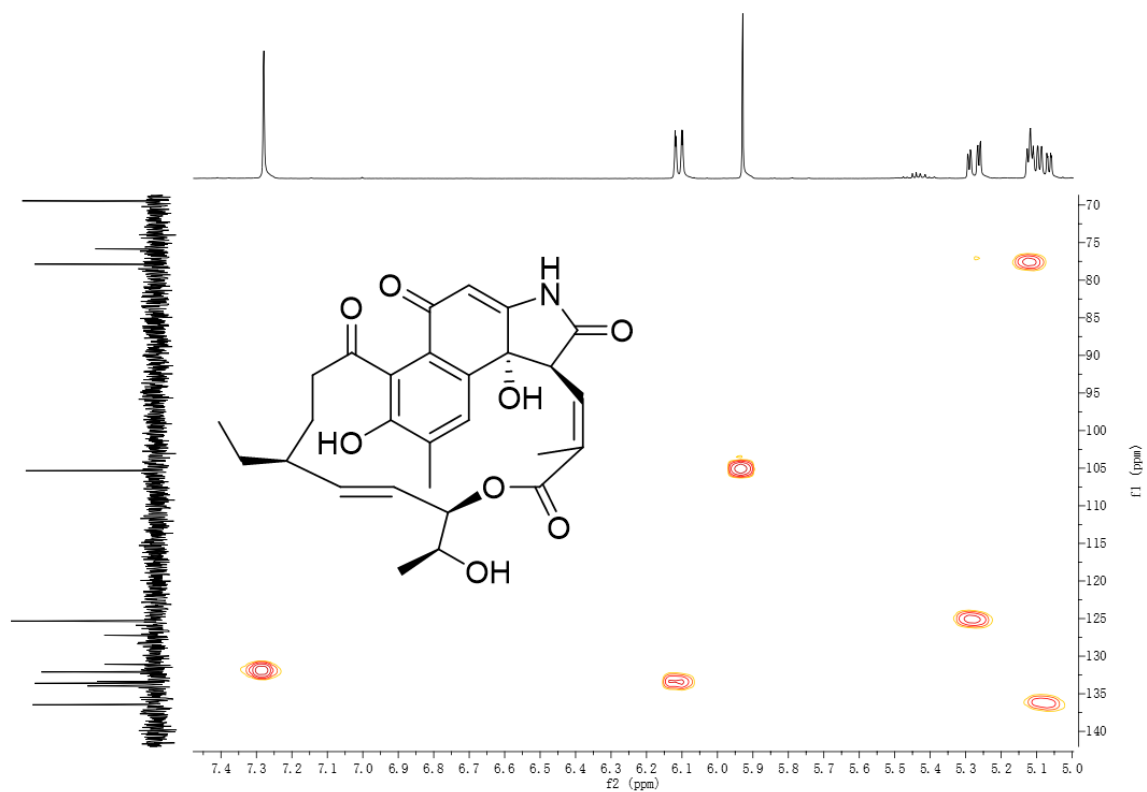

Figure S28. HMQC spectrum of hygrocin L (6)

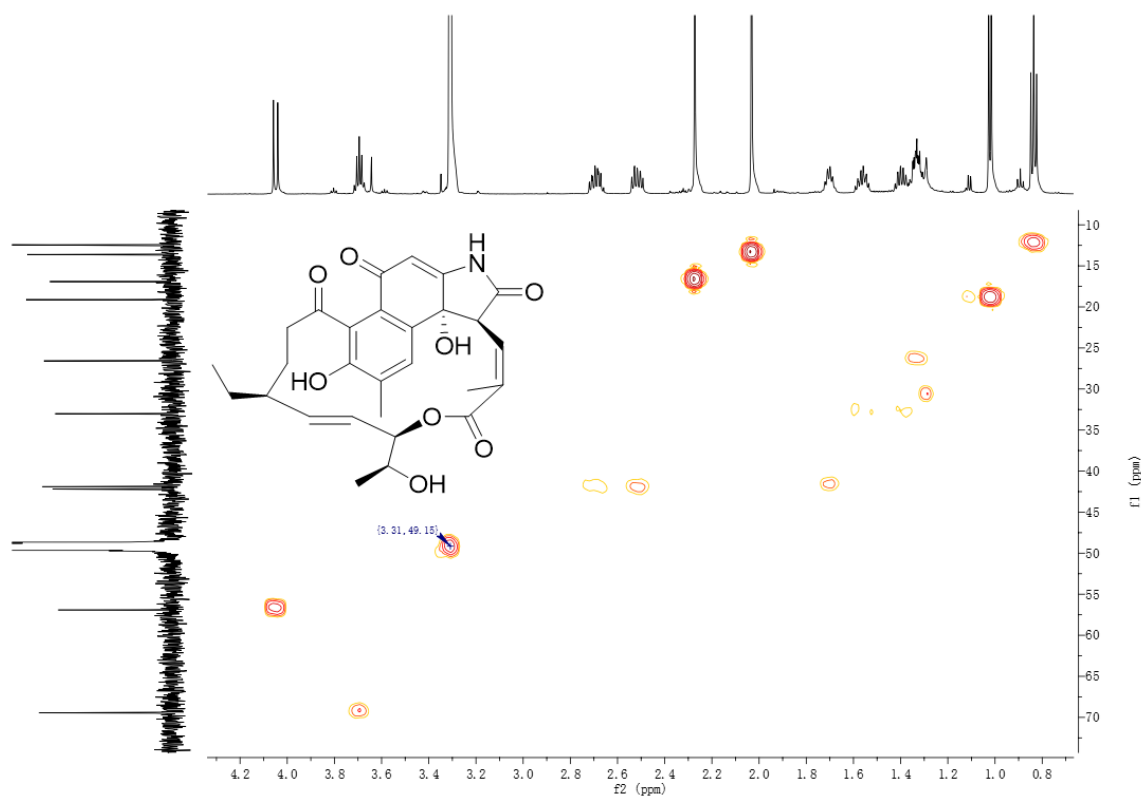

Figure S29. COSY spectrum of hygrocin L (6)

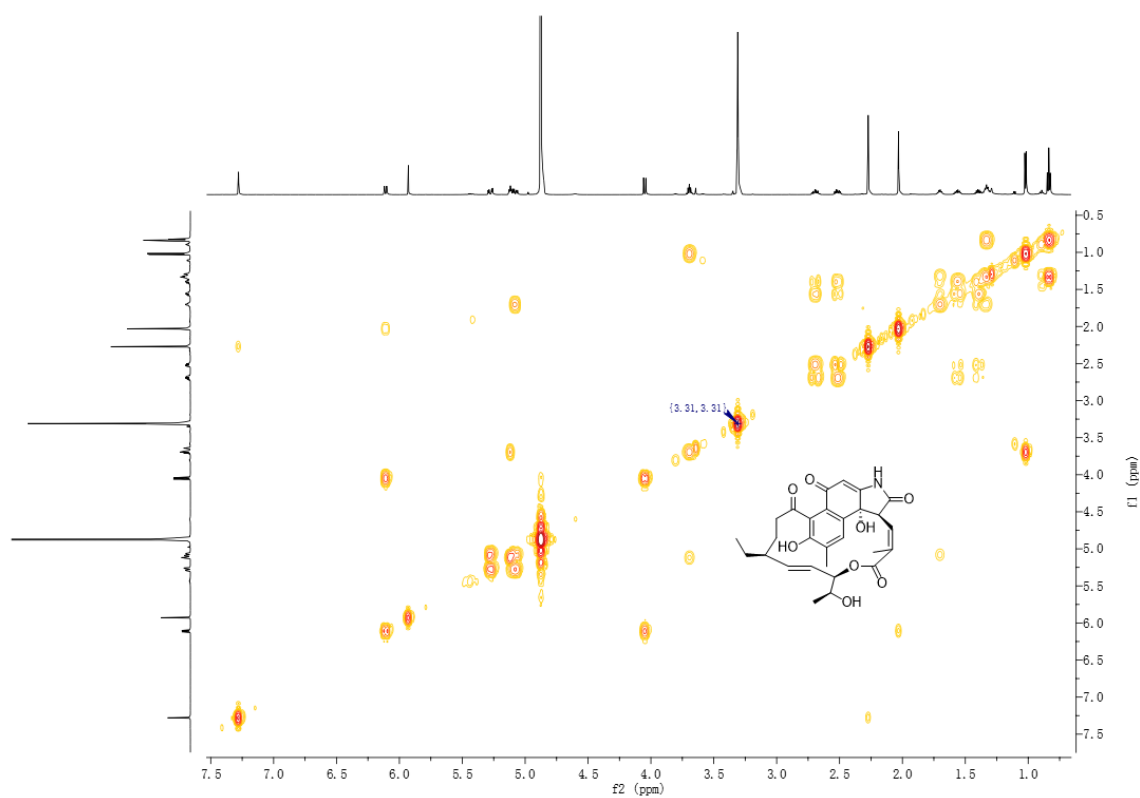

Figure S30. HMBC spectrum of hygrocin L (**6**)

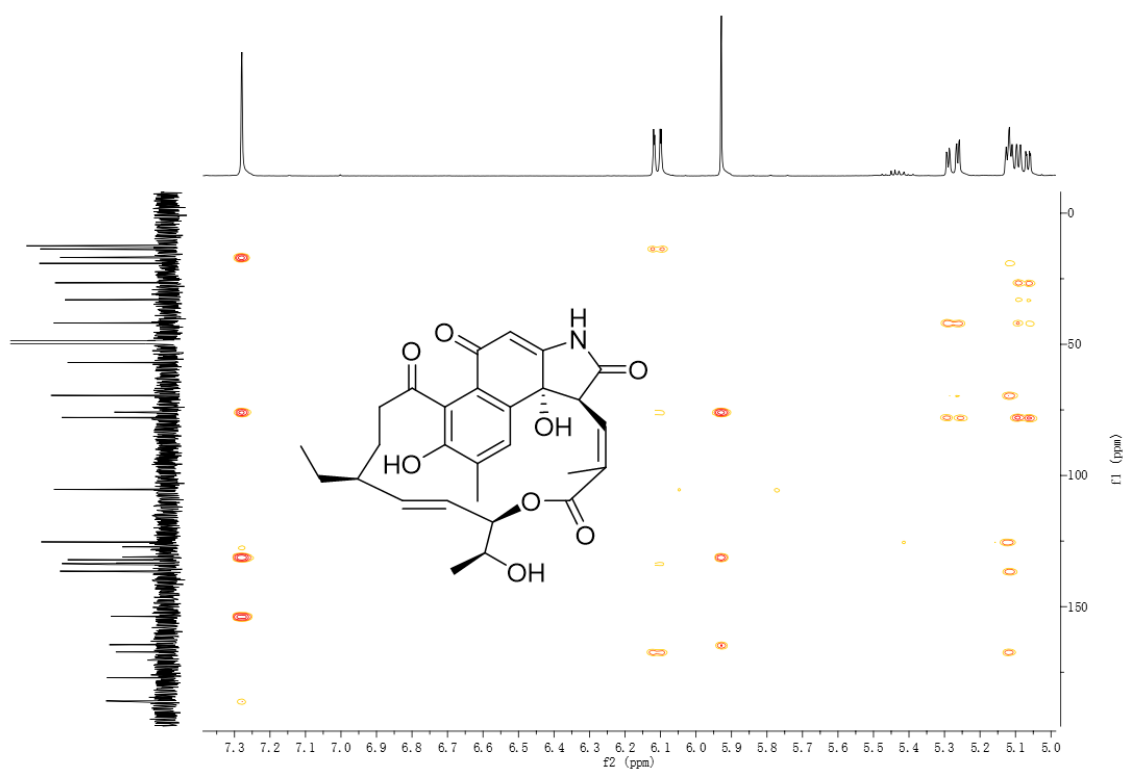

Figure S31. HMBC spectrum of hygrocin L (**6**)

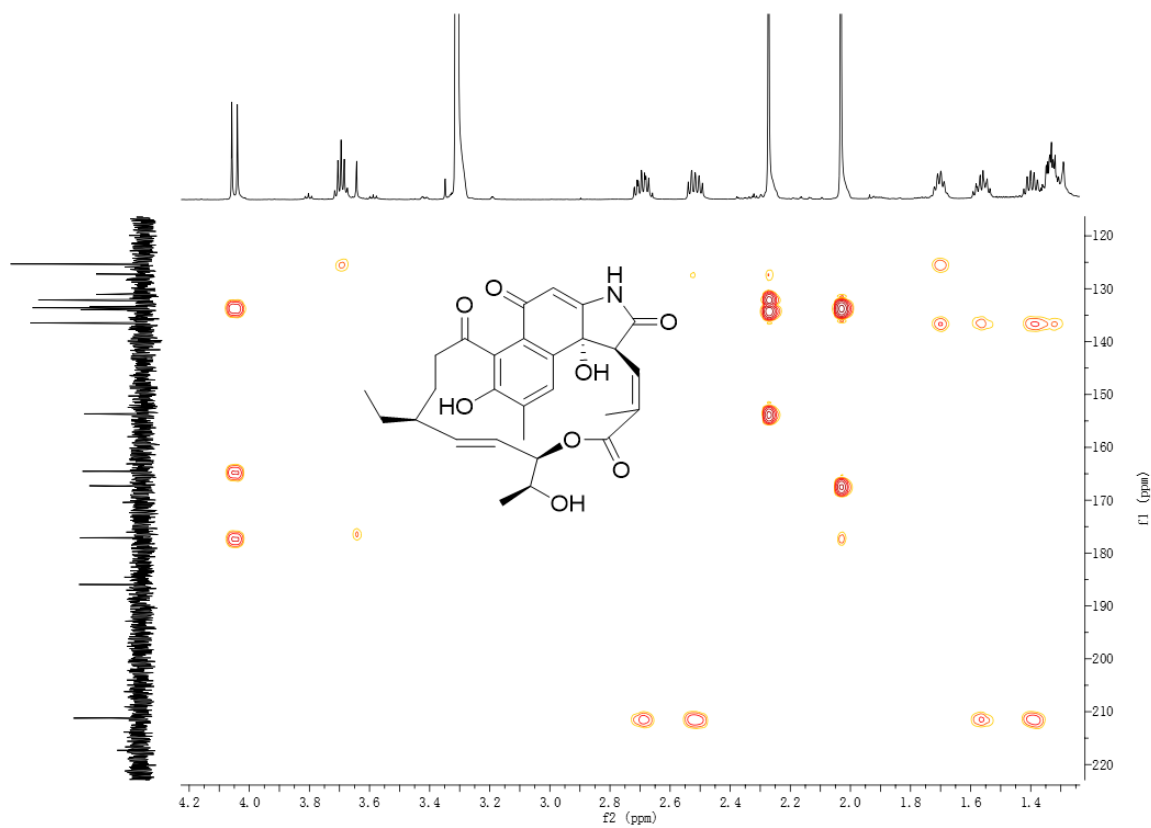

Figure S32. HMBC spectrum of hygrocin L (6)

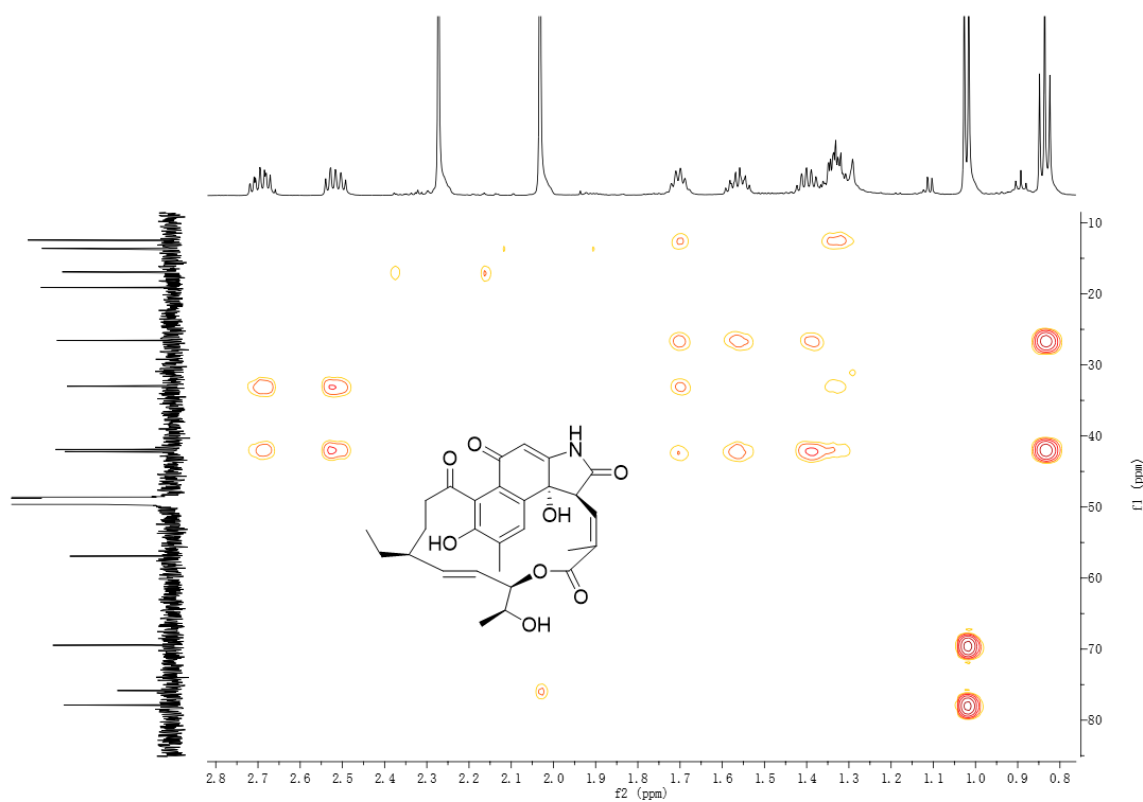

Figure S33. NOESY spectrum of hygrocin L (6)

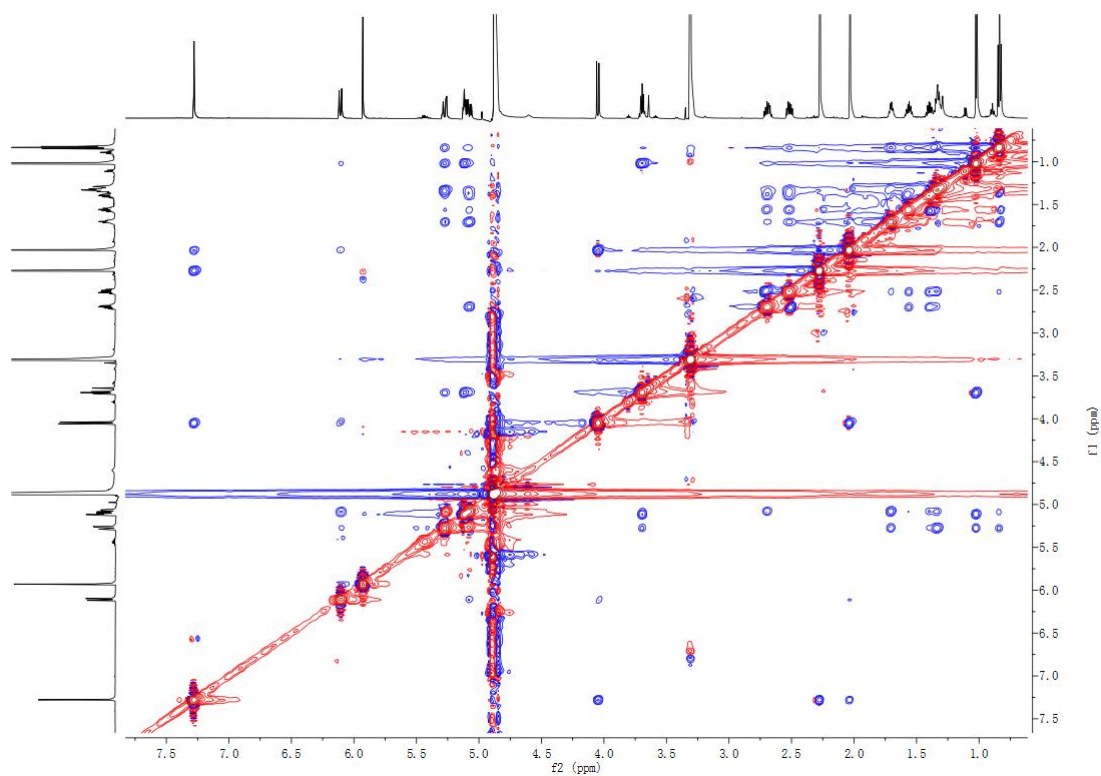

Figure S<sub>34</sub>. HRESIMS spectrum of hygrocin L (6)

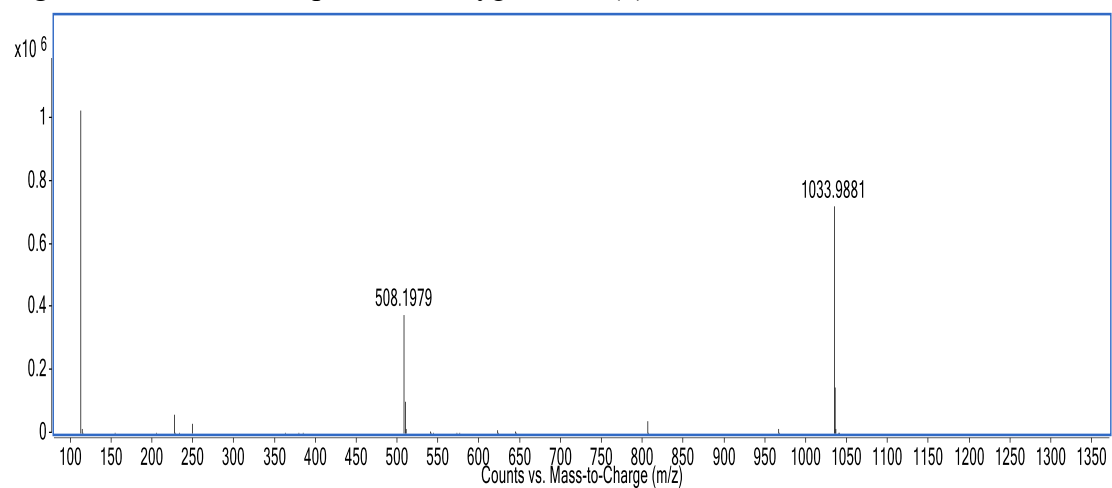

Figure S<sub>35</sub>. UV spectrum of hygrocin L (6)

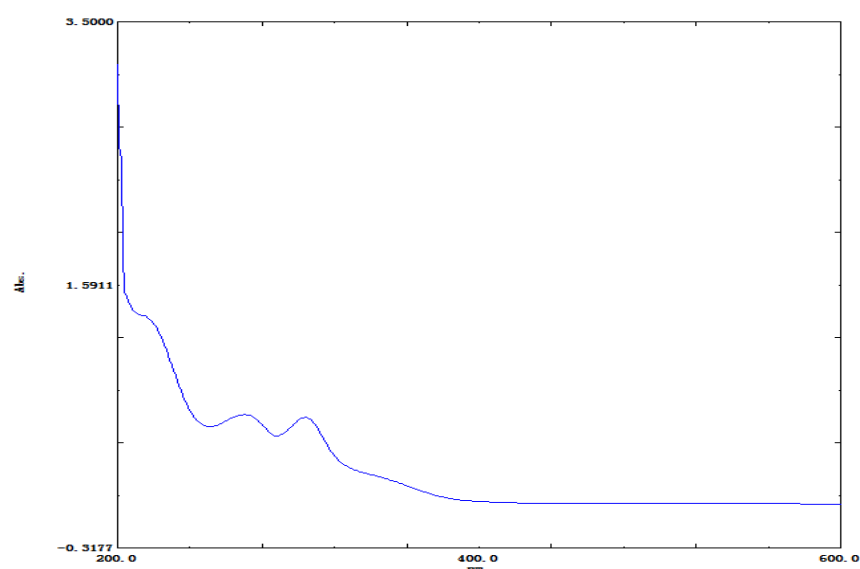

Figure S<sub>36</sub>. IR spectrum of hygrocin L (6)

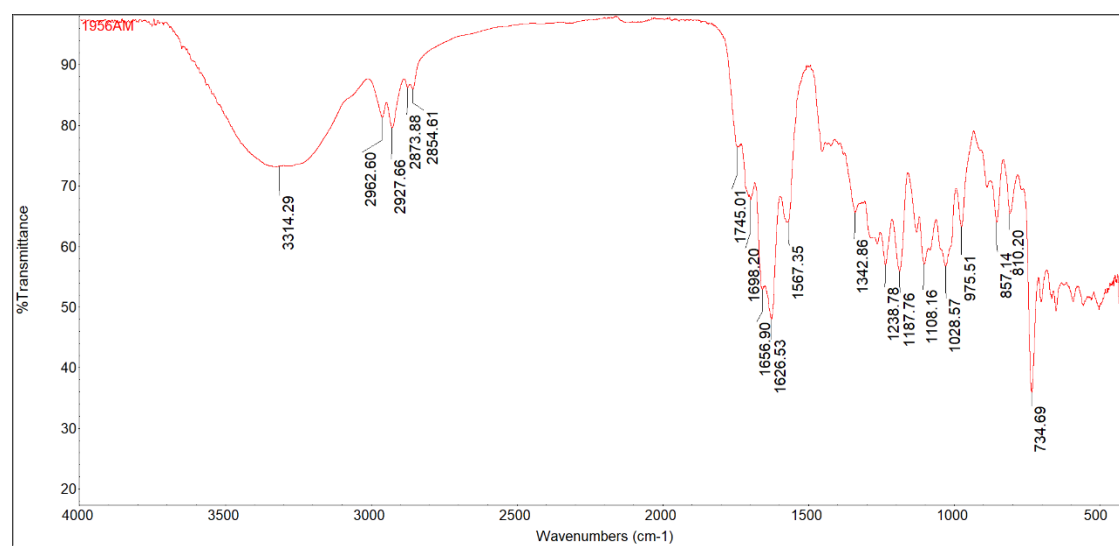

Figure S37.  $^1\text{H}$  NMR spectrum of hygrocin M (7)

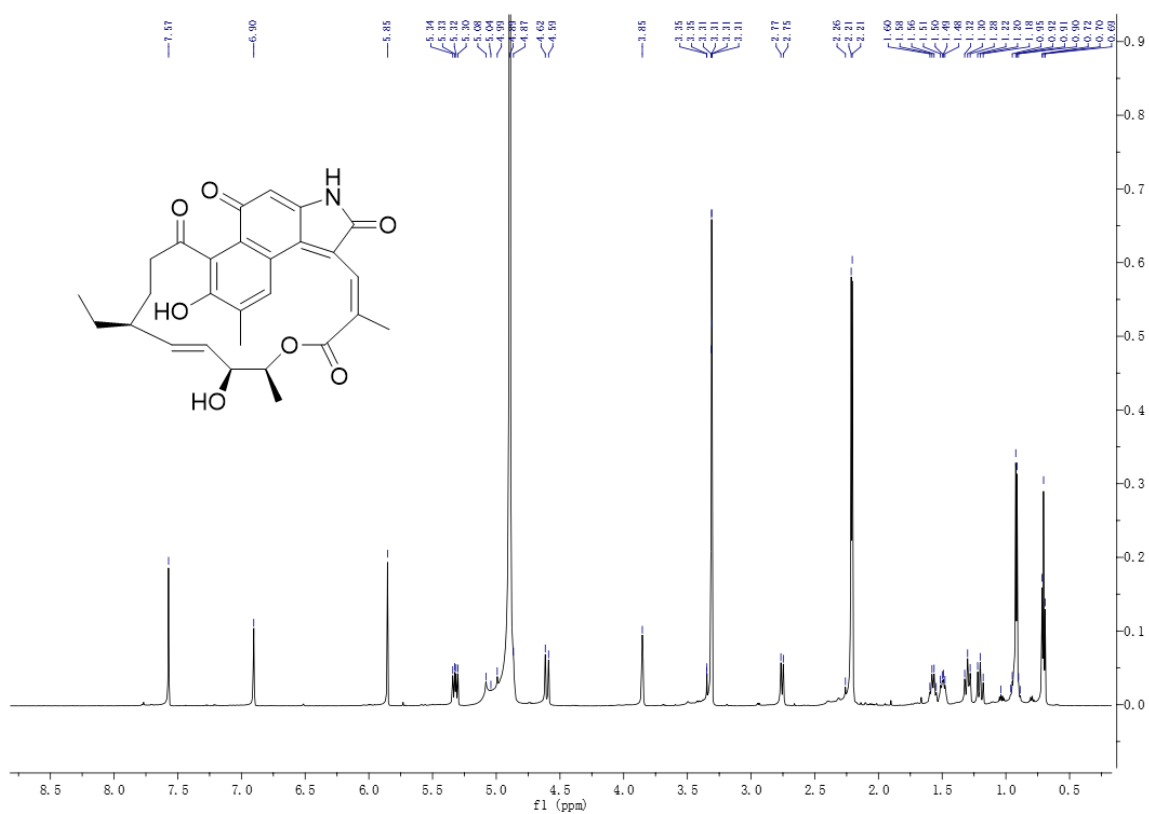

Figure S38.  $^1\text{H}$  NMR spectrum of hygrocin M (7)

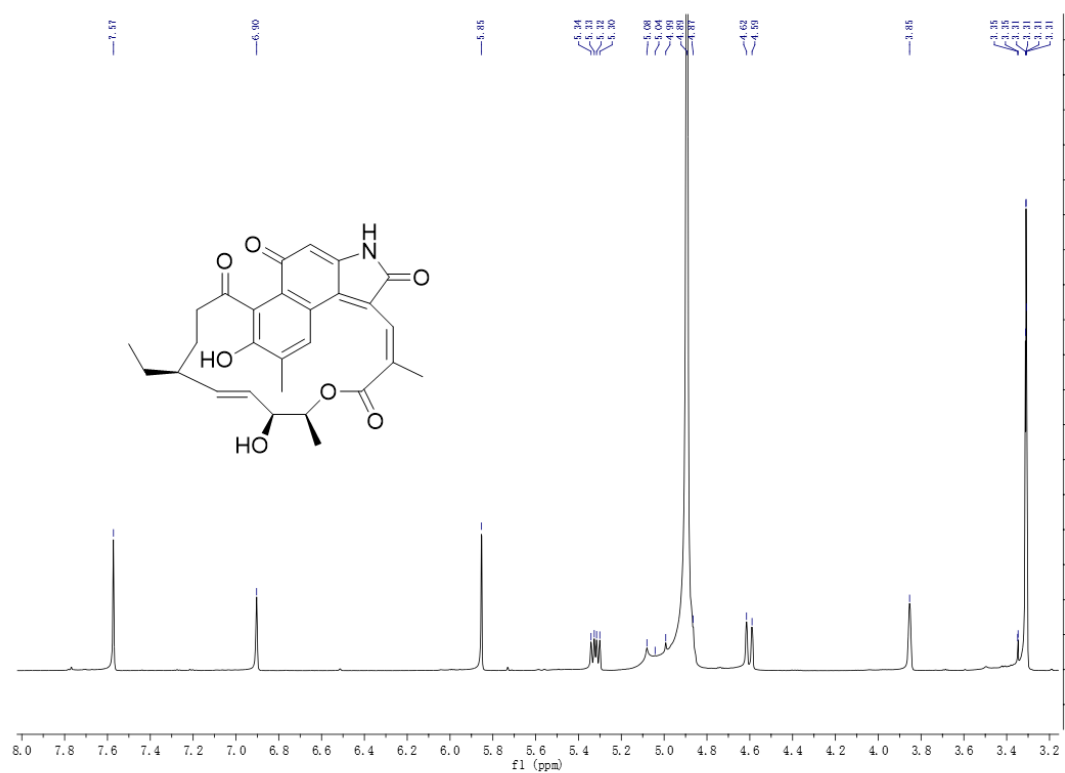

Figure S39.  $^1\text{H}$  NMR spectrum of hygrocine M (7)

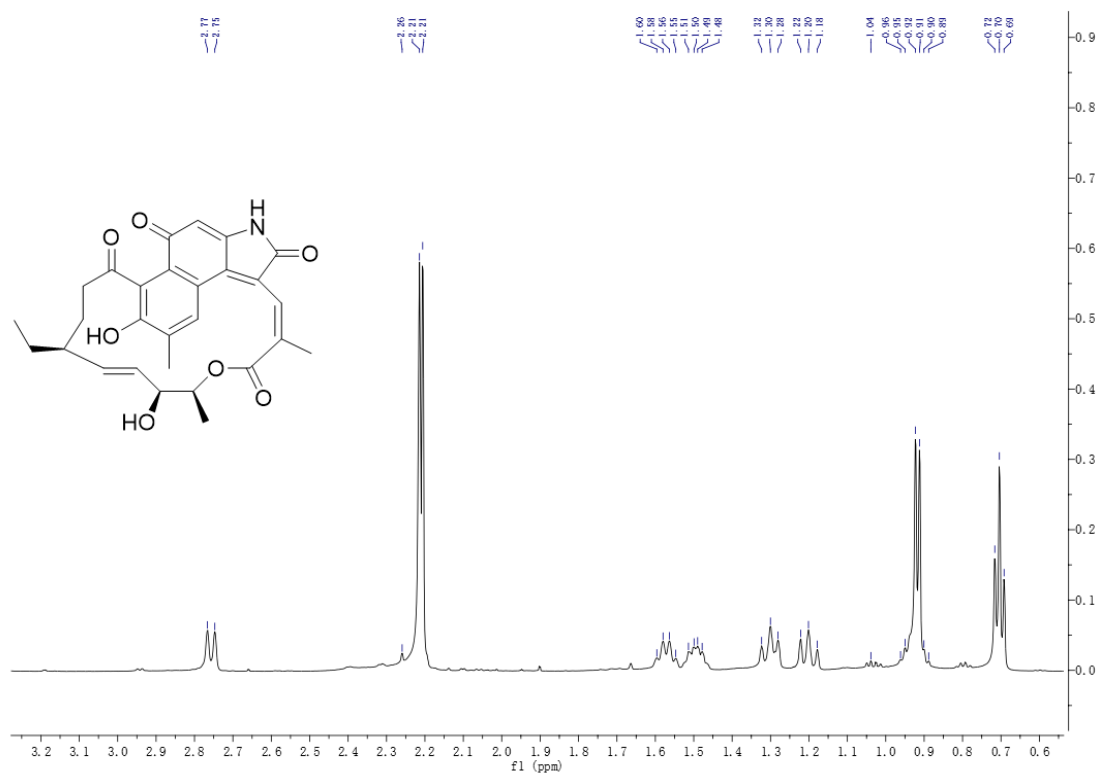

Figure S40.  $^{13}\text{C}$  NMR spectrum of hygrocinn M (7)

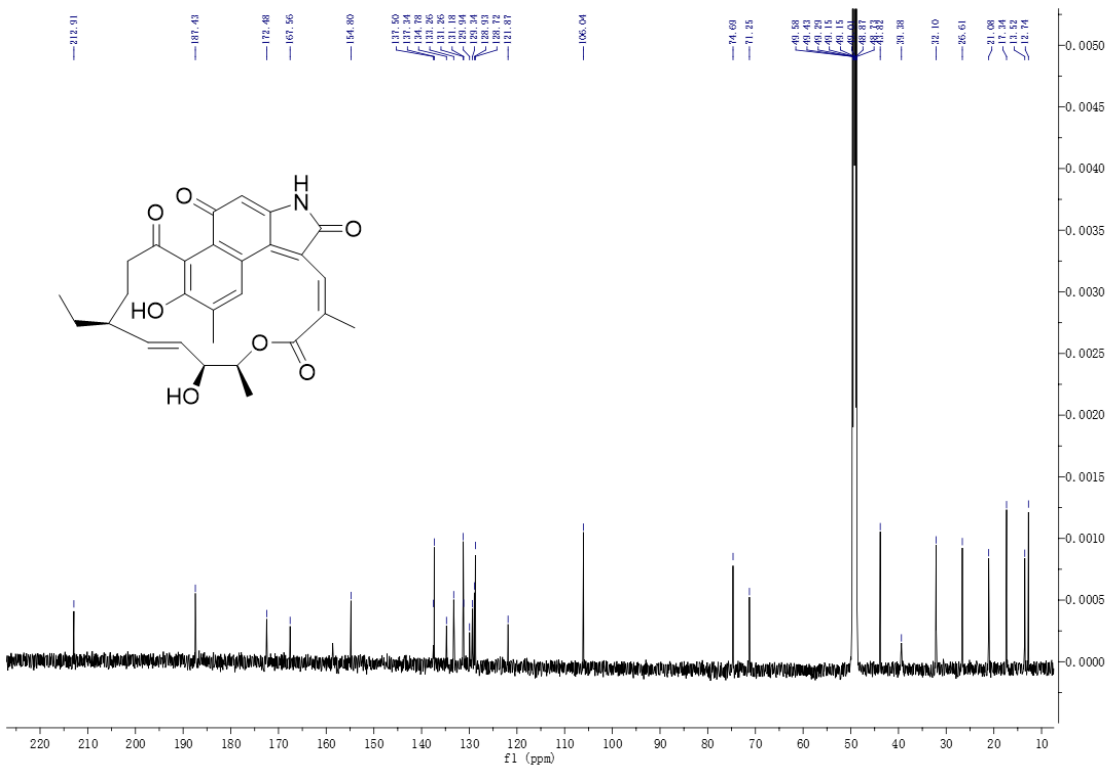

Figure S41.  $^{13}\text{C}$  NMR spectrum of hygrocin M (7)

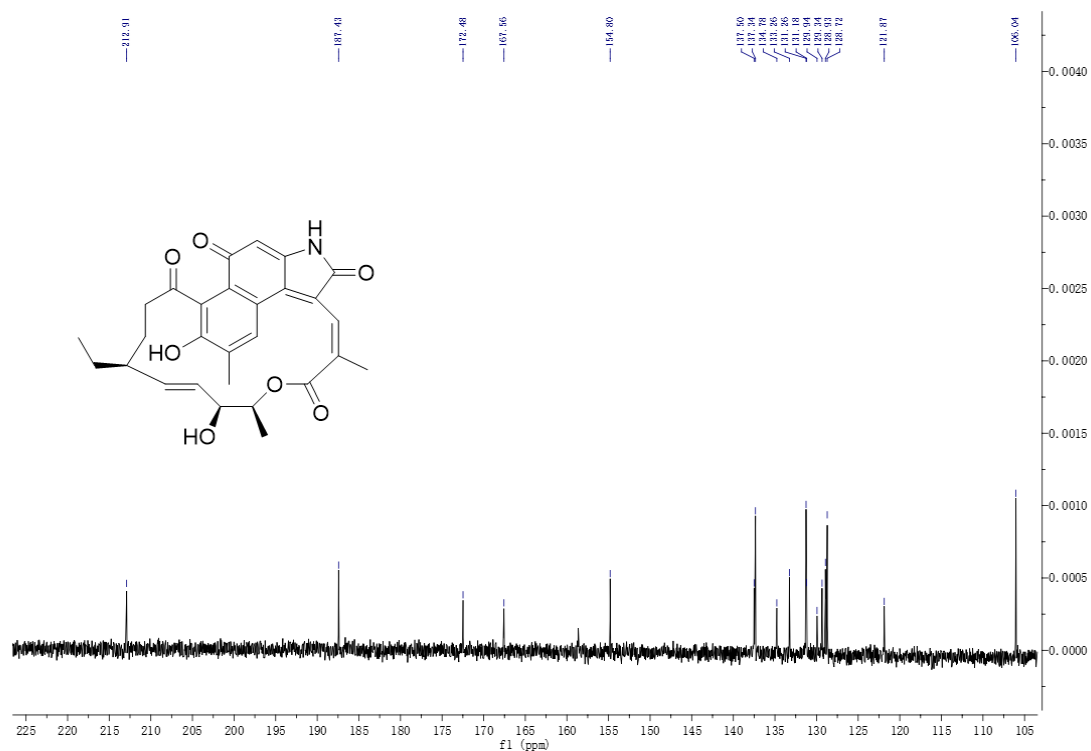

Figure S42.  $^{13}\text{C}$  NMR spectrum of hygrocin M (7)

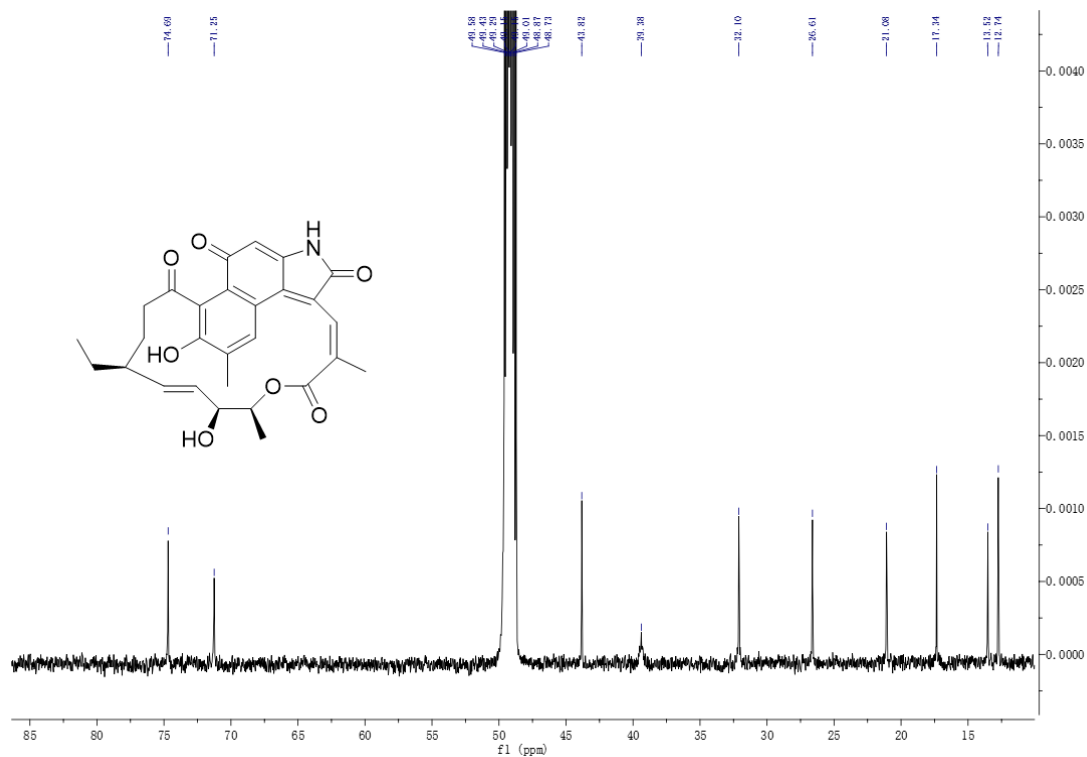



Figure S43. HMQC spectrum of hygrocin M (7)

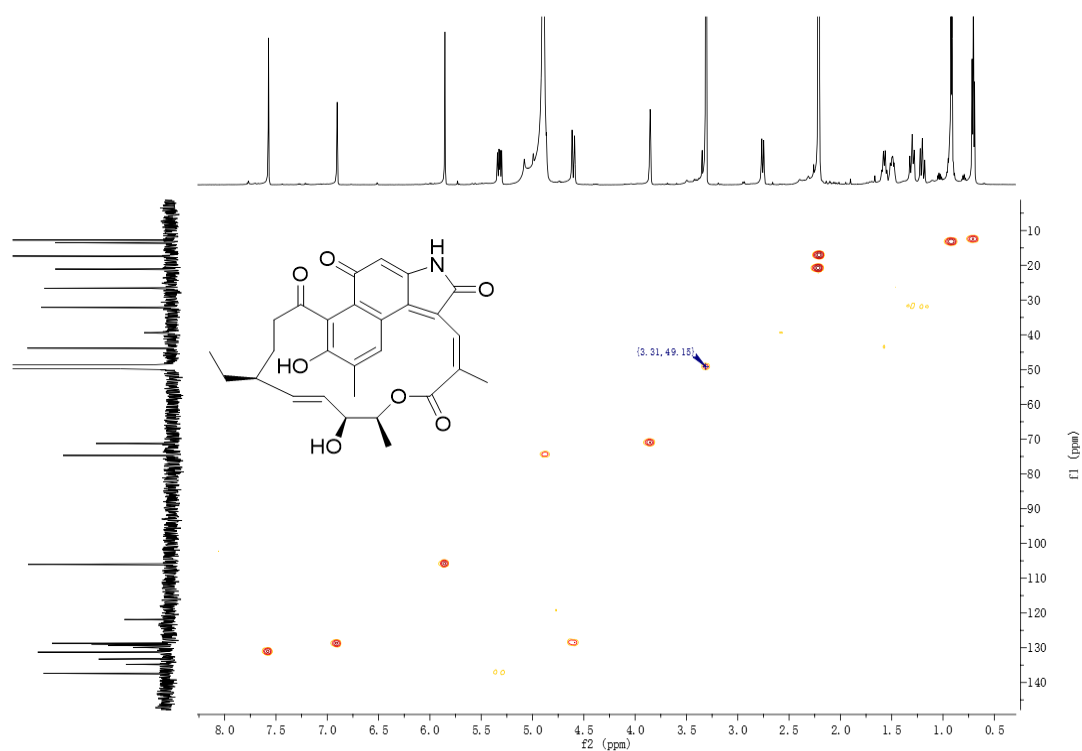

Figure S44. HMQC spectrum of hygrocin M (7)

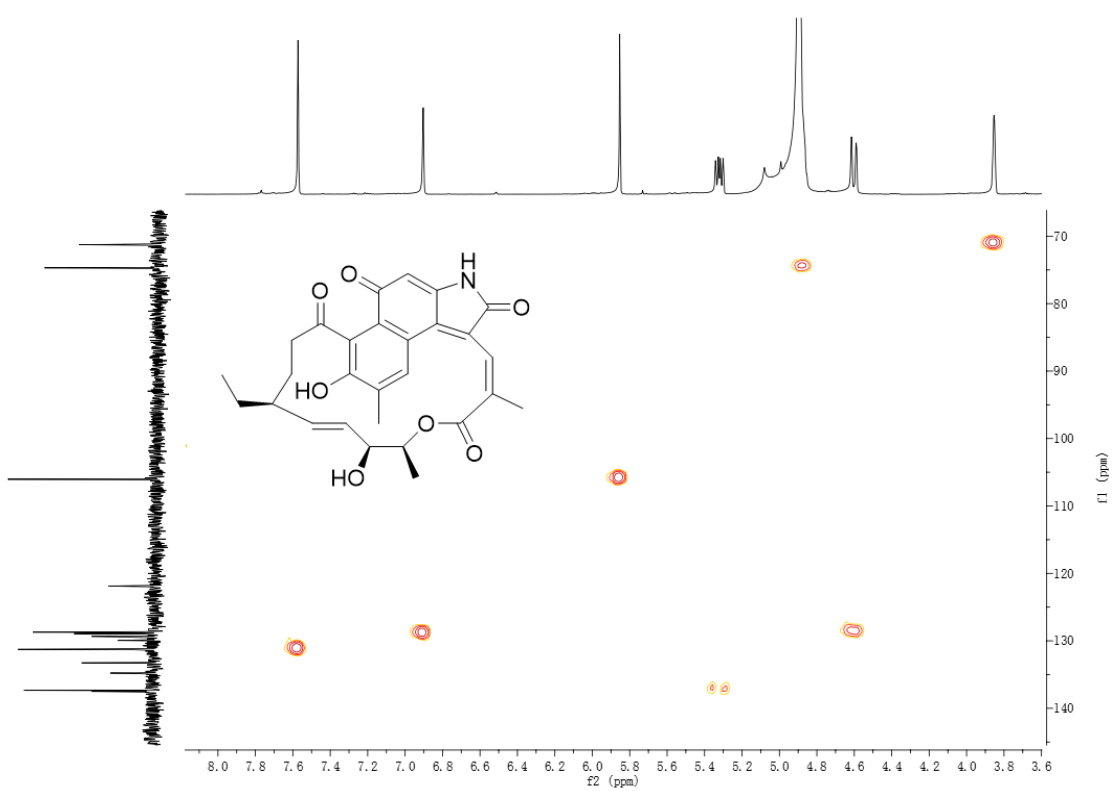

Figure S45. HMQC spectrum of hygrocin M (7)

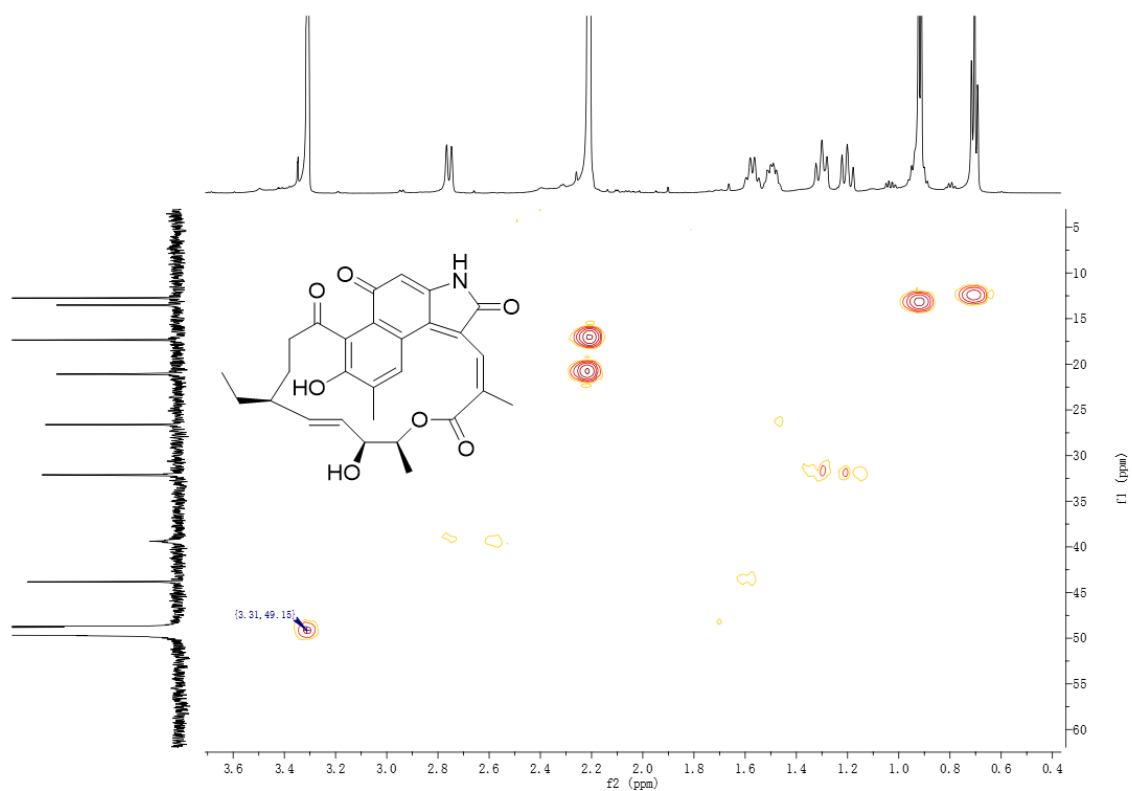

Figure S46. COSY spectrum of hygrocin M (7)

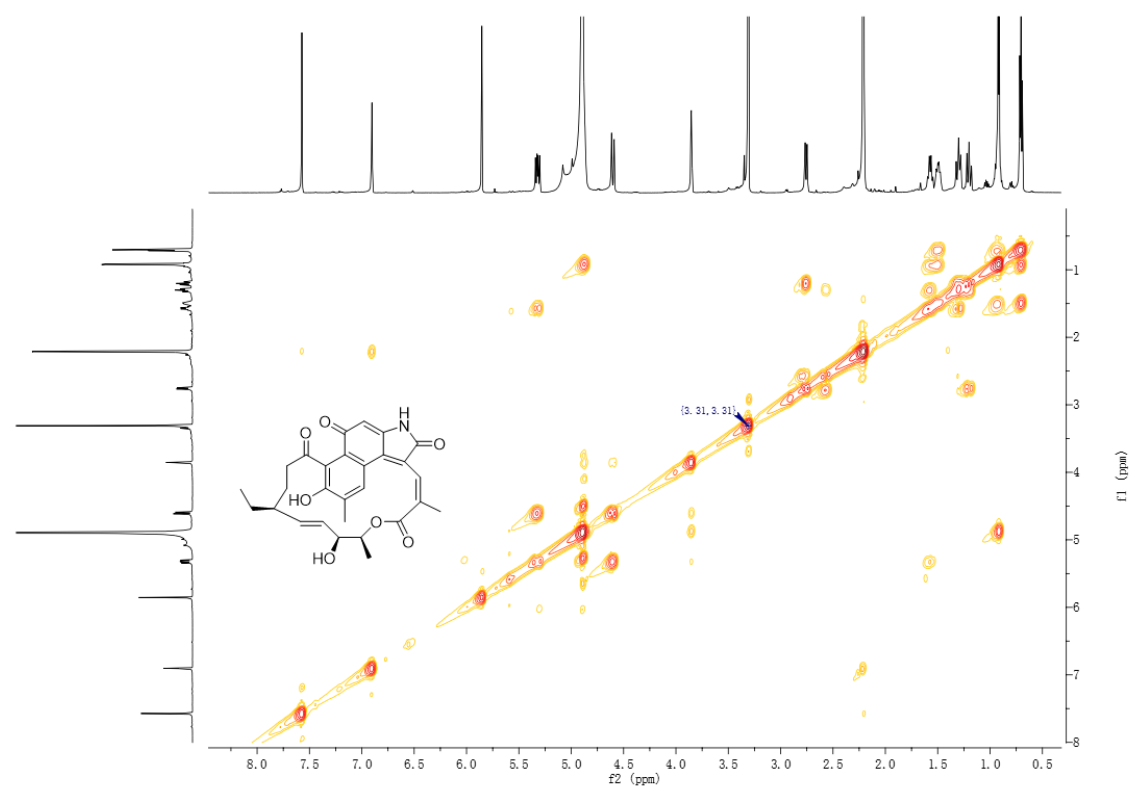

Figure S47. HMBC spectrum of hygrocin M (7)

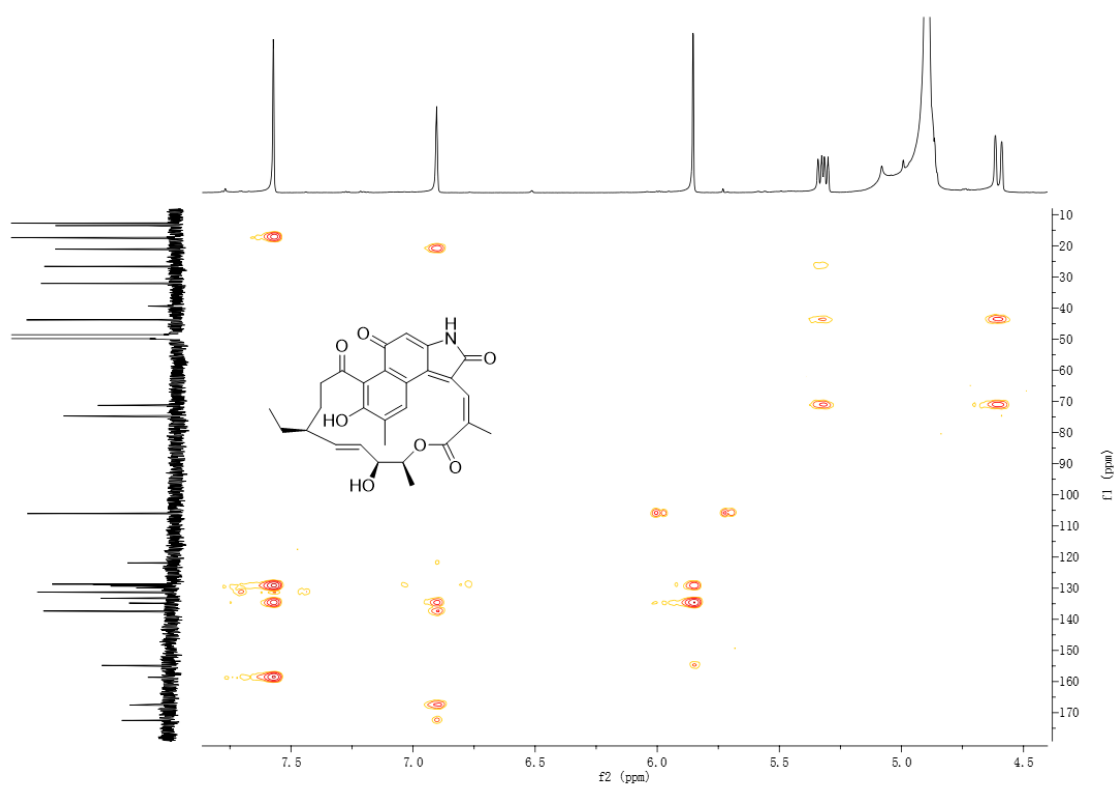

Figure S48. HMBC spectrum of hygrocin M (7)

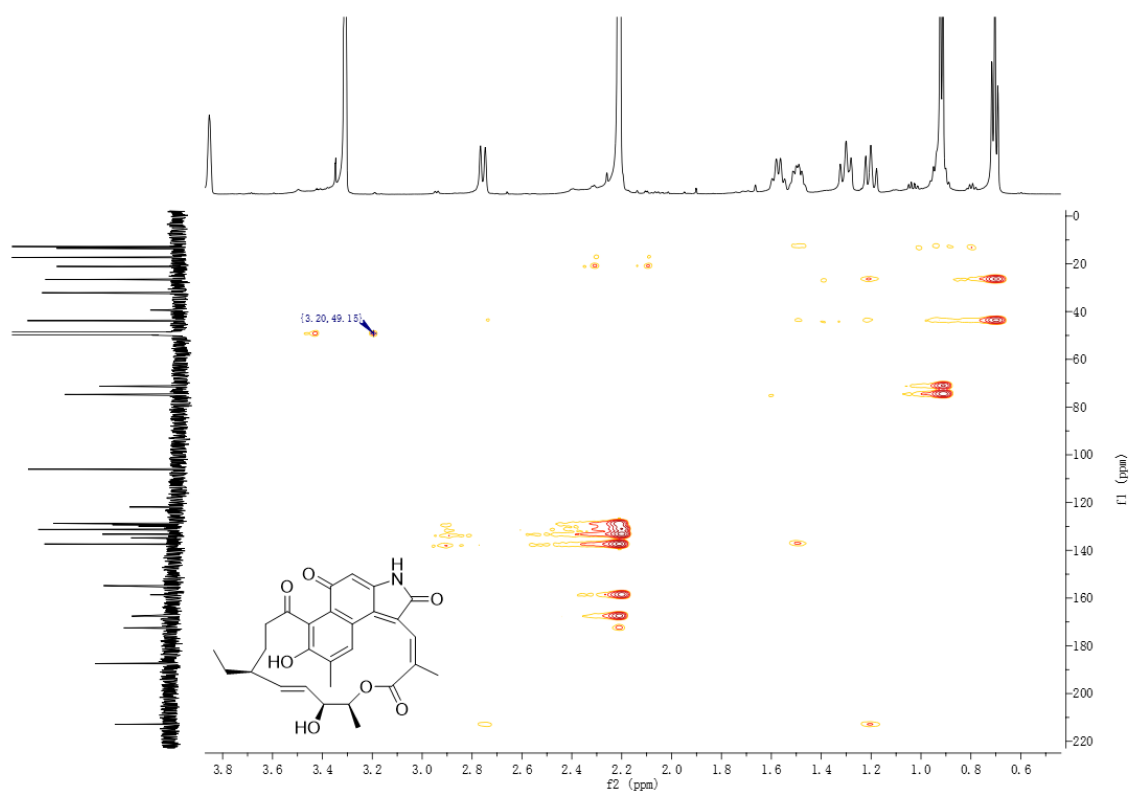

Figure S49. NOESY spectrum of hygrocin M (7)

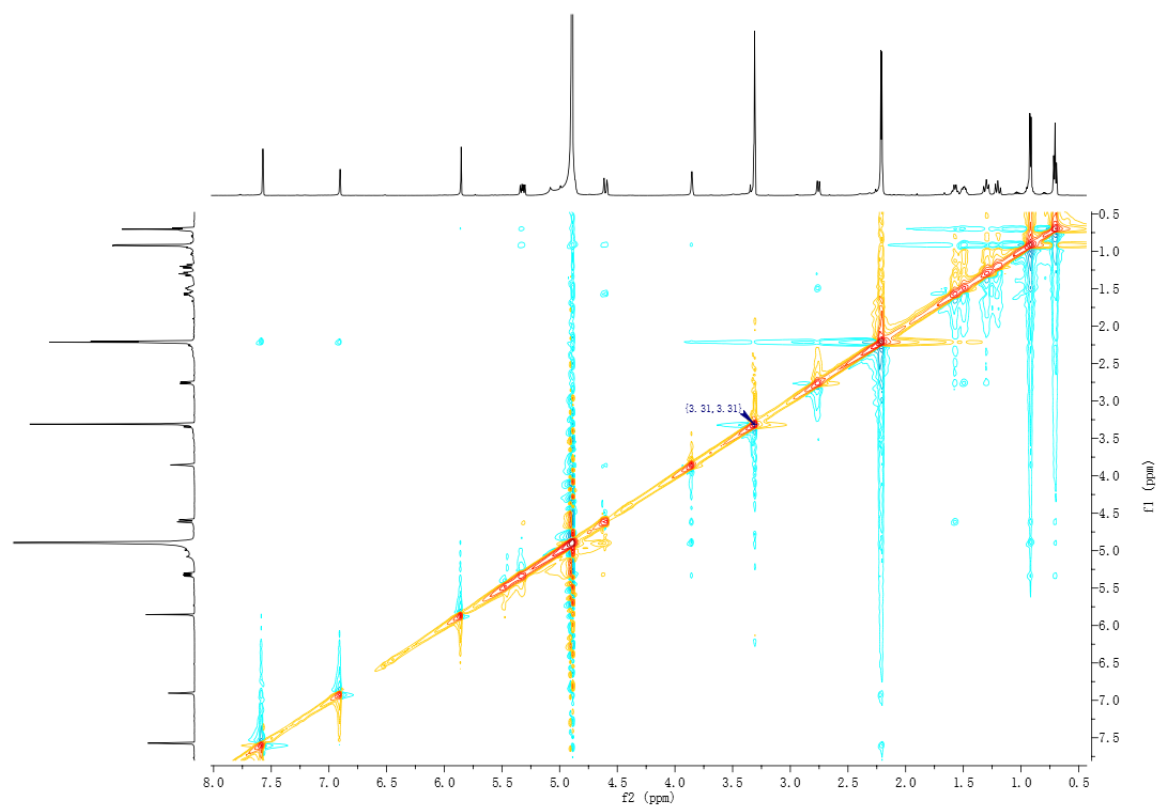

Figure S50. HRESIMS spectrum of hygrocin M (7)

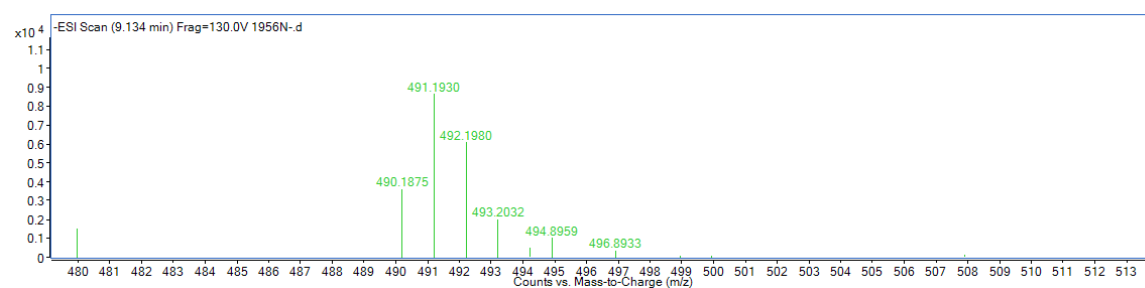

Figure S51. UV spectrum of hygrocin M (7)

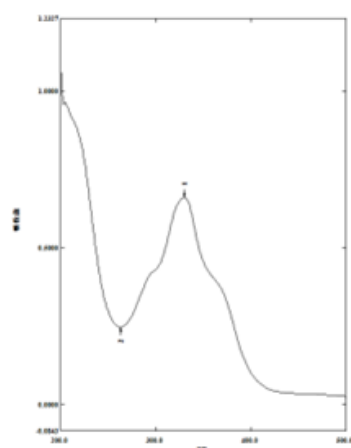

Figure S52. IR spectrum of hygrocin M (7)

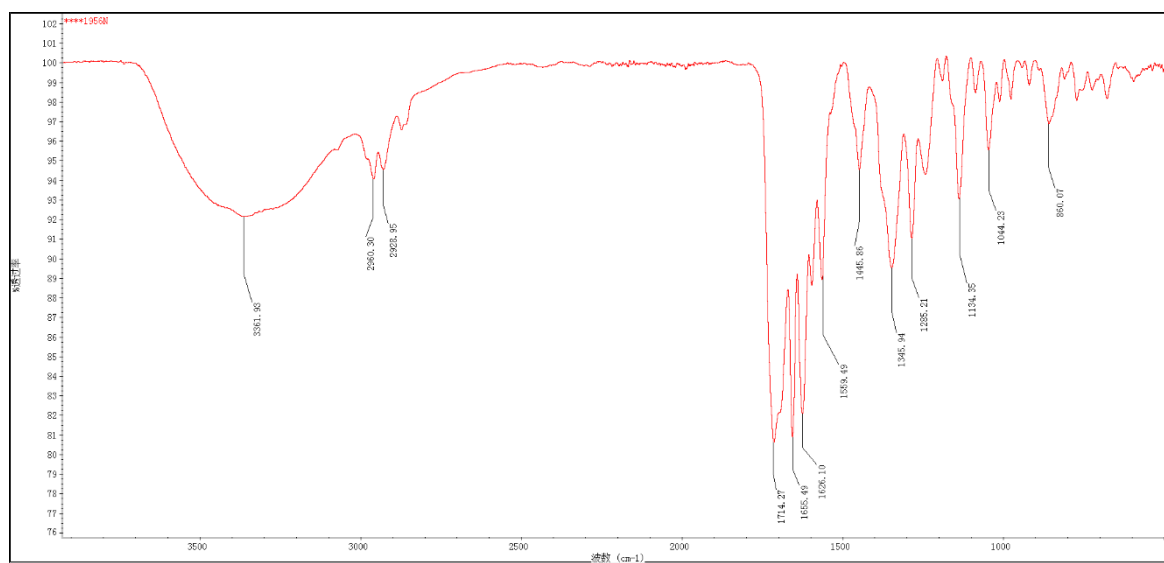

Figure S53. <sup>1</sup>H NMR spectrum of hygrocin N (8)

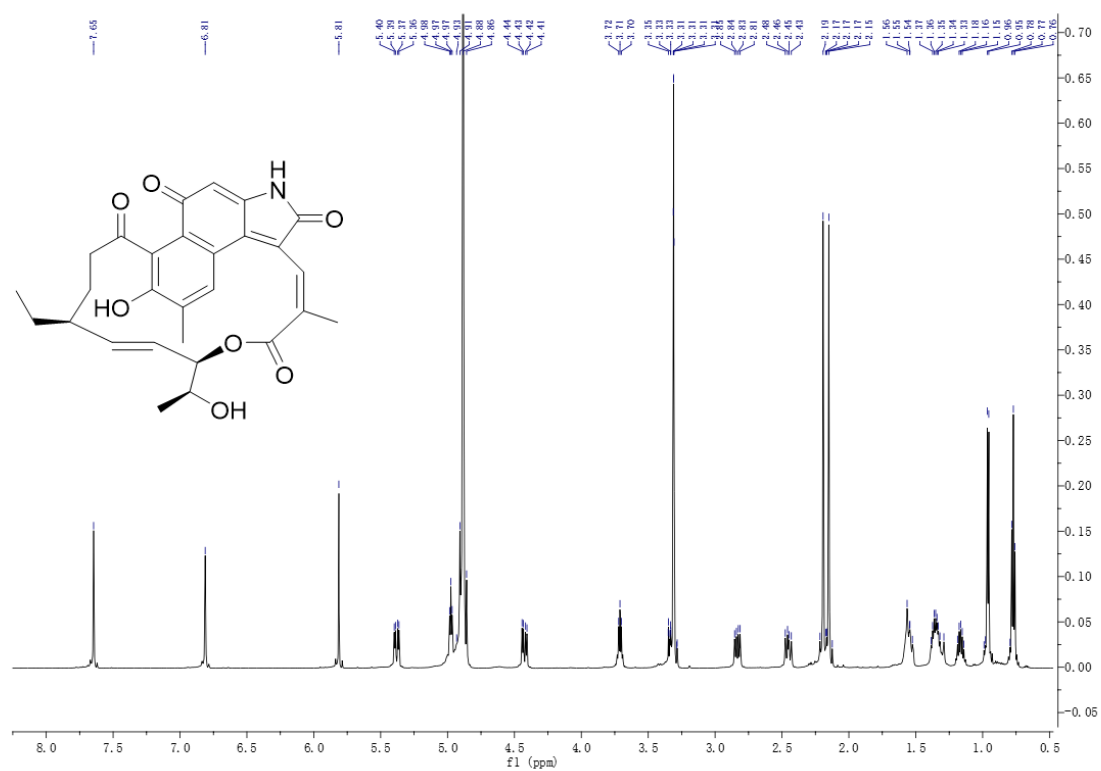

Figure S54.  $^1\text{H}$  NMR spectrum of hygrocin N (**8**)

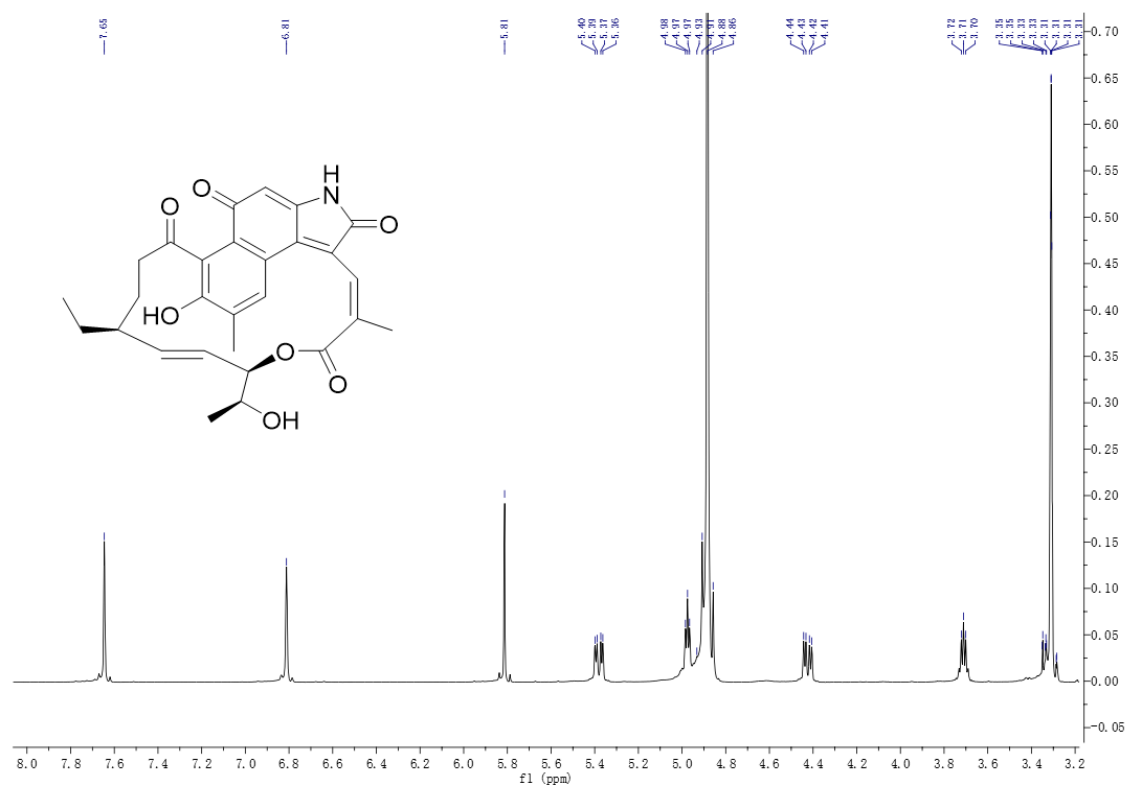

Figure S55.  $^1\text{H}$  NMR spectrum of hygrocin N (**8**)

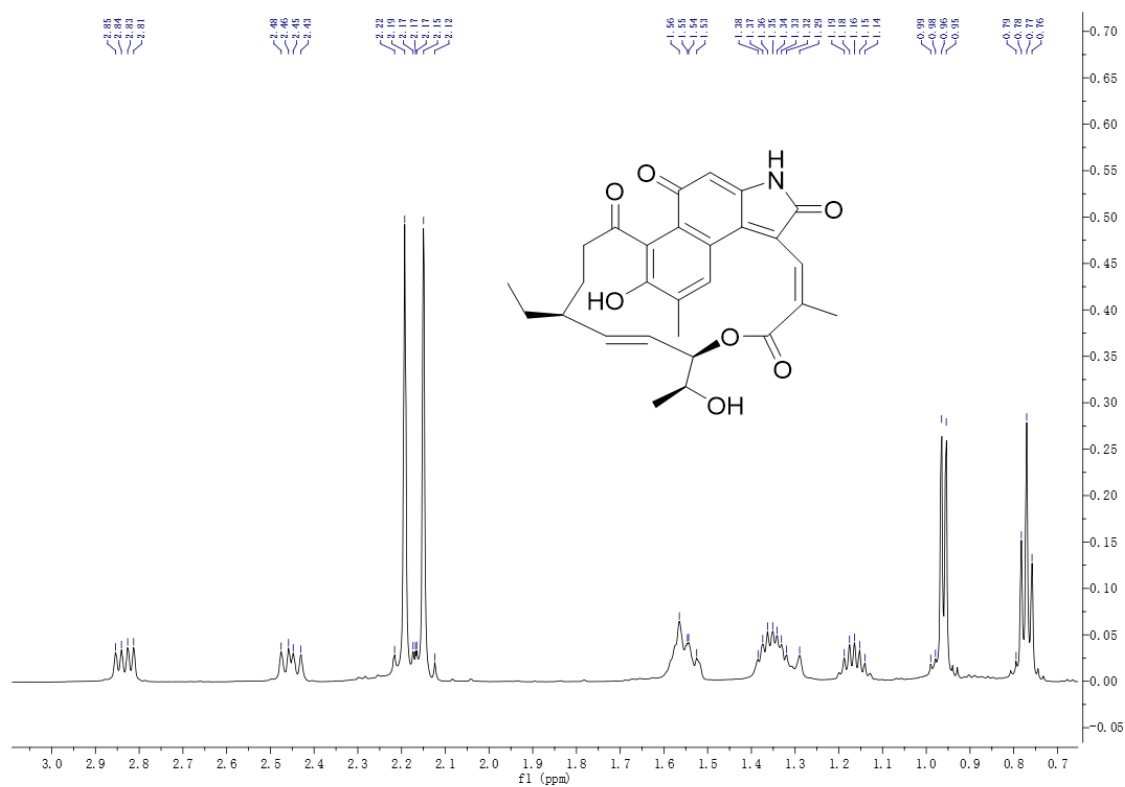

Figure S56.  $^{13}\text{C}$  NMR spectrum of hygrocin N (**8**)

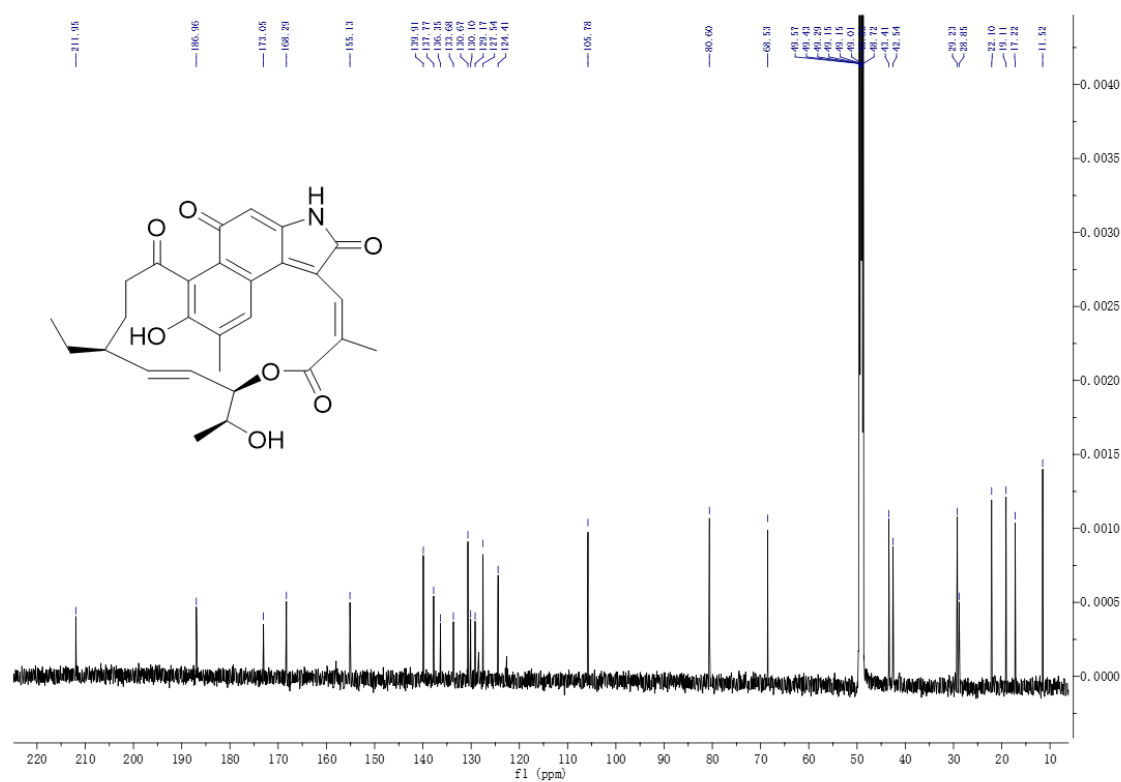

Figure S57.  $^{13}\text{C}$  NMR spectrum of hygrocin N (**8**)

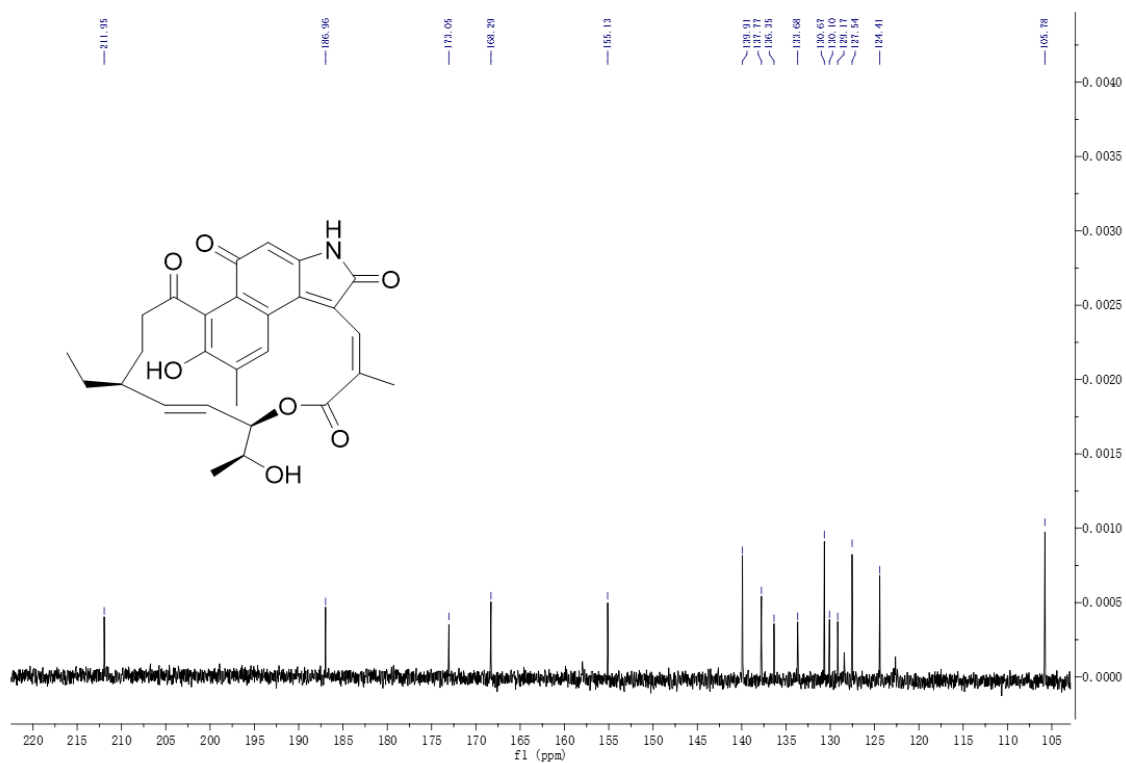

Figure S58.  $^{13}\text{C}$  NMR spectrum of hygrocin N (**8**)

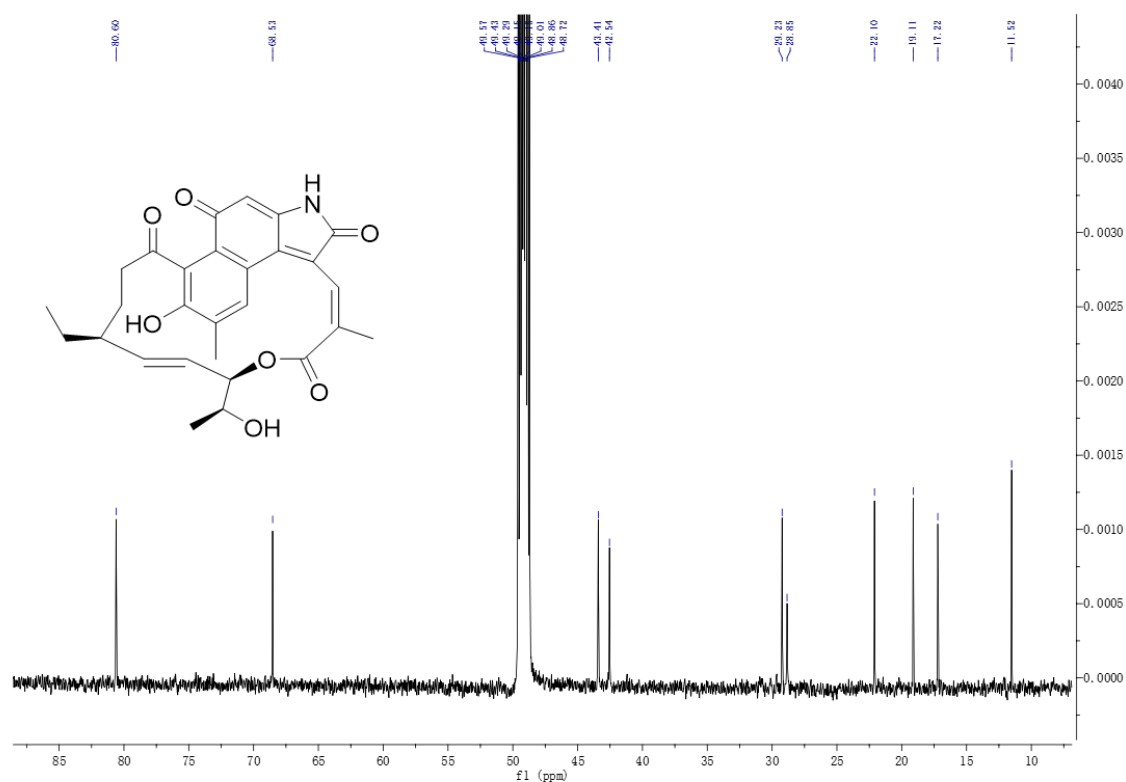

Figure S59. HMQC spectrum of hygrocin N (**8**)

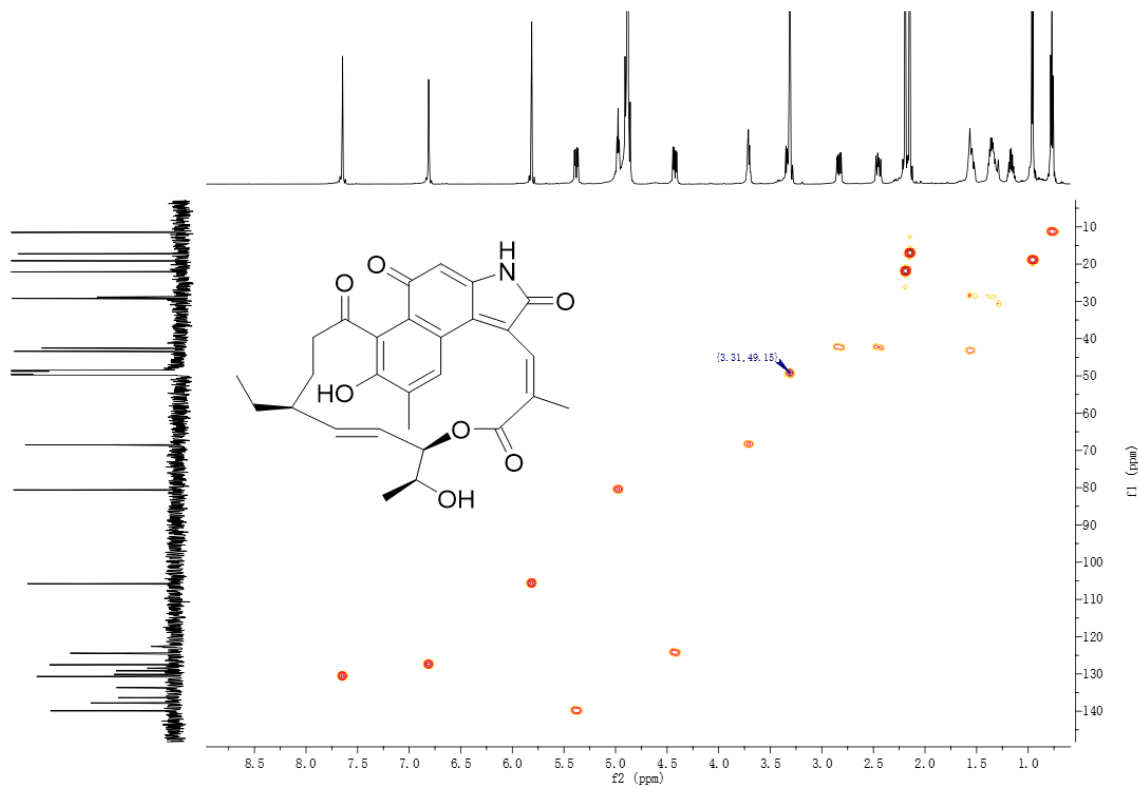



Figure S60. HMQC spectrum of hygrocin N (**8**)

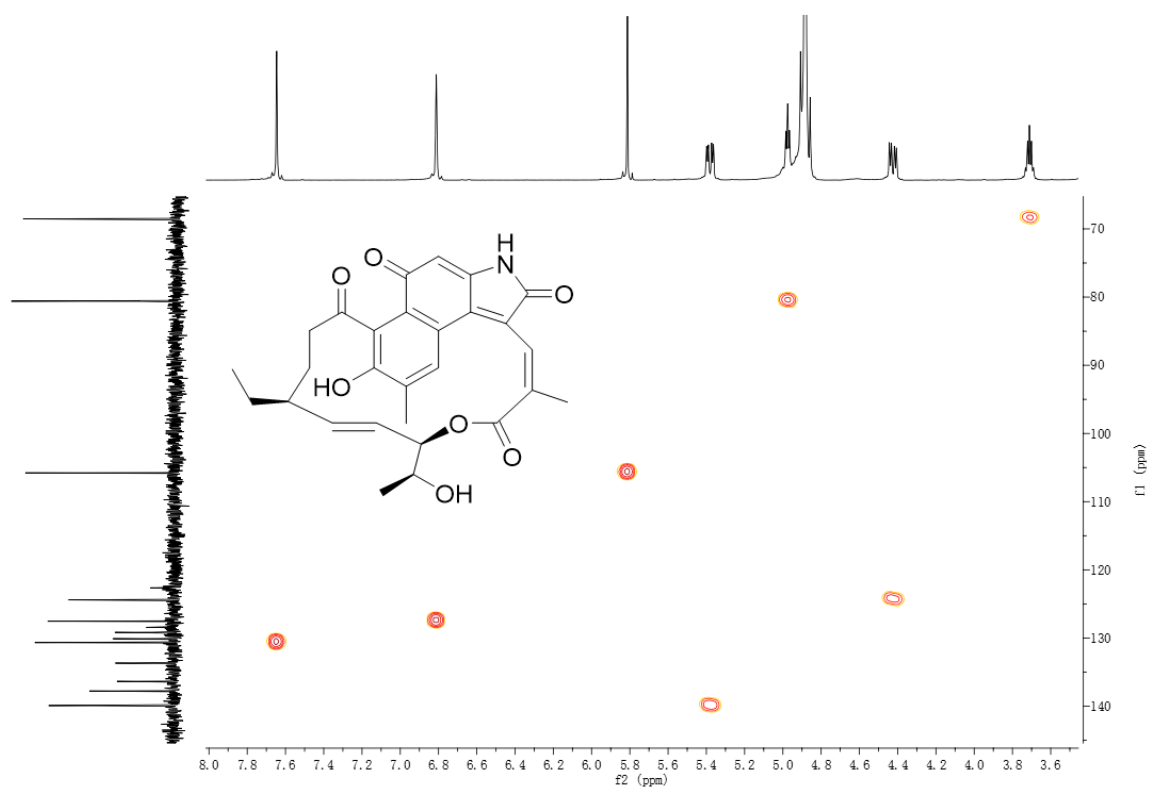

Figure S61. HMQC spectrum of hygrocin N (**8**)

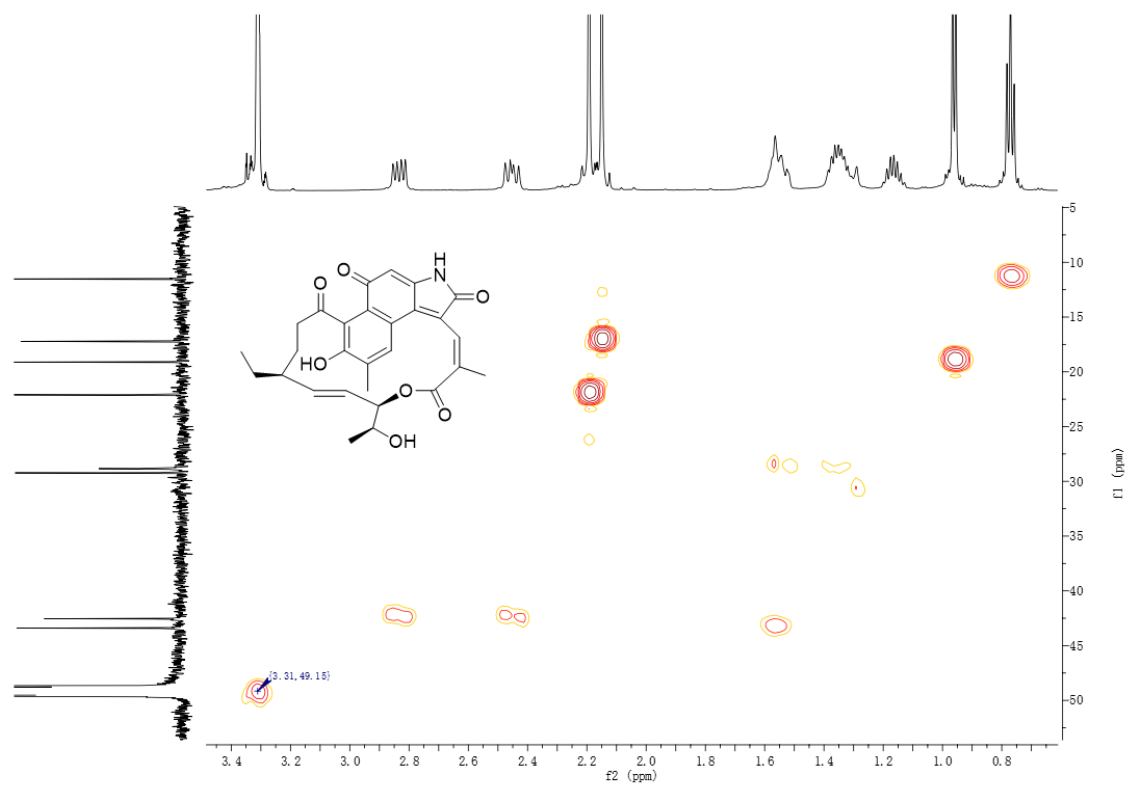

Figure S62. COSY spectrum of hygrocin N (8)

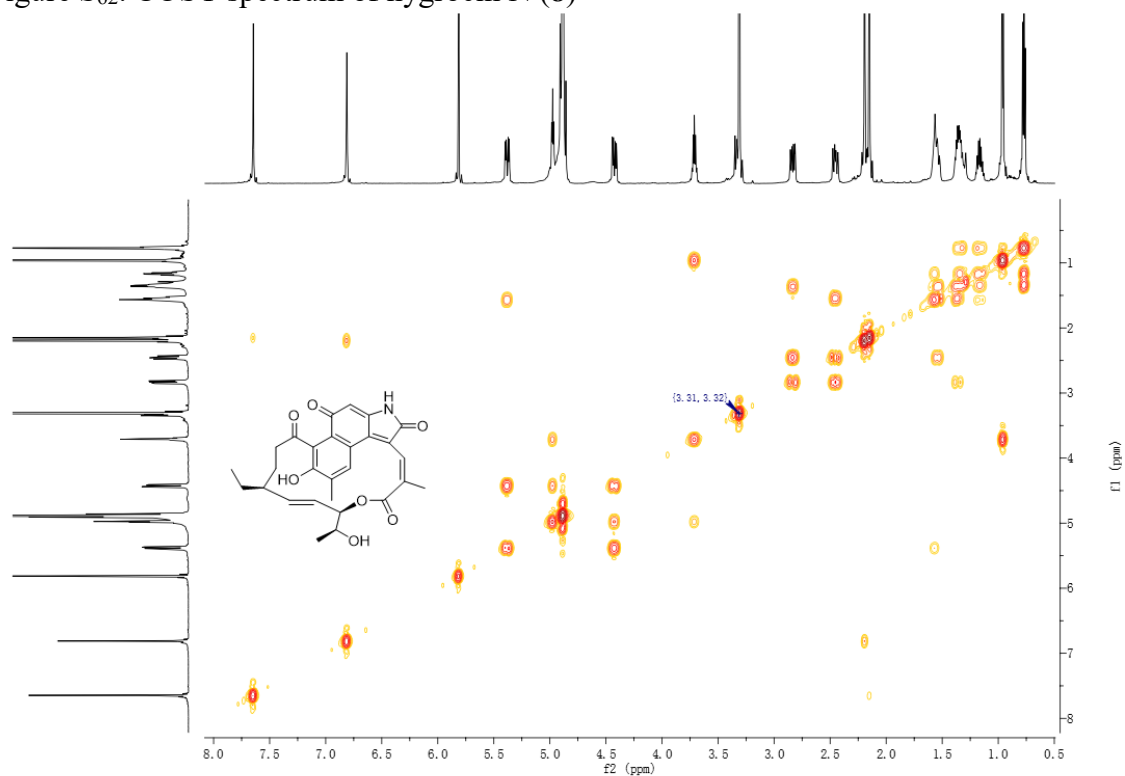

Figure S63. HMBC spectrum of hygrocin N (8)

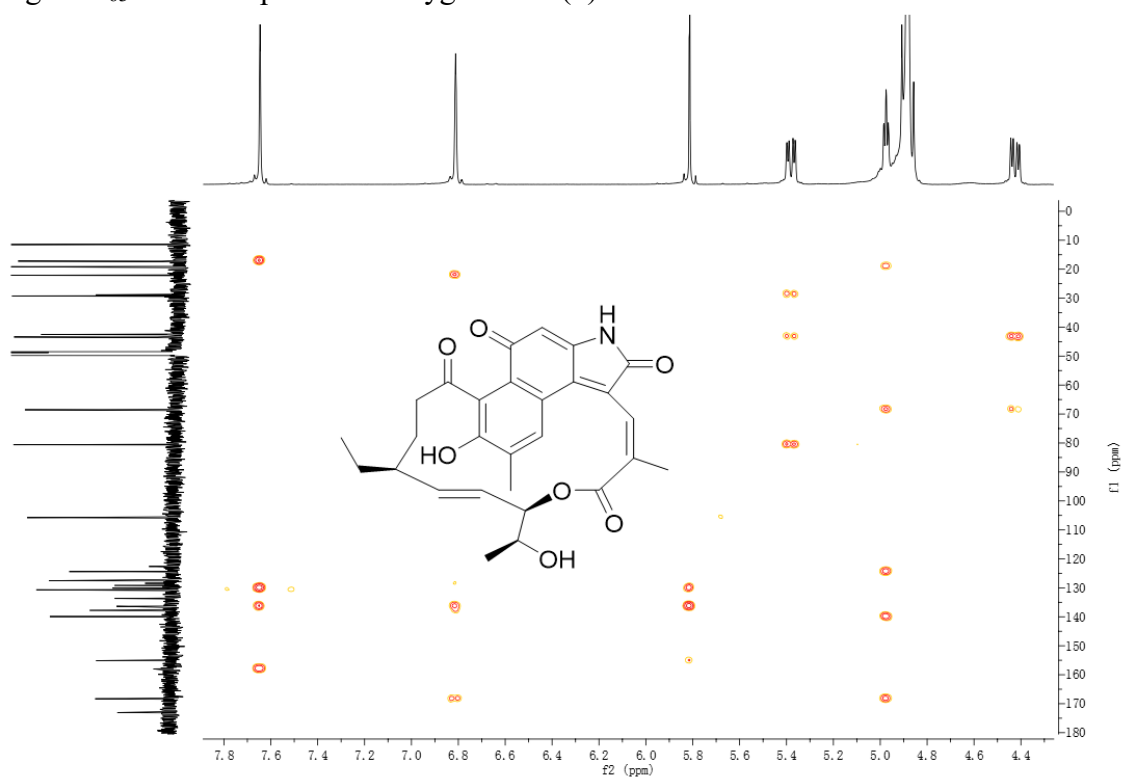

Figure S64. HMBC spectrum of hygrocin N (**8**)

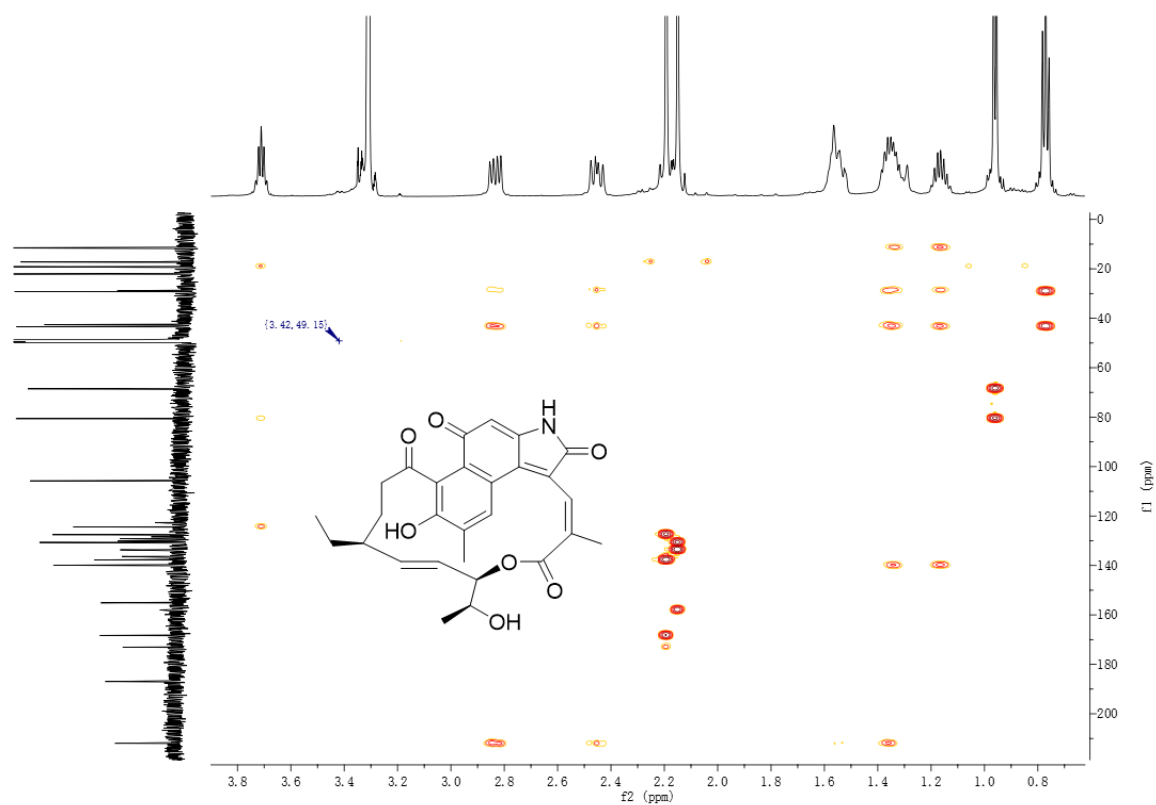

Figure S65. NOESY spectrum of hygrocin N (**8**)

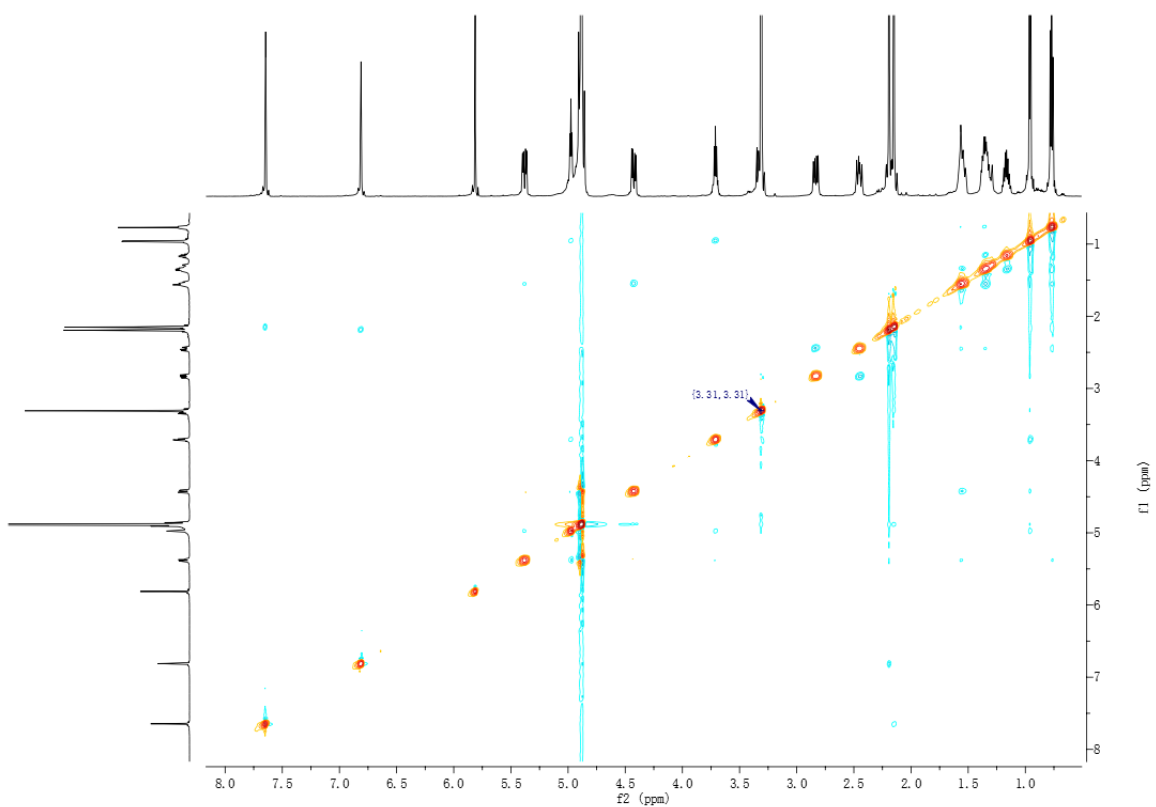

Figure S66. HRESIMS spectrum of hygrocin N (8)

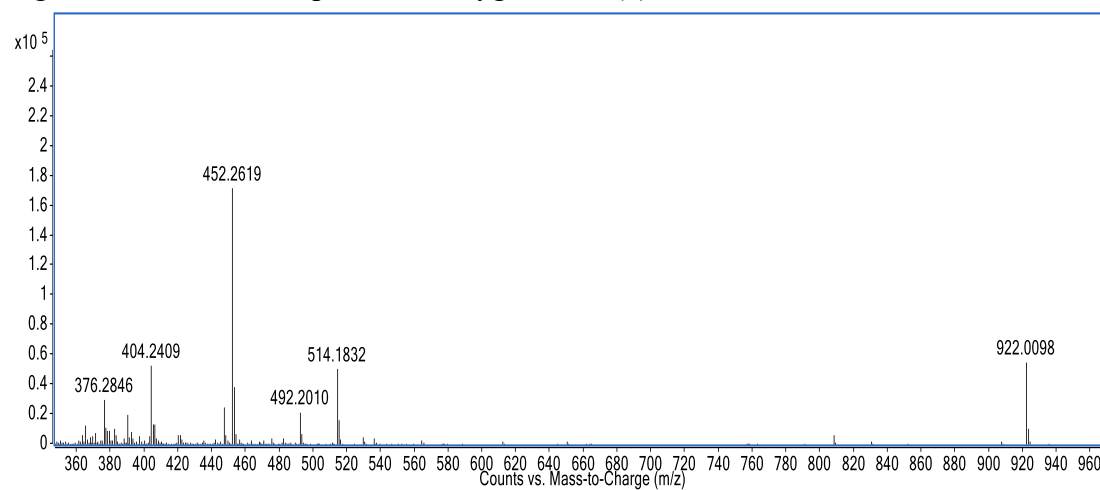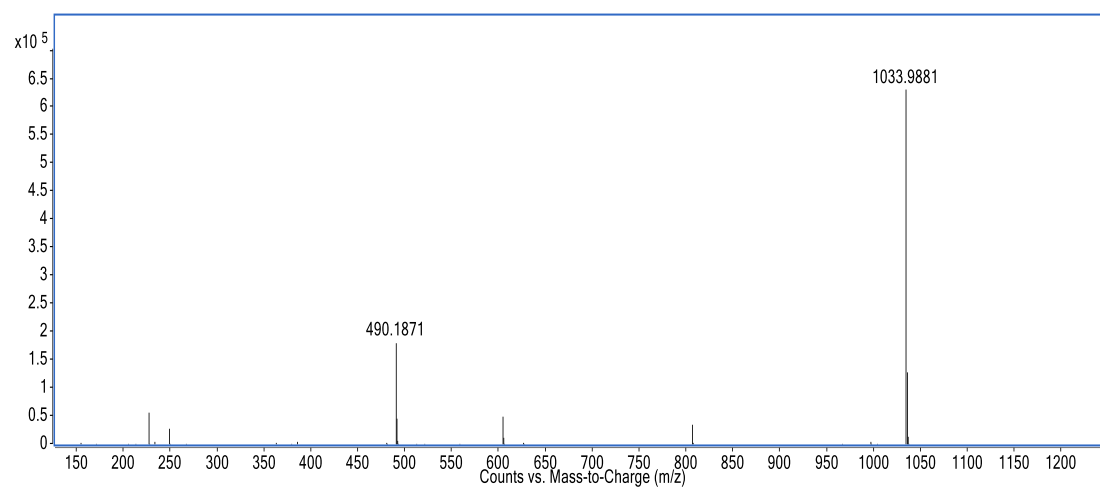

Figure S67. UV spectrum of hygrocin N (8)

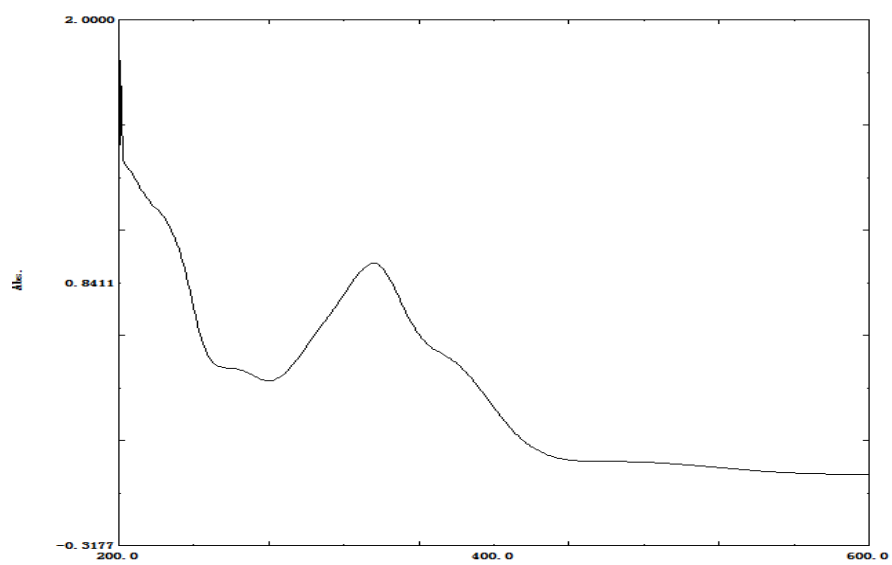

Figure S68. IR spectrum of hygrocin N (**8**)

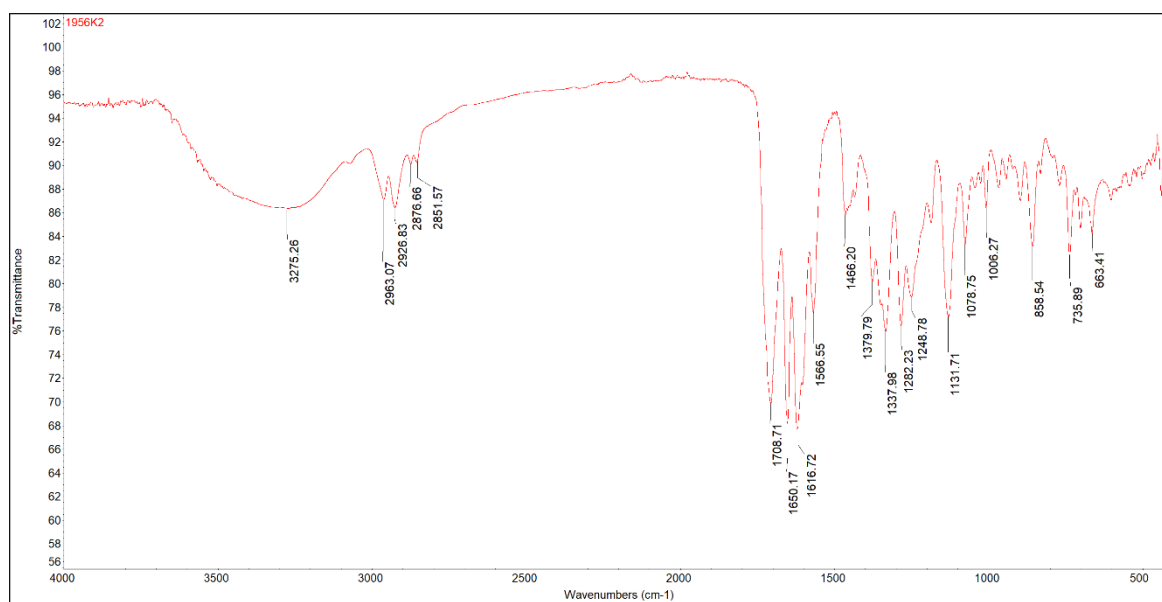

Figure S69. <sup>1</sup>H NMR spectrum of **8s** (600 MHz, in MeOH-*d*<sub>4</sub>)

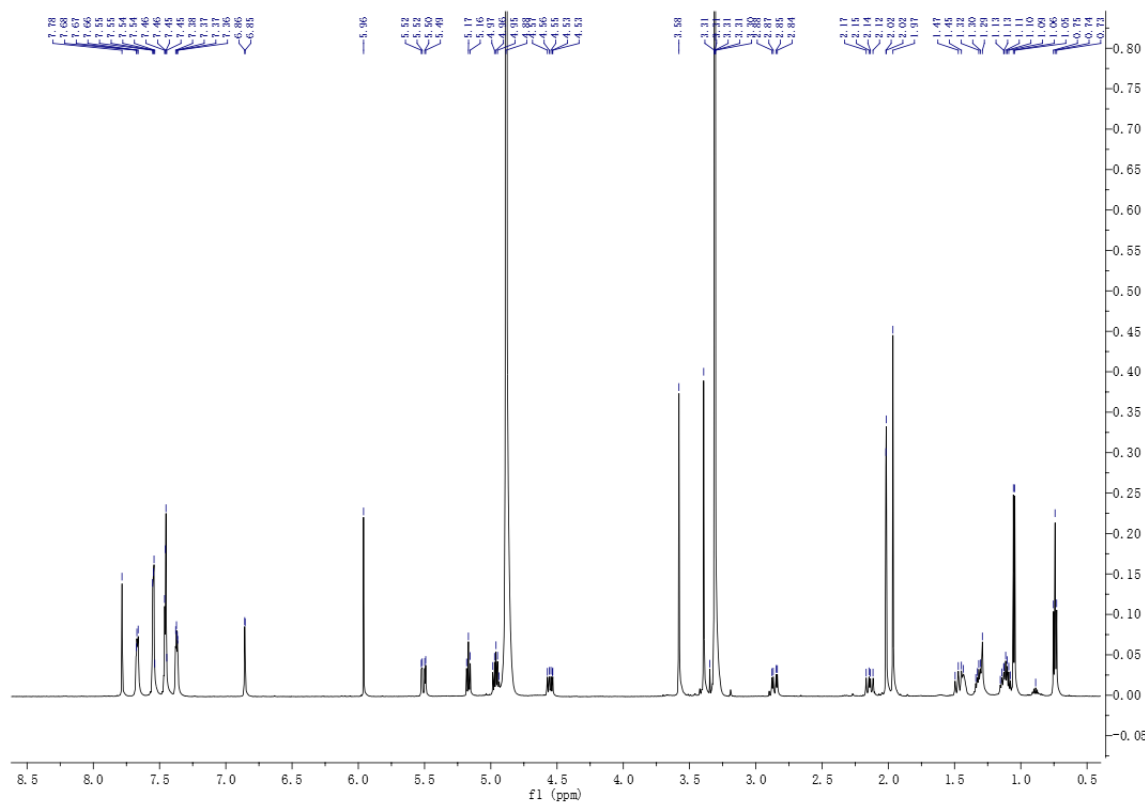

Figure S<sub>70</sub>. HRESIMS spectrum of **8s**

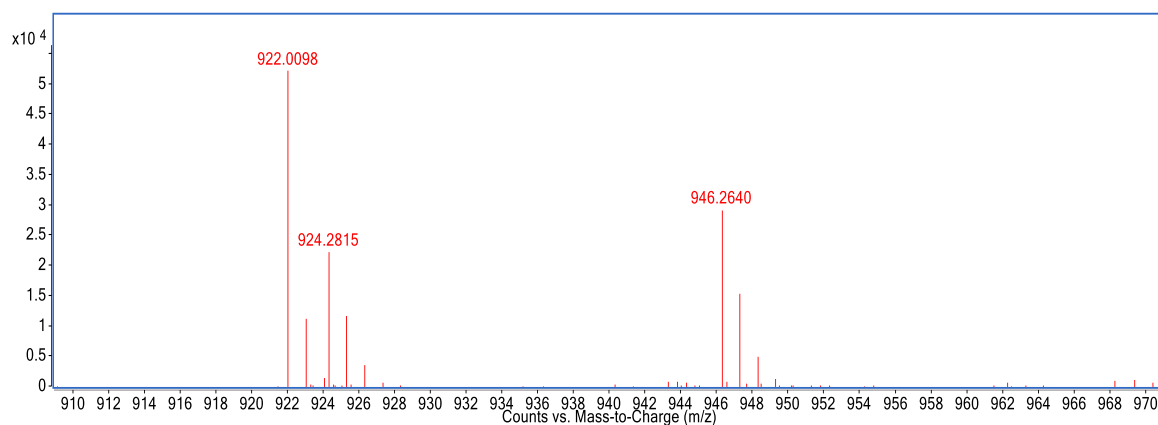

Figure S71.  $^1\text{H}$  NMR spectrum of **8r** (600 MHz, in  $\text{MeOH-}d_4$ )

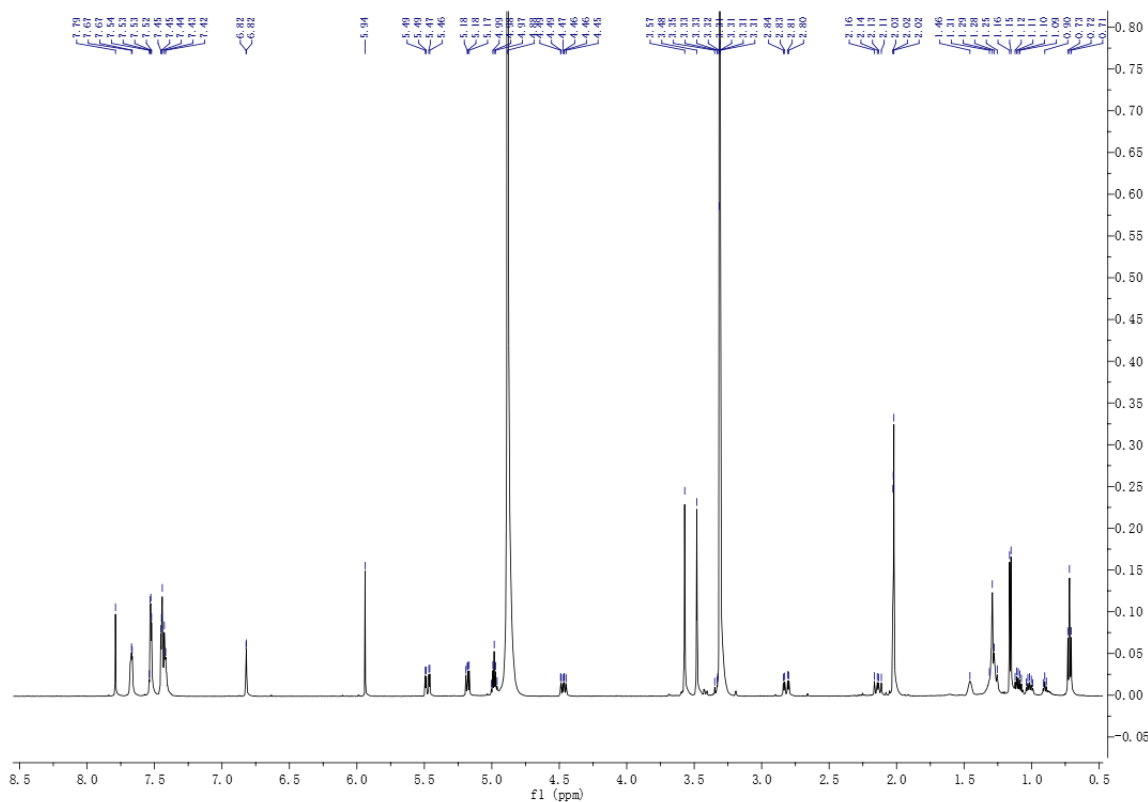

Figure S<sub>72</sub>. HRESIMS spectrum of **8r**

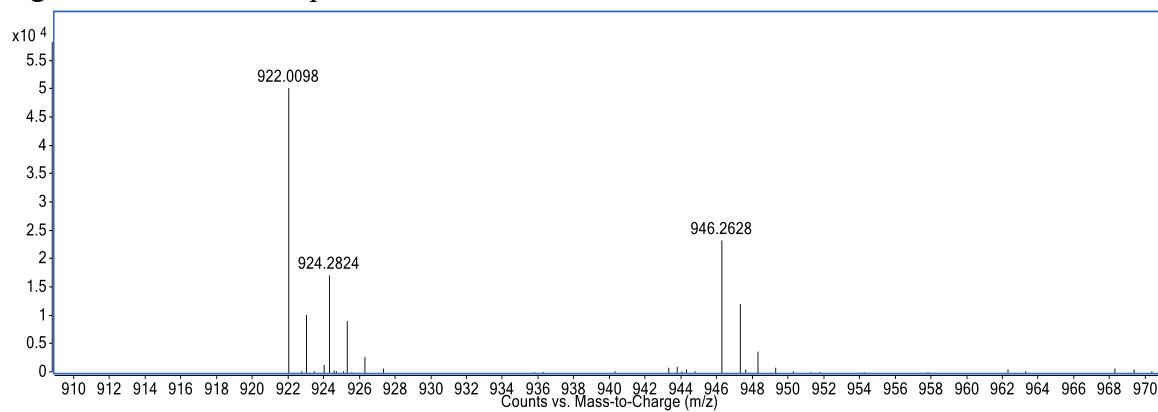

Figure S73.  $^1\text{H}$  NMR spectrum of hygrocin O (9)

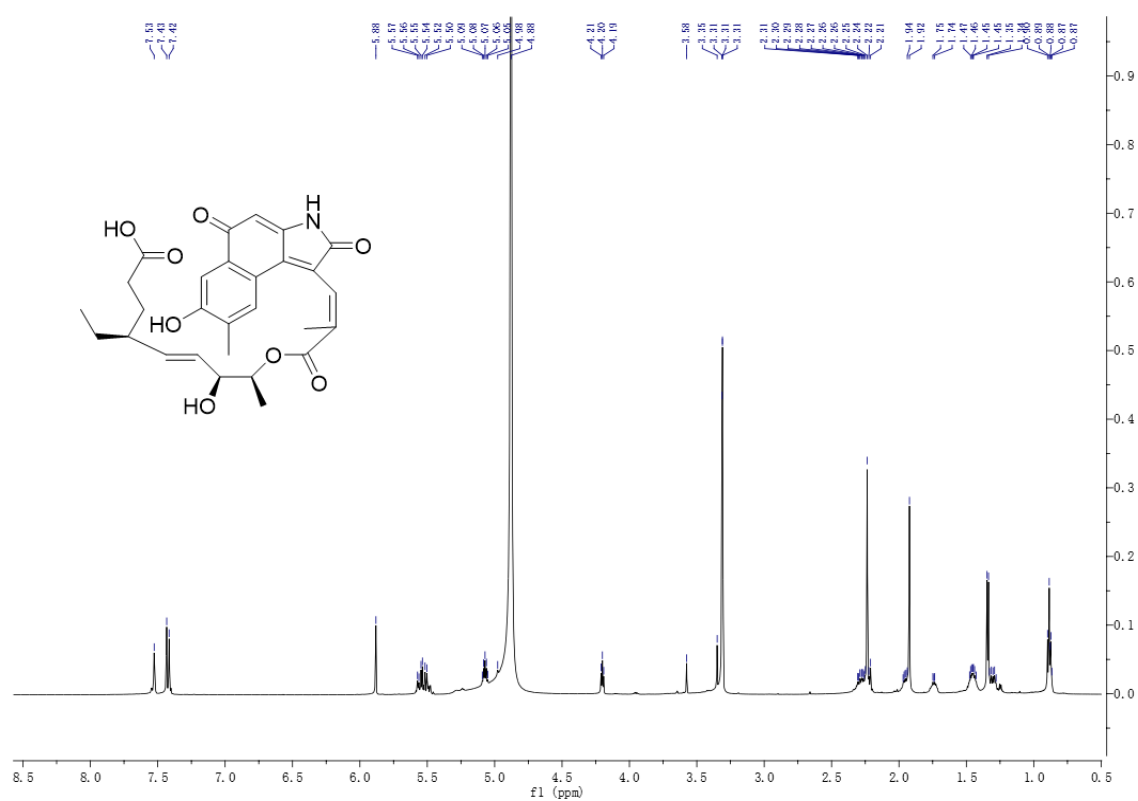

Figure S74.  $^1\text{H}$  NMR spectrum of hygrocin O (9)

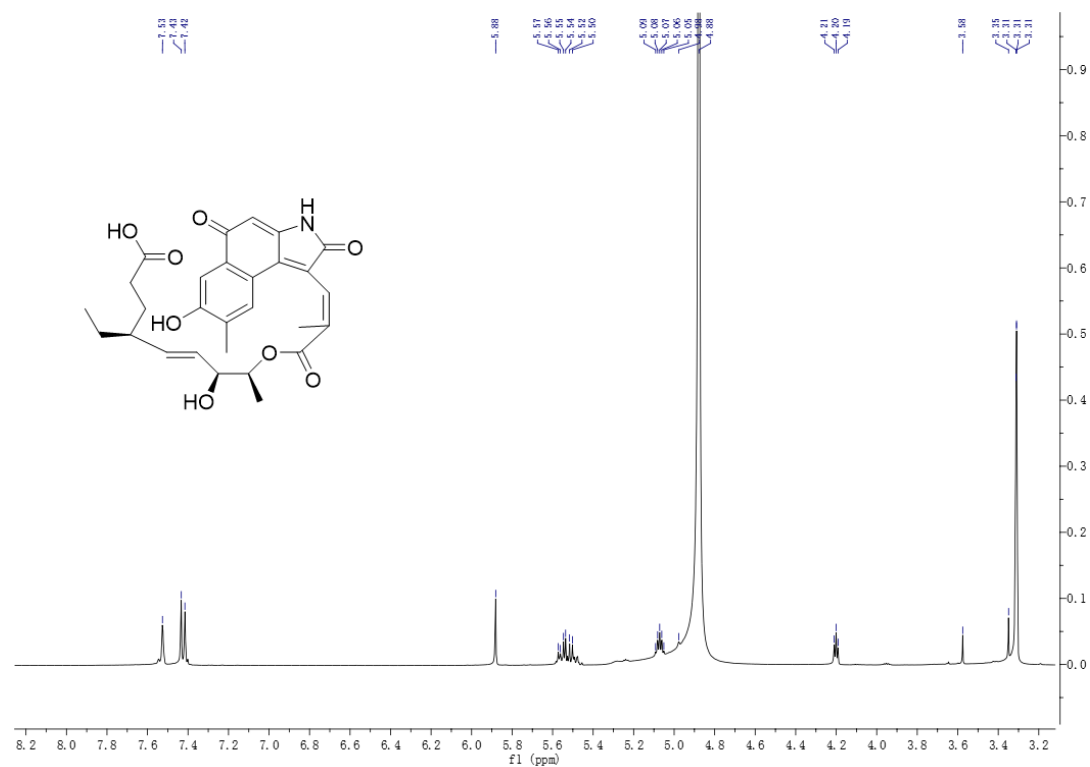

Figure S75.  $^1\text{H}$  NMR spectrum of hygrocin O (9)

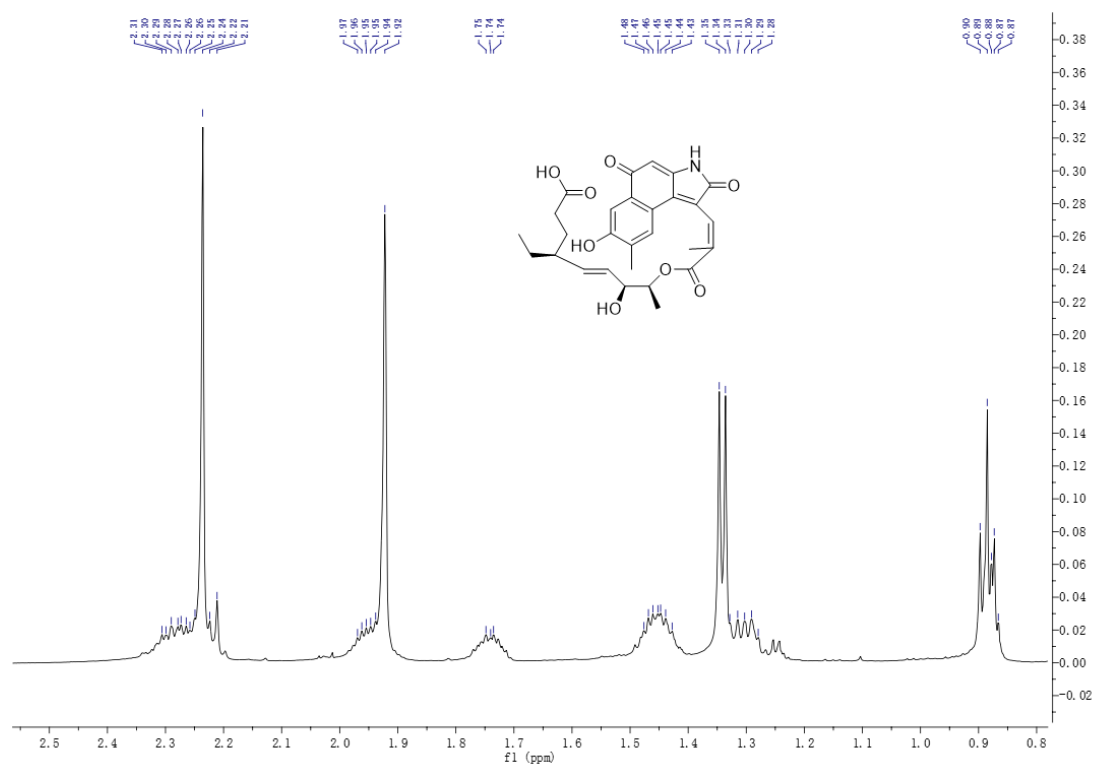

Figure S76.  $^{13}\text{C}$  NMR spectrum of hygrocin O (9)

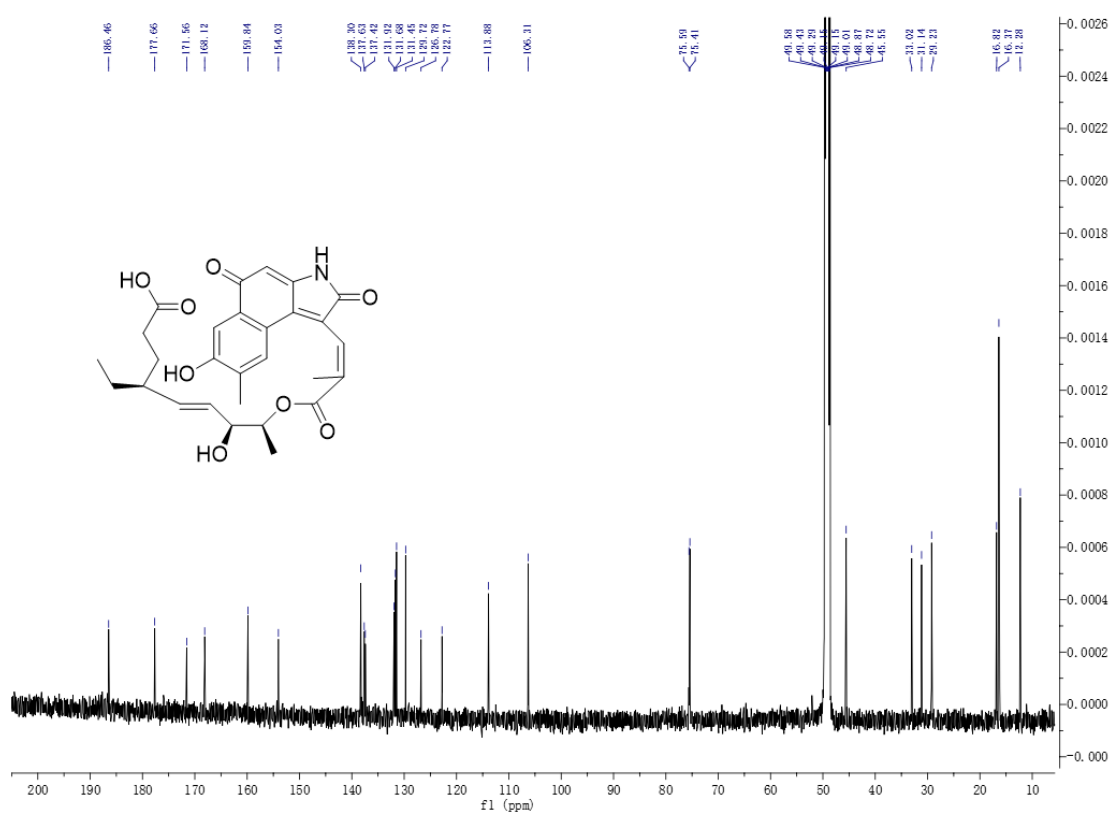



Figure S77.  $^{13}\text{C}$  NMR spectrum of hygrocin O (9)

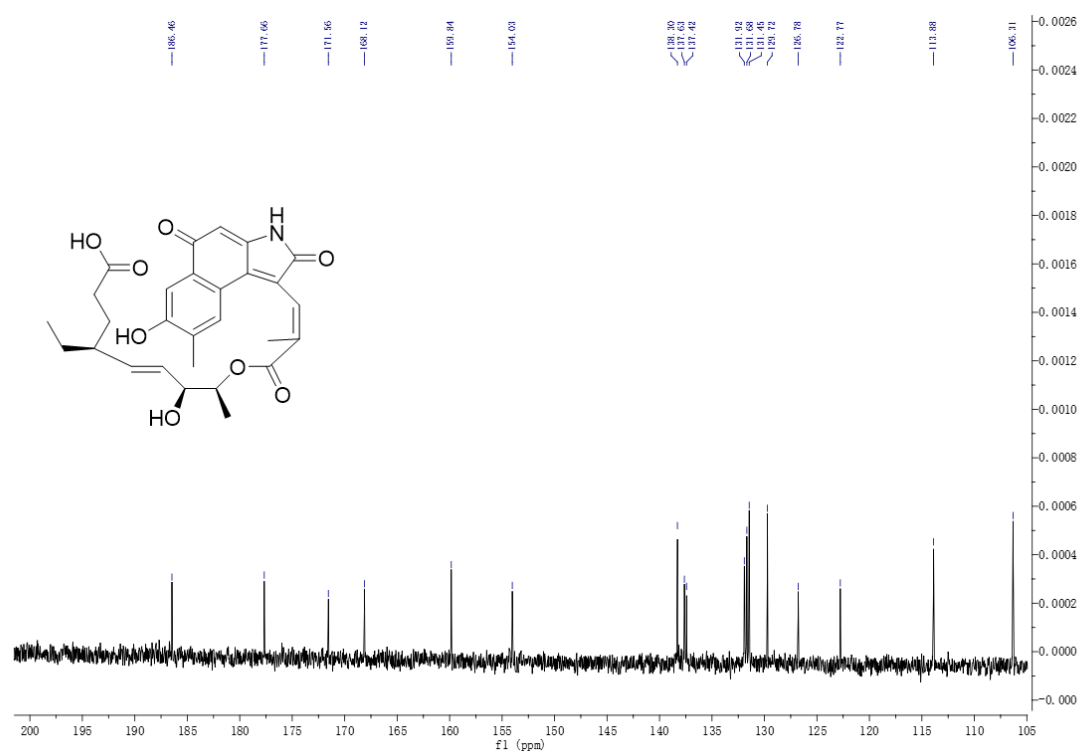

Figure S78.  $^{13}\text{C}$  NMR spectrum of hygrocin O (9)

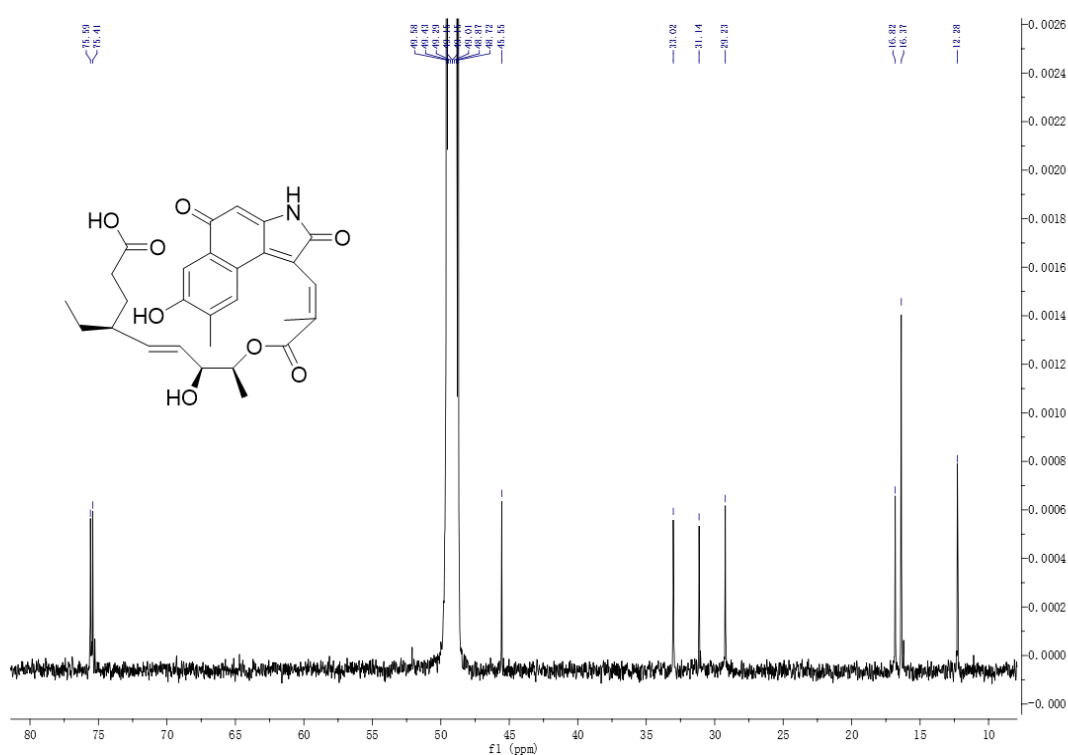

Figure S79. HMQC spectrum of hygrocin O (9)

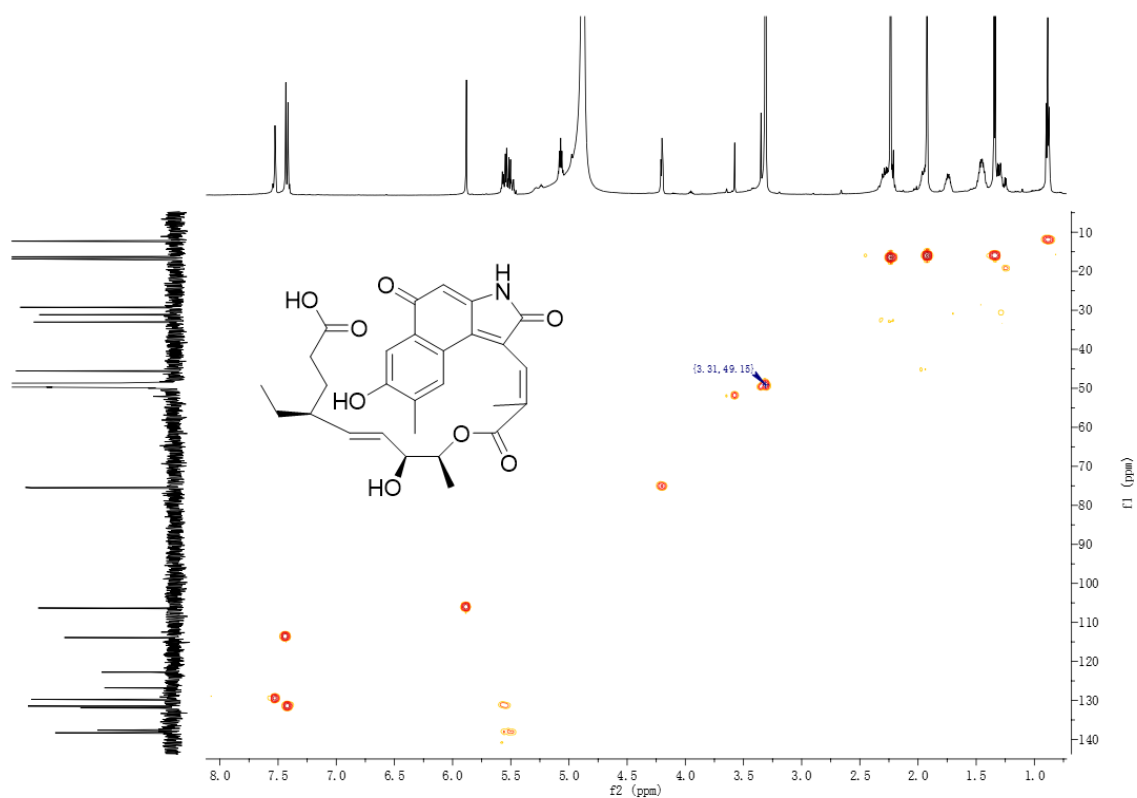

Figure S80. HMQC spectrum of hygrocin O (9)

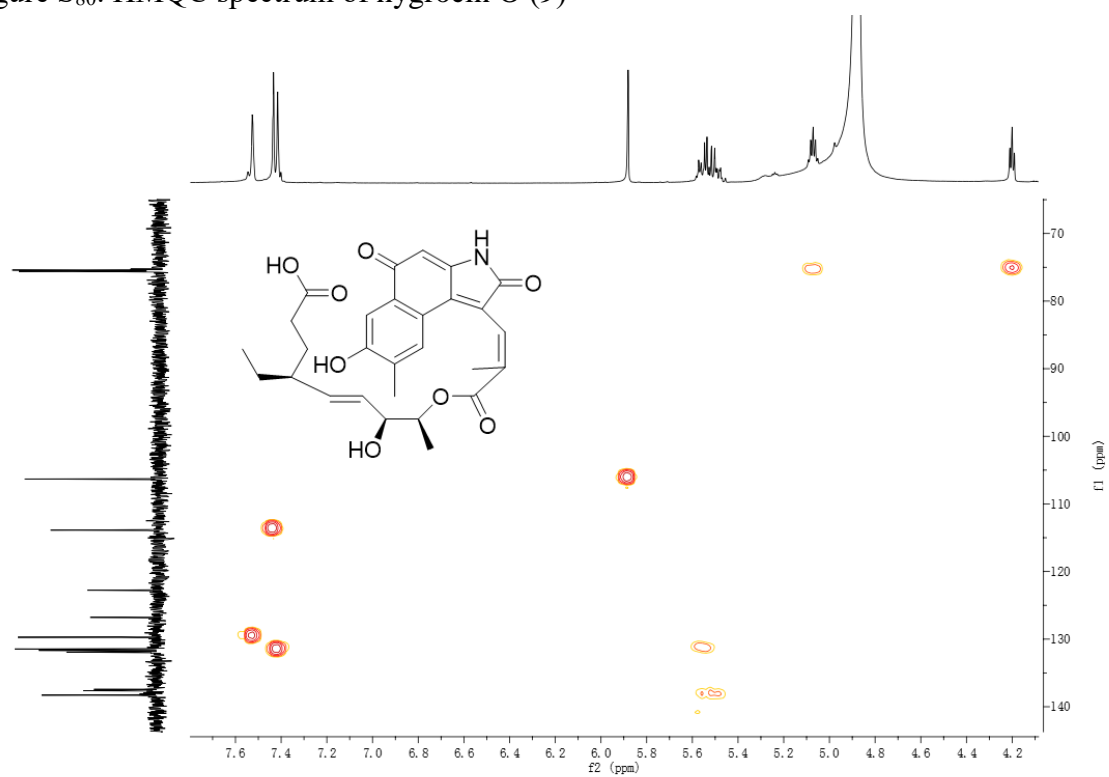

Figure S81. HMQC spectrum of hygrocin O (9)

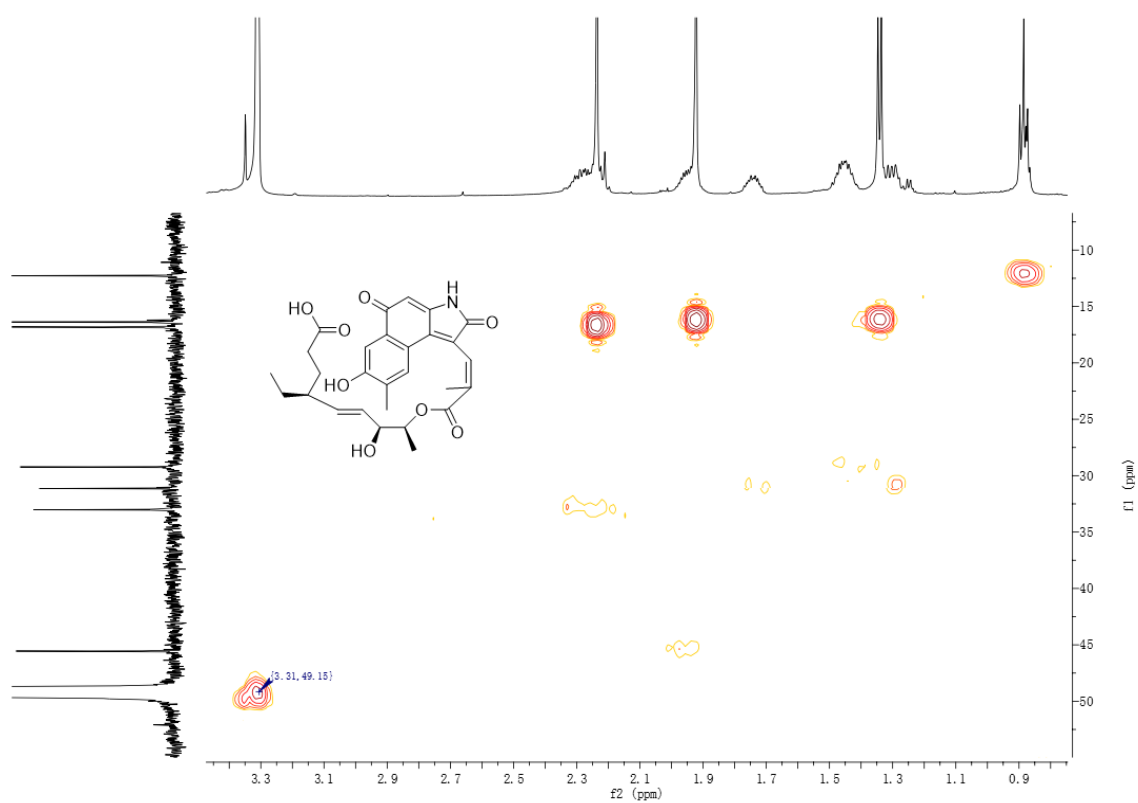

Figure S82. COSY spectrum of hygrocin O (9)

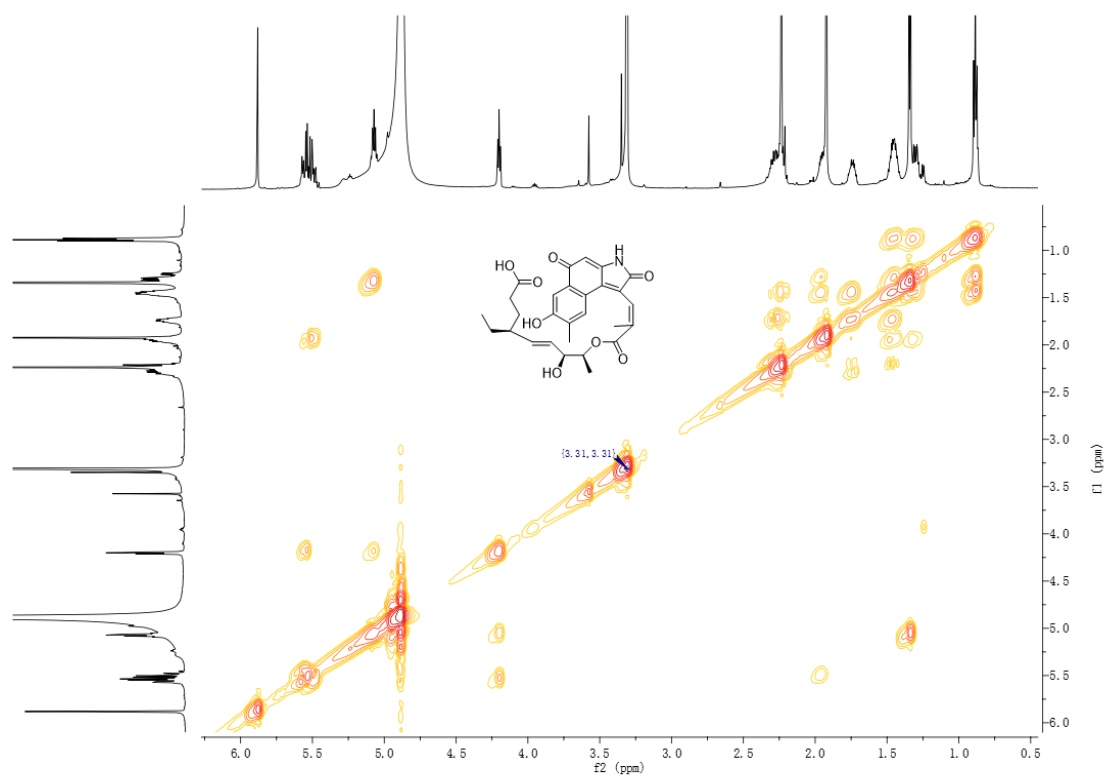

Figure S83. HMBC spectrum of hygrocin O (9)

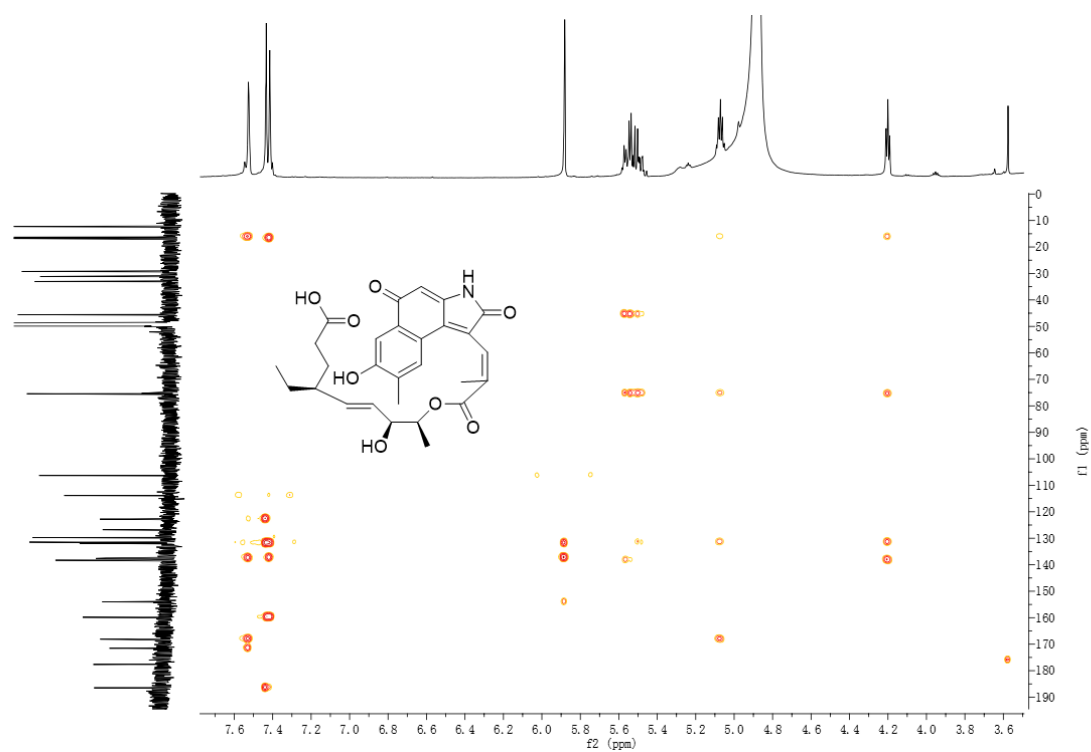

Figure S84. HMBC spectrum of hygrocin O (9)

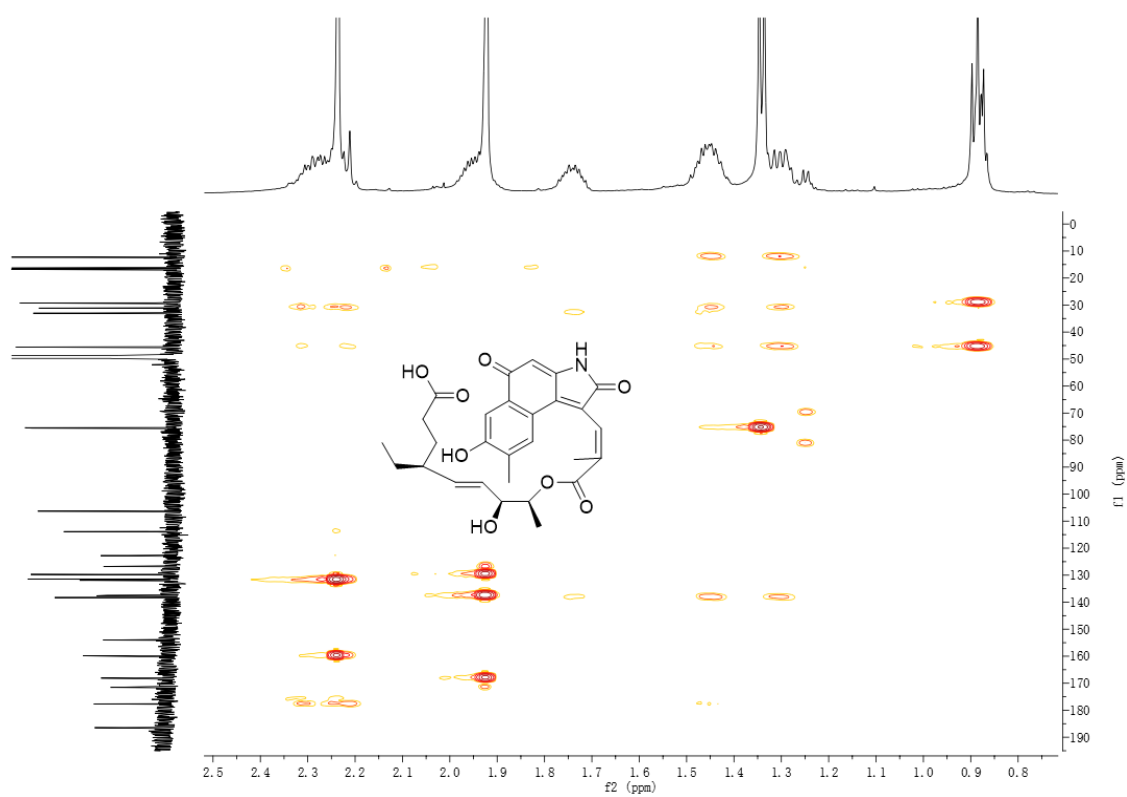

Figure S85. NOESY spectrum of hygrocin O (9)

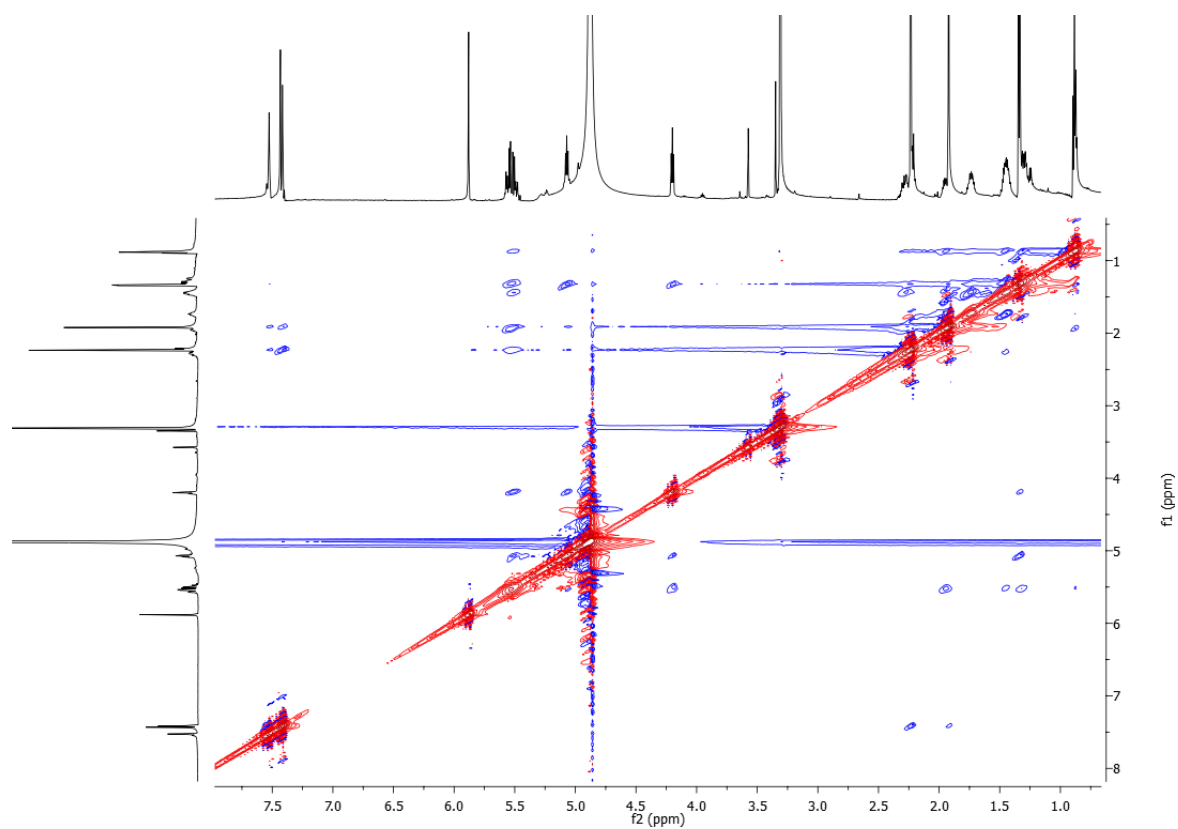

Figure S86. HRESIMS spectrum of hygrocin O (9)

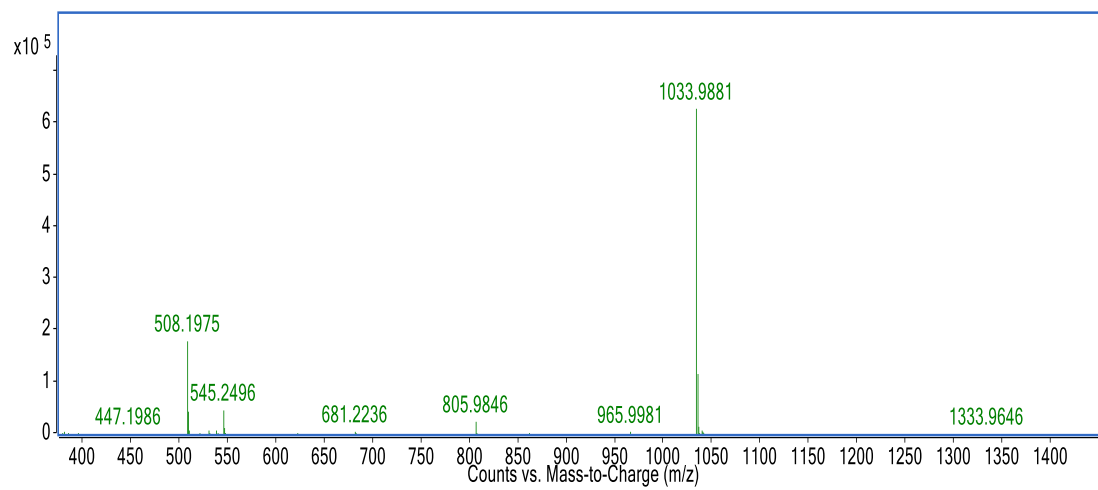

Figure S87. UV spectrum of hygrocin O (9)

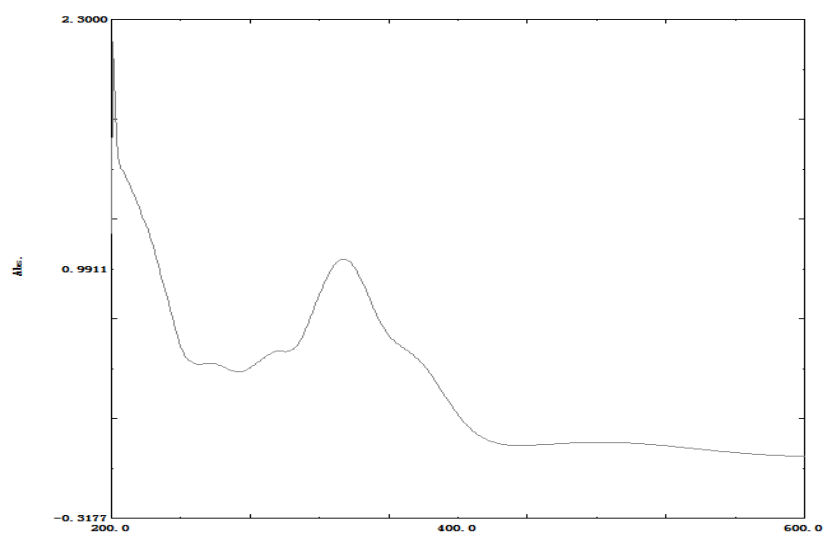

Figure S88. IR spectrum of hygrocin O (9)

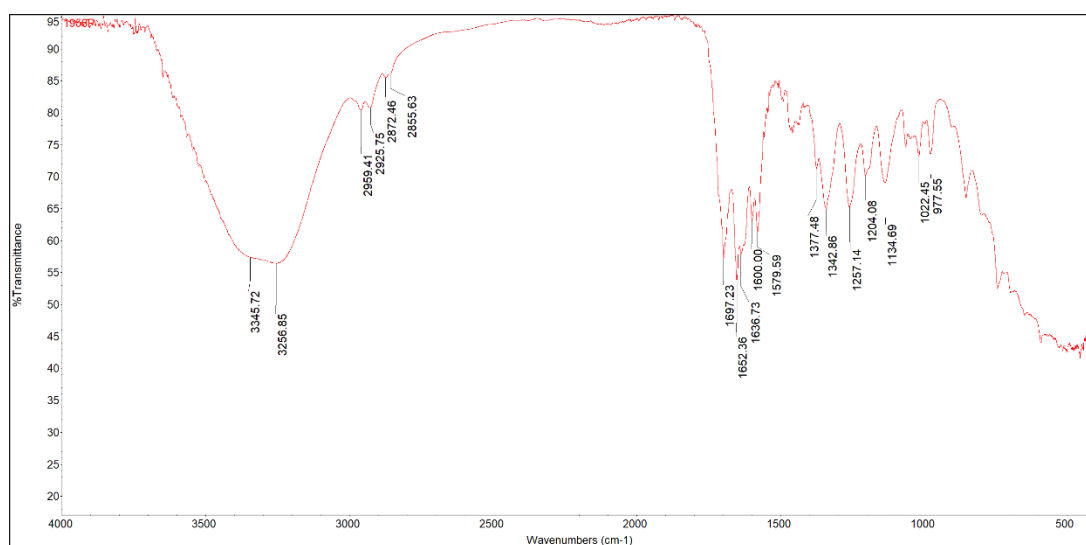

Figure S89.  $^1\text{H}$  NMR spectrum of hygrocin P (**10**)

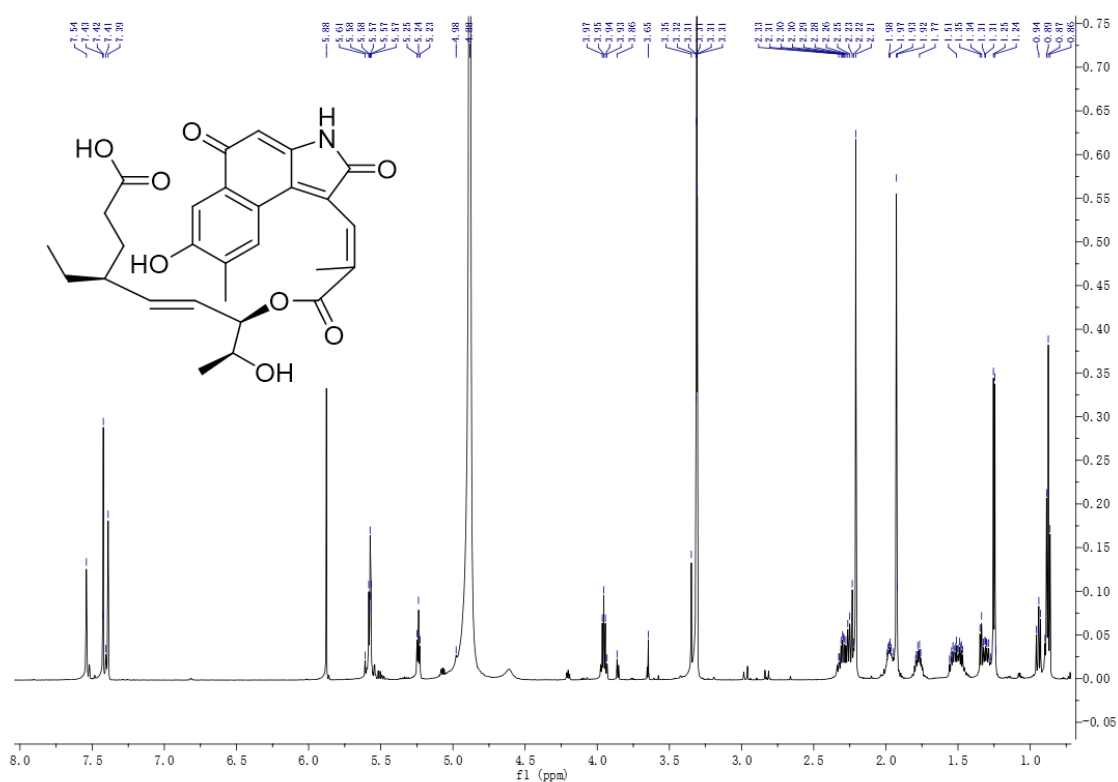

Figure S90.  $^1\text{H}$  NMR spectrum of hygrocin P (**10**)

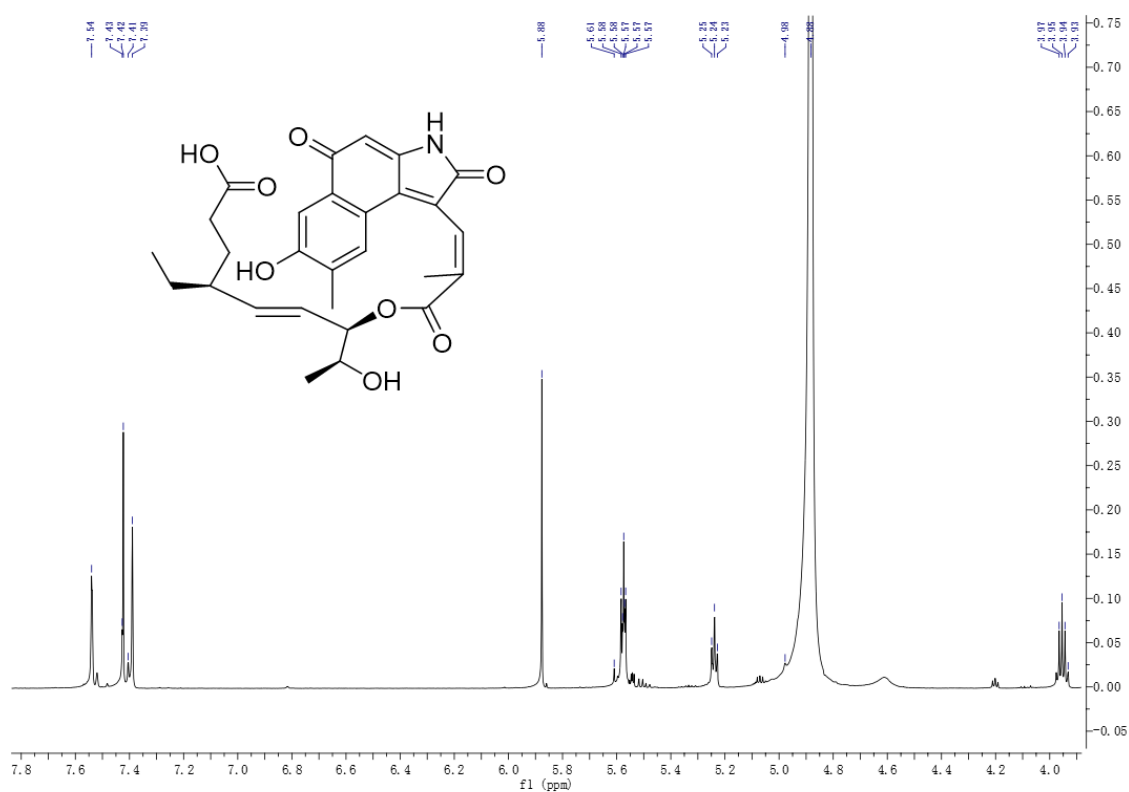

Figure S91.  $^1\text{H}$  NMR spectrum of hygrocin P (**10**)

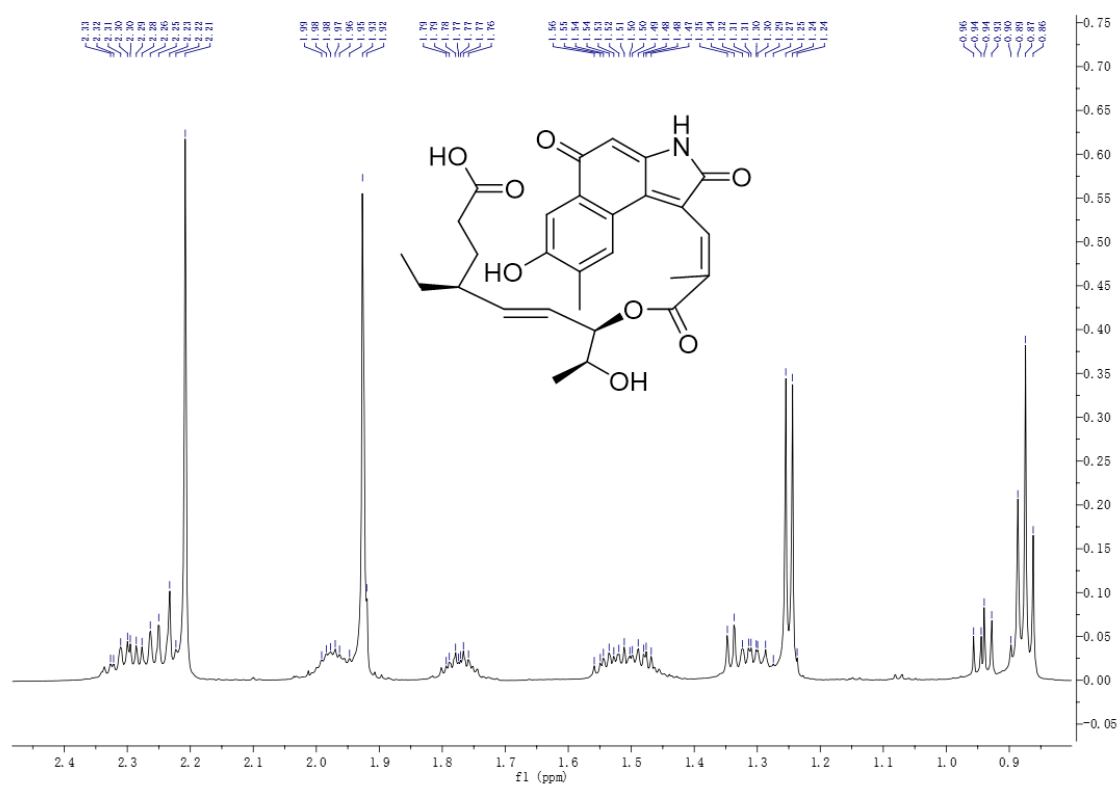

Figure S92.  $^{13}\text{C}$  NMR spectrum of hygrocin P (**10**)

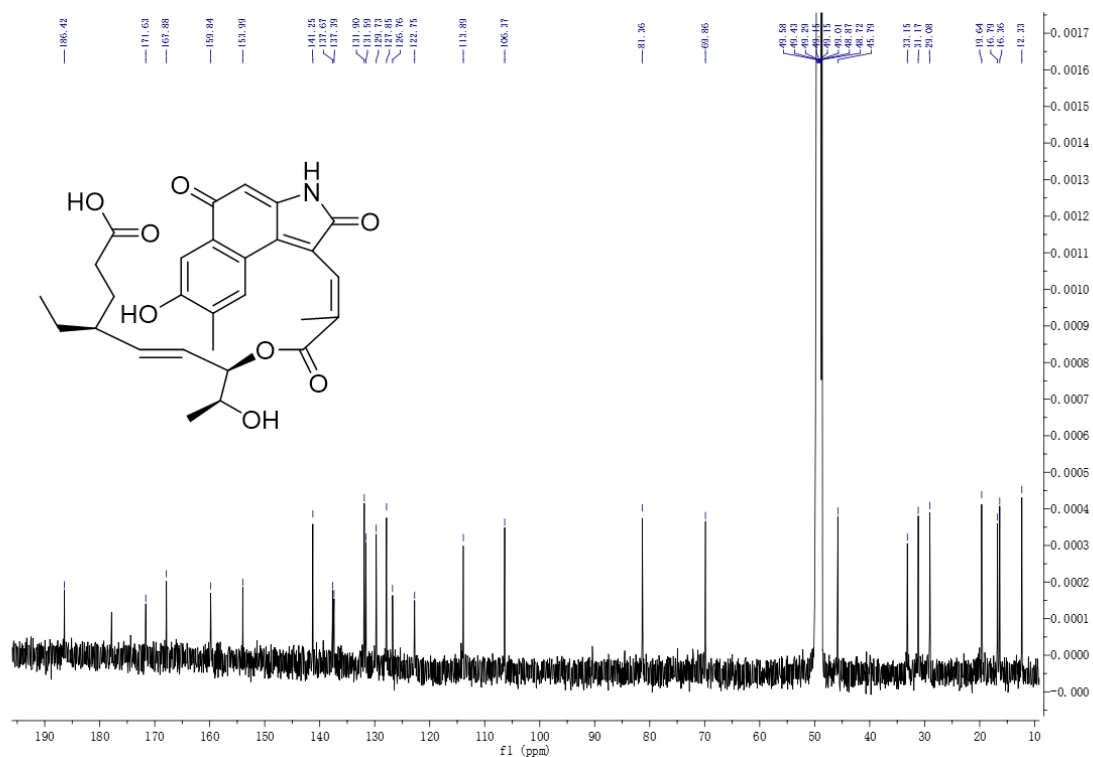



Figure S93.  $^{13}\text{C}$  NMR spectrum of hygrocin P (10)

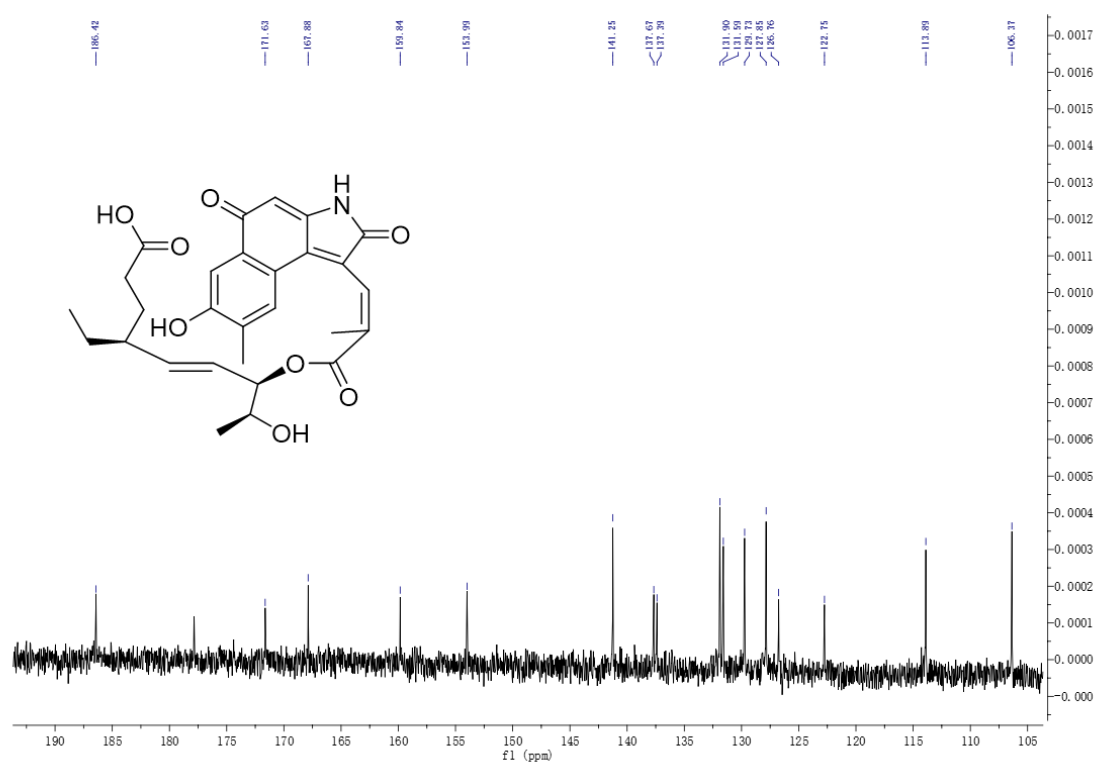

Figure S94.  $^{13}\text{C}$  NMR spectrum of hygrocin P (10)

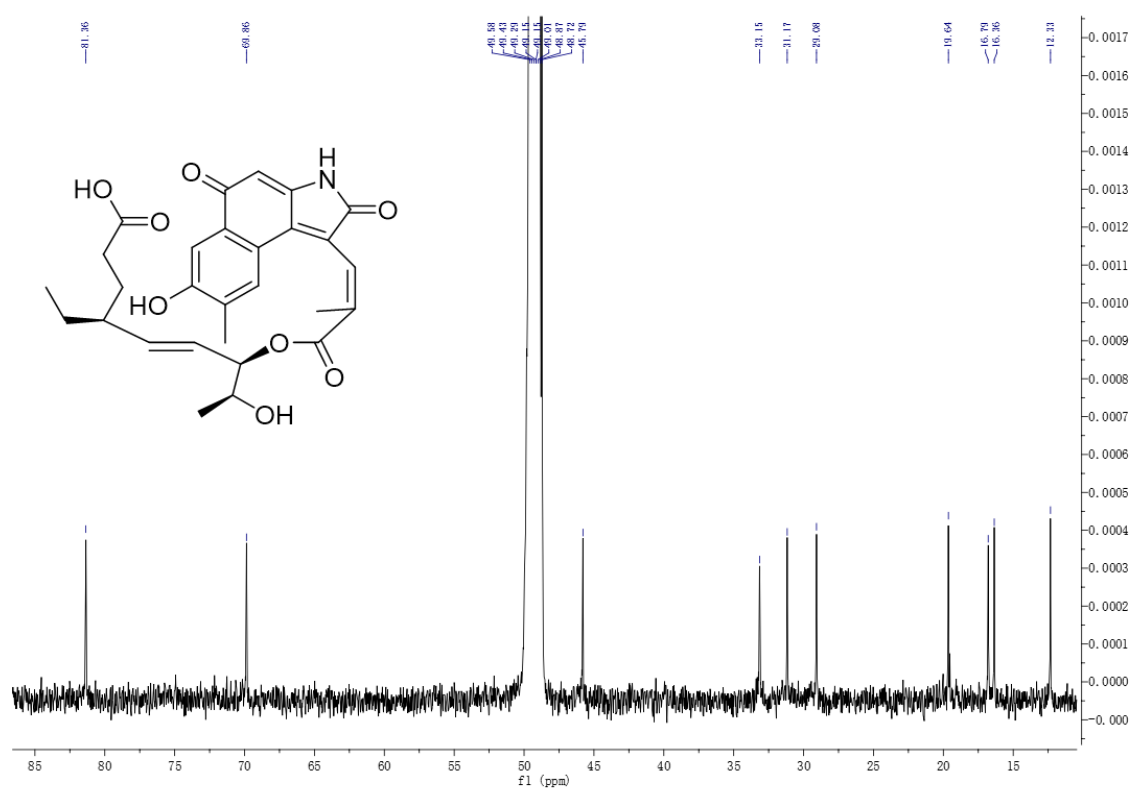

Figure S95. HMQC spectrum of hygrocin P (**10**)

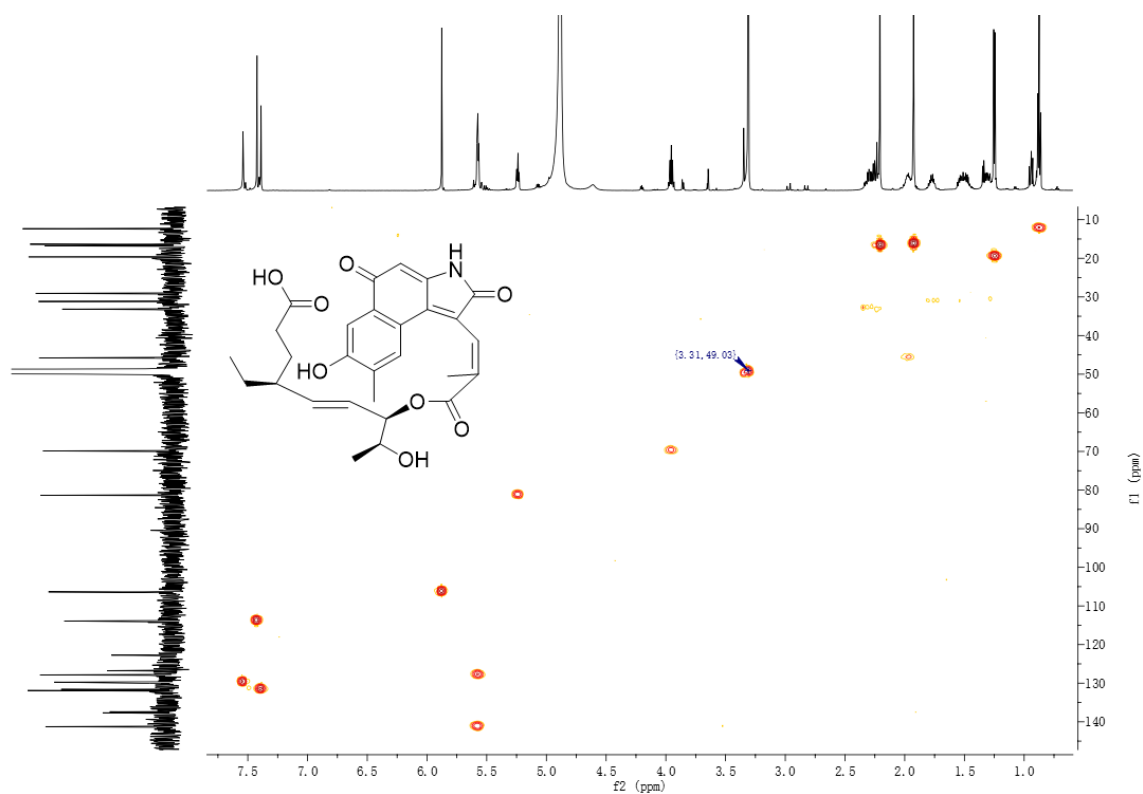

Figure S96. HMQC spectrum of hygrocin P (**10**)

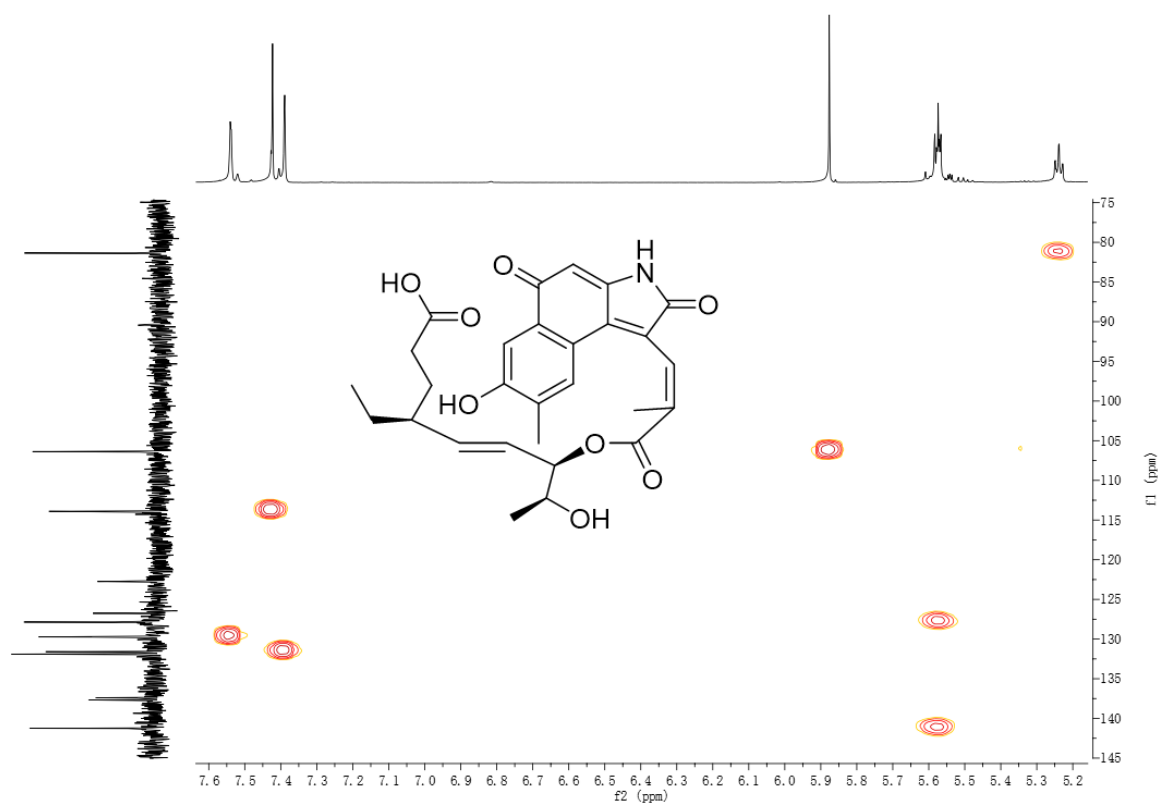

Figure S97. HMQC spectrum of hygrocin P (**10**)

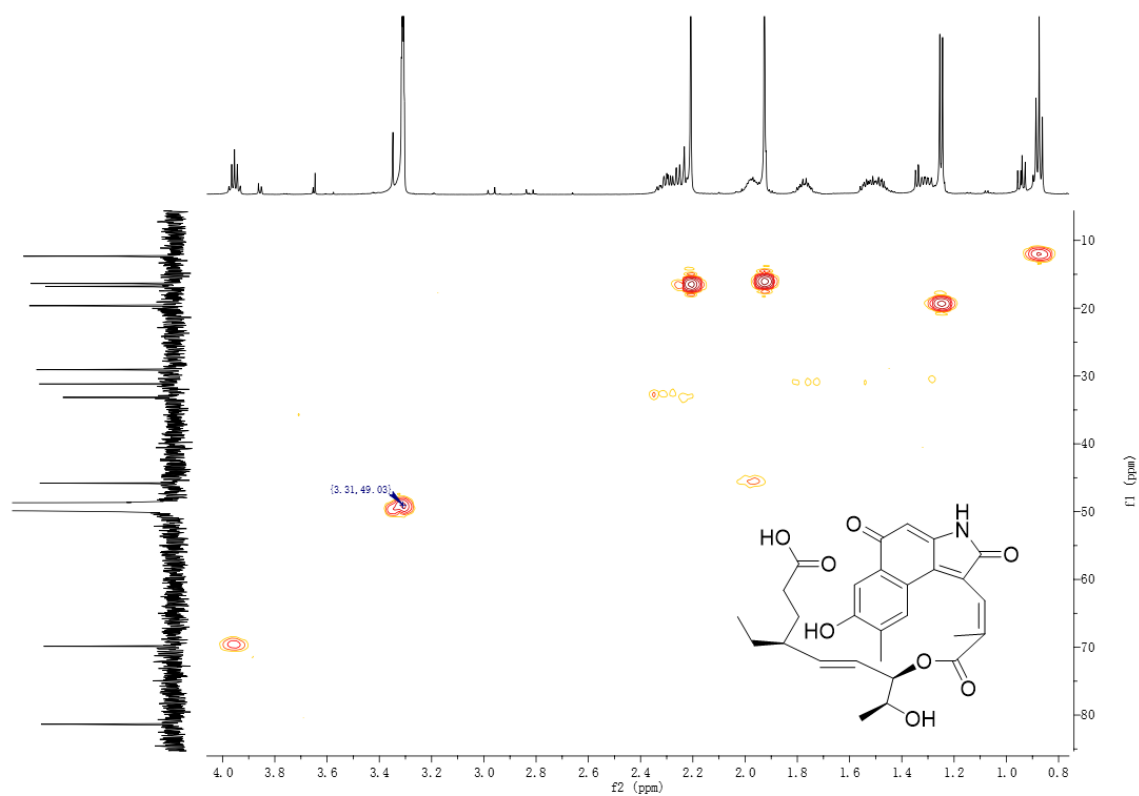

Figure S98. COSY spectrum of hygrocin P (**10**)

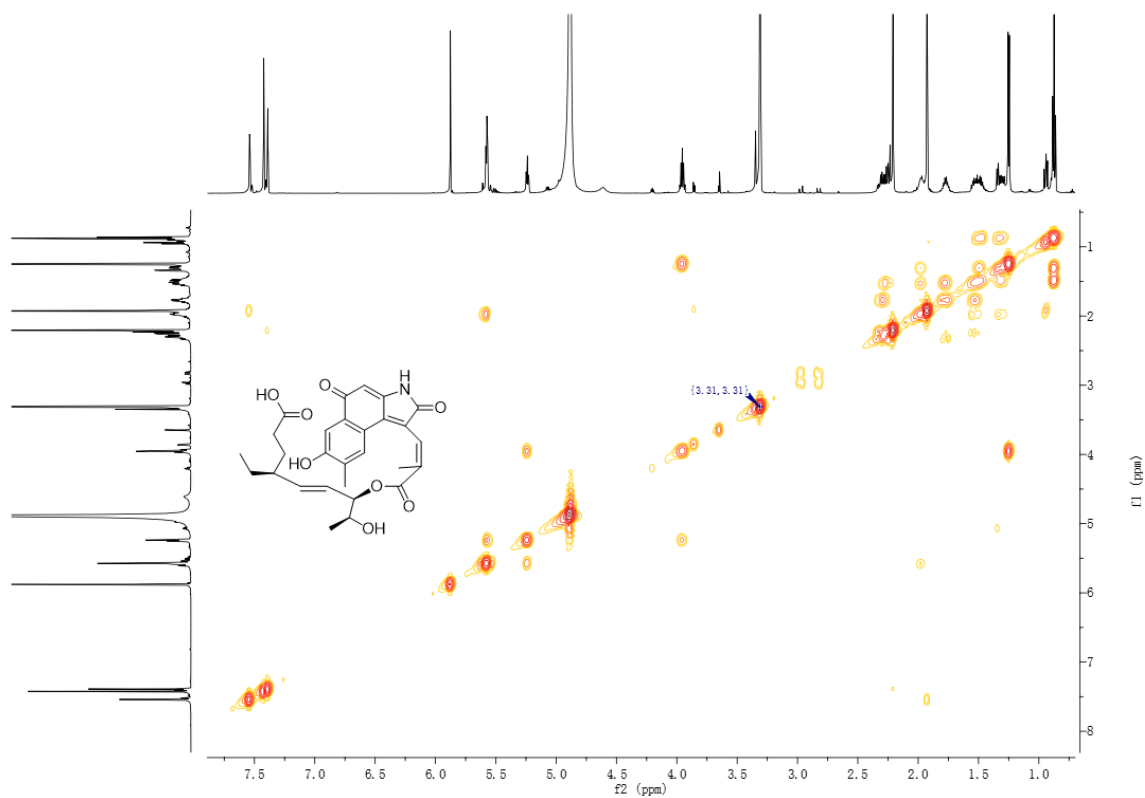

Figure S99. HMBC spectrum of hygrocin P (10)

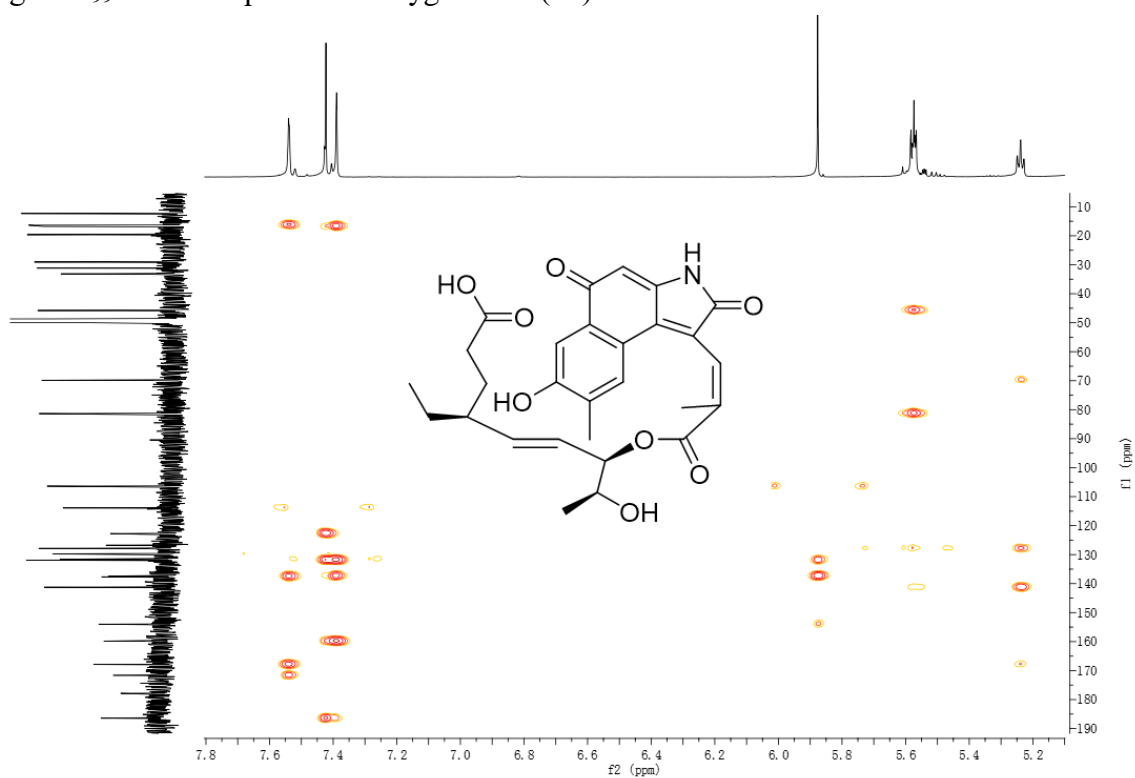

Figure S100. HMBC spectrum of hygrocin P (10)

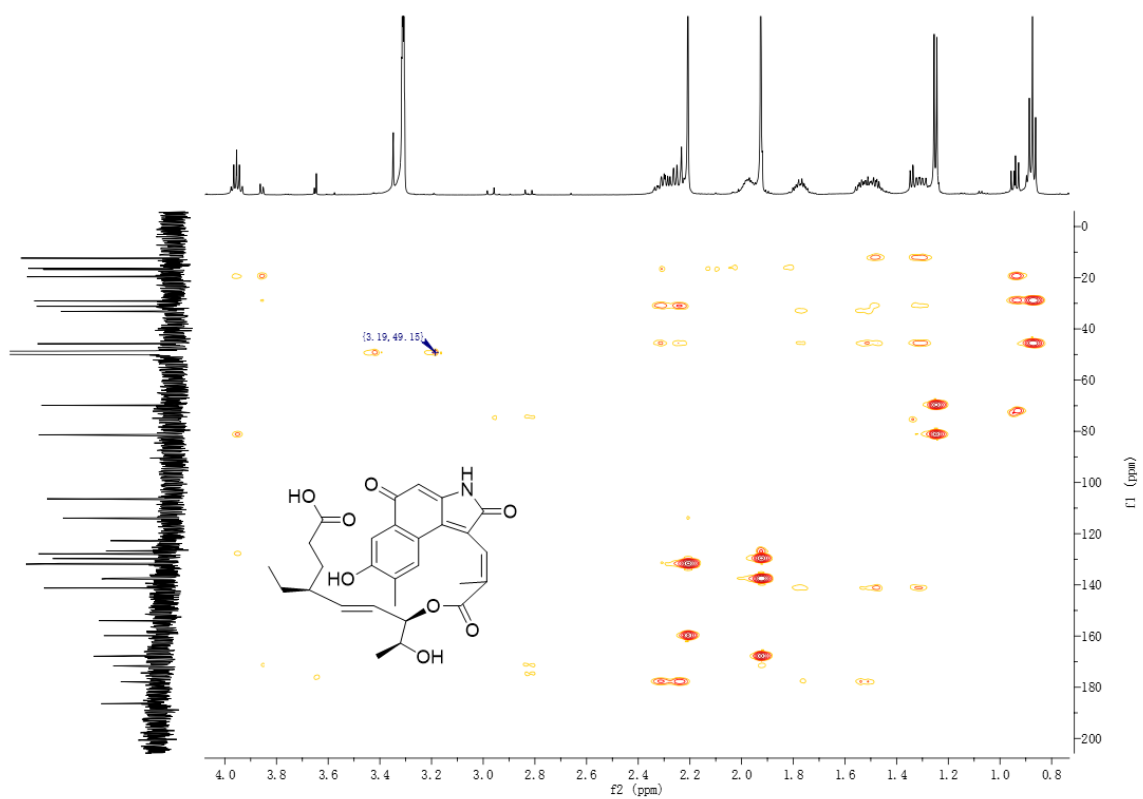

Figure S<sub>101</sub>. NOESY spectrum of hygrocin P (**10**)

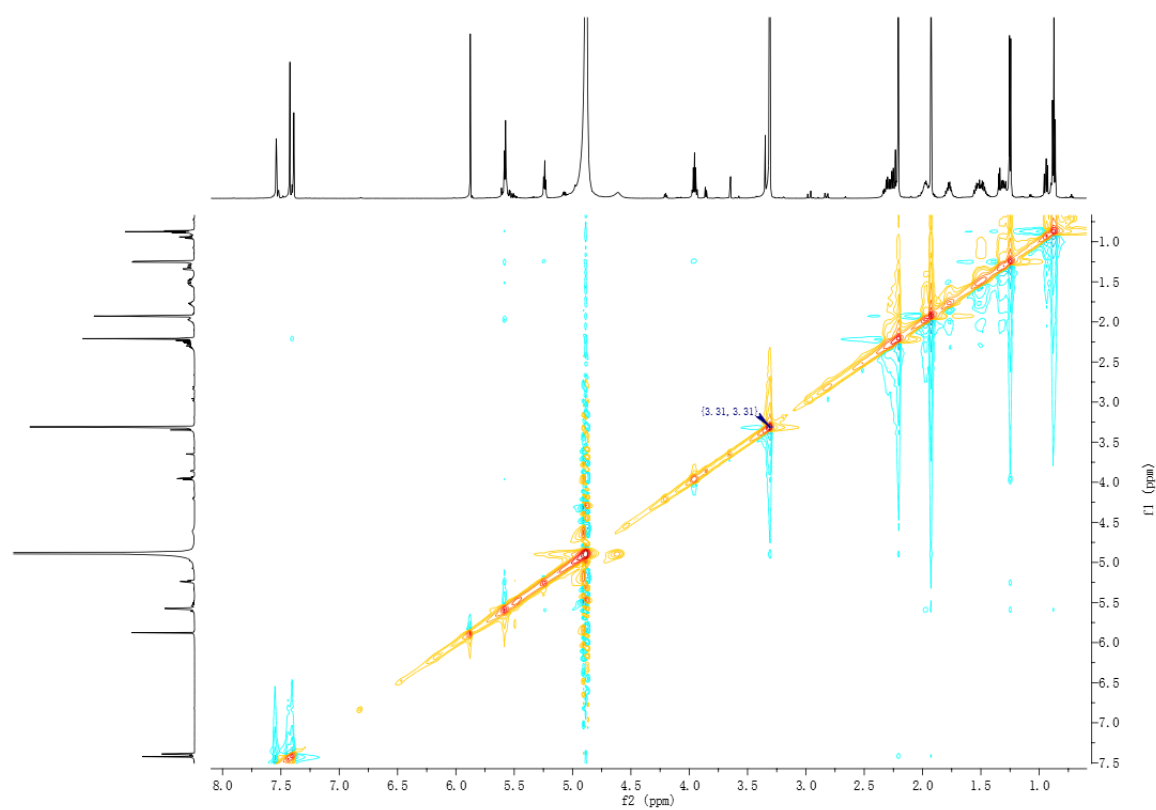

Figure S<sub>102</sub>. HRESIMS spectrum of hygrocin P (**10**)

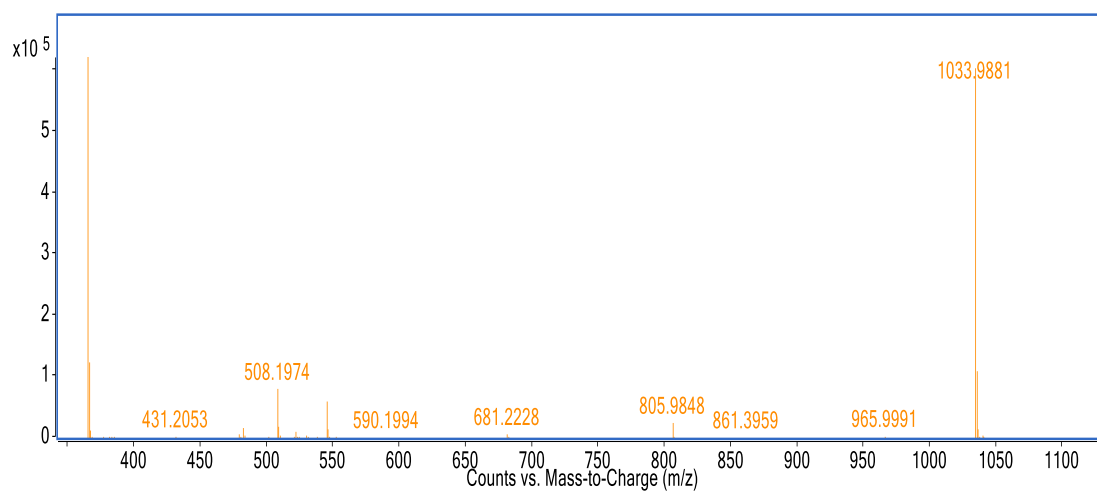

Figure S<sub>103</sub>. UV spectrum of hygrocin P (**10**)

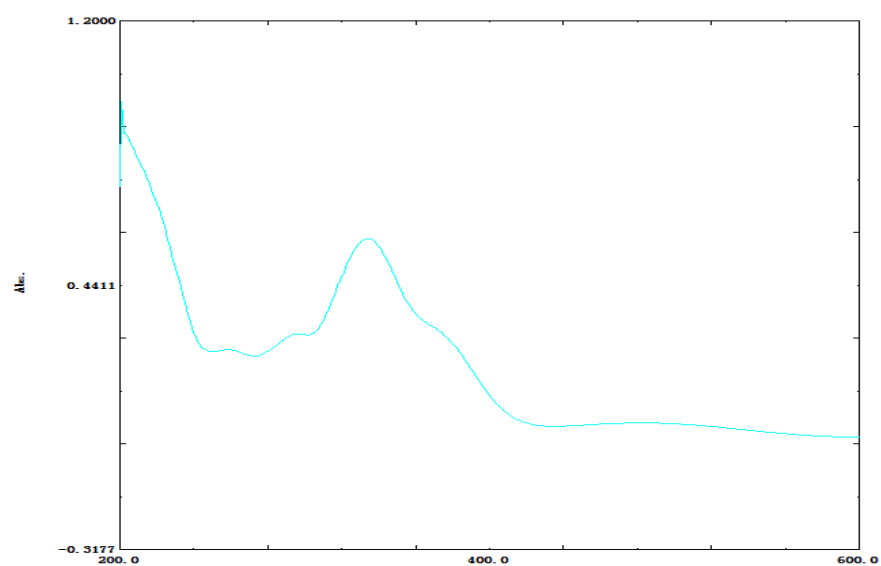

Figure S<sub>104</sub>. IR spectrum of hygrocin P (**10**)

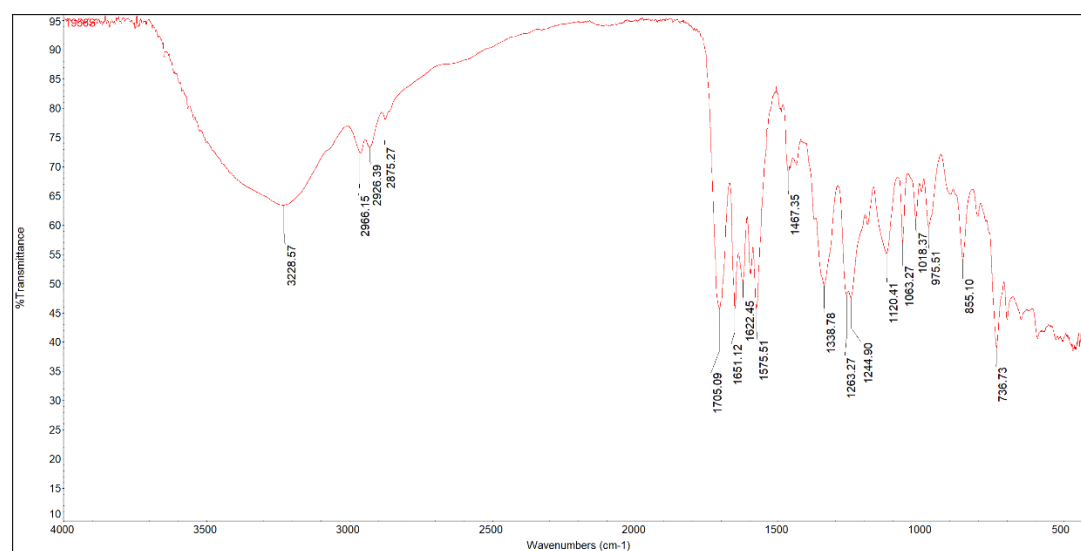

Figure S105.  $^1\text{H}$  NMR spectrum of hygrocin Q (**11**)

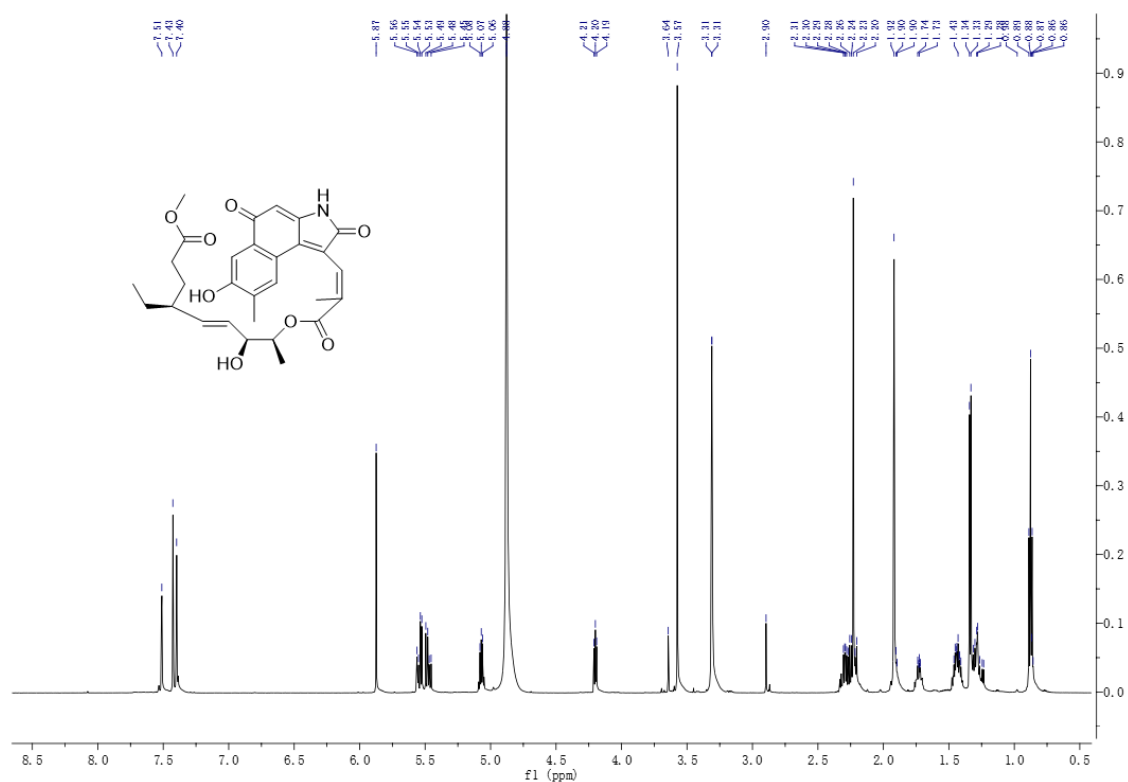

Figure S106.  $^1\text{H}$  NMR spectrum of hygrocin Q (**11**)

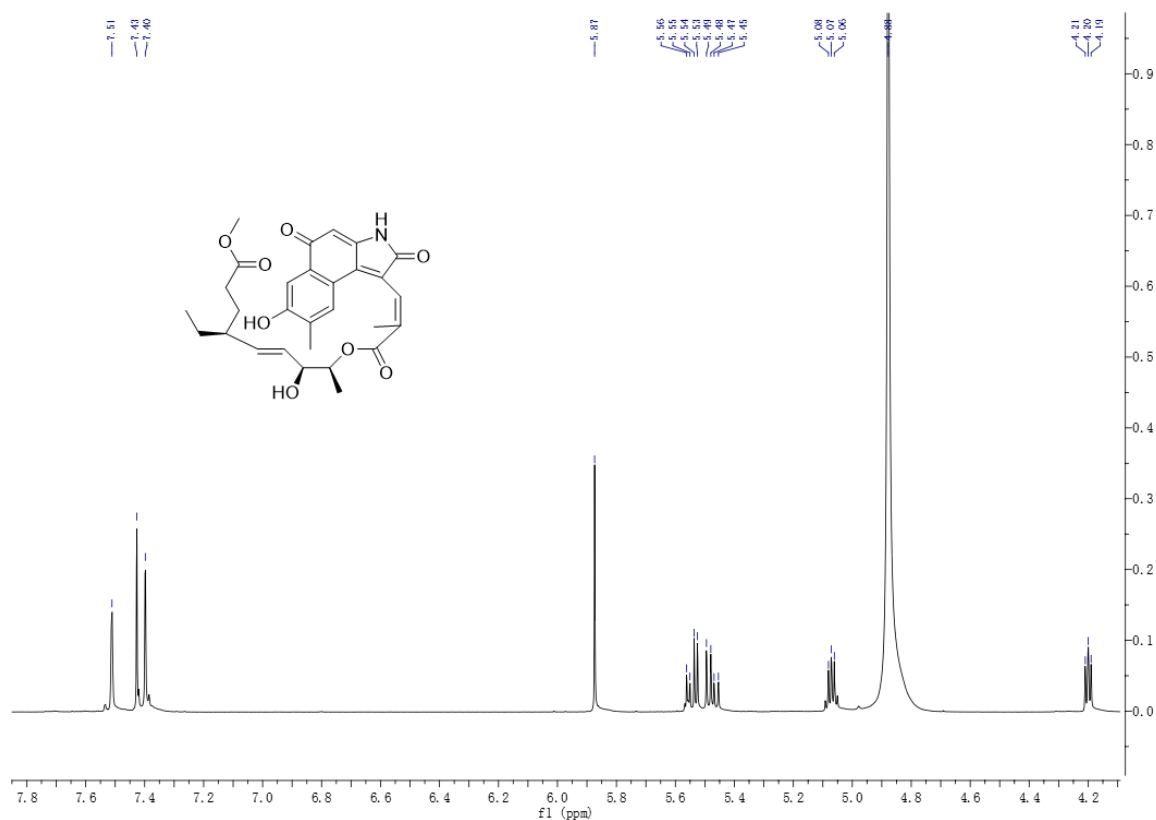

Figure S107.  $^1\text{H}$  NMR spectrum of hygrocin Q (11)

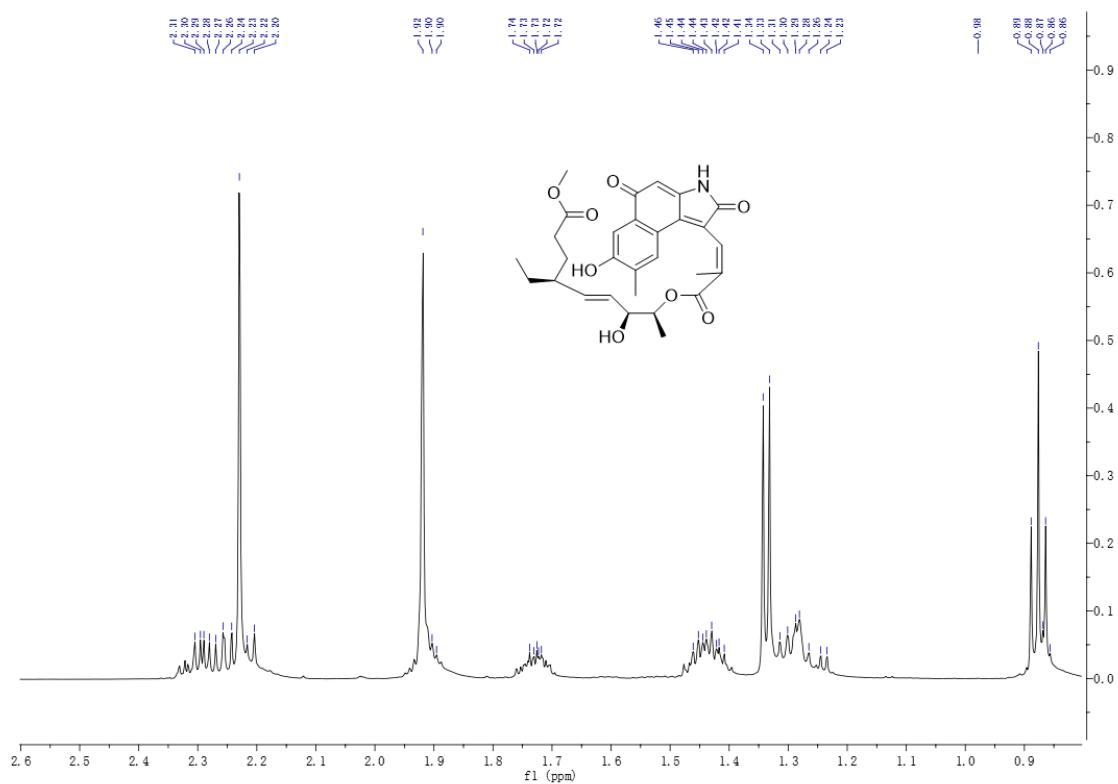

Figure S108.  $^{13}\text{C}$  NMR spectrum of hygrocin Q (11)

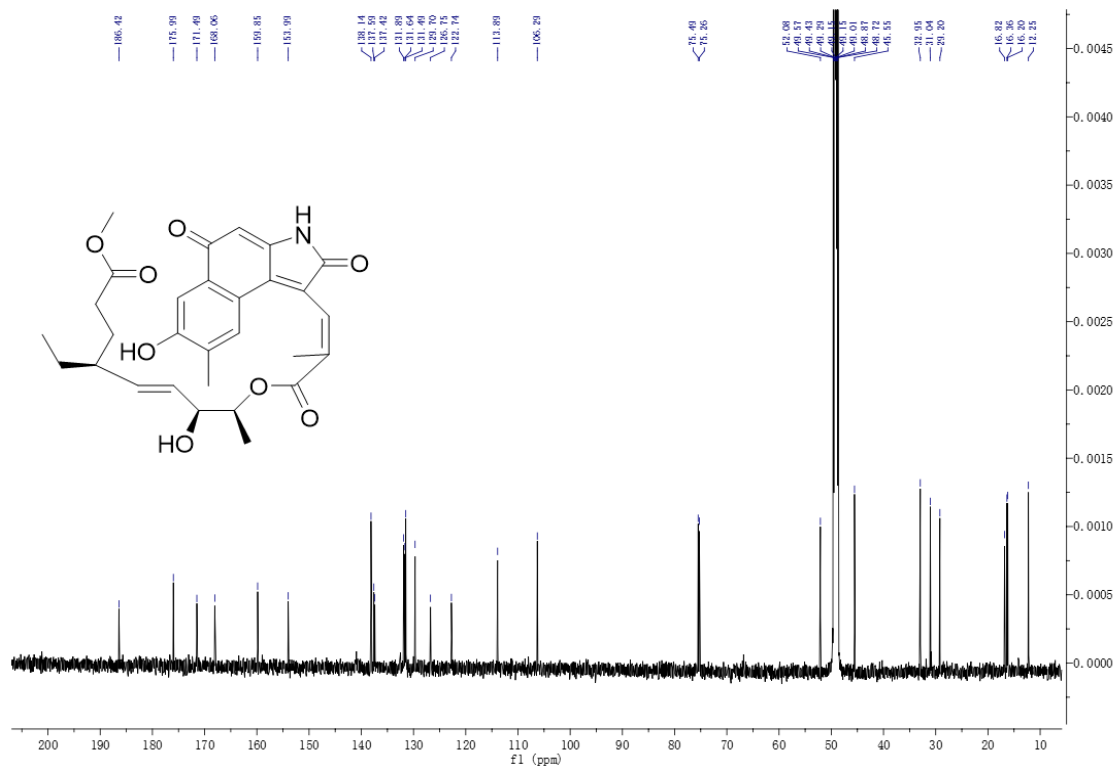



Figure S<sub>109</sub>. <sup>13</sup>C NMR spectrum of hygrocin Q (11)

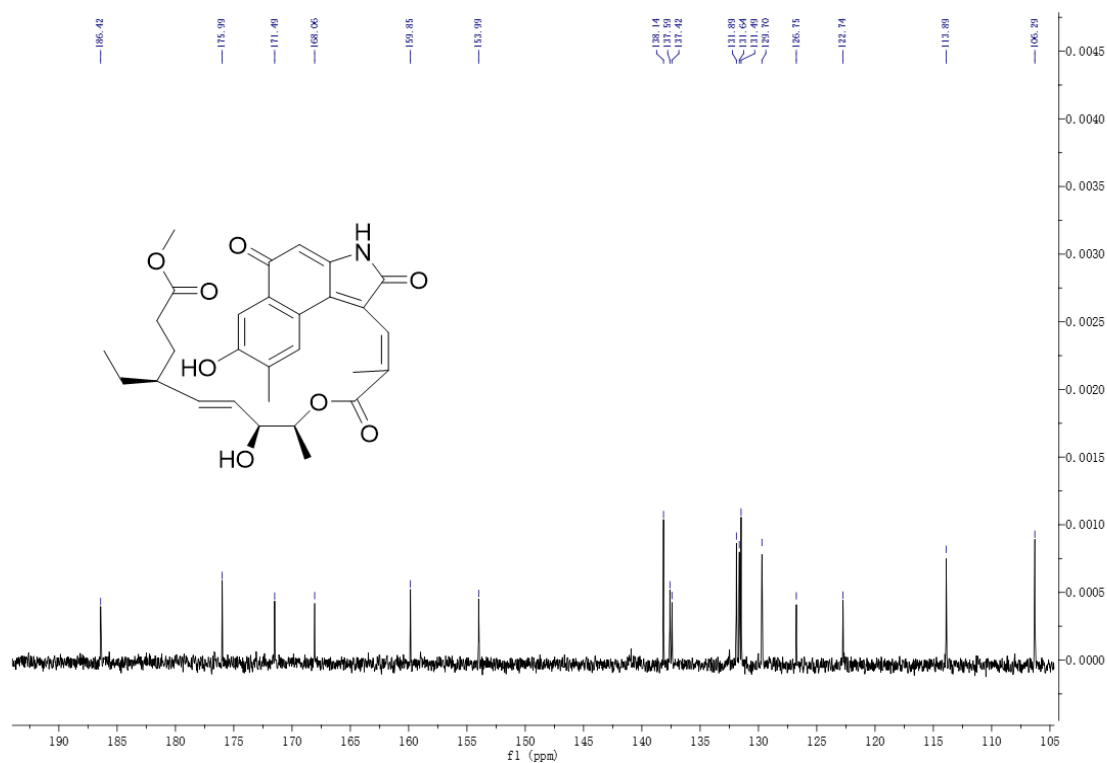

Figure S<sub>110</sub>. <sup>13</sup>C NMR spectrum of hygrocin Q (11)

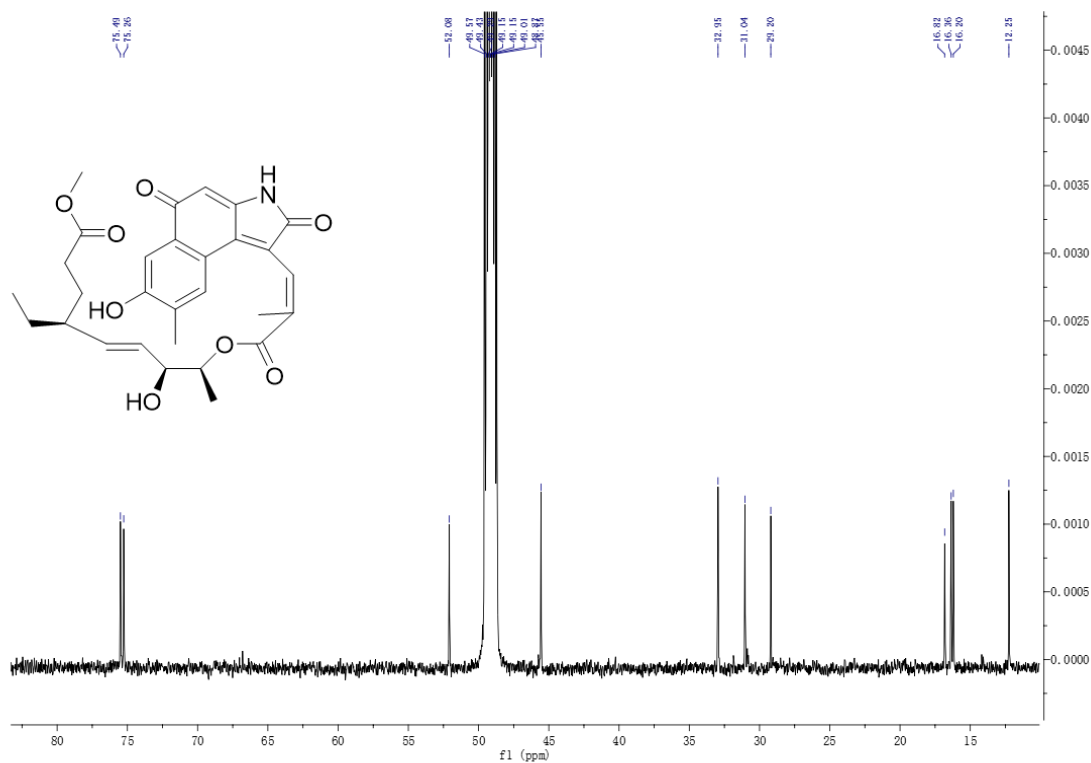

Figure S111. HMQC spectrum of hygrocin Q (**11**)

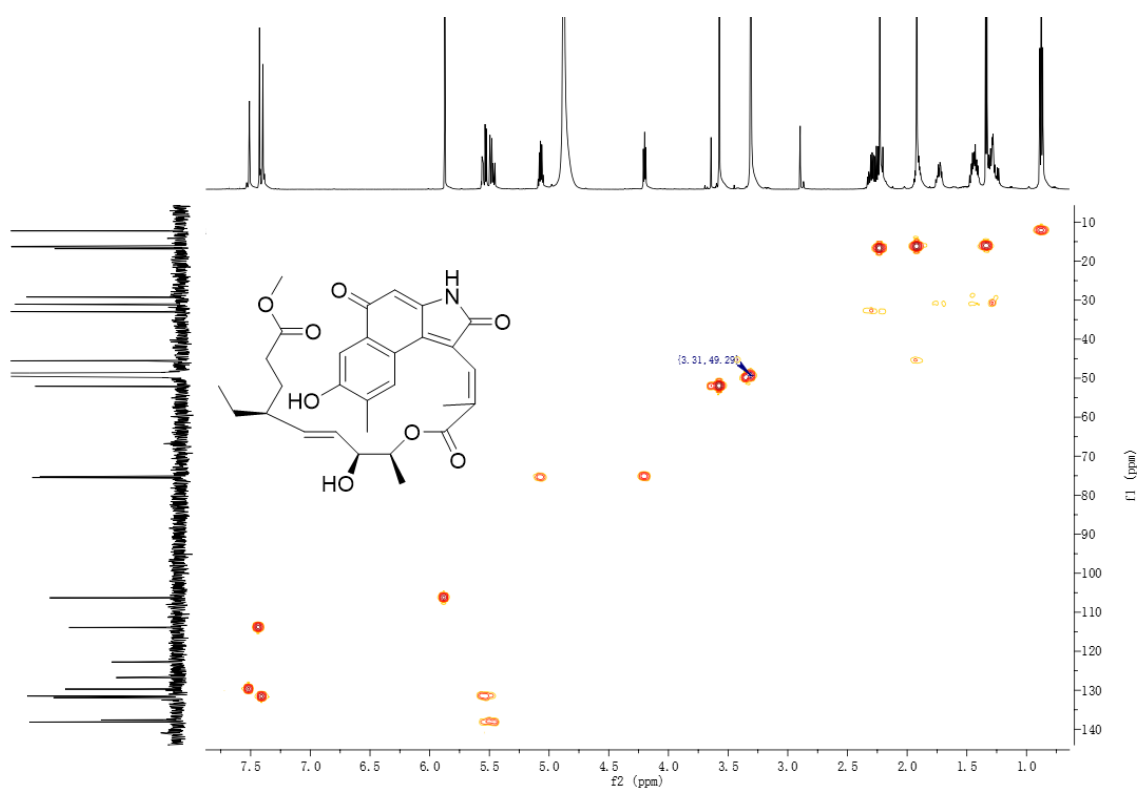

Figure S112. COSY spectrum of hygrocin Q (**11**)

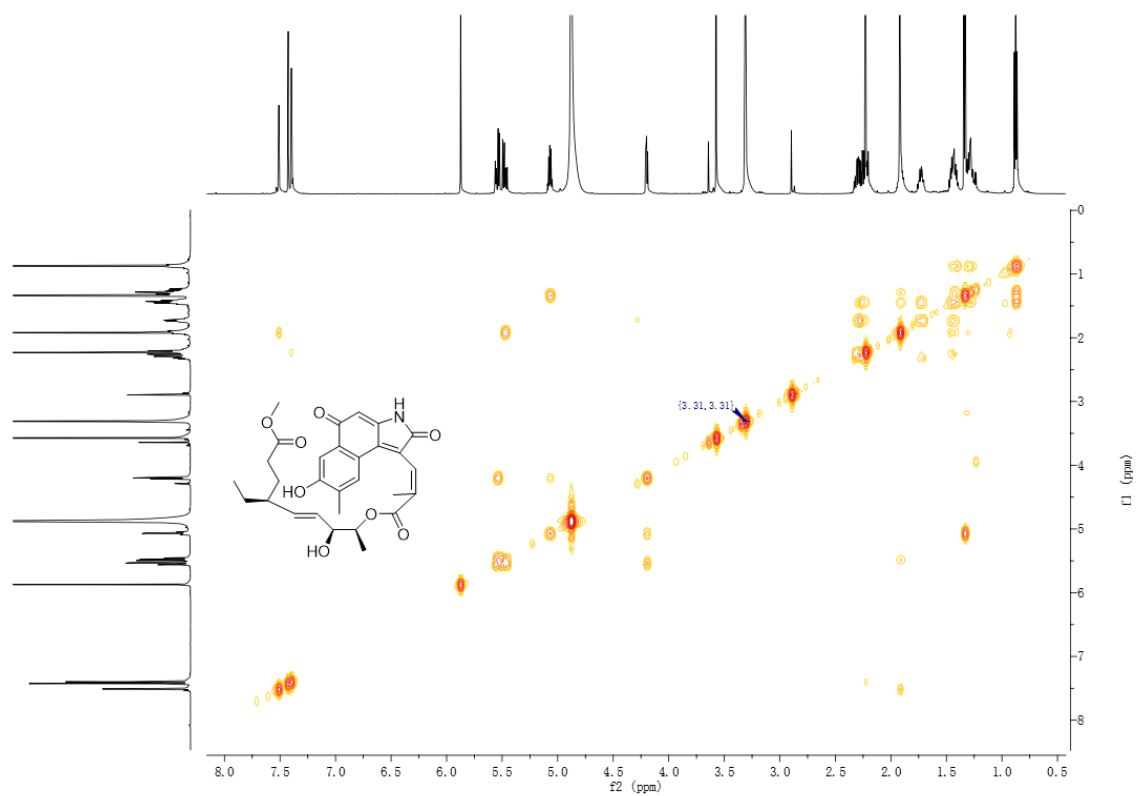

Figure S<sub>113</sub>. HMBC spectrum of hygrocin Q (11)

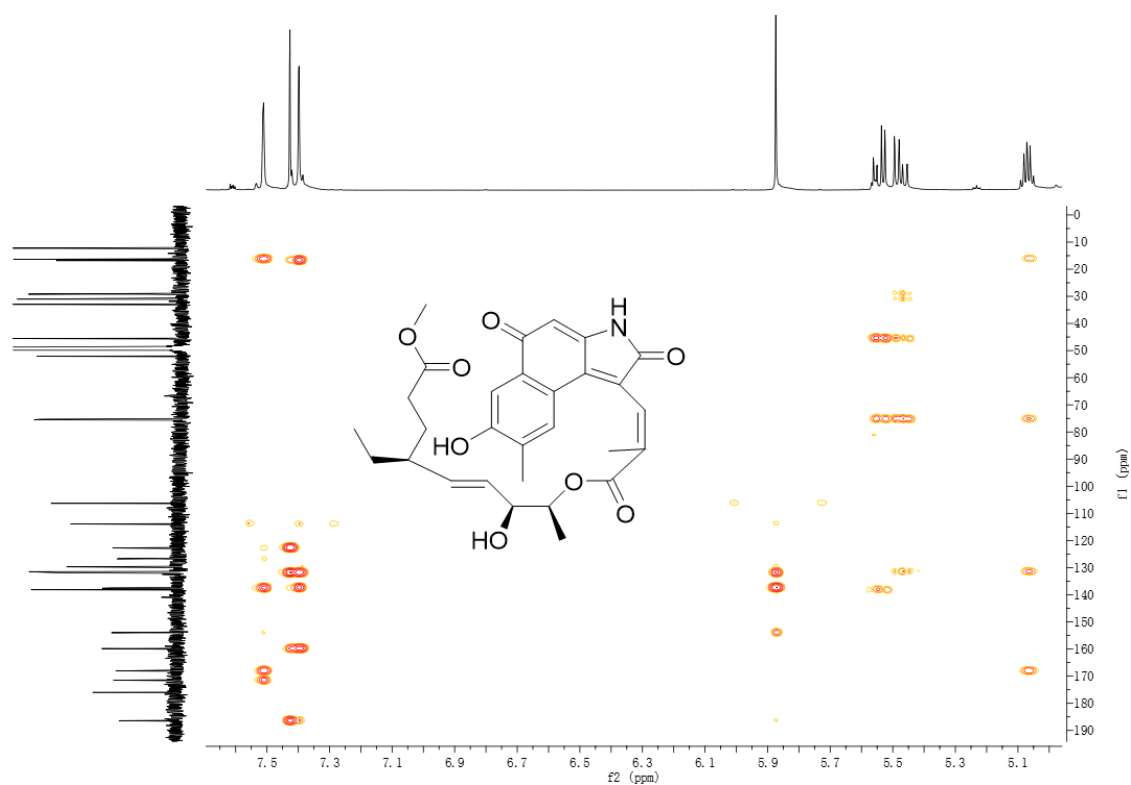

Figure S<sub>114</sub>. HMBC spectrum of hygrocin Q (11)

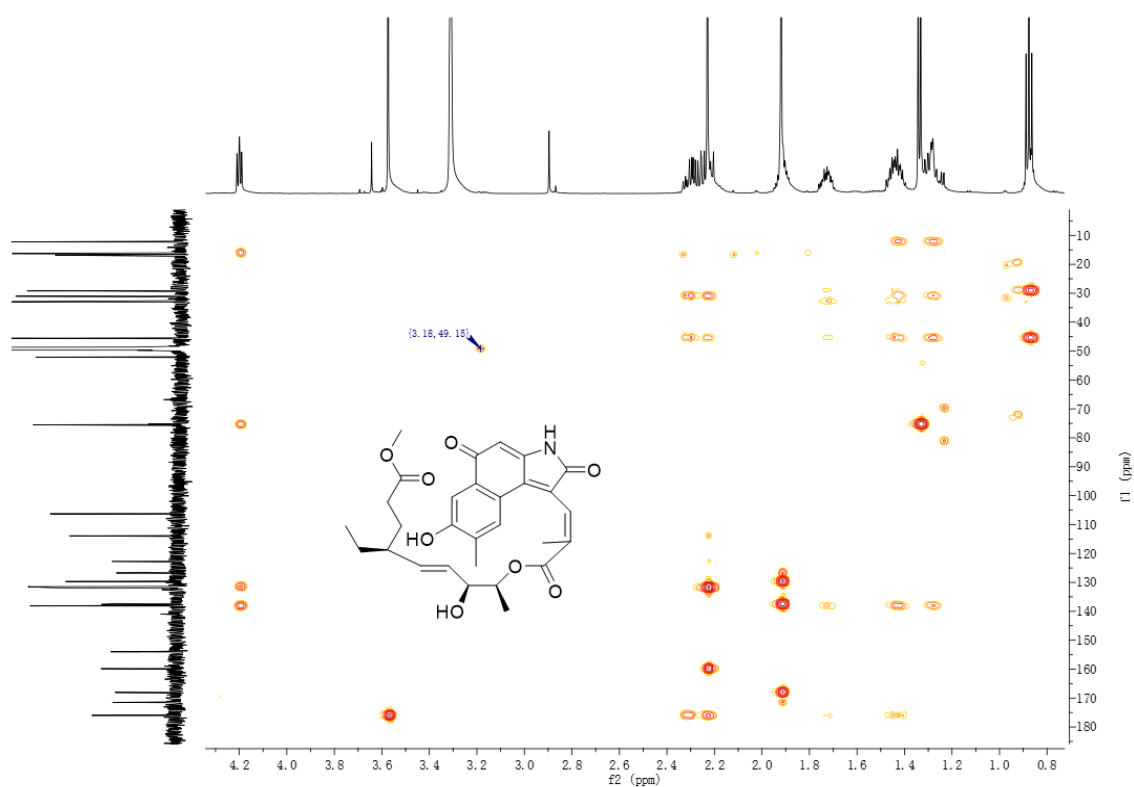

Figure S<sub>115</sub>. NOESY spectrum of hygrocin Q (**11**)

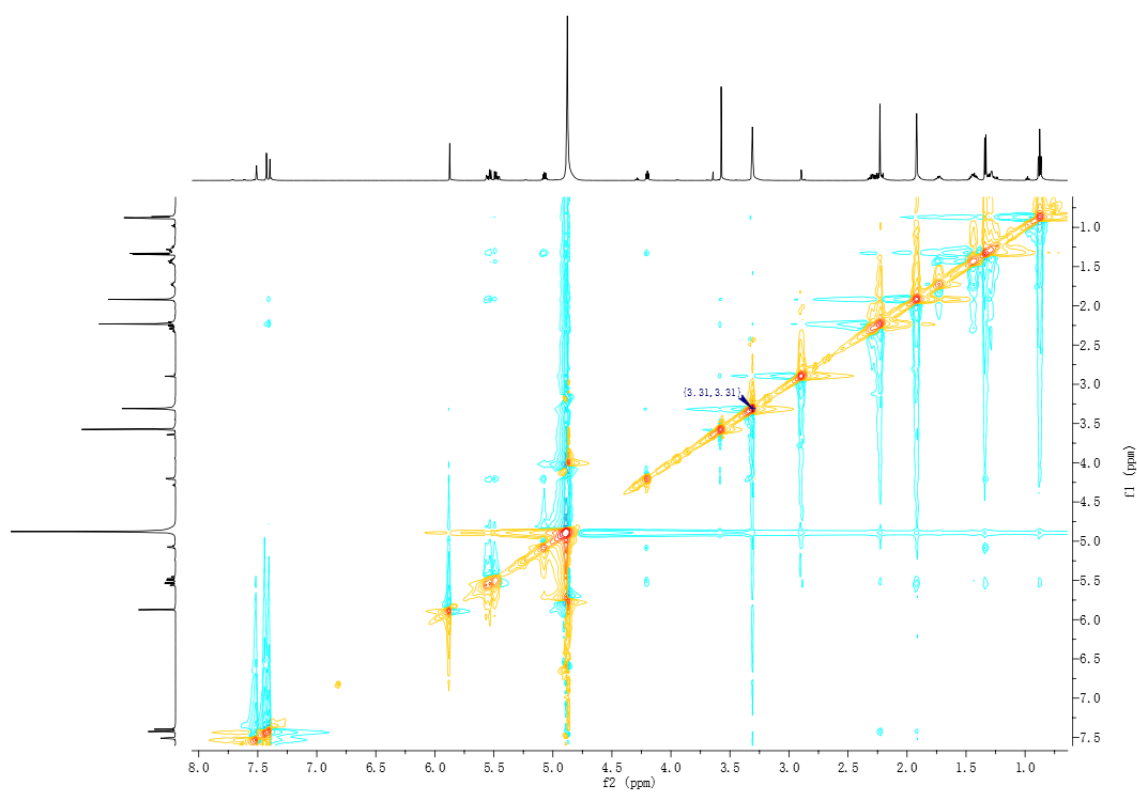

Figure S<sub>116</sub>. HRESIMS spectrum of hygrocin Q (**11**)

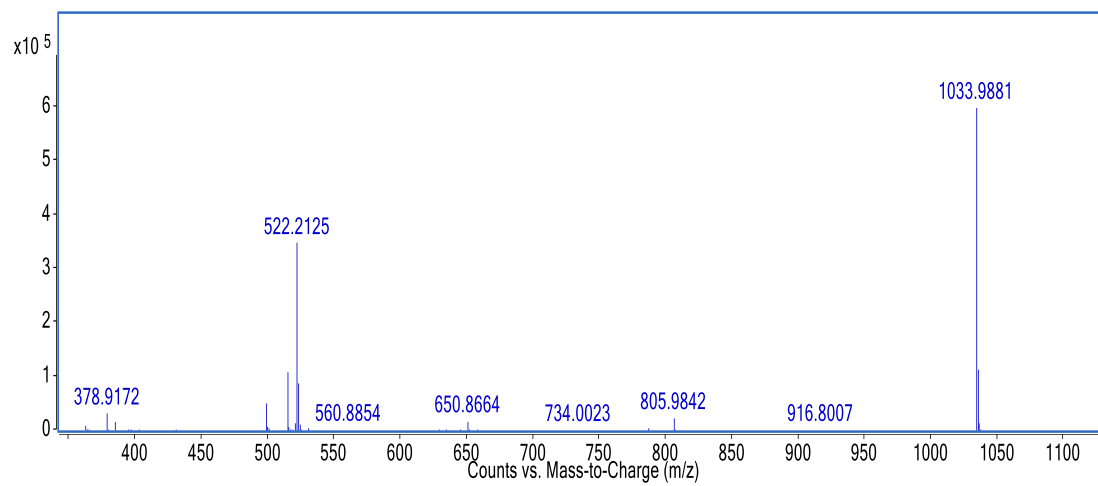

Figure S<sub>117</sub>. UV spectrum of hygrocin Q (**11**)

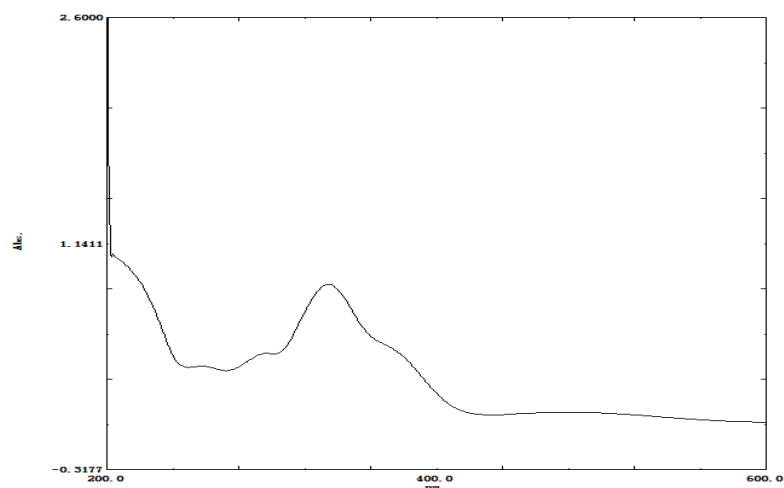

Figure S<sub>118</sub>. IR spectrum of hygrocin Q (**11**)

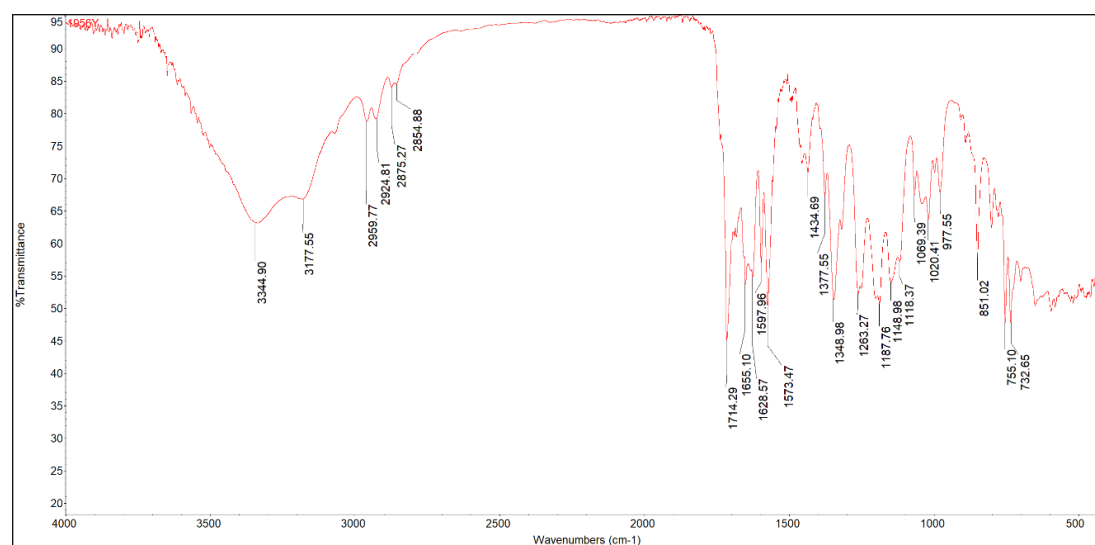

Figure S119.  $^1\text{H}$  NMR spectrum of hygrocin R (**12**)

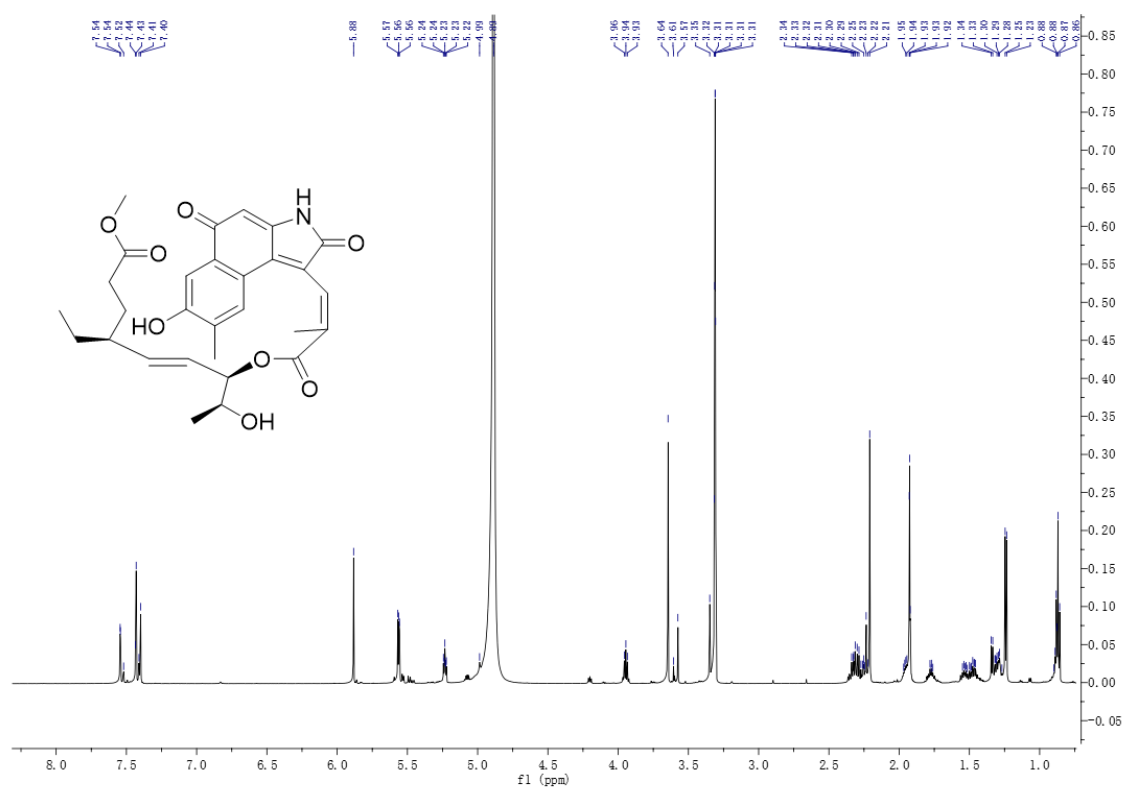

Figure S120.  $^1\text{H}$  NMR spectrum of hygrocin R (**12**)

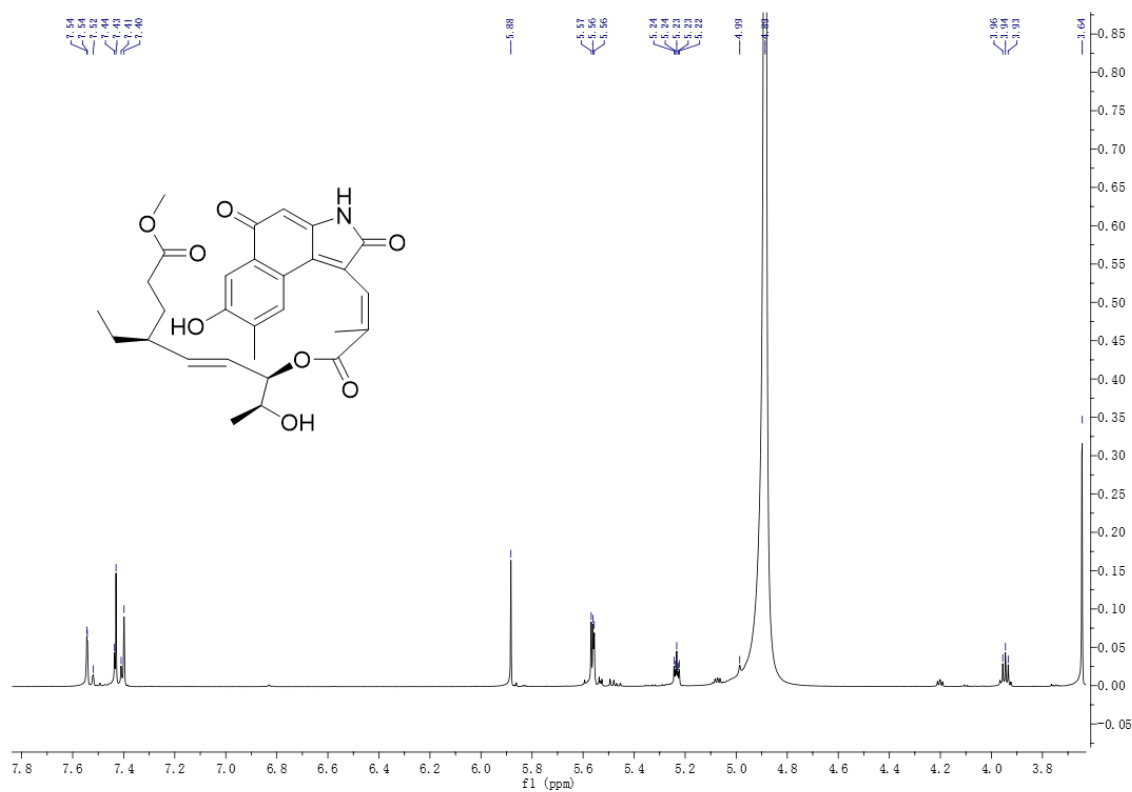

Figure S121.  $^1\text{H}$  NMR spectrum of hygrocin R (**12**)

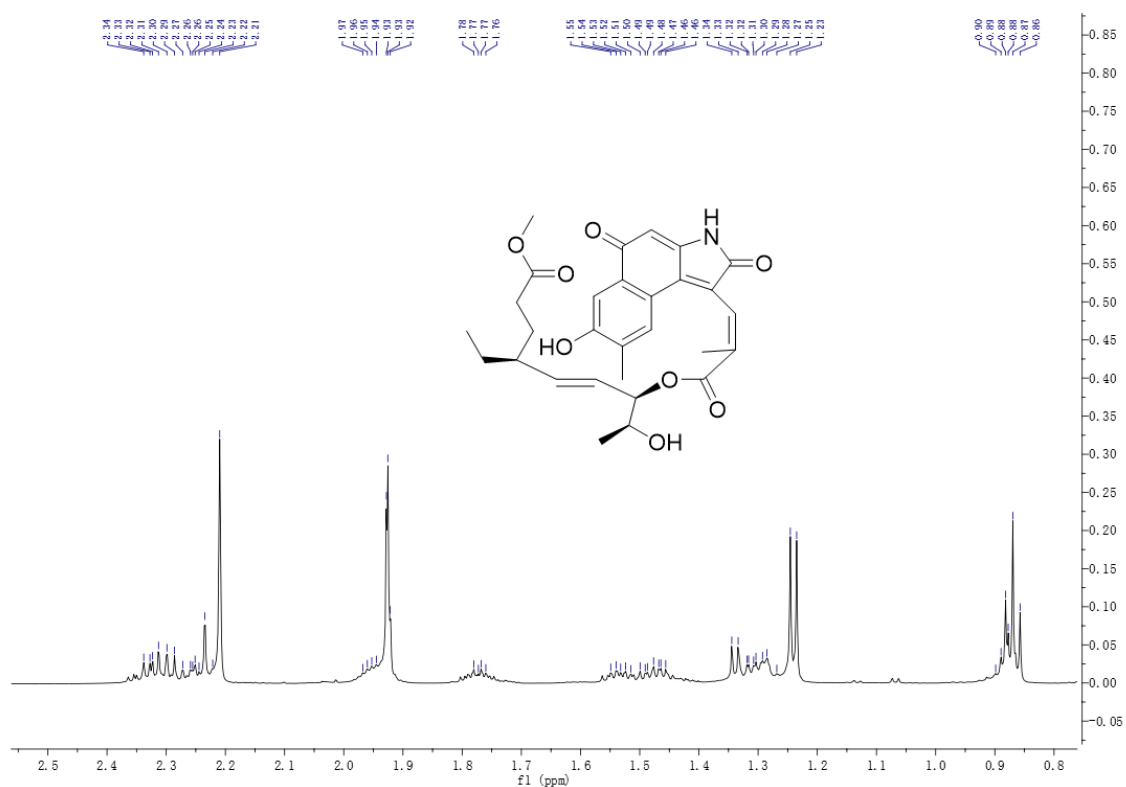

Figure S122.  $^{13}\text{C}$  NMR spectrum of hygrocin R (**12**)

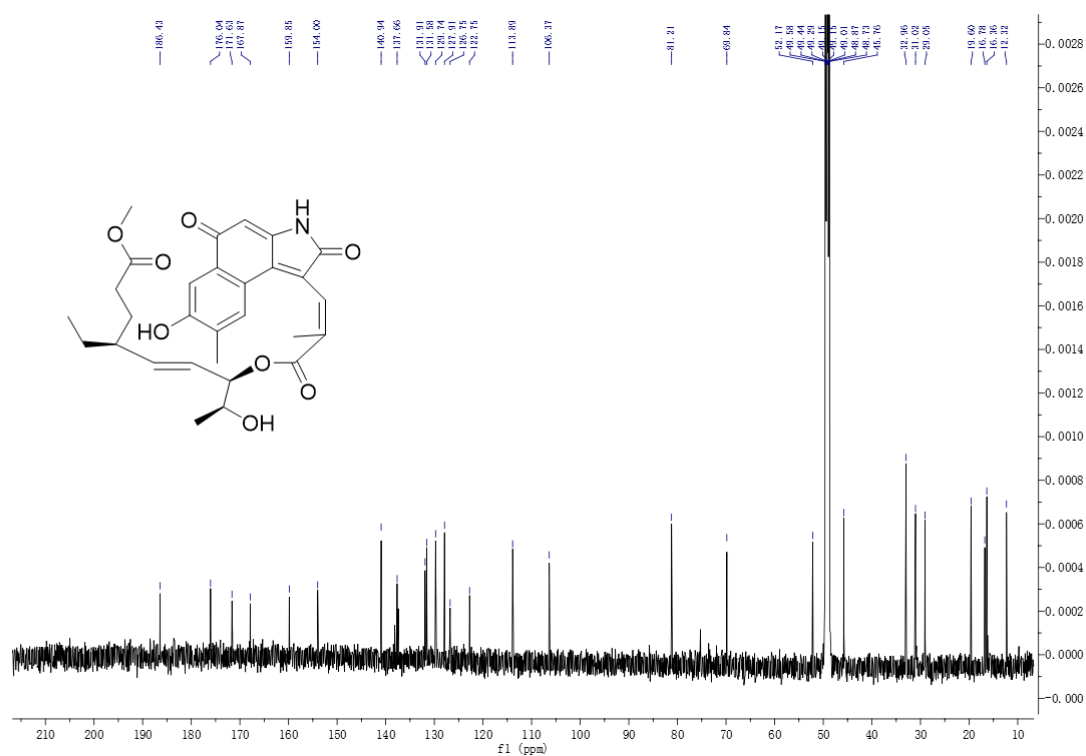

Figure S<sub>123</sub>. <sup>13</sup>C NMR spectrum of hygrocin R (12)

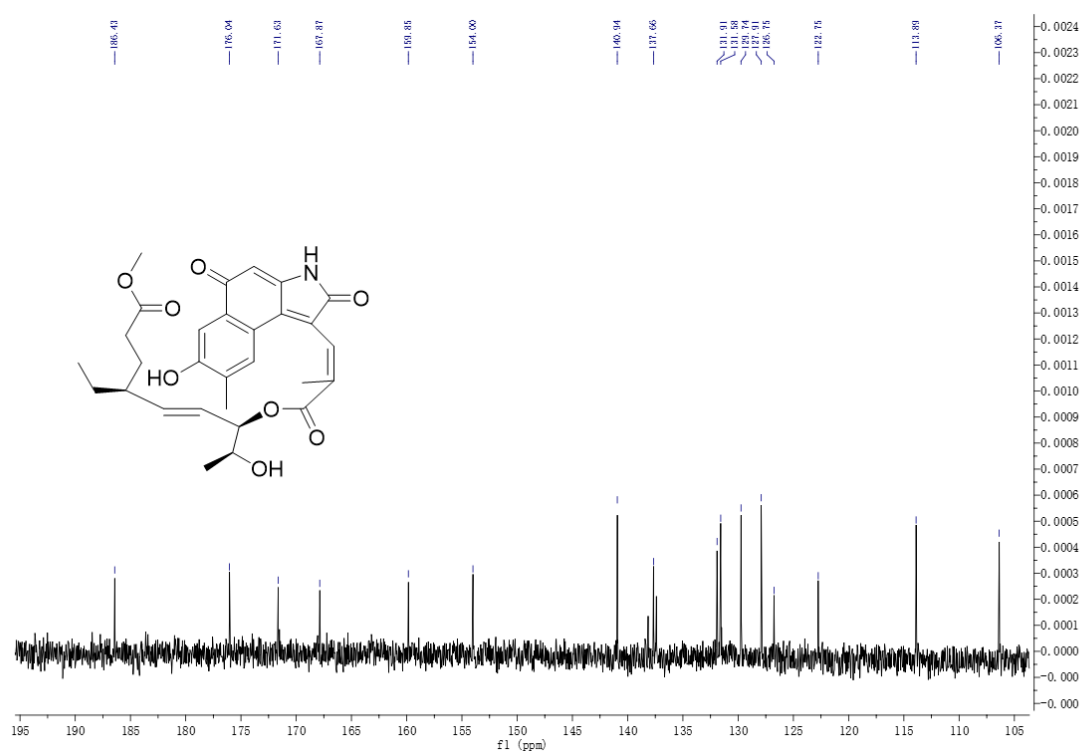

Figure S<sub>124</sub>. <sup>13</sup>C NMR spectrum of hygrocin R (12)

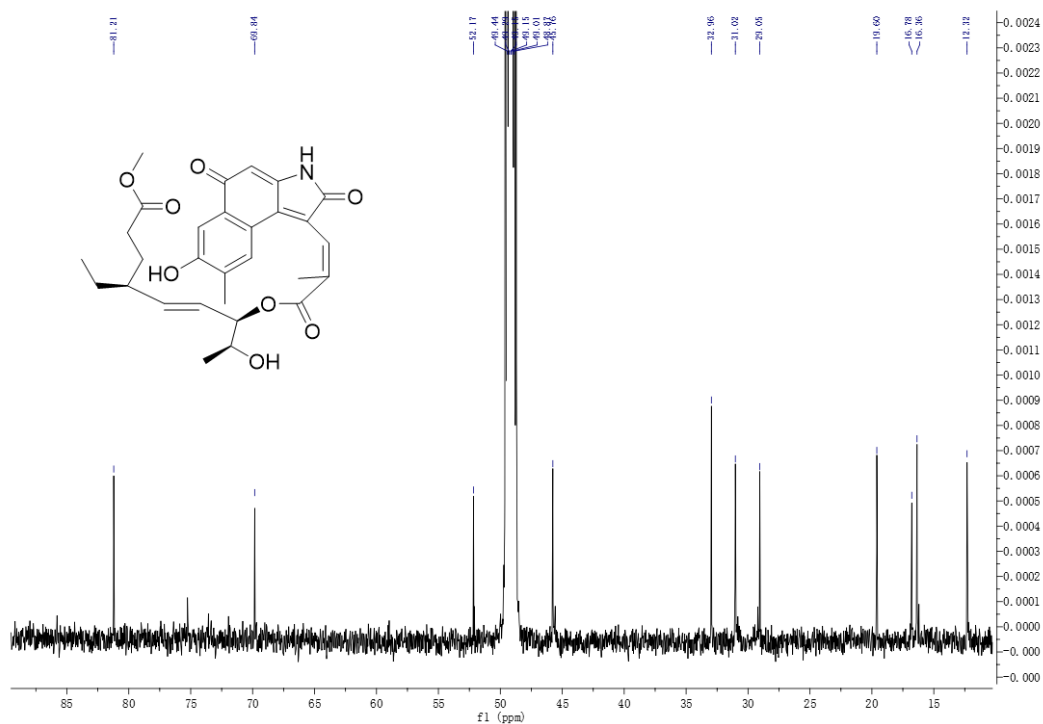



Figure S<sub>125</sub>. HMQC spectrum of hygrocin R (**12**)

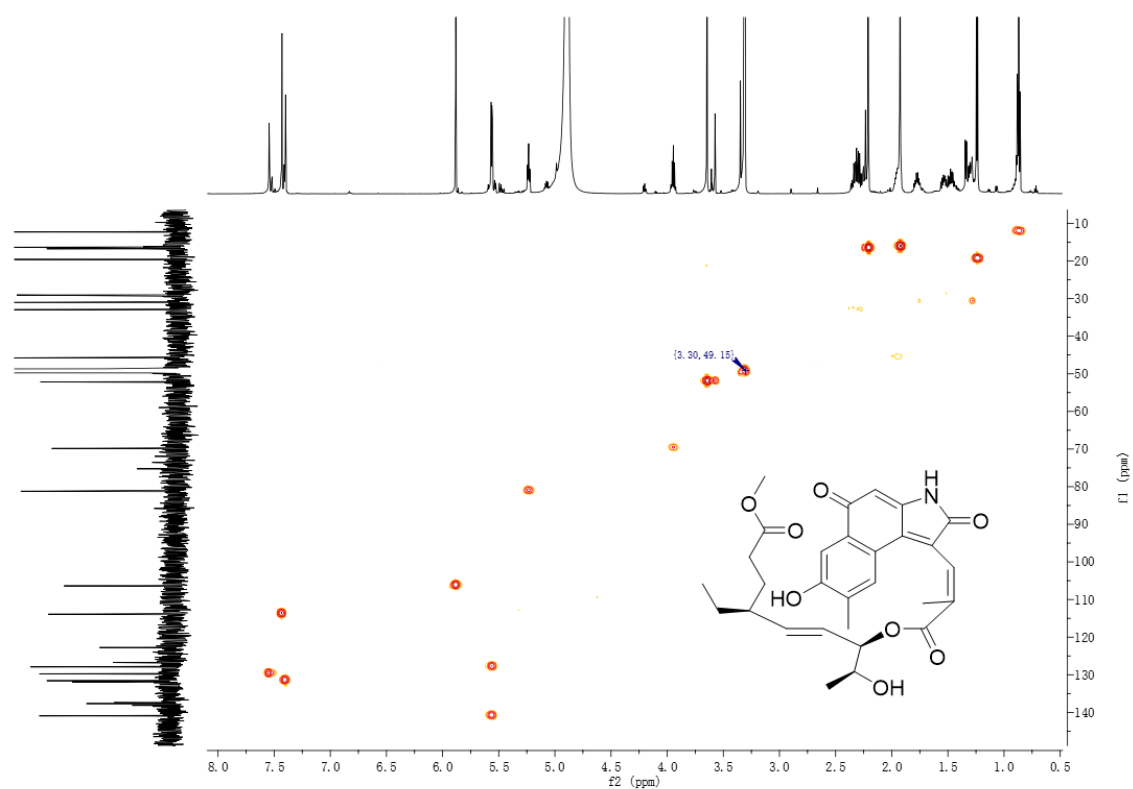

Figure S<sub>126</sub>. COSY spectrum of hygrocin R (**12**)

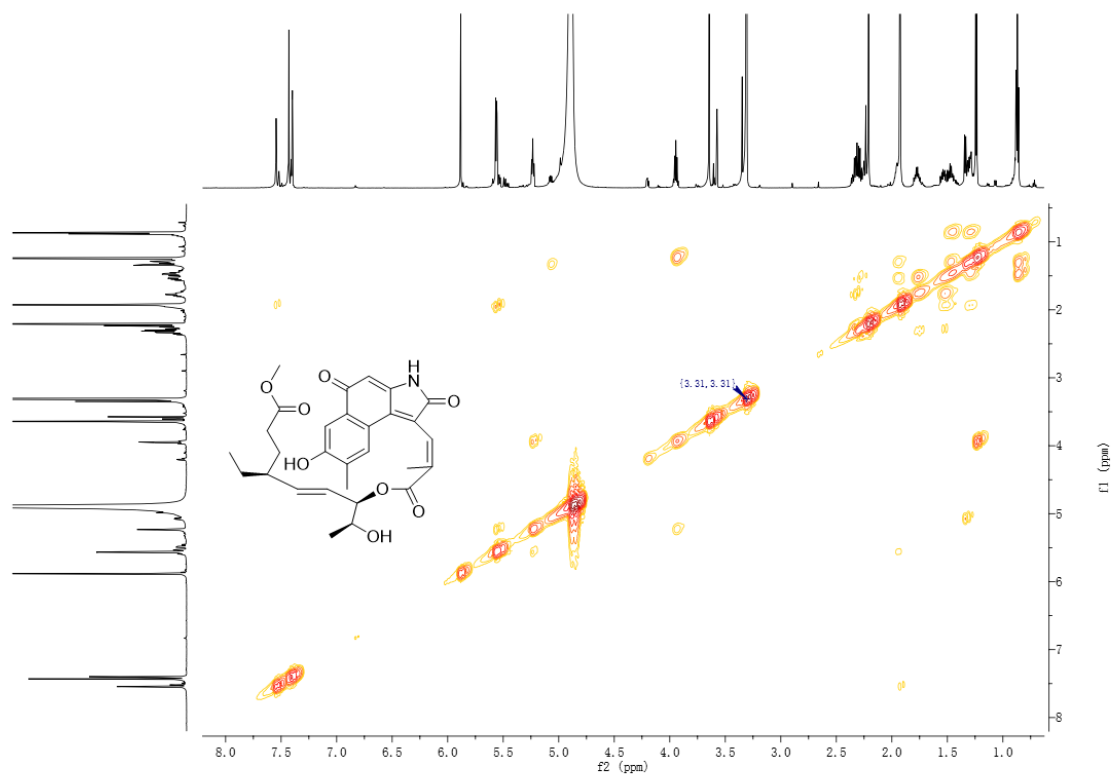

Figure S127. HMBC spectrum of hygrocin R (12)

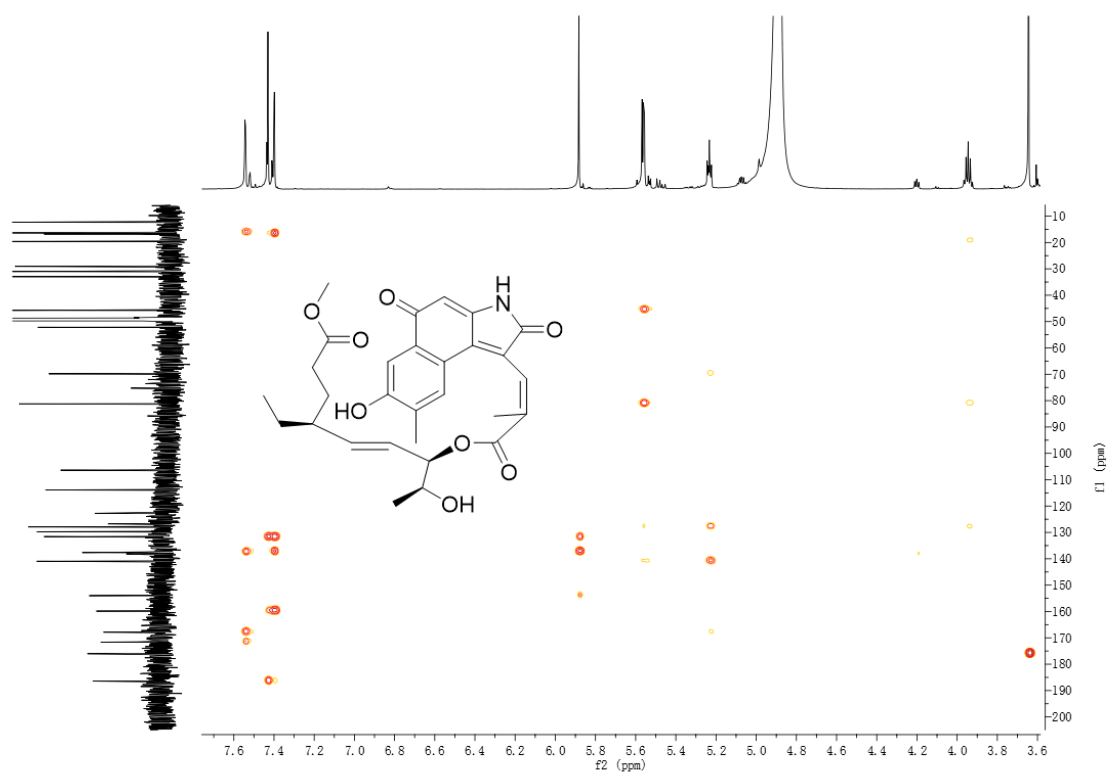

Figure S128. HMBC spectrum of hygrocin R (12)

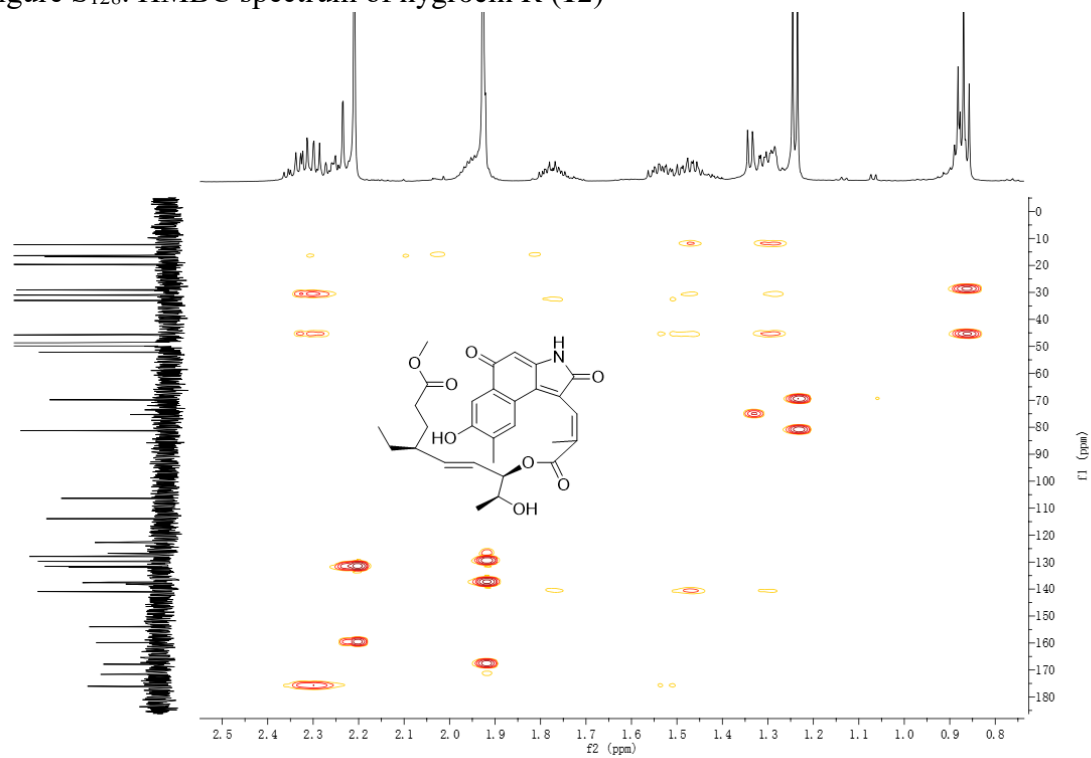

Figure S<sub>129</sub>. NOESY spectrum of hygrocin R (**12**)

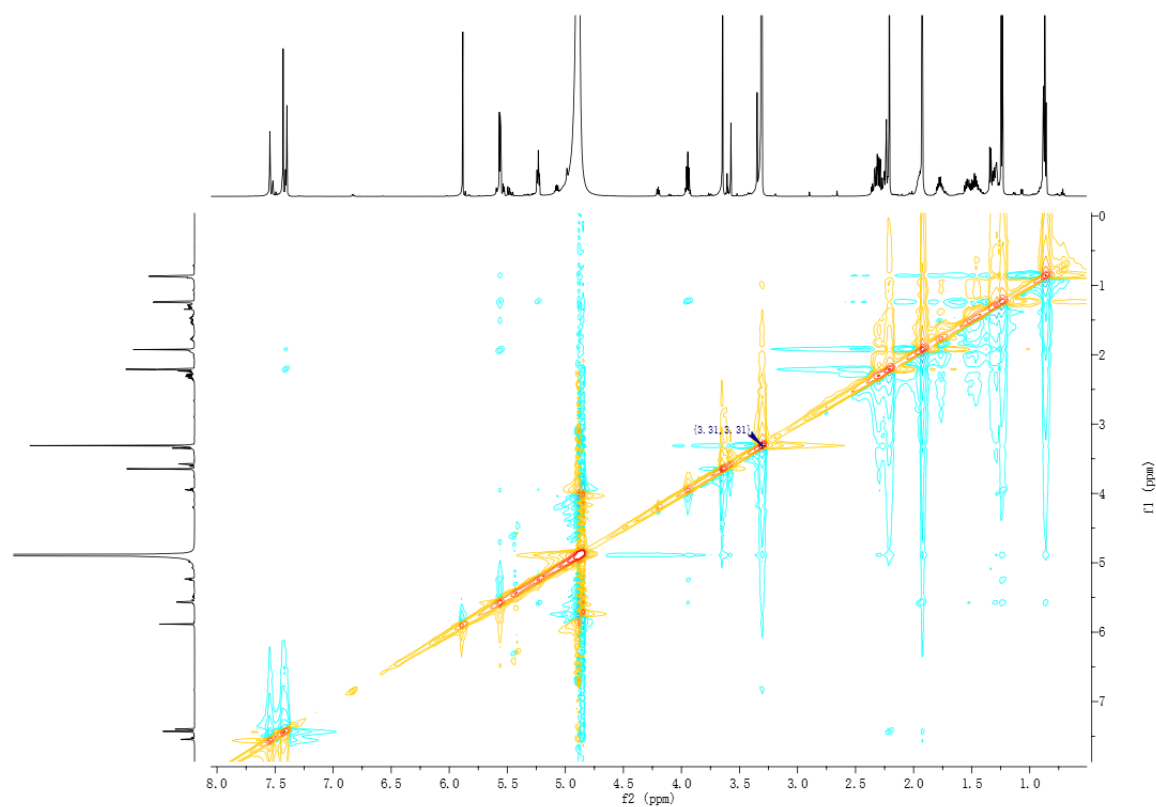

Figure S<sub>130</sub>. HRESIMS spectrum of hygrocin R (**12**)

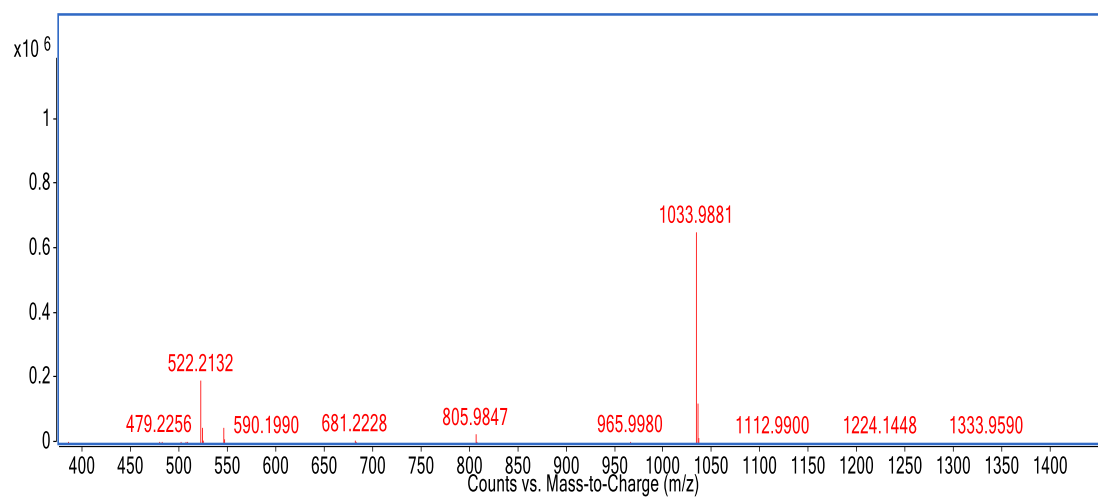

Figure S<sub>131</sub>. UV spectrum of hygrocin R (**12**)

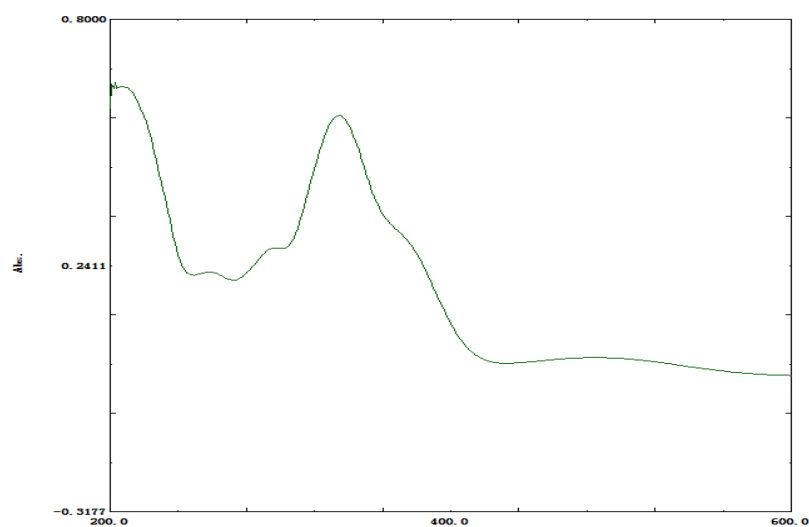

Figure S<sub>132</sub>. IR spectrum of hygrocin R (**12**)

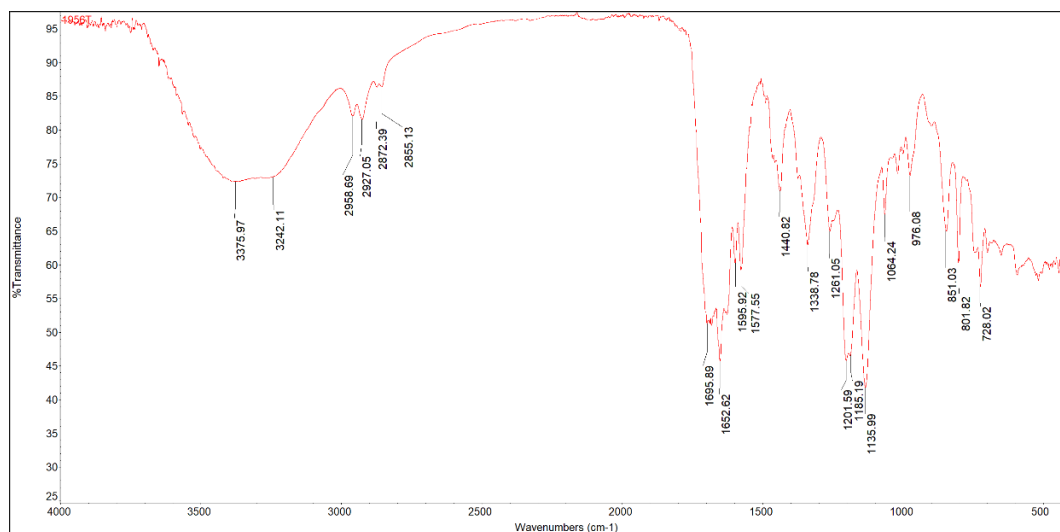

Figure S<sub>133</sub>. <sup>1</sup>H NMR spectrum of hygrocinn S (**13**)

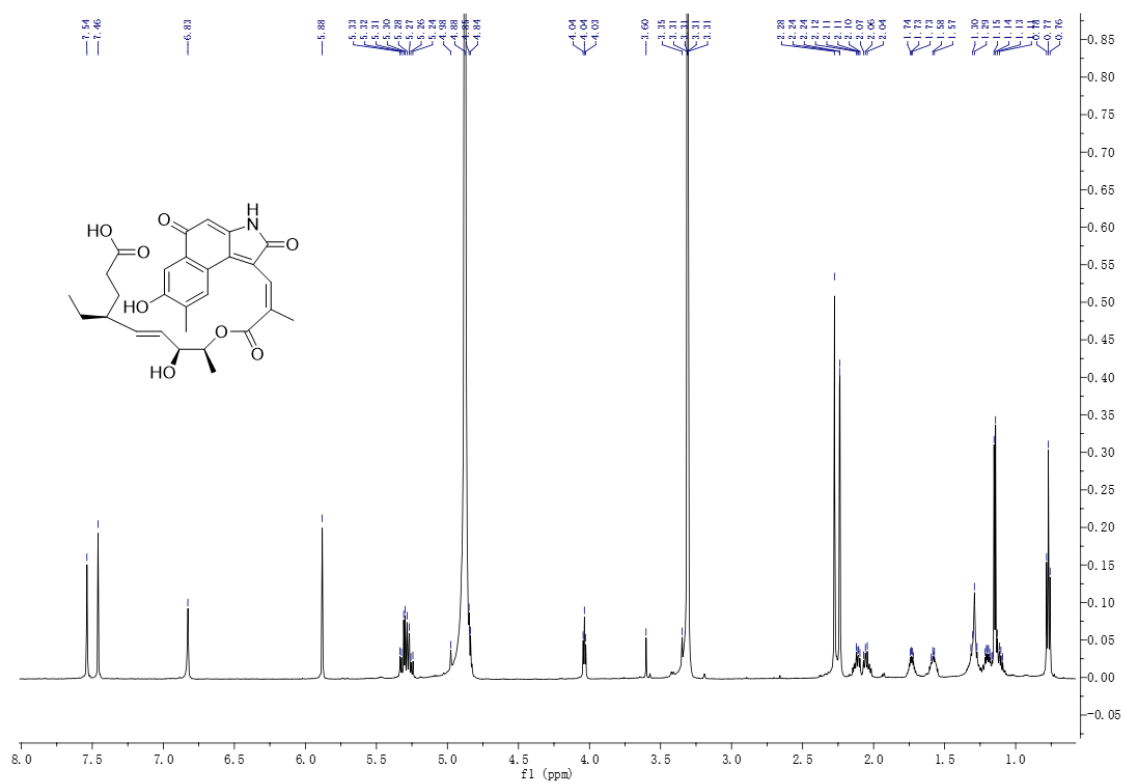

Figure S<sub>134</sub>. <sup>1</sup>H NMR spectrum of hygrocinn S (**13**)

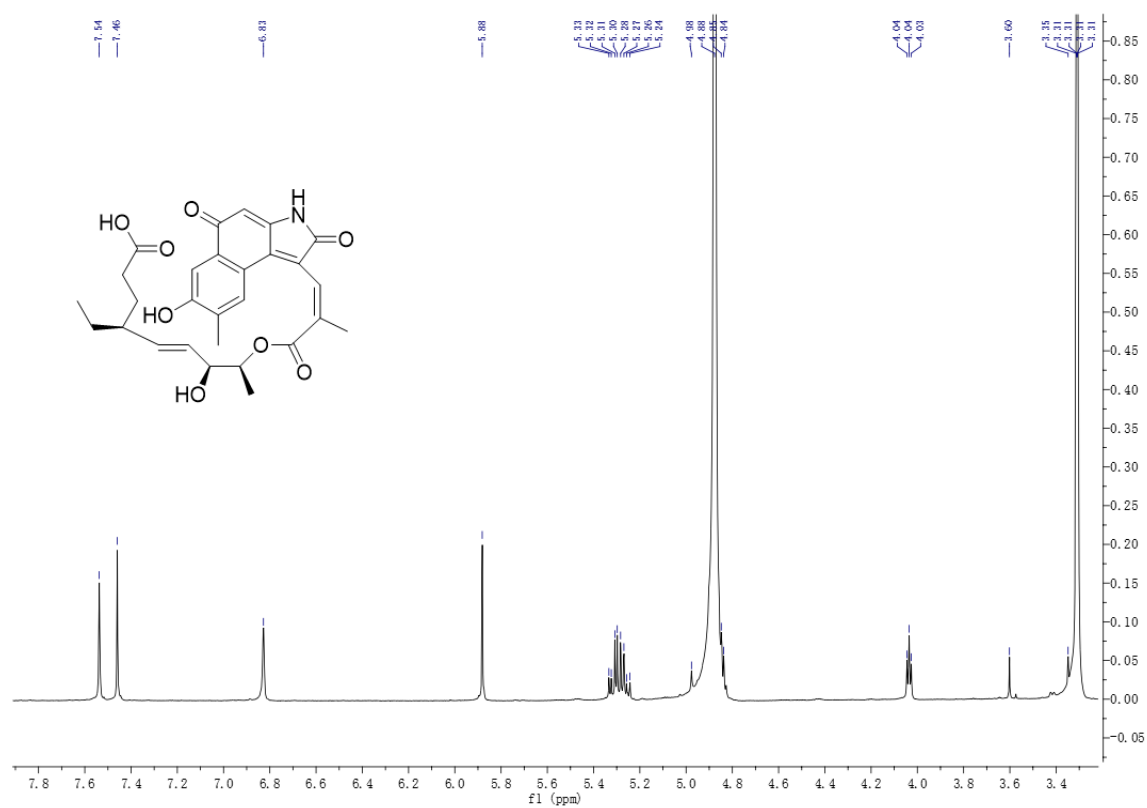

Figure S135.  $^1\text{H}$  NMR spectrum of hygrocin S (**13**)

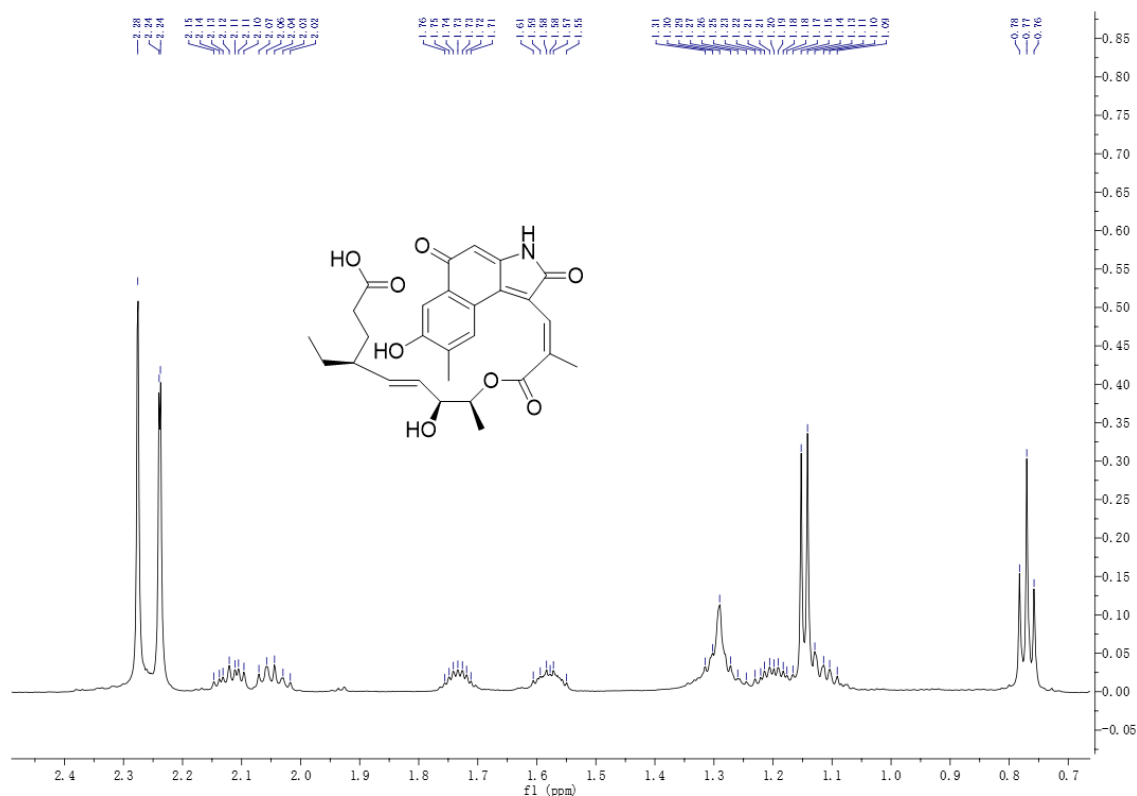

Figure S136.  $^{13}\text{C}$  NMR spectrum of hygrocin S (**13**)

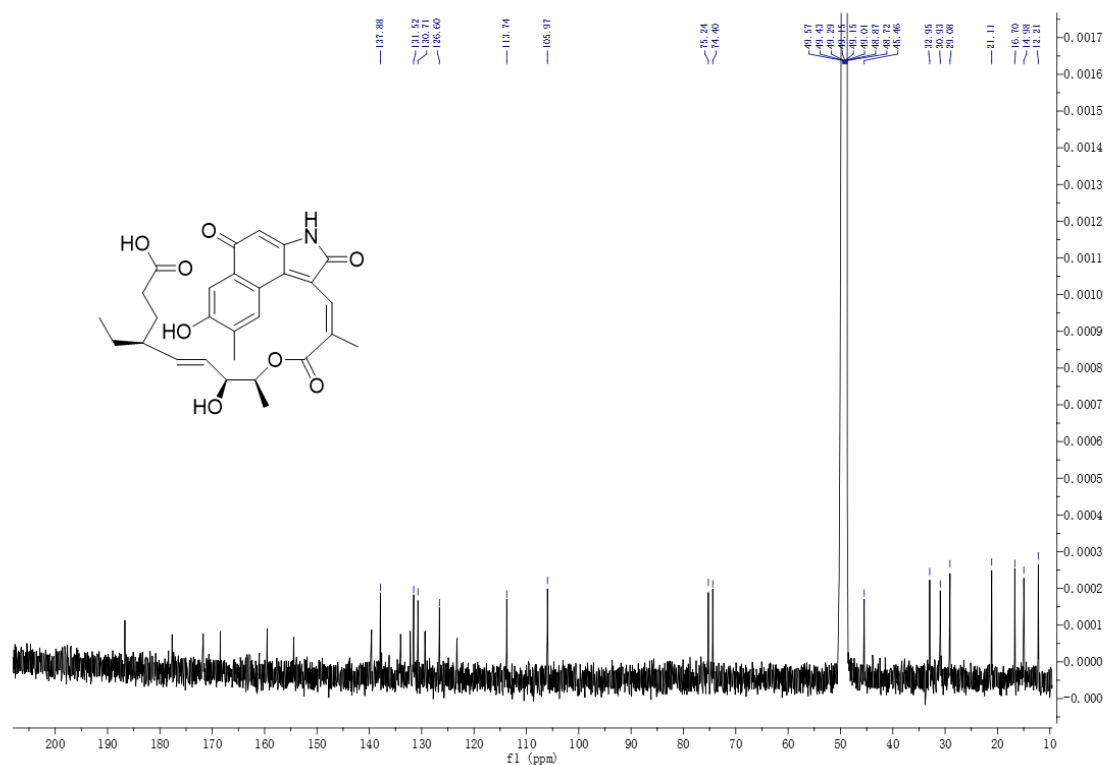

Figure S137.  $^{13}\text{C}$  NMR spectrum of hygrocin S (**13**)

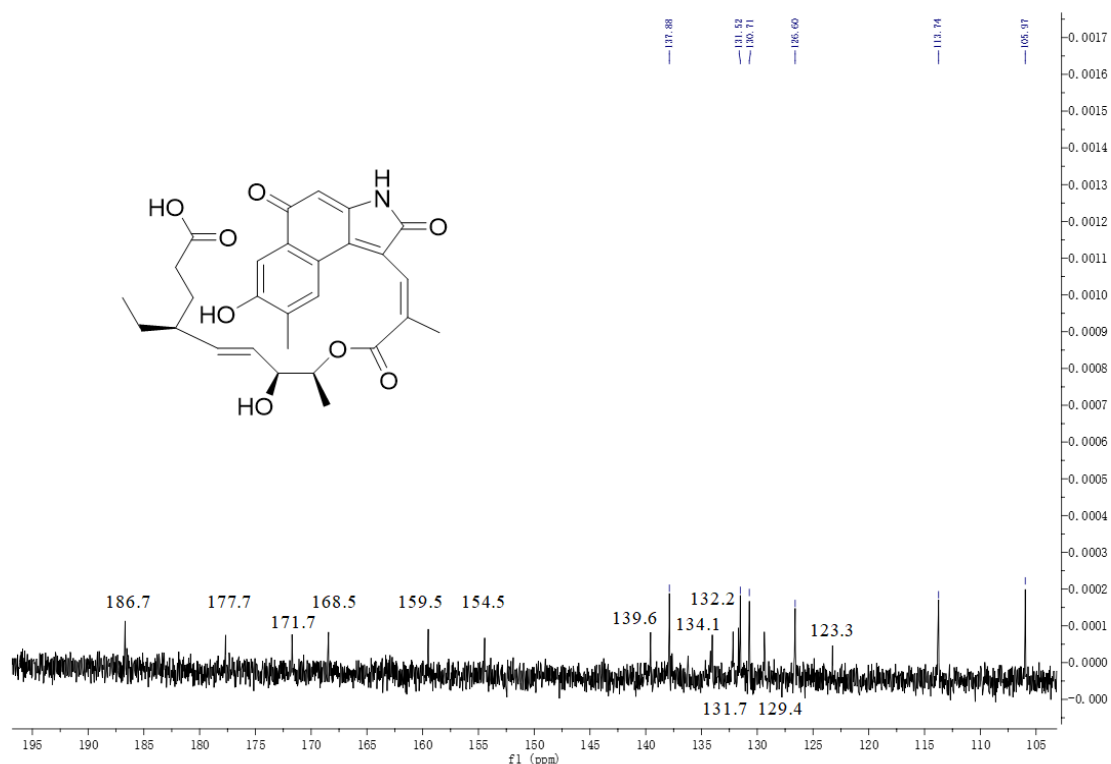

Figure S138.  $^{13}\text{C}$  NMR spectrum of hygrocin S (**13**)

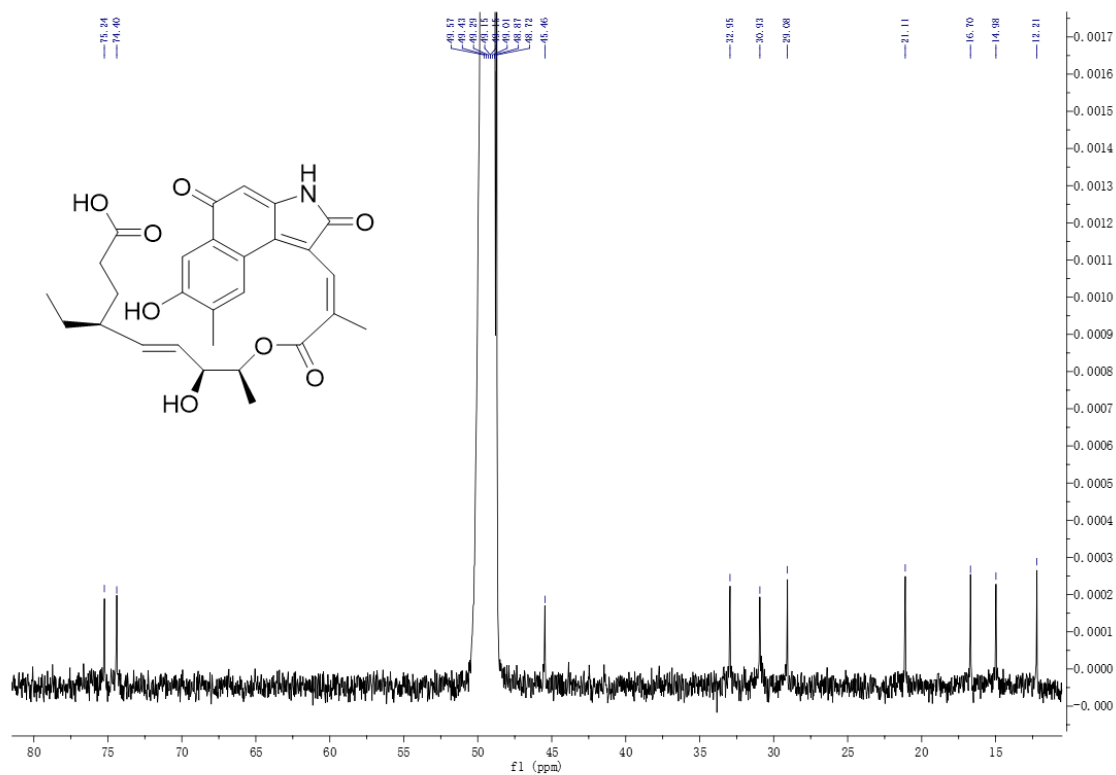

Figure S<sub>139</sub>. HMQC spectrum of hygrocin S (**13**)

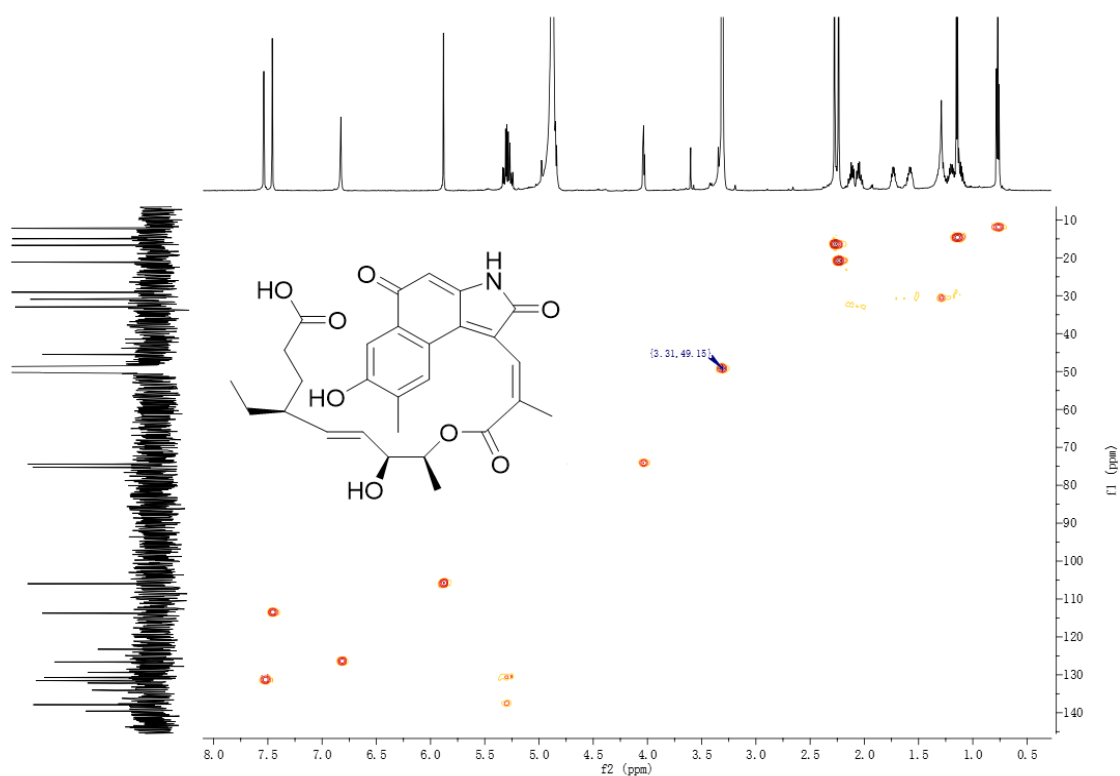

Figure S<sub>140</sub>. COSY spectrum of hygrocin S (**13**)

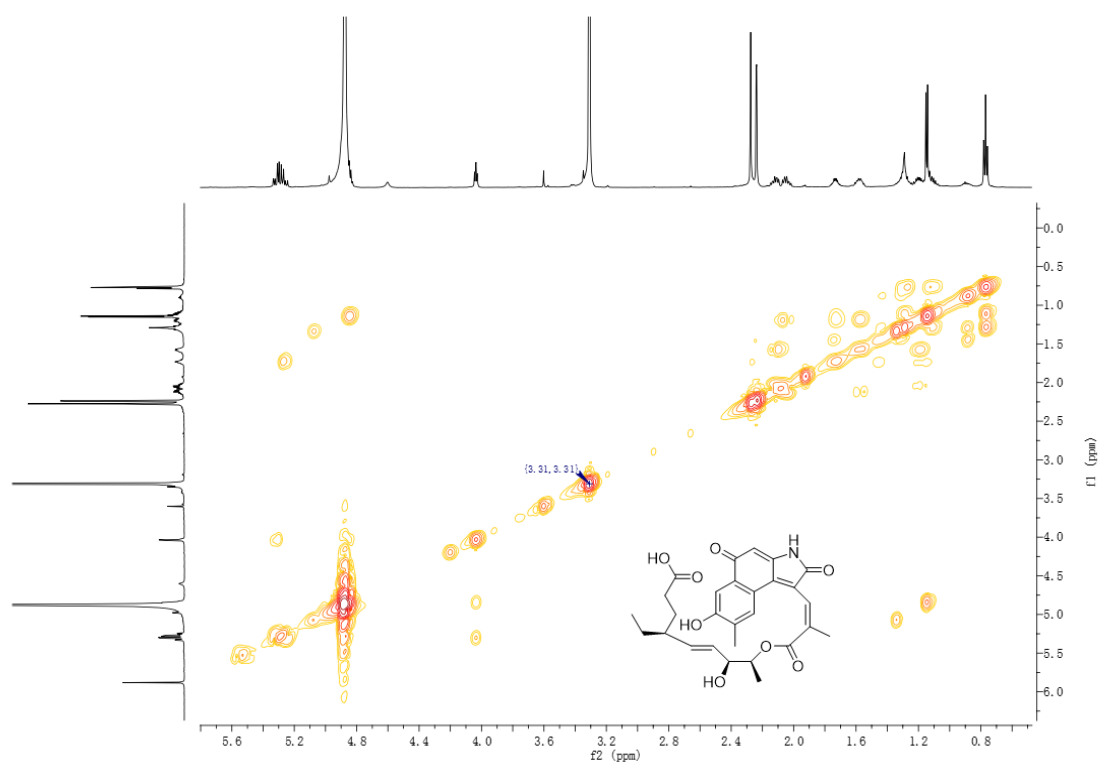



Figure S<sub>141</sub>. HMBC spectrum of hygrocin S (**13**)

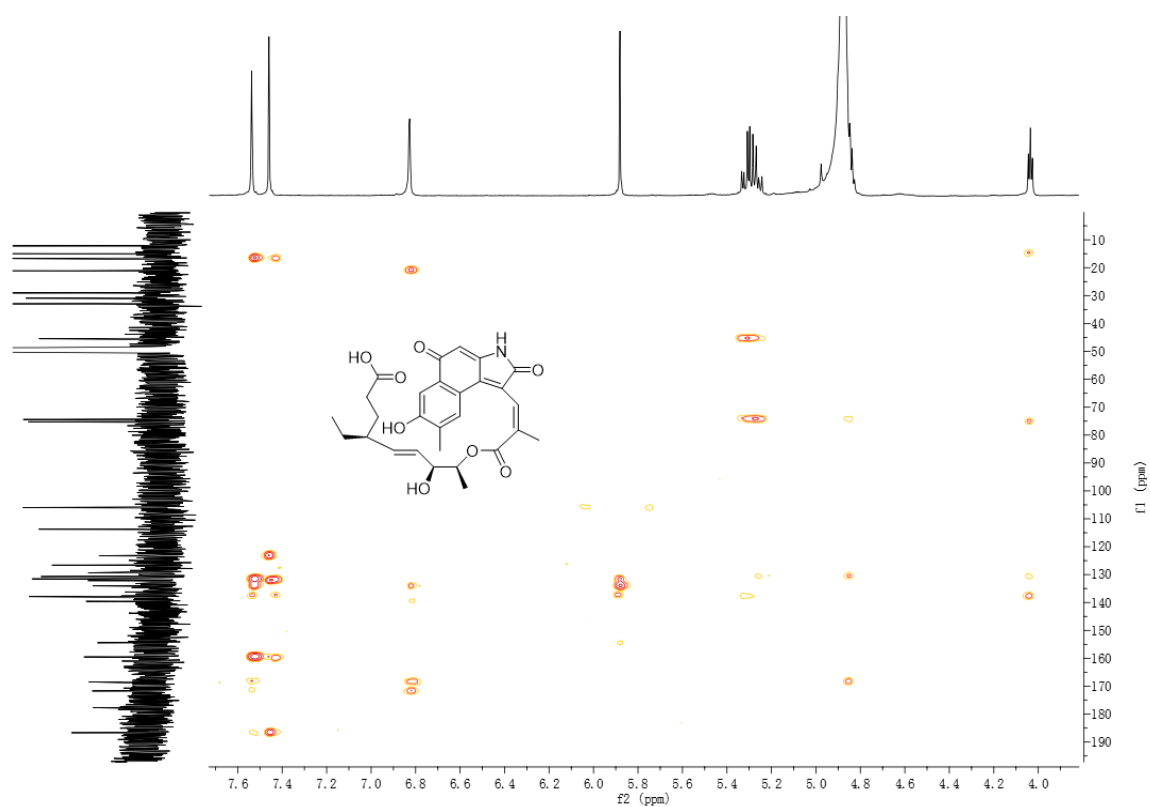

Figure S<sub>142</sub>. HMBC spectrum of hygrocin S (**13**)

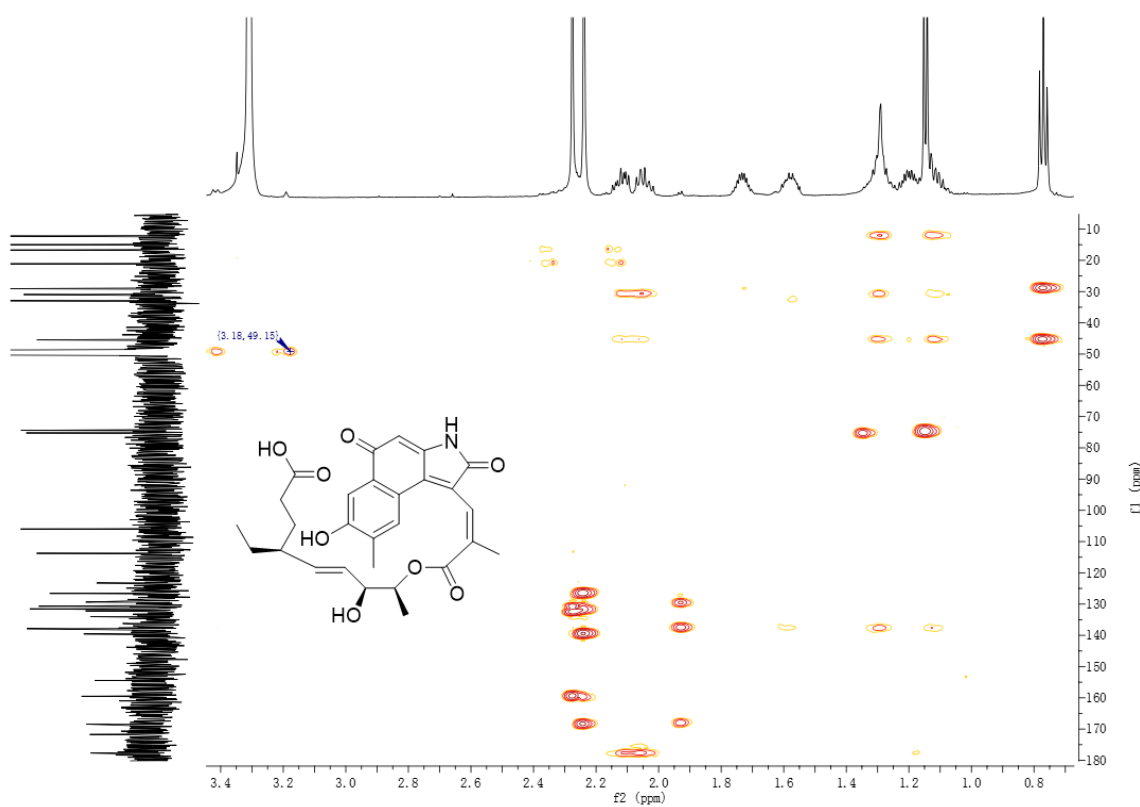

Figure S<sub>143</sub>. NOESY spectrum of hygrocin S (**13**)

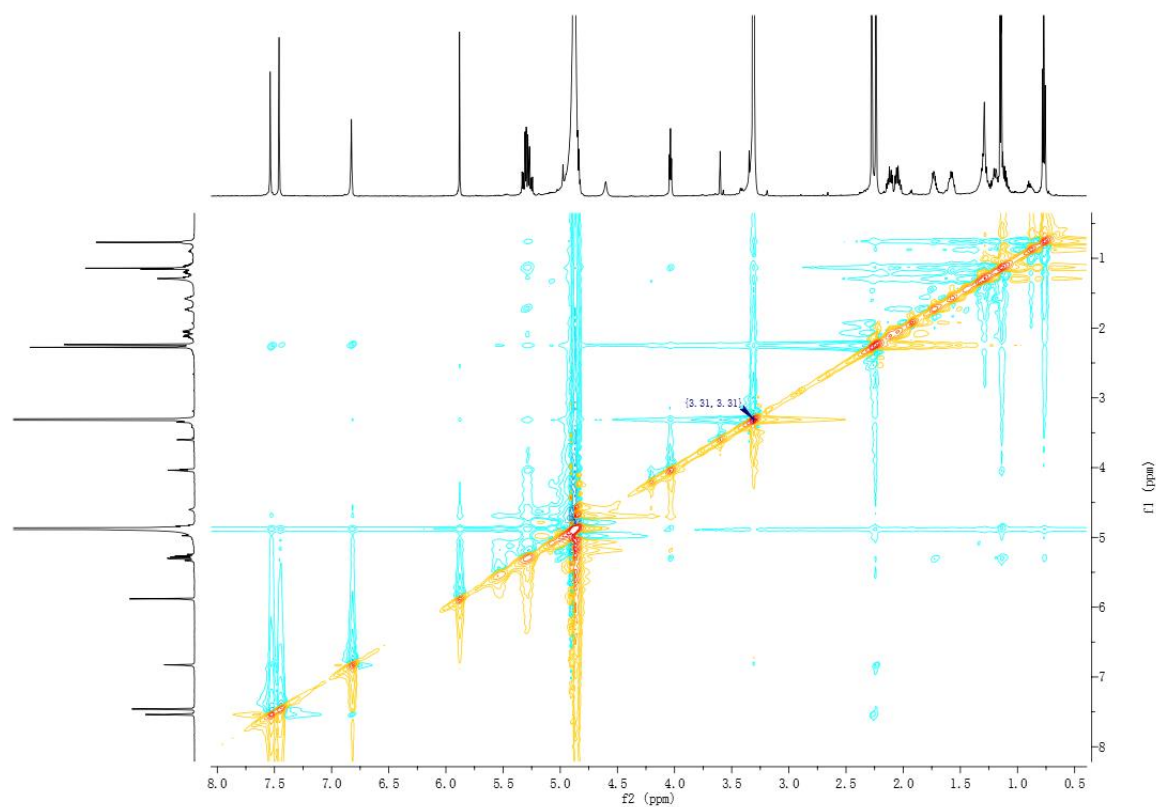

Figure S<sub>144</sub>. HRESIMS spectrum of hygrocin S (**13**)

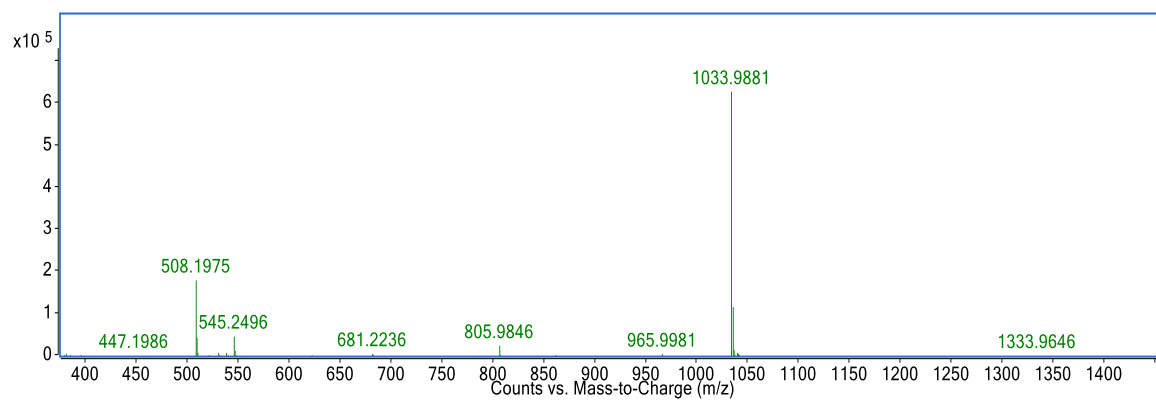

Figure S<sub>145</sub>. UV spectrum of hygrocin S (**13**)

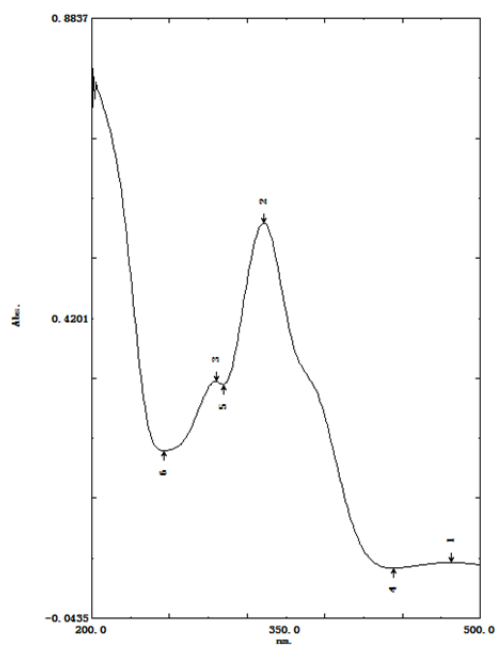

Figure S<sub>146</sub>. IR spectrum of hygrocin S (**13**)

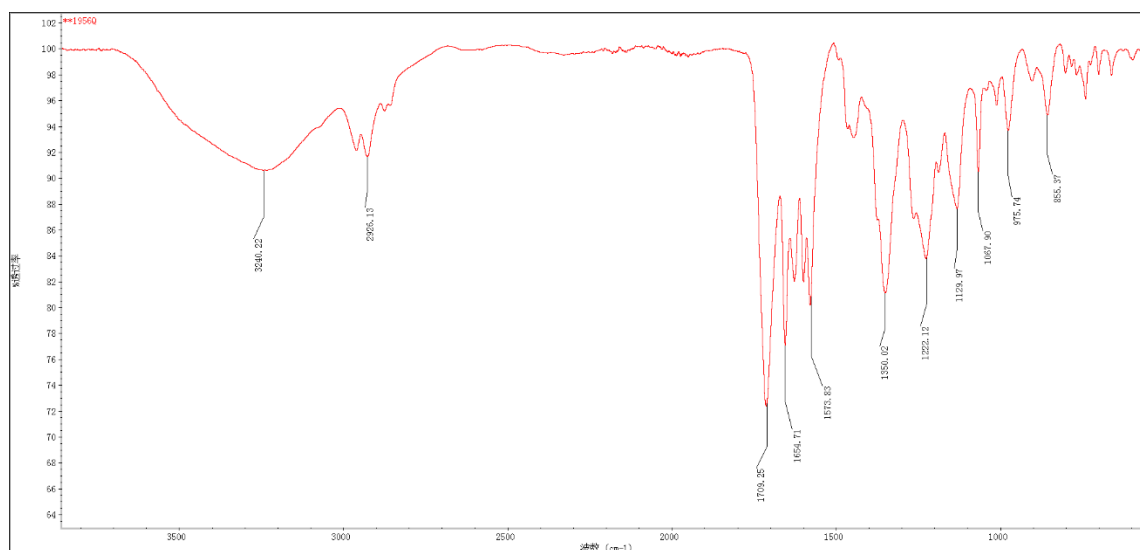

Figure S147.  $^1\text{H}$  NMR spectrum of hygrocin T (**17**)

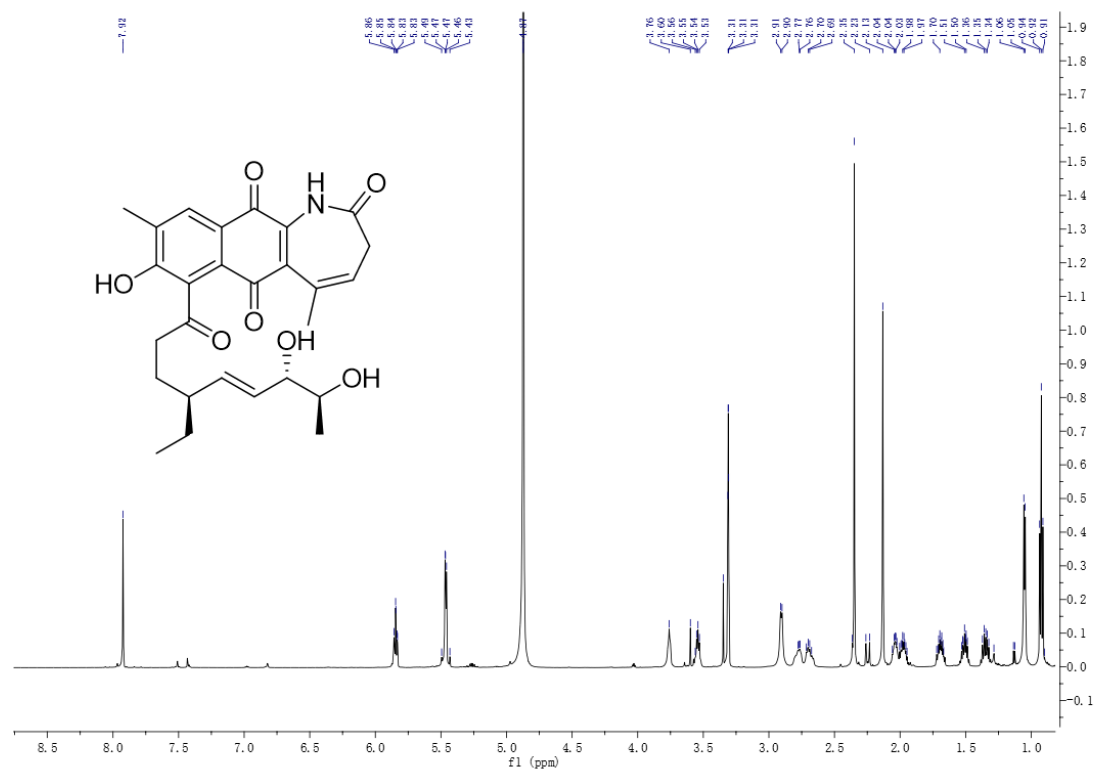

Figure S148.  $^1\text{H}$  NMR spectrum of hygrocin T (**17**)

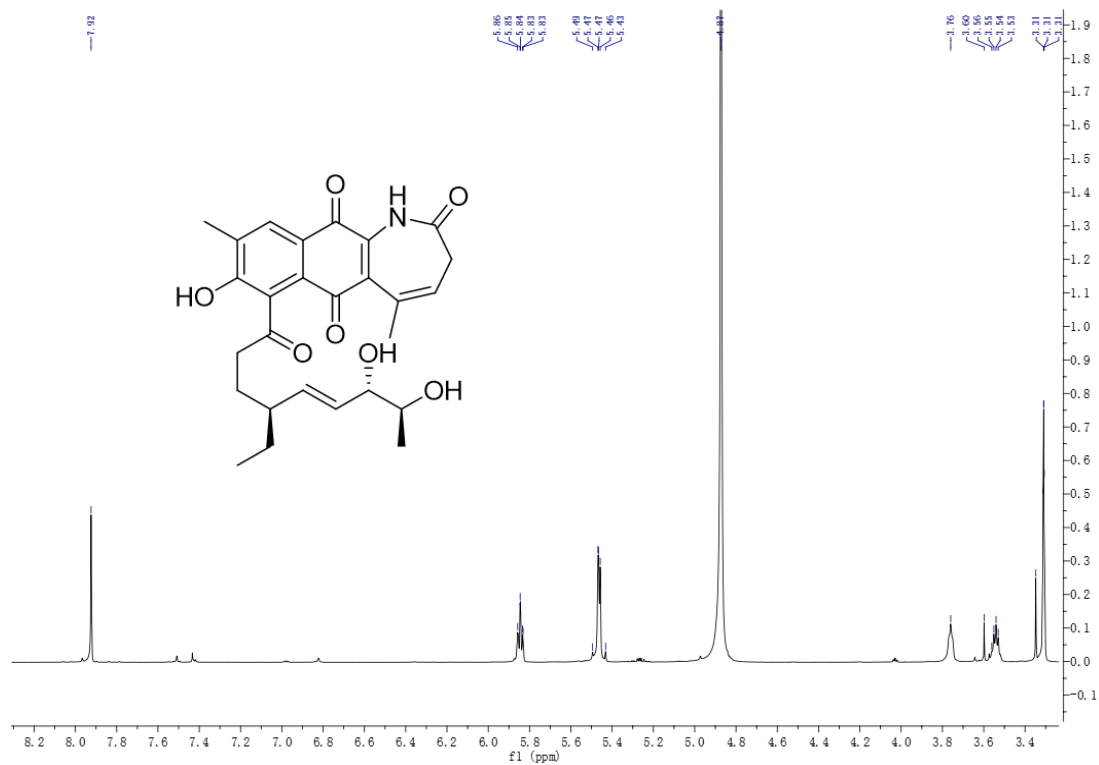

Figure S<sub>149</sub>. <sup>1</sup>H NMR spectrum of hygrocin T (17)

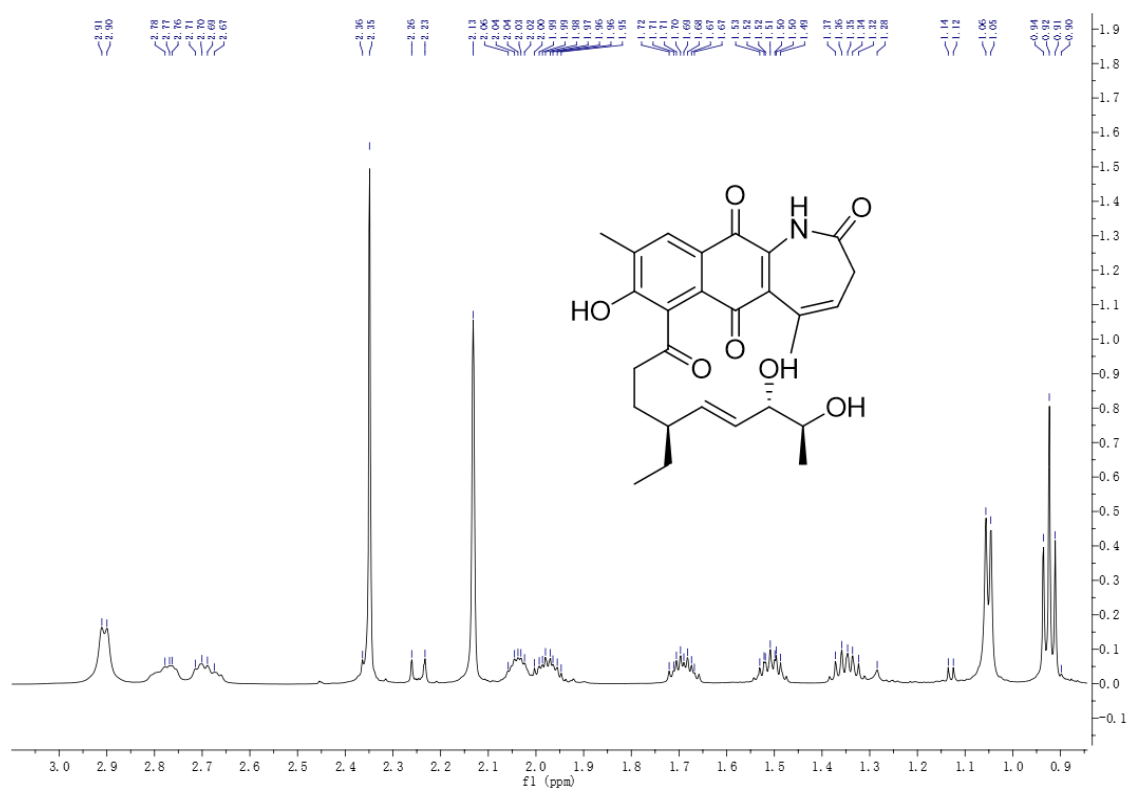

Figure S<sub>150</sub>. <sup>13</sup>C NMR spectrum of hygrocin T (17)

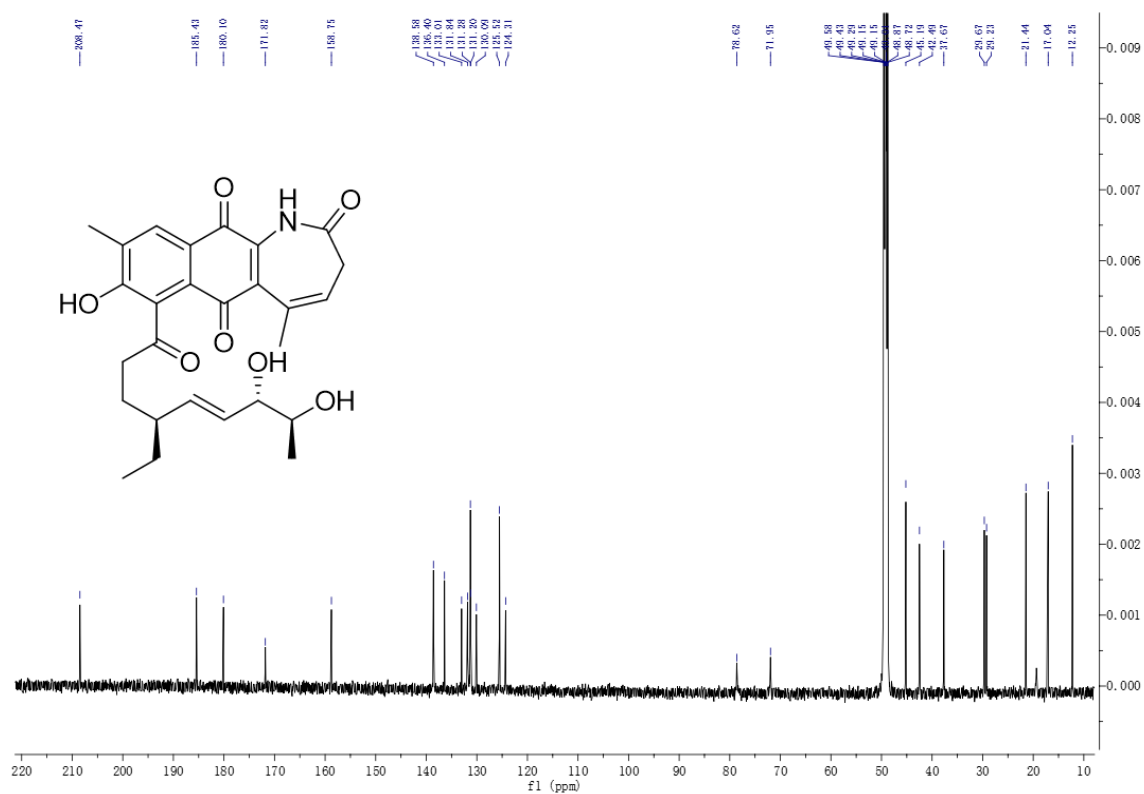

Figure S151.  $^{13}\text{C}$  NMR spectrum of hygrocin T (17)

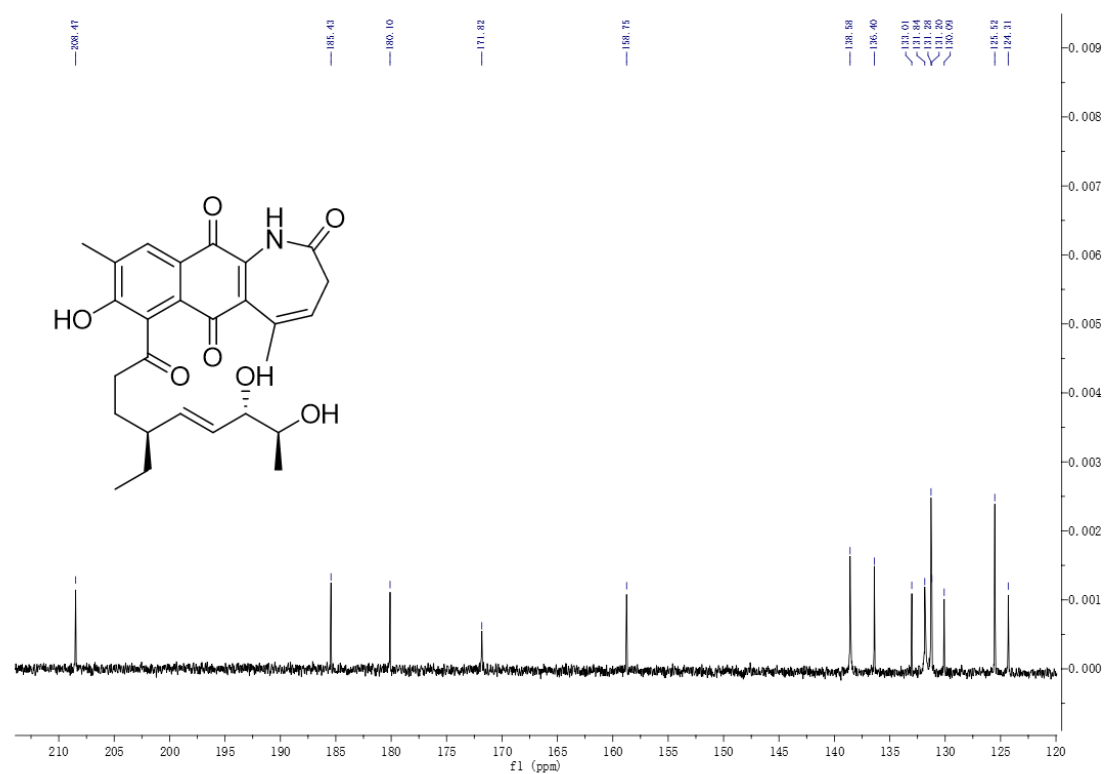

Figure S152.  $^{13}\text{C}$  NMR spectrum of hygrocin T (17)

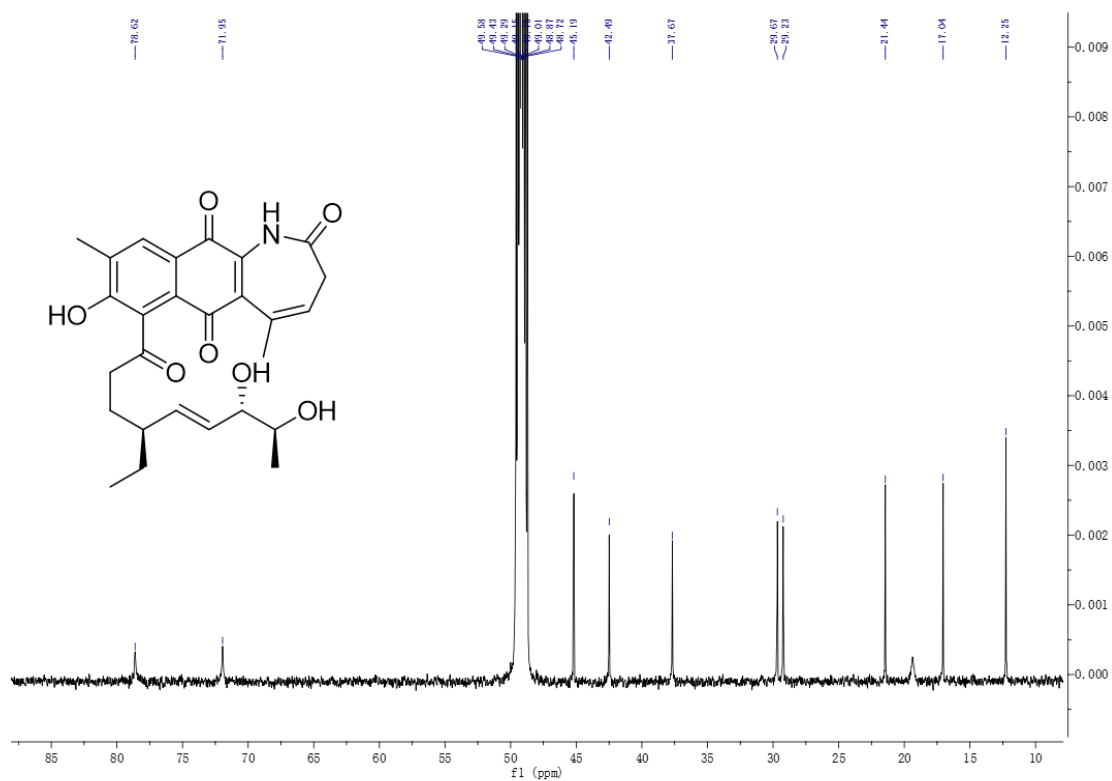

Figure S153. HMQC spectrum of hygrocin T (17)

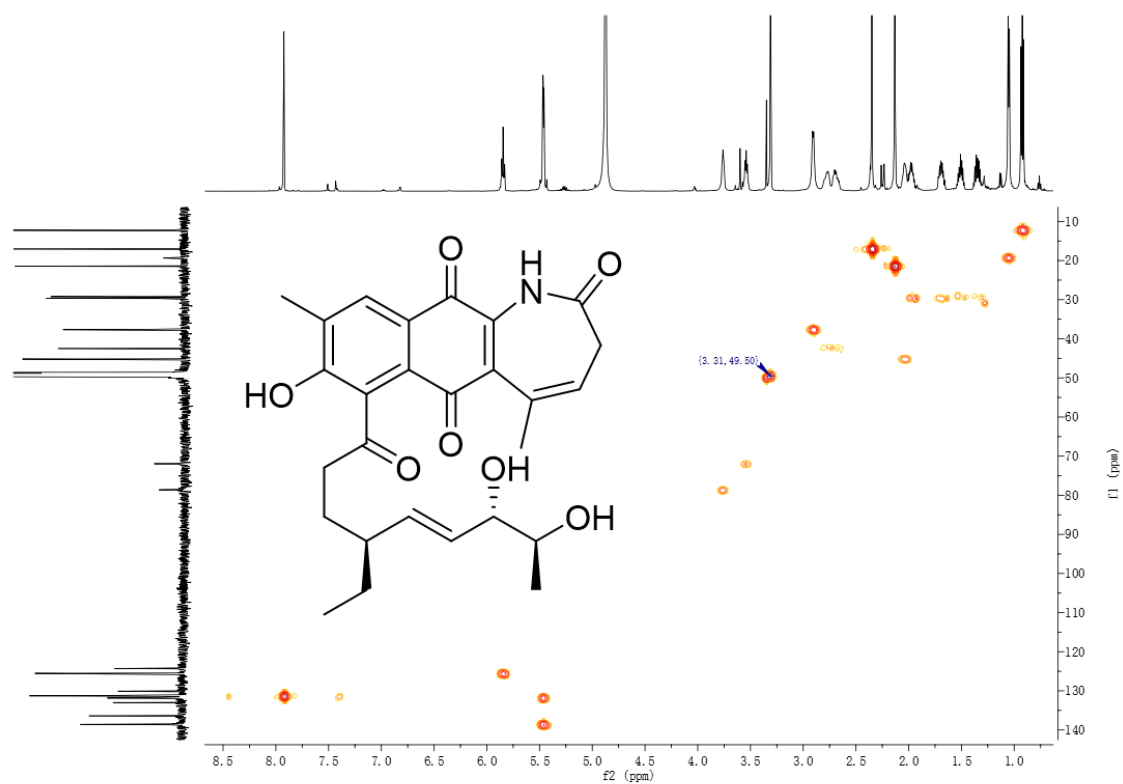

Figure S154. COSY spectrum of hygrocin T (17)

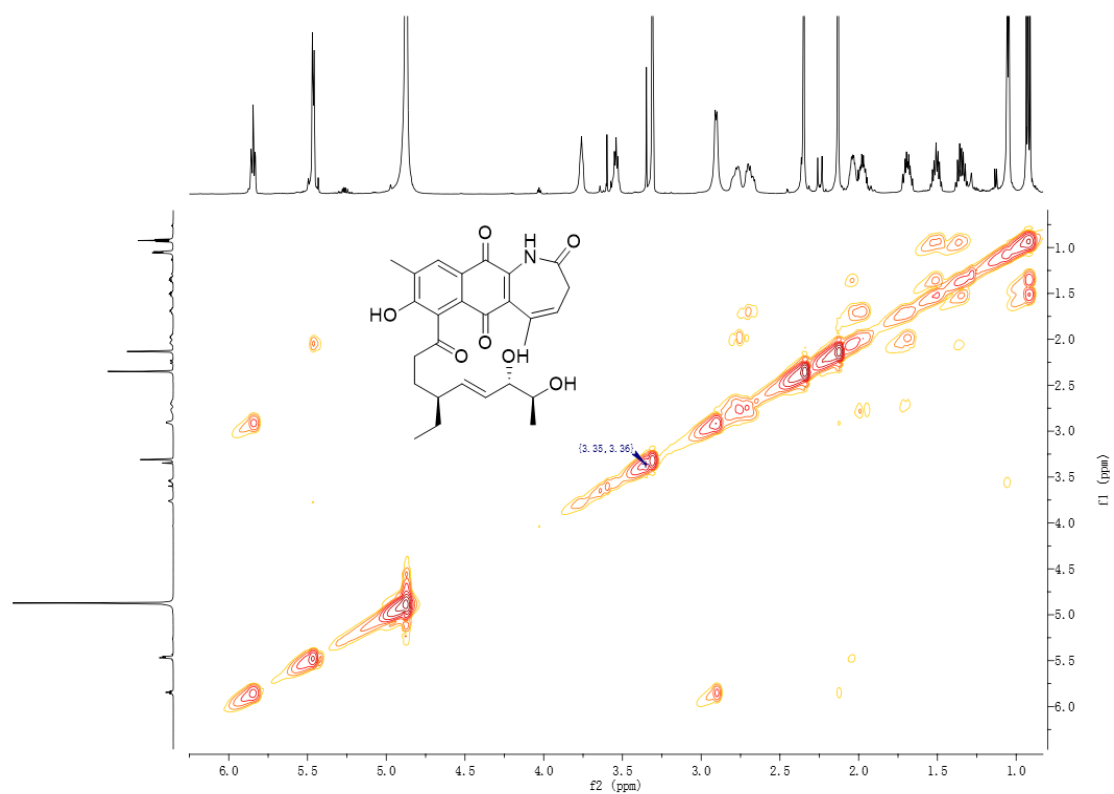

Figure S155. HMBC spectrum of hygrocin T (17)

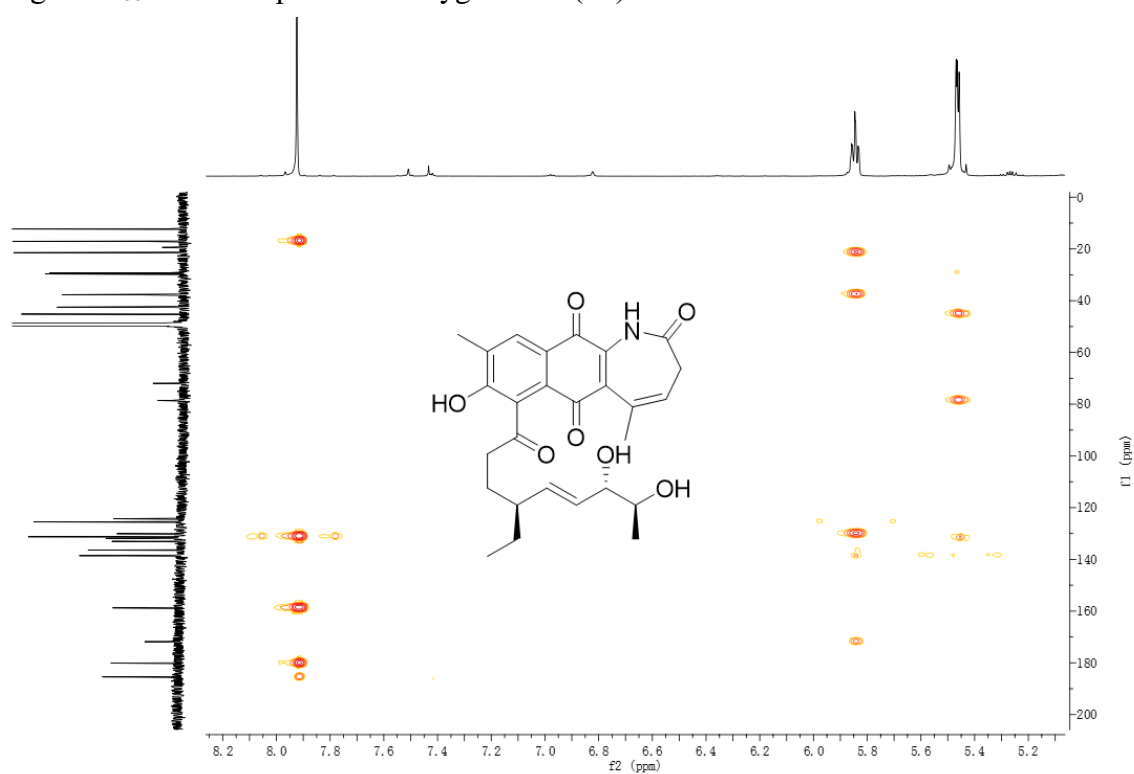

Figure S156. HMBC spectrum of hygrocin T (17)

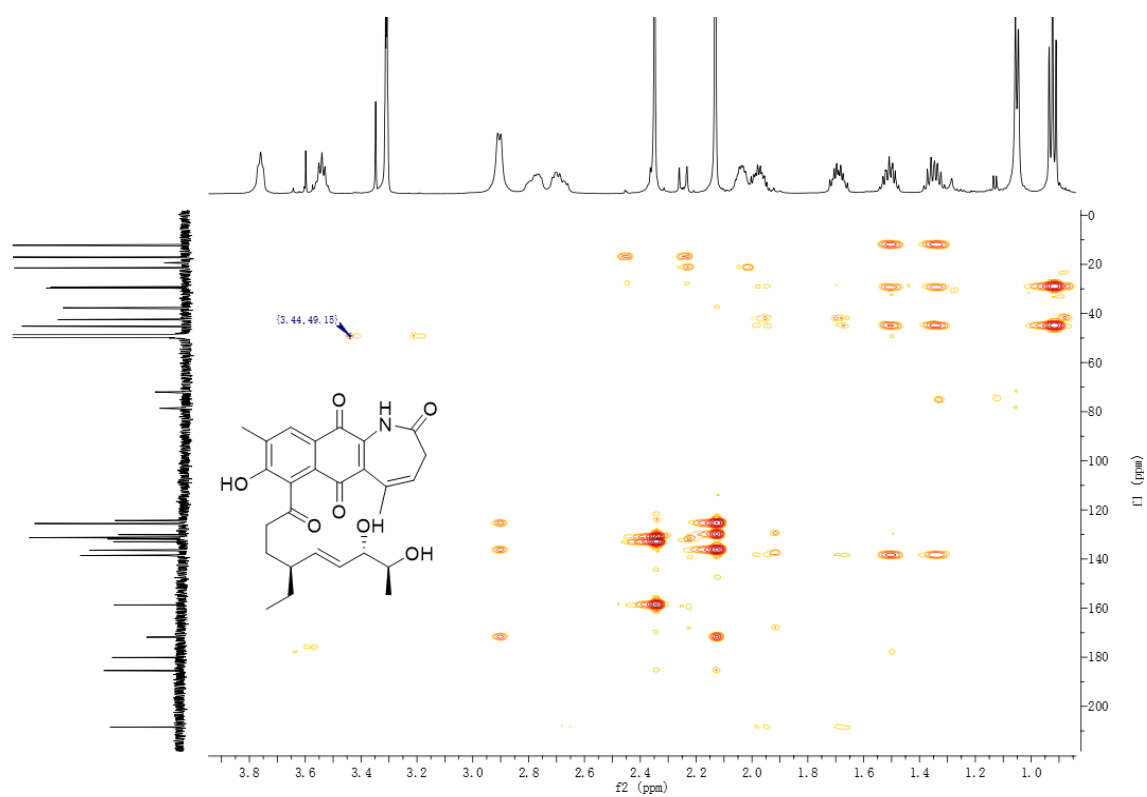



Figure S<sub>157</sub>. NOESY spectrum of hygrocin T (**17**)

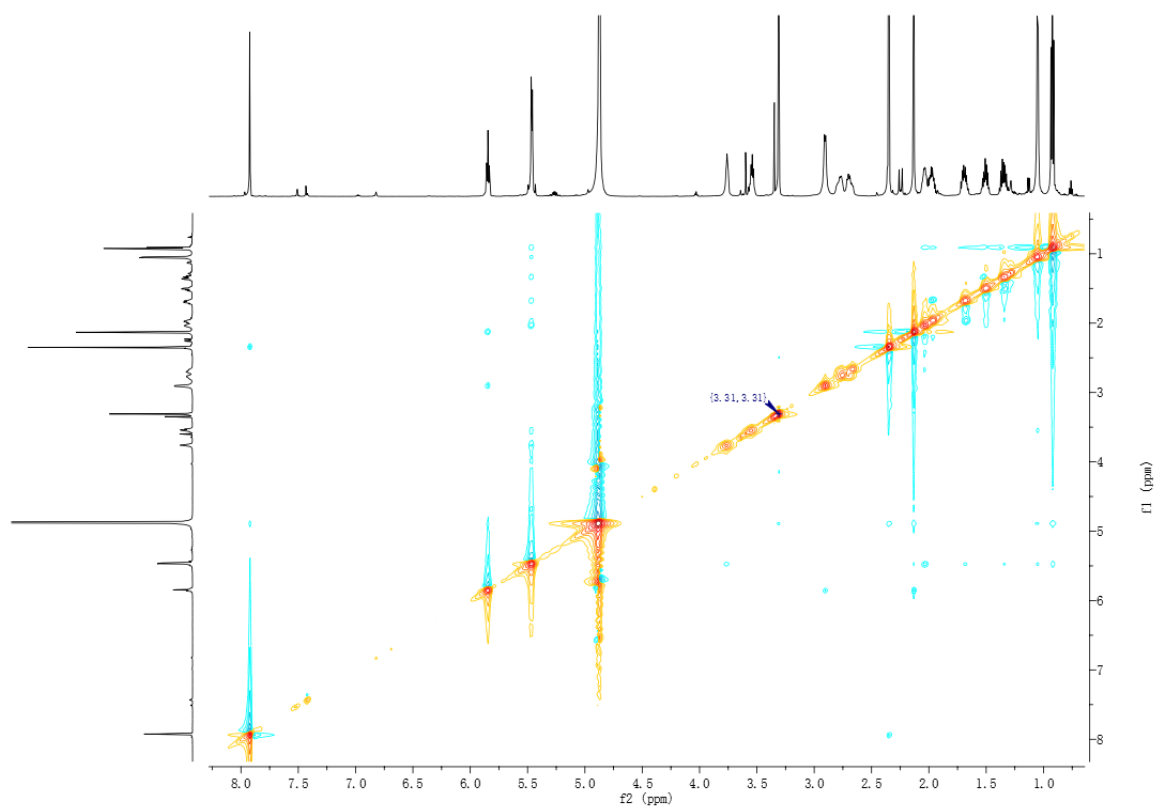

Figure S<sub>158</sub>. HRESIMS spectrum of hygrocin T (**17**)

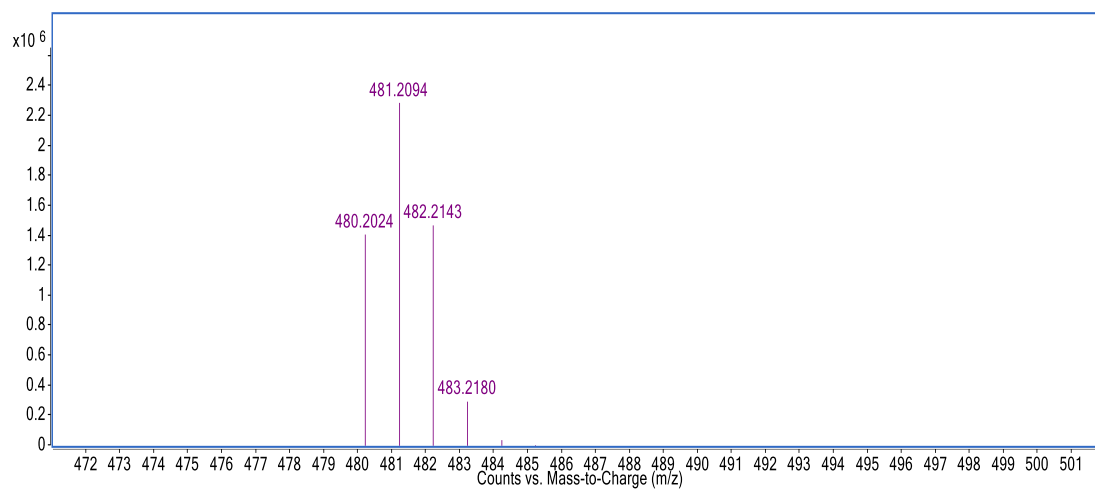

Figure S<sub>159</sub>. UV spectrum of hygrocin T (17)

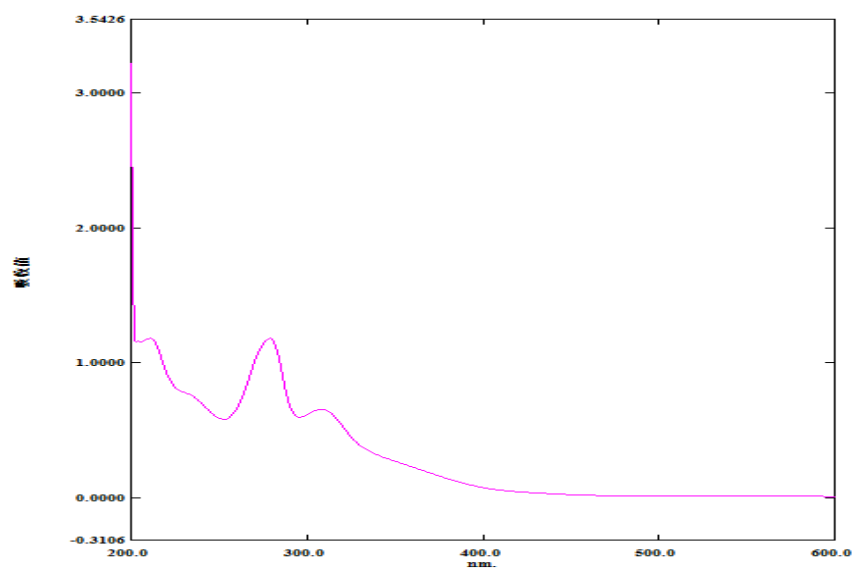

Figure S<sub>160</sub>. IR spectrum of hygrocin T (17)

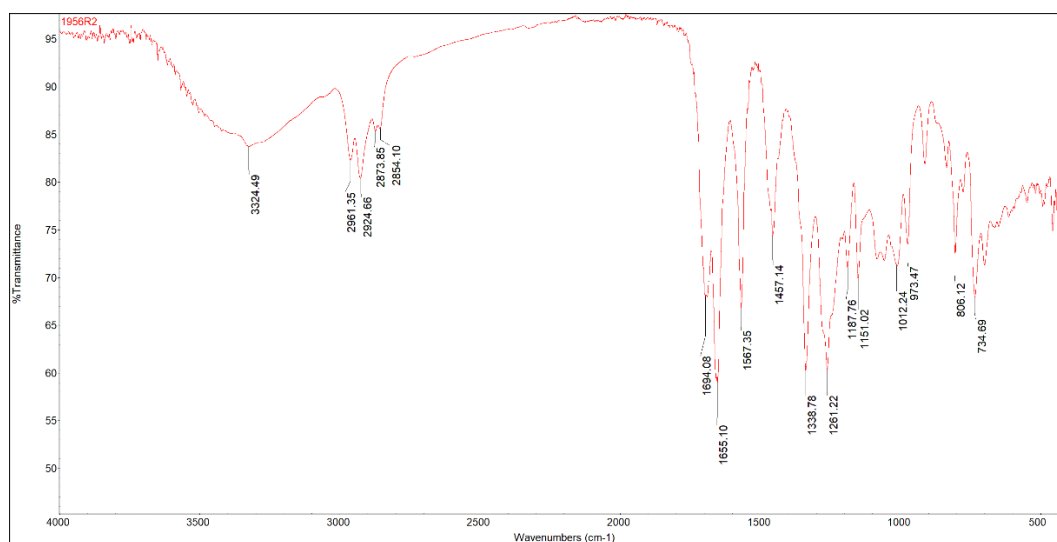

Figure S161.  $^1\text{H}$  NMR spectrum of hygrocin U (**18**)

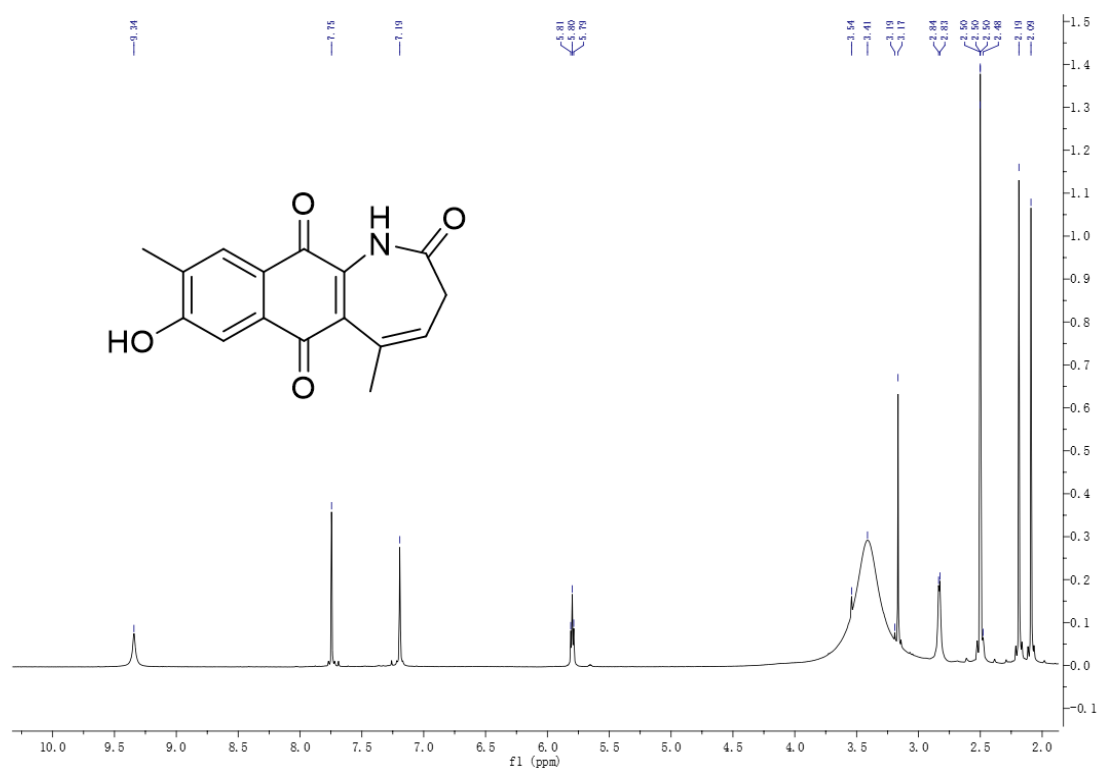

Figure S162.  $^{13}\text{C}$  NMR spectrum of hygrocin U (**18**)

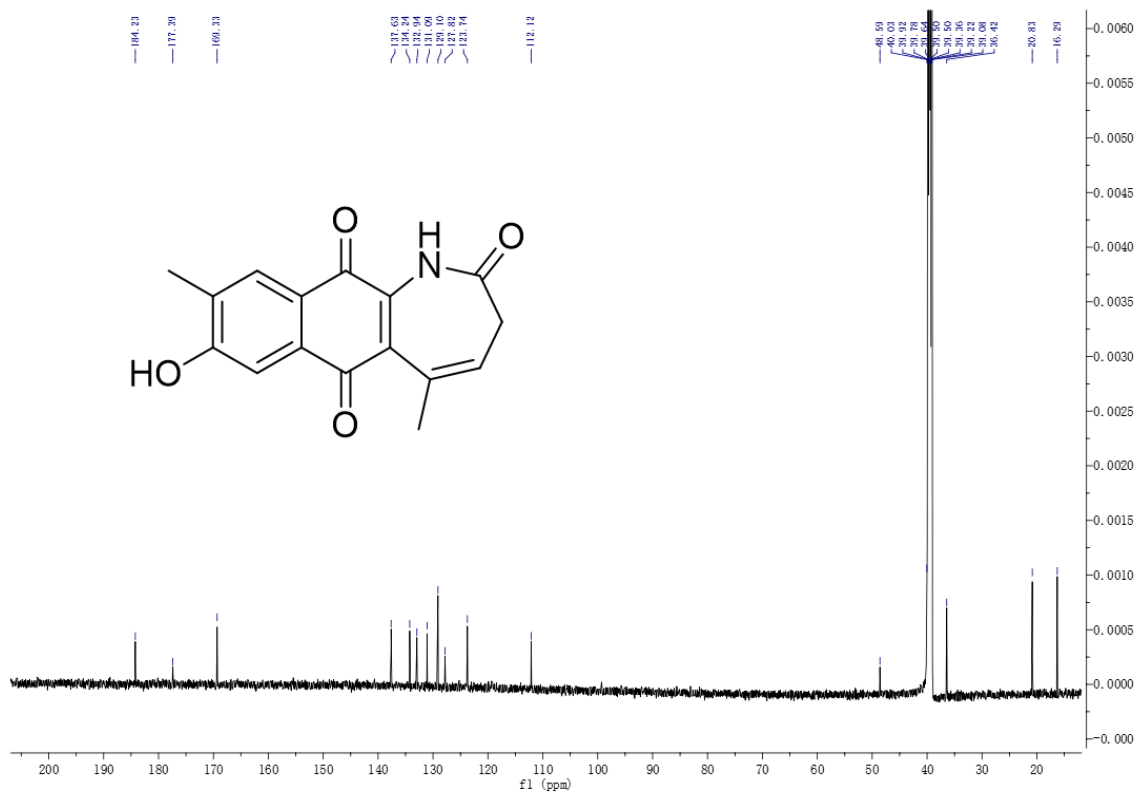

Figure S163. HMQC spectrum of hygrocin U (**18**)

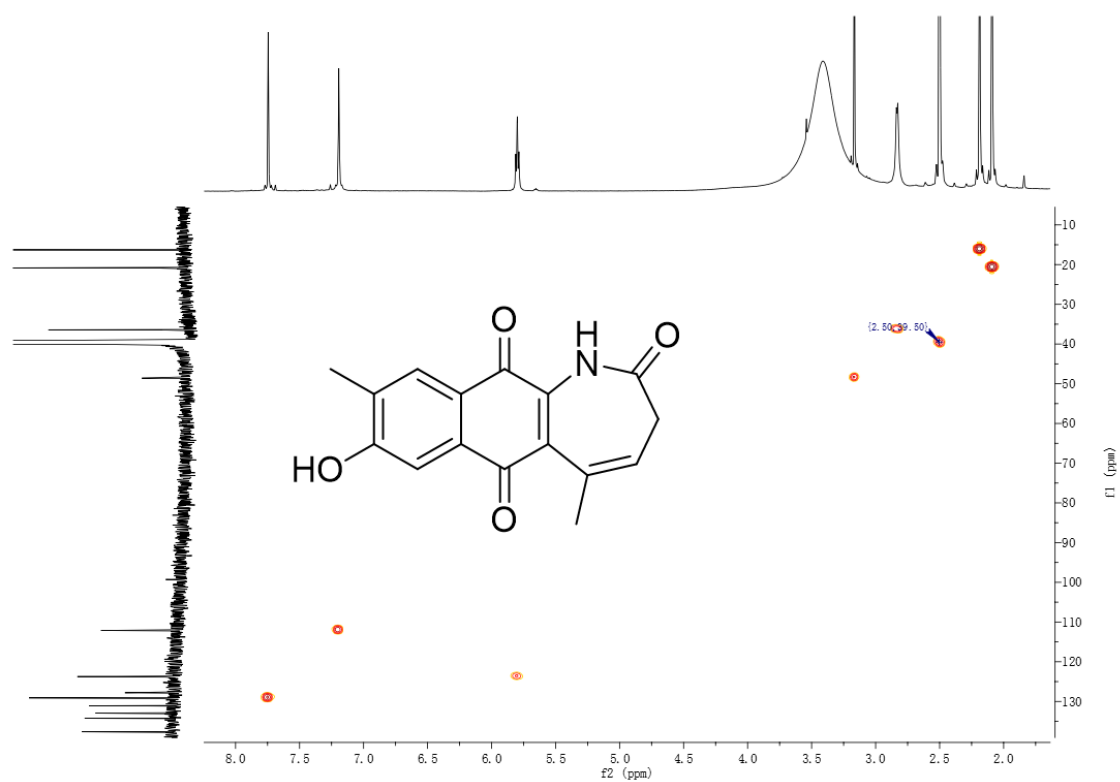

Figure S164. COSY spectrum of hygrocin U (**18**)

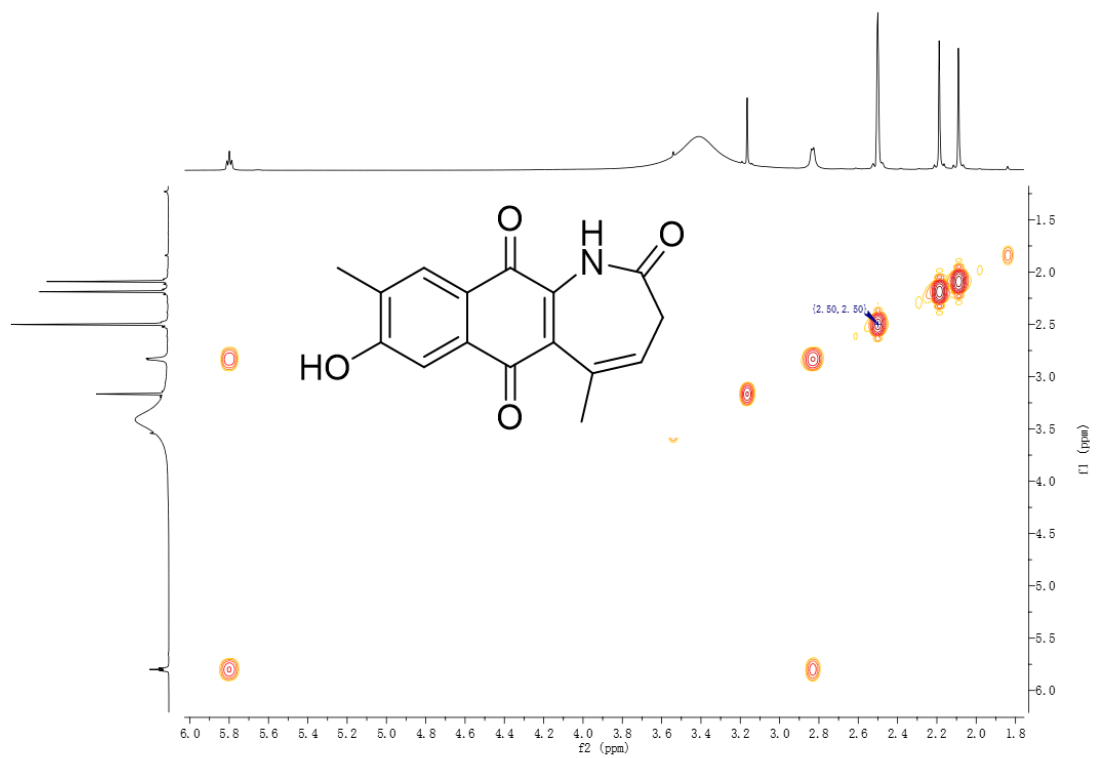

Figure S165. HMBC spectrum of hygrocinn U (**18**)

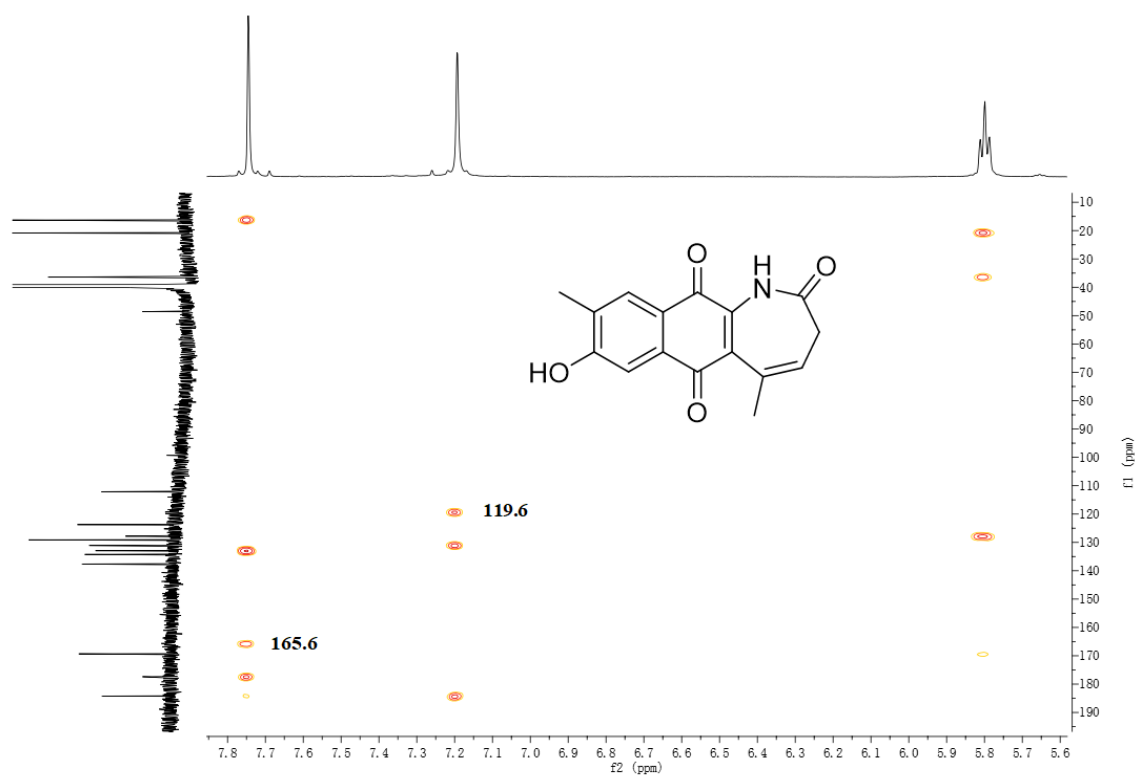

Figure S166. HMBC spectrum of hygrocinn U (**18**)

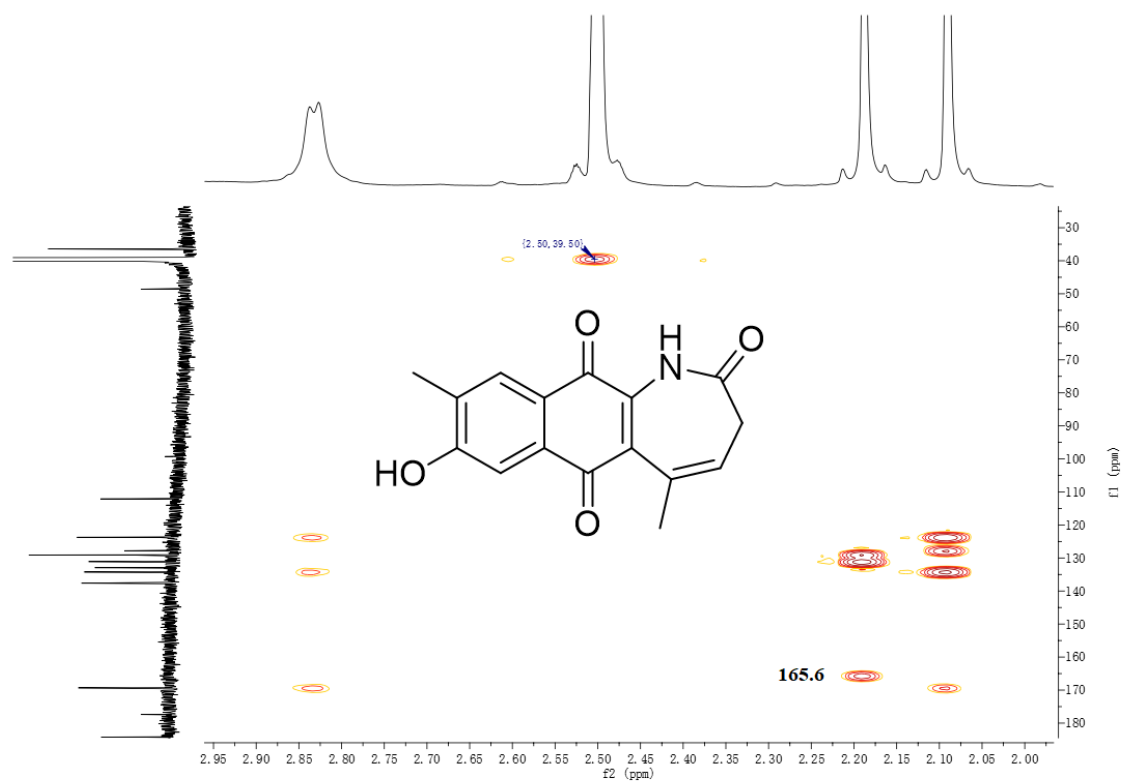

Figure S<sub>167</sub>. HRESIMS spectrum of hygrocin U (**18**)

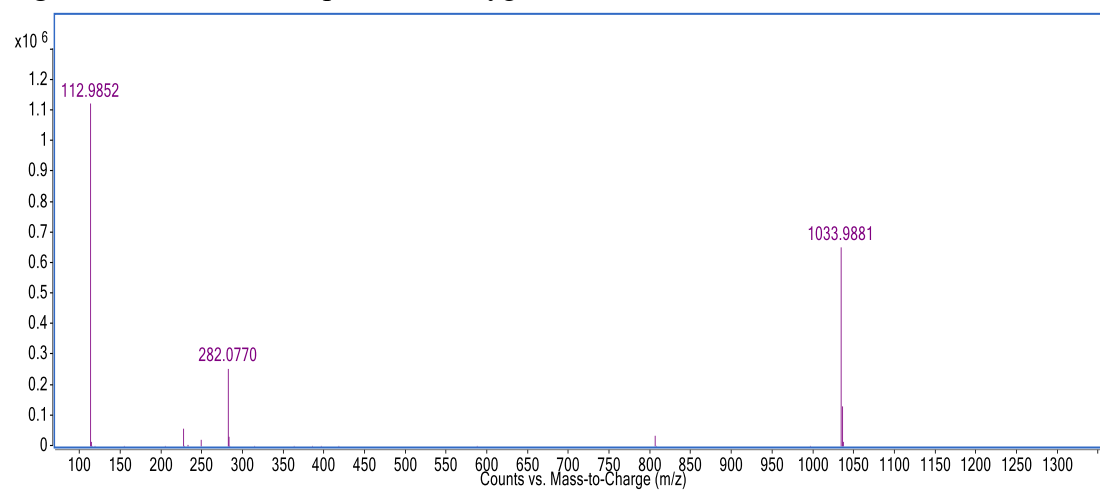

Figure S<sub>168</sub>. UV spectrum of hygrocin U (**18**)

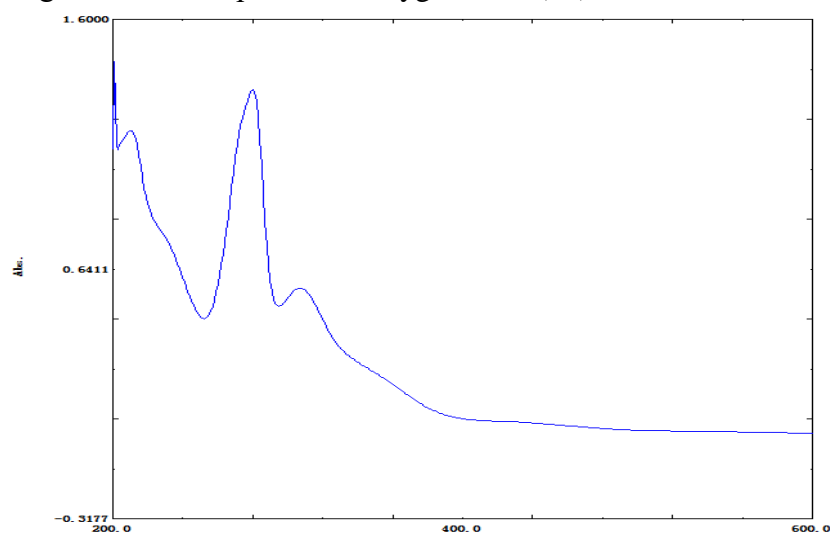

Figure S<sub>169</sub>. IR spectrum of hygrocin U (**18**)

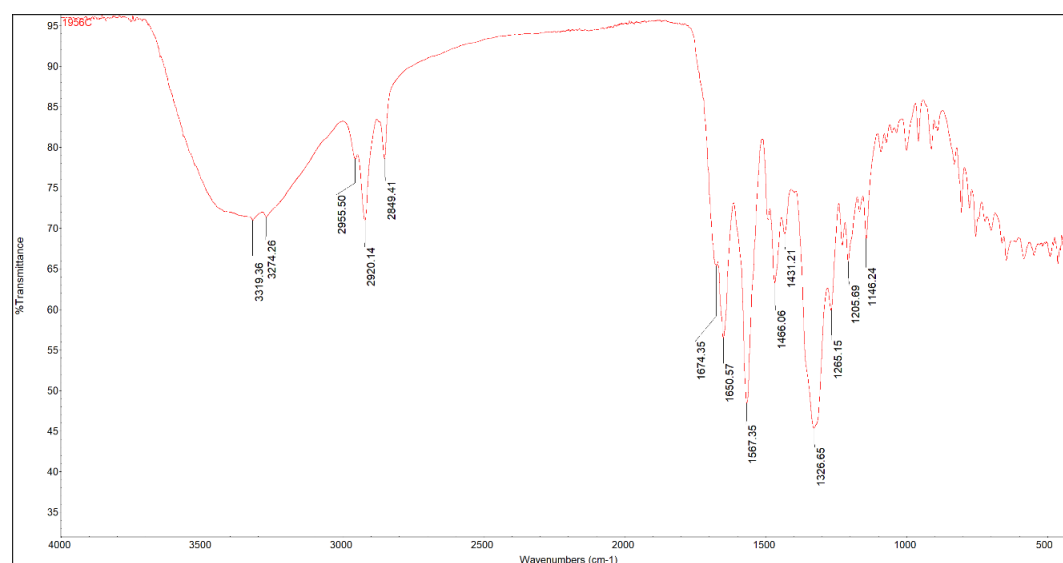

Figure S170.  $^1\text{H}$  NMR spectrum of streptobenzenepropanamide A (**23**)

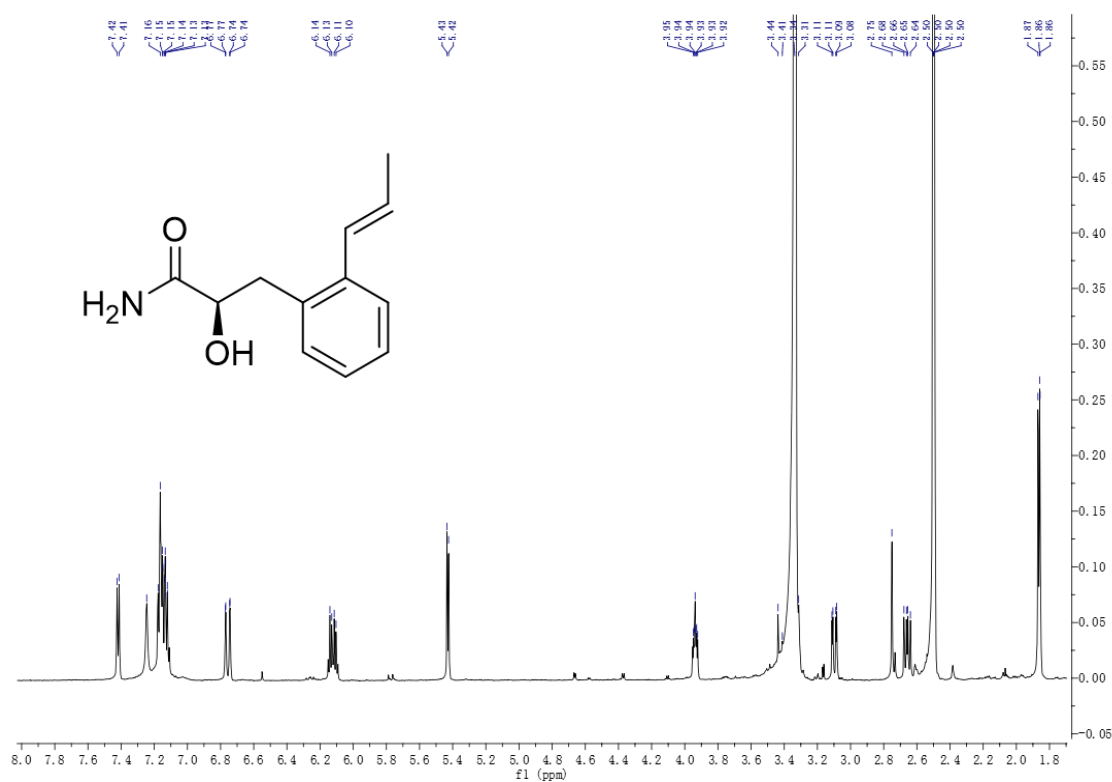

Figure S171.  $^1\text{H}$  NMR spectrum of streptobenzenepropanamide A (**23**)

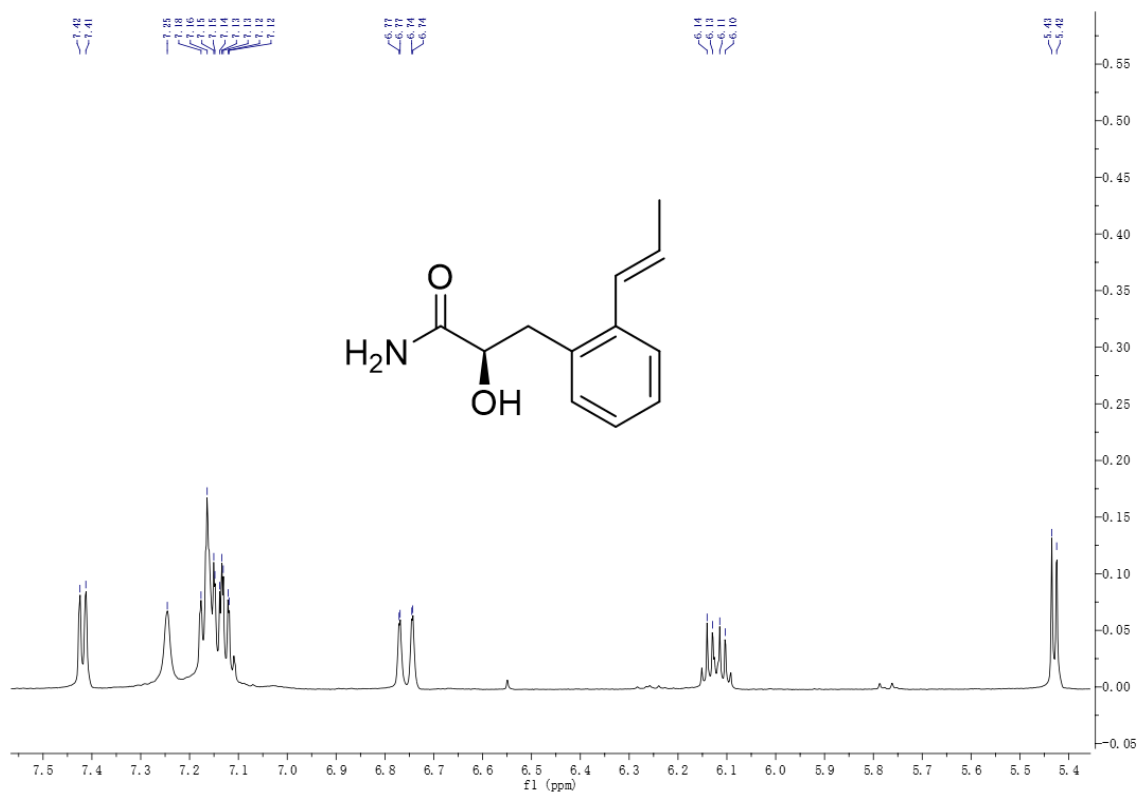

[illegible]

Chemical structure: C=CC1=CC=C(C=C1)C[C@H](O)C(=O)N

<sup>1</sup>H NMR spectrum (400 MHz, DMSO-d<sub>6</sub>) showing peaks and integration values:

| Chemical Shift (ppm)   | Integration                    |
|------------------------|--------------------------------|
| 6.12, 6.18, 6.62, 6.68 | 0.0028, 0.0026, 0.0022, 0.0020 |
| 7.12, 7.18, 7.22, 7.28 | 0.0018, 0.0016, 0.0014, 0.0012 |
| 7.92                   | 0.0008                         |
| 4.32                   | 0.0006                         |
| 3.72                   | 0.0004                         |
| 1.82                   | 0.0002                         |



Figure S174.  $^{13}\text{C}$  NMR spectrum of streptobenzenepropanamide A (**23**)

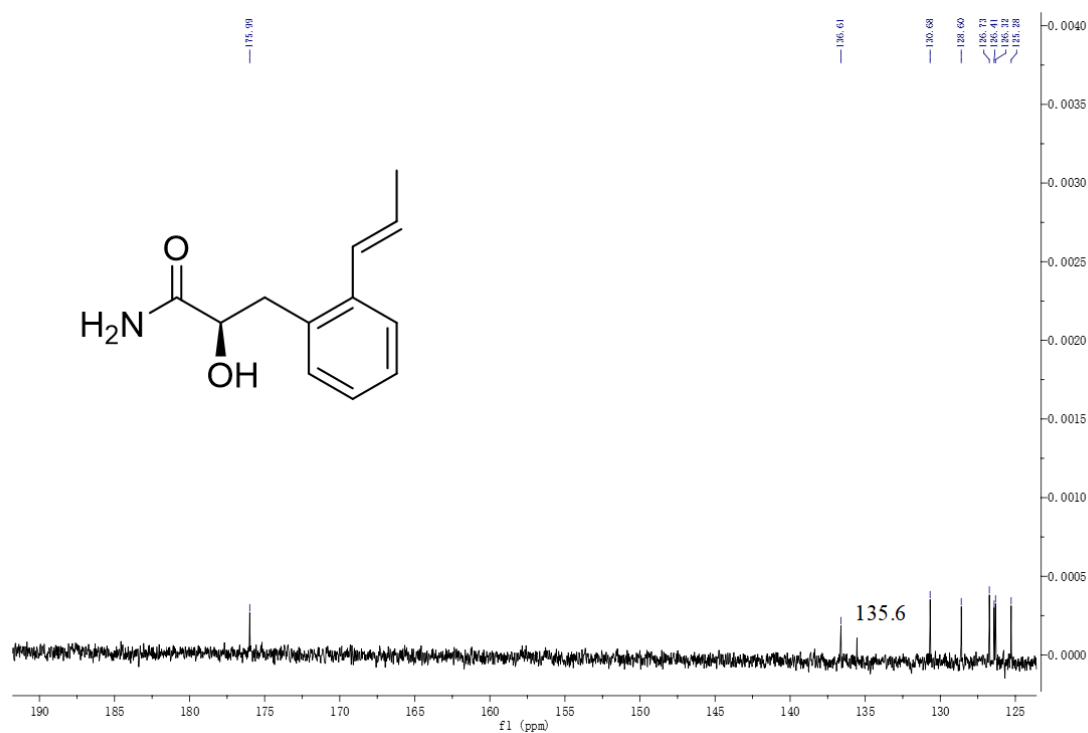

Figure S175. HMQC spectrum of streptobenzenepropanamide A (**23**)

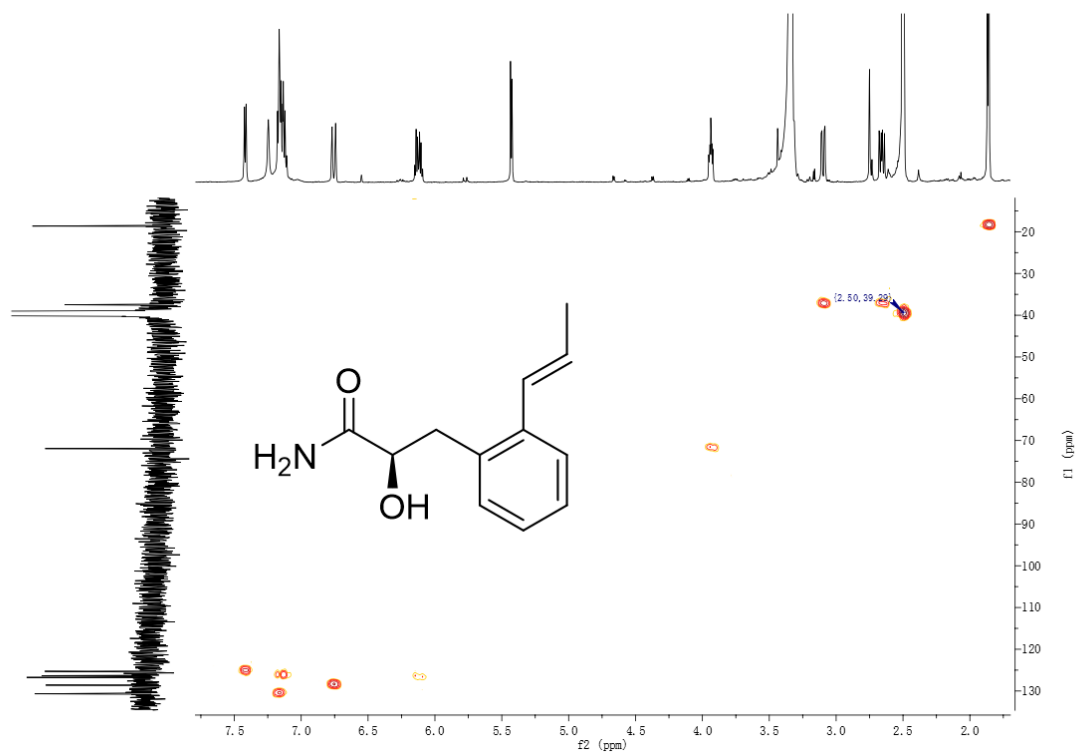

Figure S176. HMQC spectrum of streptobenzenepropanamide A (**23**)

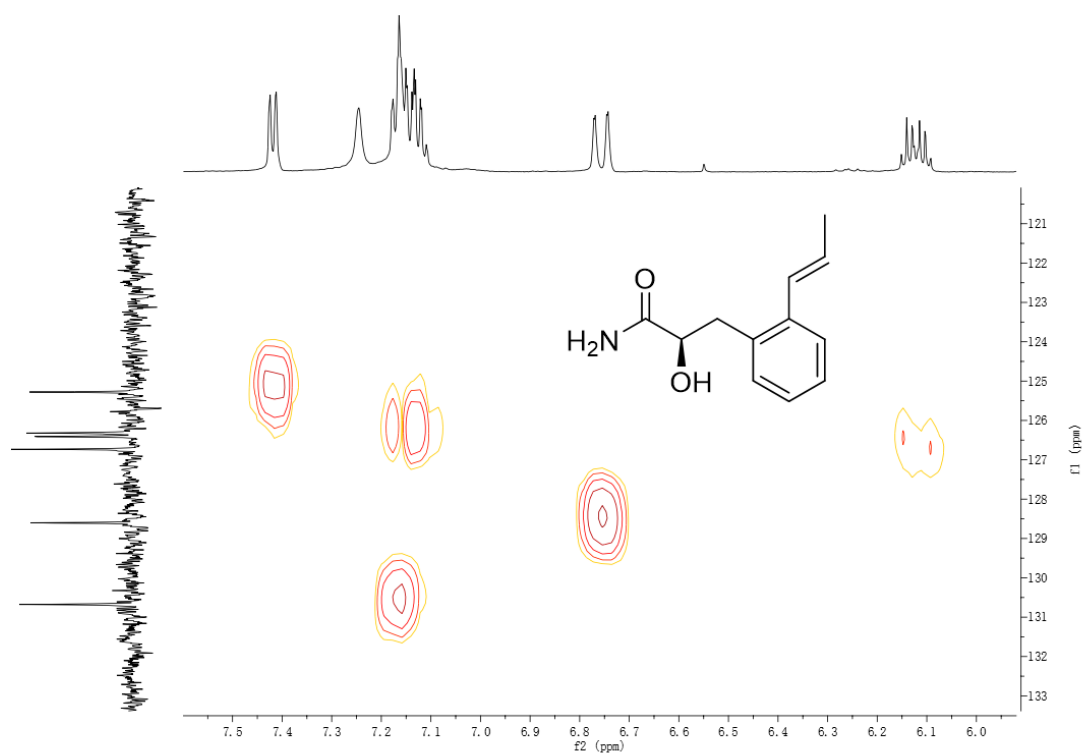

Figure S177. COSY spectrum of streptobenzenepropanamide A (**23**)

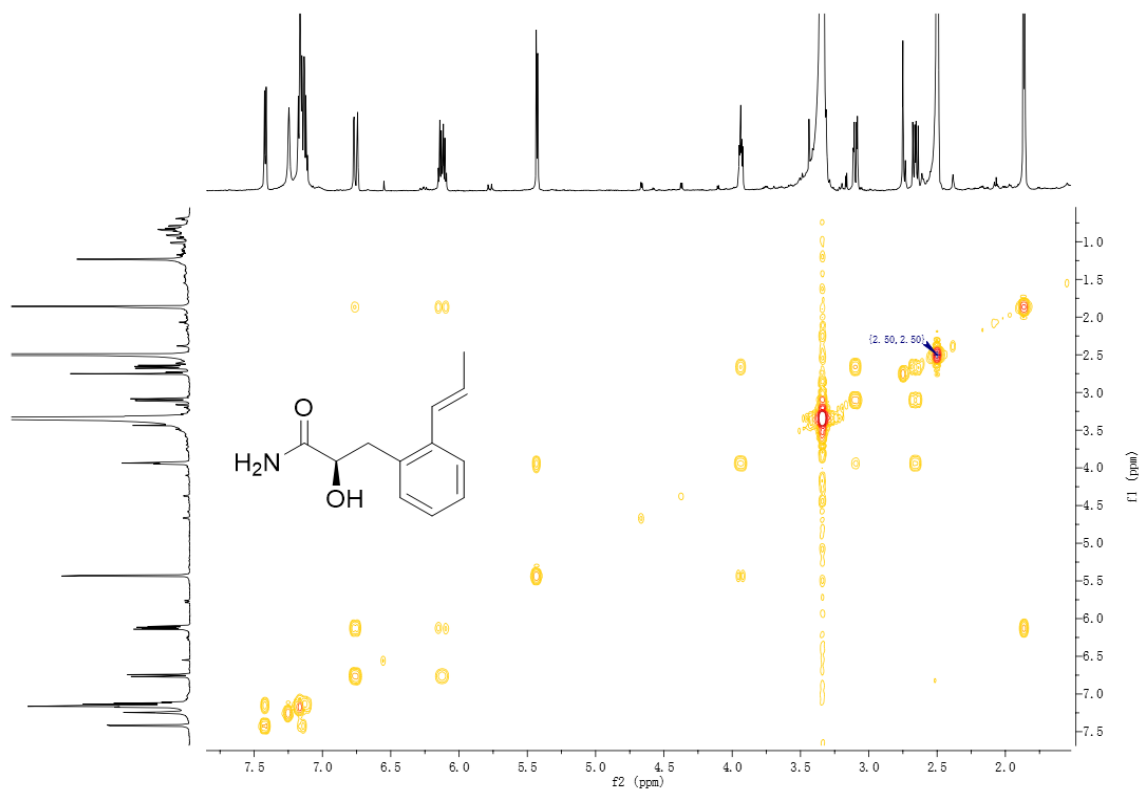

Figure S<sub>178</sub>. HMBC spectrum of streptobenzenepropanamide A (**23**)

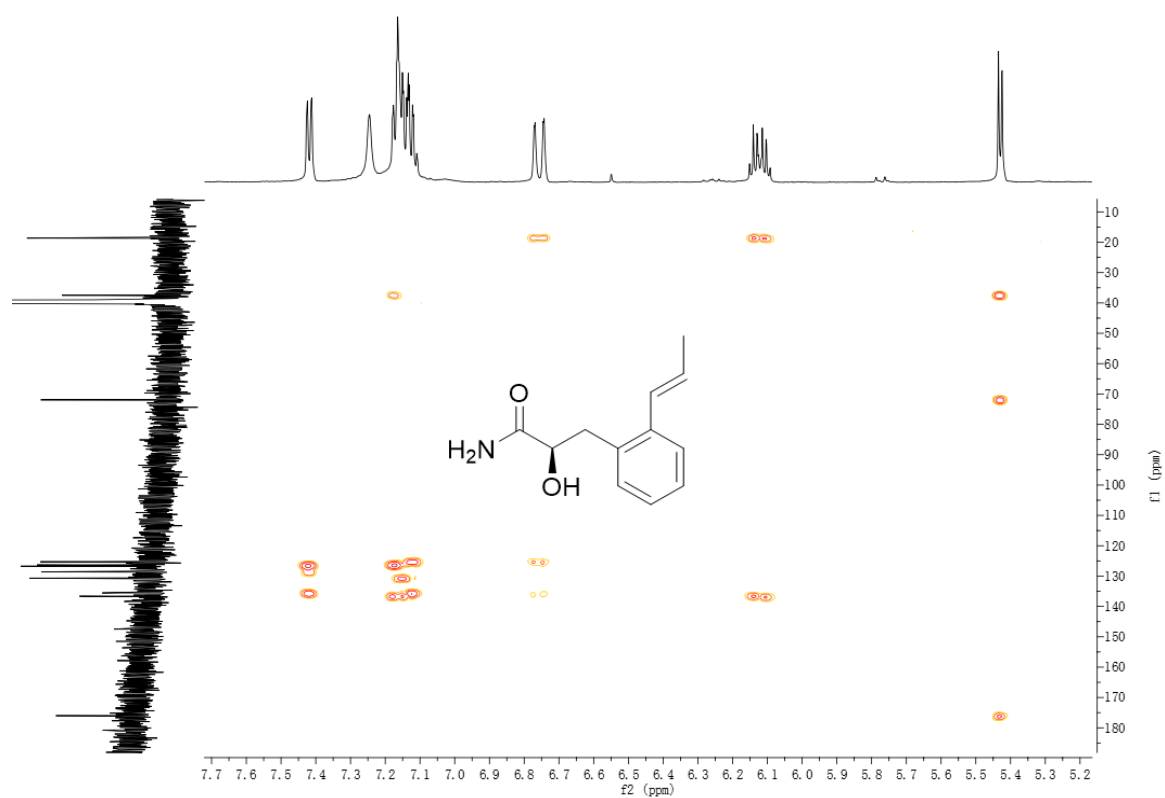

Figure S<sub>179</sub>. HMBC spectrum of streptobenzenepropanamide A (**23**)

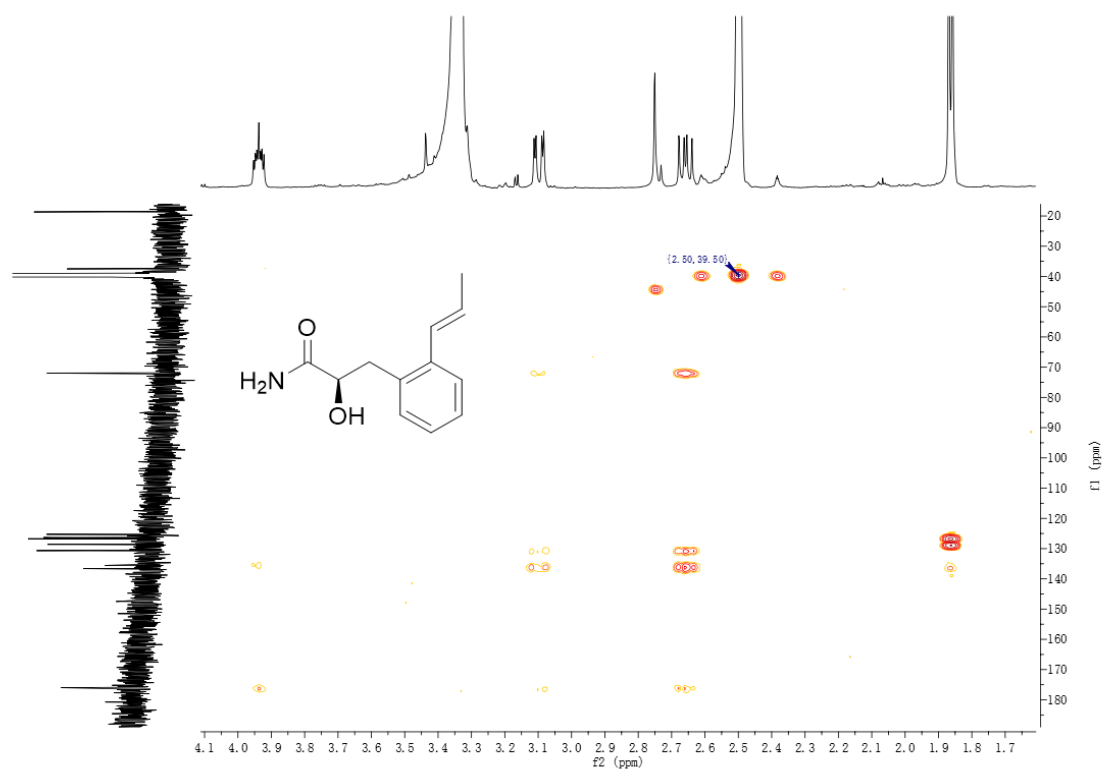

Figure S<sub>180</sub>. HRESIMS spectrum of streptobenzenepropanamide A (**23**)

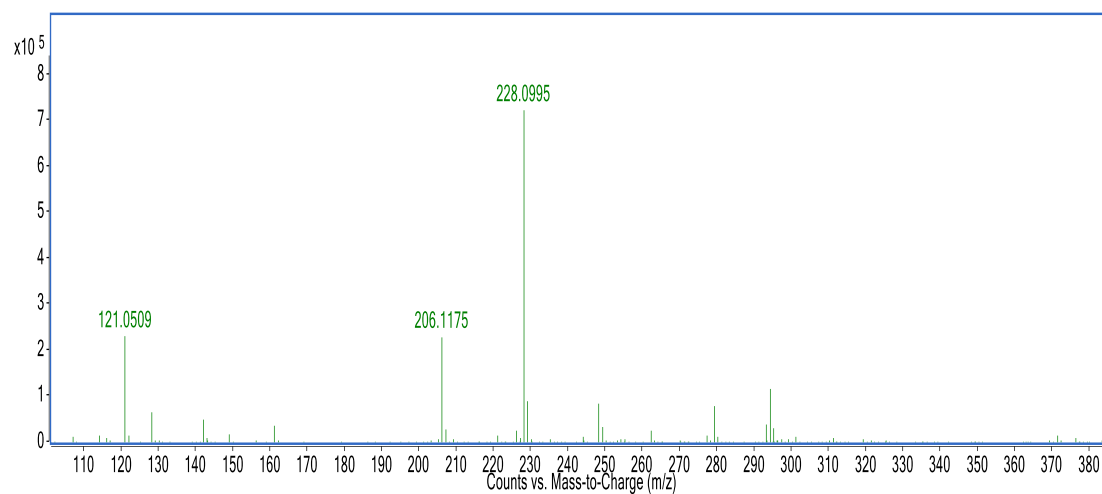

Figure S<sub>181</sub>. UV spectrum of streptobenzenepropanamide A (**23**)

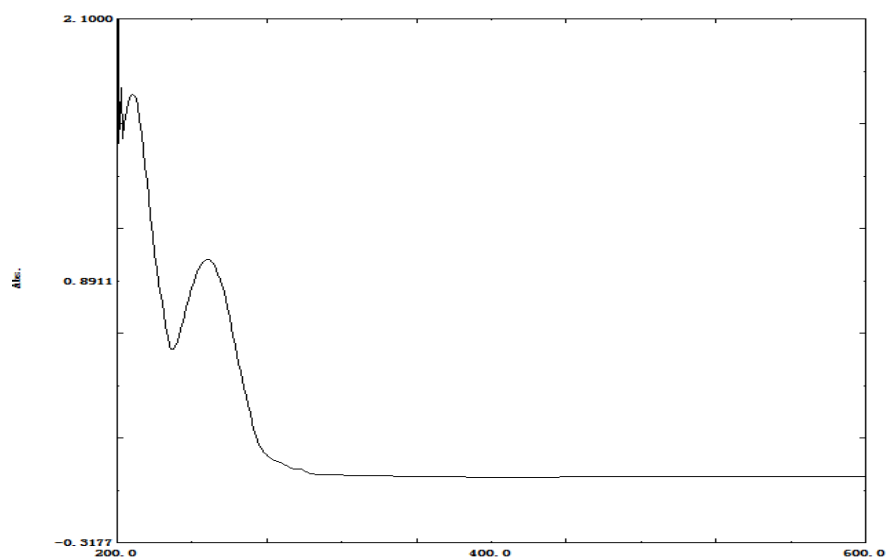

Figure S<sub>182</sub>. IR spectrum of streptobenzenepropanamide A (**23**)

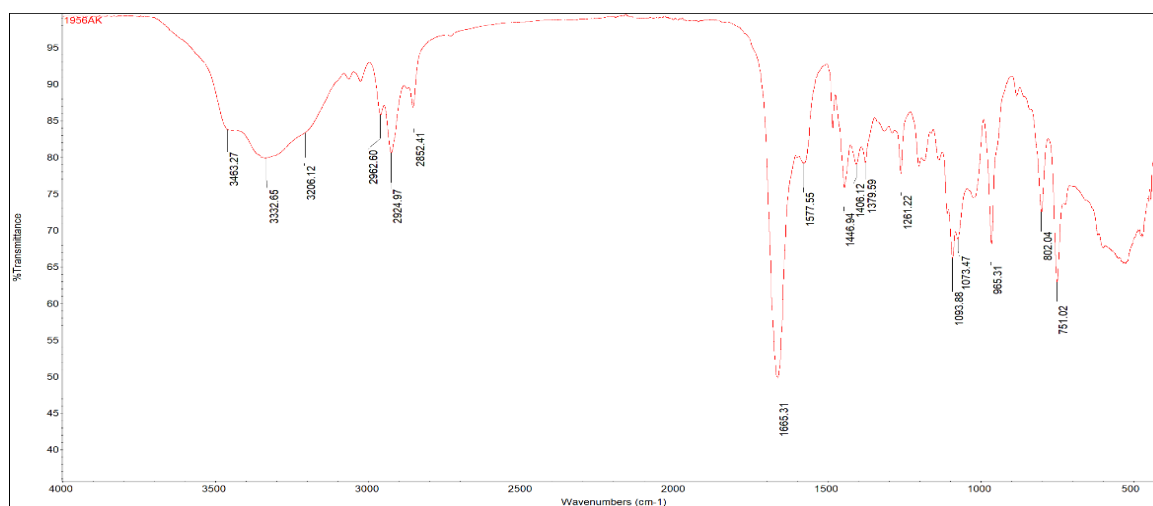

Table S16. Gibbs free energies<sup>a</sup> and equilibrium populations<sup>b</sup> of low-energy conformers of *R-23*

| Conformers   | In MeOH      |              |
|--------------|--------------|--------------|
|              | G            | <i>P</i> (%) |
| <i>R-23a</i> | -671.5804428 | 6.39%        |
| <i>R-23b</i> | -671.5795918 | 2.59%        |
| <i>R-23c</i> | -671.5812962 | 15.79%       |
| <i>R-23d</i> | -671.5811699 | 13.81%       |
| <i>R-23e</i> | -671.5825771 | 61.41%       |

<sup>a</sup> B3LYP/6-31+G (d, p), in kcal/mol; <sup>b</sup> from G values at 298.15K.Table S17. Cartesian coordinates for the low-energy reoptimized MMFF conformers of *R-23* at B3LYP/6-311+G (d, p) level of theory in MeOH

| <i>R-23a</i> |      |      | Standard Orientation (Ångstroms) |           |           |
|--------------|------|------|----------------------------------|-----------|-----------|
| No.          | Atom | Type | X                                | Y         | Z         |
| 1            | 6    | 0    | -0.853748                        | 2.529083  | -1.753232 |
| 2            | 6    | 0    | -1.040582                        | 2.125552  | -0.432146 |
| 3            | 6    | 0    | -0.189754                        | 1.182883  | 0.178676  |
| 4            | 6    | 0    | 0.886634                         | 0.646475  | -0.573921 |
| 5            | 6    | 0    | 1.067772                         | 1.076781  | -1.898355 |
| 6            | 6    | 0    | 0.210105                         | 2.003886  | -2.492371 |
| 7            | 6    | 0    | 1.836975                         | -0.397263 | -0.011901 |
| 8            | 6    | 0    | 1.365438                         | -1.866862 | -0.131892 |
| 9            | 6    | 0    | 1.238977                         | -2.300149 | -1.603338 |
| 10           | 8    | 0    | 0.171111                         | -2.162813 | 0.594842  |
| 11           | 7    | 0    | 0.024178                         | -2.735604 | -1.983740 |
| 12           | 8    | 0    | 2.221427                         | -2.250308 | -2.355706 |
| 13           | 6    | 0    | -0.422838                        | 0.785584  | 1.587119  |
| 14           | 6    | 0    | -1.629740                        | 0.621342  | 2.159816  |
| 15           | 6    | 0    | -1.853804                        | 0.270912  | 3.600819  |
| 16           | 1    | 0    | -1.521882                        | 3.262523  | -2.195233 |
| 17           | 1    | 0    | -1.843859                        | 2.563237  | 0.152697  |
| 18           | 1    | 0    | 1.896153                         | 0.670026  | -2.471506 |
| 19           | 1    | 0    | 0.377879                         | 2.320178  | -3.517680 |
| 20           | 1    | 0    | 2.790733                         | -0.335955 | -0.542648 |
| 21           | 1    | 0    | 2.054658                         | -0.211729 | 1.044114  |
| 22           | 1    | 0    | 2.160379                         | -2.496741 | 0.286320  |
| 23           | 1    | 0    | -0.262460                        | -1.344958 | 0.888674  |
| 24           | 1    | 0    | -0.120361                        | -3.074013 | -2.924529 |
| 25           | 1    | 0    | -0.717883                        | -2.801405 | -1.301040 |
| 26           | 1    | 0    | 0.459802                         | 0.628310  | 2.207100  |
| 27           | 1    | 0    | -2.525470                        | 0.743125  | 1.550087  |
| 28           | 1    | 0    | -2.437339                        | -0.653409 | 3.694230  |
| 29           | 1    | 0    | -0.909850                        | 0.142096  | 4.138928  |
| 30           | 1    | 0    | -2.432653                        | 1.056215  | 4.103816  |

| <b>R-23b</b> |      |      | Standard Orientation (Ångstroms) |           |           |
|--------------|------|------|----------------------------------|-----------|-----------|
| No.          | Atom | Type | X                                | Y         | Z         |
| 1            | 6    | 0    | -0.909671                        | 2.728589  | -1.196484 |
| 2            | 6    | 0    | -0.992300                        | 2.167214  | 0.075062  |
| 3            | 6    | 0    | -0.245256                        | 1.024310  | 0.433487  |
| 4            | 6    | 0    | 0.589847                         | 0.429005  | -0.548893 |
| 5            | 6    | 0    | 0.660916                         | 1.011306  | -1.826620 |
| 6            | 6    | 0    | -0.074304                        | 2.149086  | -2.157257 |
| 7            | 6    | 0    | 1.431096                         | -0.804808 | -0.264832 |
| 8            | 6    | 0    | 0.796441                         | -2.131273 | -0.745960 |
| 9            | 6    | 0    | 0.915922                         | -2.320446 | -2.272547 |
| 10           | 8    | 0    | -0.540965                        | -2.316992 | -0.281401 |
| 11           | 7    | 0    | -0.203186                        | -2.728153 | -2.900988 |
| 12           | 8    | 0    | 1.996482                         | -2.137991 | -2.847836 |
| 13           | 6    | 0    | -0.340641                        | 0.480976  | 1.807744  |
| 14           | 6    | 0    | -0.586863                        | 1.201505  | 2.915767  |
| 15           | 6    | 0    | -0.706037                        | 0.629507  | 4.297954  |
| 16           | 1    | 0    | -1.500460                        | 3.607077  | -1.439520 |
| 17           | 1    | 0    | -1.661802                        | 2.607938  | 0.807146  |
| 18           | 1    | 0    | 1.318175                         | 0.565288  | -2.567892 |
| 19           | 1    | 0    | 0.002373                         | 2.577011  | -3.152431 |
| 20           | 1    | 0    | 2.398431                         | -0.715169 | -0.766895 |
| 21           | 1    | 0    | 1.634351                         | -0.898261 | 0.803479  |
| 22           | 1    | 0    | 1.373135                         | -2.956690 | -0.312980 |
| 23           | 1    | 0    | -1.019123                        | -1.476664 | -0.362693 |
| 24           | 1    | 0    | -0.176956                        | -2.934540 | -3.889702 |
| 25           | 1    | 0    | -1.041144                        | -2.921410 | -2.371155 |
| 26           | 1    | 0    | -0.193049                        | -0.590400 | 1.925989  |
| 27           | 1    | 0    | -0.703548                        | 2.282460  | 2.836096  |
| 28           | 1    | 0    | -1.692566                        | 0.847449  | 4.727339  |
| 29           | 1    | 0    | -0.562657                        | -0.455442 | 4.301616  |
| 30           | 1    | 0    | 0.032359                         | 1.078519  | 4.974406  |
| <b>R-23c</b> |      |      | Standard Orientation (Ångstroms) |           |           |
| No.          | Atom | Type | X                                | Y         | Z         |
| 1            | 6    | 0    | -0.971924                        | 2.364810  | -2.023652 |
| 2            | 6    | 0    | -1.174026                        | 2.046663  | -0.681901 |
| 3            | 6    | 0    | -0.928832                        | 0.751513  | -0.181728 |
| 4            | 6    | 0    | -0.478544                        | -0.248196 | -1.084897 |
| 5            | 6    | 0    | -0.293159                        | 0.088163  | -2.435271 |
| 6            | 6    | 0    | -0.531450                        | 1.378418  | -2.911093 |
| 7            | 6    | 0    | -0.187242                        | -1.667321 | -0.636996 |
| 8            | 6    | 0    | 1.083925                         | -1.864512 | 0.236168  |
| 9            | 6    | 0    | 2.384738                         | -1.691100 | -0.566389 |
| 10           | 8    | 0    | 1.082728                         | -3.173436 | 0.786436  |

|    |   |   |           |           |           |
|----|---|---|-----------|-----------|-----------|
| 11 | 7 | 0 | 2.769072  | -0.438945 | -0.867265 |
| 12 | 8 | 0 | 3.027842  | -2.698103 | -0.898849 |
| 13 | 6 | 0 | -1.168049 | 0.442005  | 1.243613  |
| 14 | 6 | 0 | -1.095670 | 1.312748  | 2.265623  |
| 15 | 6 | 0 | -1.380635 | 0.972143  | 3.698884  |
| 16 | 1 | 0 | -1.175416 | 3.371443  | -2.377330 |
| 17 | 1 | 0 | -1.555280 | 2.807961  | -0.008306 |
| 18 | 1 | 0 | 0.047545  | -0.680216 | -3.124553 |
| 19 | 1 | 0 | -0.383006 | 1.607492  | -3.962180 |
| 20 | 1 | 0 | -1.013579 | -2.061150 | -0.035562 |
| 21 | 1 | 0 | -0.102828 | -2.319683 | -1.512526 |
| 22 | 1 | 0 | 1.072962  | -1.145600 | 1.063038  |
| 23 | 1 | 0 | 1.766302  | -3.664948 | 0.291723  |
| 24 | 1 | 0 | 3.586429  | -0.293616 | -1.444728 |
| 25 | 1 | 0 | 2.207372  | 0.364276  | -0.624495 |
| 26 | 1 | 0 | -1.425138 | -0.589895 | 1.478968  |
| 27 | 1 | 0 | -0.802052 | 2.344225  | 2.070449  |
| 28 | 1 | 0 | -2.202241 | 1.585822  | 4.090645  |
| 29 | 1 | 0 | -1.652491 | -0.081146 | 3.818830  |
| 30 | 1 | 0 | -0.509352 | 1.179187  | 4.333343  |

| <b>R-23d</b> |      |      | Standard Orientation (Ångstroms) |           |           |
|--------------|------|------|----------------------------------|-----------|-----------|
| No.          | Atom | Type | X                                | Y         | Z         |
| 1            | 6    | 0    | -1.240479                        | 2.015607  | -2.695325 |
| 2            | 6    | 0    | -1.004917                        | 2.195565  | -1.332855 |
| 3            | 6    | 0    | -0.236439                        | 1.280643  | -0.585994 |
| 4            | 6    | 0    | 0.321860                         | 0.161131  | -1.256967 |
| 5            | 6    | 0    | 0.088036                         | 0.004706  | -2.631184 |
| 6            | 6    | 0    | -0.688301                        | 0.913511  | -3.353476 |
| 7            | 6    | 0    | 1.149014                         | -0.883869 | -0.533879 |
| 8            | 6    | 0    | 0.324016                         | -1.830528 | 0.362323  |
| 9            | 6    | 0    | 1.252393                         | -2.746739 | 1.181488  |
| 10           | 8    | 0    | -0.662635                        | -2.569448 | -0.360138 |
| 11           | 7    | 0    | 0.977969                         | -4.063645 | 1.120085  |
| 12           | 8    | 0    | 2.171261                         | -2.267350 | 1.858753  |
| 13           | 6    | 0    | -0.000481                        | 1.503324  | 0.855940  |
| 14           | 6    | 0    | -0.822270                        | 2.151283  | 1.700206  |
| 15           | 6    | 0    | -0.536156                        | 2.393354  | 3.153226  |
| 16           | 1    | 0    | -1.834559                        | 2.742113  | -3.242238 |
| 17           | 1    | 0    | -1.402718                        | 3.076203  | -0.837800 |
| 18           | 1    | 0    | 0.527563                         | -0.846228 | -3.145939 |
| 19           | 1    | 0    | -0.849681                        | 0.767154  | -4.417385 |
| 20           | 1    | 0    | 1.688554                         | -1.490522 | -1.272097 |
| 21           | 1    | 0    | 1.912724                         | -0.423596 | 0.099216  |
| 22           | 1    | 0    | -0.232618                        | -1.238668 | 1.097456  |

|    |   |   |           |           |           |
|----|---|---|-----------|-----------|-----------|
| 23 | 1 | 0 | -0.339338 | -2.757587 | -1.253222 |
| 24 | 1 | 0 | 1.519196  | -4.716560 | 1.669162  |
| 25 | 1 | 0 | 0.178967  | -4.389653 | 0.595018  |
| 26 | 1 | 0 | 0.925355  | 1.100443  | 1.264285  |
| 27 | 1 | 0 | -1.776018 | 2.530414  | 1.332740  |
| 28 | 1 | 0 | -1.317359 | 1.954419  | 3.786953  |
| 29 | 1 | 0 | 0.428308  | 1.971191  | 3.452041  |
| 30 | 1 | 0 | -0.524246 | 3.468335  | 3.375607  |

  

| <i>R-23e</i> |      |      | Standard Orientation (Ångstroms) |           |           |
|--------------|------|------|----------------------------------|-----------|-----------|
| No.          | Atom | Type | X                                | Y         | Z         |
| 1            | 6    | 0    | -1.238054                        | 1.919406  | -2.688575 |
| 2            | 6    | 0    | -0.996845                        | 2.146553  | -1.334019 |
| 3            | 6    | 0    | -0.218745                        | 1.262864  | -0.560354 |
| 4            | 6    | 0    | 0.350713                         | 0.128828  | -1.199309 |
| 5            | 6    | 0    | 0.105930                         | -0.078246 | -2.566372 |
| 6            | 6    | 0    | -0.683347                        | 0.799656  | -3.313211 |
| 7            | 6    | 0    | 1.182268                         | -0.893153 | -0.448021 |
| 8            | 6    | 0    | 0.324547                         | -1.856000 | 0.407839  |
| 9            | 6    | 0    | 1.230203                         | -2.824364 | 1.172890  |
| 10           | 8    | 0    | -0.593758                        | -2.611107 | -0.383635 |
| 11           | 7    | 0    | 1.136726                         | -4.122609 | 0.829096  |
| 12           | 8    | 0    | 2.001994                         | -2.395857 | 2.040866  |
| 13           | 6    | 0    | 0.013695                         | 1.530639  | 0.874186  |
| 14           | 6    | 0    | -0.816424                        | 2.196134  | 1.696480  |
| 15           | 6    | 0    | -0.537301                        | 2.482384  | 3.142699  |
| 16           | 1    | 0    | -1.840684                        | 2.623068  | -3.255569 |
| 17           | 1    | 0    | -1.399982                        | 3.039667  | -0.866629 |
| 18           | 1    | 0    | 0.550080                         | -0.942710 | -3.053403 |
| 19           | 1    | 0    | -0.851337                        | 0.616000  | -4.370195 |
| 20           | 1    | 0    | 1.752301                         | -1.492117 | -1.166325 |
| 21           | 1    | 0    | 1.906052                         | -0.414239 | 0.217391  |
| 22           | 1    | 0    | -0.220896                        | -1.279282 | 1.166032  |
| 23           | 1    | 0    | -1.080478                        | -2.004351 | -0.960700 |
| 24           | 1    | 0    | 1.706872                         | -4.809612 | 1.302006  |
| 25           | 1    | 0    | 0.471054                         | -4.417167 | 0.128631  |
| 26           | 1    | 0    | 0.940806                         | 1.146814  | 1.296973  |
| 27           | 1    | 0    | -1.772325                        | 2.555871  | 1.315469  |
| 28           | 1    | 0    | -1.317130                        | 2.055181  | 3.786038  |
| 29           | 1    | 0    | 0.429599                         | 2.077349  | 3.456883  |
| 30           | 1    | 0    | -0.535533                        | 3.563400  | 3.333839  |



Table S18. Gibbs free energies<sup>a</sup> and equilibrium populations<sup>b</sup> of low-energy conformers of *S*-**23**

| Conformers            | In MeOH      |              |
|-----------------------|--------------|--------------|
|                       | G            | <i>P</i> (%) |
| <i>S</i> - <b>23a</b> | -671.5804428 | 5.13%        |
| <i>S</i> - <b>23b</b> | -671.5812962 | 12.67%       |
| <i>S</i> - <b>23c</b> | -671.5811699 | 11.08%       |
| <i>S</i> - <b>23d</b> | -671.5825771 | 49.25%       |
| <i>S</i> - <b>23e</b> | -671.5818118 | 21.88%       |

<sup>a</sup> B3LYP/6-31+G (d, p), in kcal/mol; <sup>b</sup> from G values at 298.15K.Table S19. Cartesian coordinates for the low-energy reoptimized MMFF conformers of *S*-**23** at B3LYP/6-311+G (d, p) level of theory in MeOH

| <i>S</i> - <b>23a</b> |      |      | Standard Orientation (Ångstroms) |           |           |
|-----------------------|------|------|----------------------------------|-----------|-----------|
| No.                   | Atom | Type | X                                | Y         | Z         |
| 1                     | 6    | 0    | 0.053011                         | 2.170207  | -2.342176 |
| 2                     | 6    | 0    | -0.480434                        | 2.107539  | -1.055904 |
| 3                     | 6    | 0    | -0.725616                        | 0.875156  | -0.418096 |
| 4                     | 6    | 0    | -0.429833                        | -0.324704 | -1.114927 |
| 5                     | 6    | 0    | 0.092630                         | -0.241324 | -2.415770 |
| 6                     | 6    | 0    | 0.339361                         | 0.987442  | -3.029954 |
| 7                     | 6    | 0    | -0.630739                        | -1.698825 | -0.498594 |
| 8                     | 6    | 0    | 0.540524                         | -2.222545 | 0.367654  |
| 9                     | 6    | 0    | 1.815433                         | -2.424835 | -0.470546 |
| 10                    | 8    | 0    | 0.809814                         | -1.436463 | 1.530288  |
| 11                    | 7    | 0    | 2.898203                         | -1.736286 | -0.066006 |
| 12                    | 8    | 0    | 1.809134                         | -3.193633 | -1.441440 |
| 13                    | 6    | 0    | -1.297599                        | 0.855243  | 0.948752  |
| 14                    | 6    | 0    | -1.000146                        | 1.727613  | 1.929612  |
| 15                    | 6    | 0    | -1.625411                        | 1.729894  | 3.292900  |
| 16                    | 1    | 0    | 0.225057                         | 3.134813  | -2.810831 |
| 17                    | 1    | 0    | -0.738445                        | 3.026352  | -0.538144 |
| 18                    | 1    | 0    | 0.312694                         | -1.160886 | -2.950690 |
| 19                    | 1    | 0    | 0.740733                         | 1.019898  | -4.038564 |
| 20                    | 1    | 0    | -1.531874                        | -1.730745 | 0.121014  |
| 21                    | 1    | 0    | -0.774706                        | -2.431777 | -1.296815 |
| 22                    | 1    | 0    | 0.262482                         | -3.225271 | 0.715239  |
| 23                    | 1    | 0    | 0.340974                         | -0.587122 | 1.485501  |
| 24                    | 1    | 0    | 3.780088                         | -1.853060 | -0.544691 |
| 25                    | 1    | 0    | 2.845237                         | -1.170314 | 0.769422  |
| 26                    | 1    | 0    | -2.027883                        | 0.075696  | 1.165877  |
| 27                    | 1    | 0    | -0.249286                        | 2.496200  | 1.744140  |
| 28                    | 1    | 0    | -2.347909                        | 0.916522  | 3.409648  |
| 29                    | 1    | 0    | -0.862394                        | 1.633472  | 4.075271  |
| 30                    | 1    | 0    | -2.143100                        | 2.679743  | 3.478830  |

| <b>S-23b</b> |      |      | Standard Orientation (Ångstroms) |           |           |
|--------------|------|------|----------------------------------|-----------|-----------|
| No.          | Atom | Type | X                                | Y         | Z         |
| 1            | 6    | 0    | -1.027605                        | 1.860971  | -2.472547 |
| 2            | 6    | 0    | -0.648530                        | 2.072130  | -1.148132 |
| 3            | 6    | 0    | 0.110232                         | 1.122756  | -0.433518 |
| 4            | 6    | 0    | 0.503596                         | -0.068602 | -1.099720 |
| 5            | 6    | 0    | 0.123113                         | -0.257498 | -2.437840 |
| 6            | 6    | 0    | -0.636786                        | 0.688938  | -3.126867 |
| 7            | 6    | 0    | 1.318400                         | -1.146122 | -0.410928 |
| 8            | 6    | 0    | 0.577730                         | -1.980241 | 0.672042  |
| 9            | 6    | 0    | -0.461556                        | -2.941004 | 0.069465  |
| 10           | 8    | 0    | 1.518924                         | -2.756448 | 1.398496  |
| 11           | 7    | 0    | -1.628009                        | -2.417340 | -0.344413 |
| 12           | 8    | 0    | -0.193344                        | -4.149423 | -0.007692 |
| 13           | 6    | 0    | 0.509709                         | 1.383633  | 0.965402  |
| 14           | 6    | 0    | -0.155787                        | 2.147772  | 1.849225  |
| 15           | 6    | 0    | 0.297961                         | 2.420986  | 3.253119  |
| 16           | 1    | 0    | -1.608043                        | 2.615391  | -2.995758 |
| 17           | 1    | 0    | -0.921391                        | 3.003078  | -0.660747 |
| 18           | 1    | 0    | 0.429258                         | -1.168371 | -2.945957 |
| 19           | 1    | 0    | -0.912427                        | 0.516629  | -4.163026 |
| 20           | 1    | 0    | 1.719254                         | -1.838862 | -1.158378 |
| 21           | 1    | 0    | 2.182191                         | -0.710132 | 0.102332  |
| 22           | 1    | 0    | 0.077566                         | -1.303655 | 1.373993  |
| 23           | 1    | 0    | 1.388932                         | -3.675393 | 1.094783  |
| 24           | 1    | 0    | -2.307611                        | -3.011857 | -0.799768 |
| 25           | 1    | 0    | -1.808059                        | -1.424280 | -0.312482 |
| 26           | 1    | 0    | 1.429197                         | 0.907774  | 1.303639  |
| 27           | 1    | 0    | -1.100194                        | 2.606482  | 1.556086  |
| 28           | 1    | 0    | 1.242179                         | 1.916045  | 3.479389  |
| 29           | 1    | 0    | 0.436278                         | 3.497656  | 3.416721  |
| 30           | 1    | 0    | -0.454177                        | 2.090989  | 3.981081  |
| <b>S-23c</b> |      |      | Standard Orientation (Ångstroms) |           |           |
| No.          | Atom | Type | X                                | Y         | Z         |
| 1            | 6    | 0    | -0.215979                        | 2.548439  | -2.514393 |
| 2            | 6    | 0    | -0.486450                        | 2.459116  | -1.149448 |
| 3            | 6    | 0    | -0.564304                        | 1.217039  | -0.488646 |
| 4            | 6    | 0    | -0.379176                        | 0.033547  | -1.250413 |
| 5            | 6    | 0    | -0.124081                        | 0.141781  | -2.625493 |
| 6            | 6    | 0    | -0.035689                        | 1.381704  | -3.261975 |
| 7            | 6    | 0    | -0.429631                        | -1.346335 | -0.623965 |
| 8            | 6    | 0    | 0.809176                         | -1.697991 | 0.225470  |
| 9            | 6    | 0    | 0.603211                         | -3.039000 | 0.954655  |
| 10           | 8    | 0    | 2.027440                         | -1.671174 | -0.520639 |

|    |   |   |           |           |           |
|----|---|---|-----------|-----------|-----------|
| 11 | 7 | 0 | 1.591435  | -3.942097 | 0.809353  |
| 12 | 8 | 0 | -0.409838 | -3.233317 | 1.639341  |
| 13 | 6 | 0 | -0.858310 | 1.156399  | 0.958498  |
| 14 | 6 | 0 | -0.551291 | 2.098723  | 1.867219  |
| 15 | 6 | 0 | -0.897130 | 2.023889  | 3.325477  |
| 16 | 1 | 0 | -0.166389 | 3.521999  | -2.993539 |
| 17 | 1 | 0 | -0.666521 | 3.368345  | -0.584011 |
| 18 | 1 | 0 | 0.004185  | -0.766238 | -3.209701 |
| 19 | 1 | 0 | 0.160576  | 1.433589  | -4.328820 |
| 20 | 1 | 0 | -1.306224 | -1.463197 | 0.019350  |
| 21 | 1 | 0 | -0.529554 | -2.098533 | -1.416614 |
| 22 | 1 | 0 | 0.931616  | -0.947400 | 1.014264  |
| 23 | 1 | 0 | 1.856811  | -1.948042 | -1.432654 |
| 24 | 1 | 0 | 1.542169  | -4.824972 | 1.298021  |
| 25 | 1 | 0 | 2.420797  | -3.703761 | 0.284239  |
| 26 | 1 | 0 | -1.368610 | 0.261978  | 1.313206  |
| 27 | 1 | 0 | -0.003622 | 2.987150  | 1.552347  |
| 28 | 1 | 0 | -1.429688 | 1.099252  | 3.568636  |
| 29 | 1 | 0 | 0.005452  | 2.077277  | 3.947607  |
| 30 | 1 | 0 | -1.528380 | 2.871830  | 3.621625  |

| <b>S-23d</b> |      |      | Standard Orientation (Ångstroms) |           |           |
|--------------|------|------|----------------------------------|-----------|-----------|
| No.          | Atom | Type | X                                | Y         | Z         |
| 1            | 6    | 0    | -0.059622                        | 2.410569  | -2.575152 |
| 2            | 6    | 0    | -0.315367                        | 2.414792  | -1.204321 |
| 3            | 6    | 0    | -0.489315                        | 1.220099  | -0.478131 |
| 4            | 6    | 0    | -0.426405                        | -0.012643 | -1.181671 |
| 5            | 6    | 0    | -0.178531                        | 0.002753  | -2.563689 |
| 6            | 6    | 0    | 0.009308                         | 1.196959  | -3.263709 |
| 7            | 6    | 0    | -0.576248                        | -1.352100 | -0.486140 |
| 8            | 6    | 0    | 0.695700                         | -1.774778 | 0.287641  |
| 9            | 6    | 0    | 0.455525                         | -3.107159 | 1.002019  |
| 10           | 8    | 0    | 1.830593                         | -1.908830 | -0.569067 |
| 11           | 7    | 0    | 1.185651                         | -4.152699 | 0.570572  |
| 12           | 8    | 0    | -0.382614                        | -3.180733 | 1.910194  |
| 13           | 6    | 0    | -0.754421                        | 1.259722  | 0.975067  |
| 14           | 6    | 0    | -0.344205                        | 2.217250  | 1.825369  |
| 15           | 6    | 0    | -0.658192                        | 2.248047  | 3.292290  |
| 16           | 1    | 0    | 0.066810                         | 3.350753  | -3.104166 |
| 17           | 1    | 0    | -0.405550                        | 3.363991  | -0.685172 |
| 18           | 1    | 0    | -0.139180                        | -0.942143 | -3.099778 |
| 19           | 1    | 0    | 0.194836                         | 1.177746  | -4.333464 |
| 20           | 1    | 0    | -1.409004                        | -1.348003 | 0.222729  |
| 21           | 1    | 0    | -0.792684                        | -2.123624 | -1.232840 |
| 22           | 1    | 0    | 0.904581                         | -1.036826 | 1.072983  |

|    |   |   |           |           |           |
|----|---|---|-----------|-----------|-----------|
| 23 | 1 | 0 | 1.907583  | -1.110525 | -1.112047 |
| 24 | 1 | 0 | 1.073761  | -5.057260 | 1.006387  |
| 25 | 1 | 0 | 1.872336  | -4.027416 | -0.159706 |
| 26 | 1 | 0 | -1.330302 | 0.432753  | 1.387487  |
| 27 | 1 | 0 | 0.270785  | 3.036437  | 1.452478  |
| 28 | 1 | 0 | -1.262674 | 1.387680  | 3.595659  |
| 29 | 1 | 0 | 0.261285  | 2.253660  | 3.891497  |
| 30 | 1 | 0 | -1.205441 | 3.162530  | 3.555680  |

  

| S-23e |      |      | Standard Orientation (Ångstroms) |           |           |
|-------|------|------|----------------------------------|-----------|-----------|
| No.   | Atom | Type | X                                | Y         | Z         |
| 1     | 6    | 0    | -0.399995                        | 2.728075  | -2.304726 |
| 2     | 6    | 0    | -0.571271                        | 2.538317  | -0.934399 |
| 3     | 6    | 0    | -0.596622                        | 1.250473  | -0.361748 |
| 4     | 6    | 0    | -0.463891                        | 0.126558  | -1.218615 |
| 5     | 6    | 0    | -0.303177                        | 0.336244  | -2.596208 |
| 6     | 6    | 0    | -0.266166                        | 1.619272  | -3.145479 |
| 7     | 6    | 0    | -0.472078                        | -1.295235 | -0.692573 |
| 8     | 6    | 0    | 0.841584                         | -1.715040 | -0.000051 |
| 9     | 6    | 0    | 0.649871                         | -3.073915 | 0.695241  |
| 10    | 8    | 0    | 1.881922                         | -1.754562 | -0.980122 |
| 11    | 7    | 0    | 1.320455                         | -4.108425 | 0.154134  |
| 12    | 8    | 0    | -0.095039                        | -3.173743 | 1.679297  |
| 13    | 6    | 0    | -0.780881                        | 1.084525  | 1.095425  |
| 14    | 6    | 0    | -0.413294                        | 1.963964  | 2.043976  |
| 15    | 6    | 0    | -0.648216                        | 1.781099  | 3.514896  |
| 16    | 1    | 0    | -0.389494                        | 3.733987  | -2.714667 |
| 17    | 1    | 0    | -0.713676                        | 3.402717  | -0.292961 |
| 18    | 1    | 0    | -0.202203                        | -0.527348 | -3.248217 |
| 19    | 1    | 0    | -0.143526                        | 1.750119  | -4.216671 |
| 20    | 1    | 0    | -1.286265                        | -1.449687 | 0.021654  |
| 21    | 1    | 0    | -0.644993                        | -1.987134 | -1.524257 |
| 22    | 1    | 0    | 1.085682                         | -0.994486 | 0.788140  |
| 23    | 1    | 0    | 2.721298                         | -1.512684 | -0.565977 |
| 24    | 1    | 0    | 1.231270                         | -5.033260 | 0.550722  |
| 25    | 1    | 0    | 1.913500                         | -3.959742 | -0.650327 |
| 26    | 1    | 0    | -1.254812                        | 0.160631  | 1.423387  |
| 27    | 1    | 0    | 0.102267                         | 2.879695  | 1.754070  |
| 28    | 1    | 0    | -1.153440                        | 0.834338  | 3.729720  |
| 29    | 1    | 0    | 0.297826                         | 1.802237  | 4.070916  |
| 30    | 1    | 0    | -1.262637                        | 2.597010  | 3.917421  |
